# Supplementary material
Source: PubMed Central journal article supplement (PMC6768179)
Supplement: kpsb-14-09-1629268-s001.pdf [file kpsb-14-09-1629268-s001.pdf]

**Figure S1** Sequence diversities of small RNAs mapped onto (A) tRNAs and (B) rRNAs in rice roots and shoots under arsenic stress. X axes indicate small RNAs (sRNAs) of different sequence length. Y axes measure the sRNA diversities, i.e. the numbers of different sRNA sequences. Root-CK: sRNAs in rice roots under normal growth condition. Root-As: sRNAs in rice roots under arsenic stress. Shoot-CK: sRNAs in rice shoots under normal growth condition. Shoot-As: sRNAs in rice shoots under arsenic stress. tRF: sRNAs mapped onto tRNAs. rRF: sRNAs mapped onto rRNAs.

**A**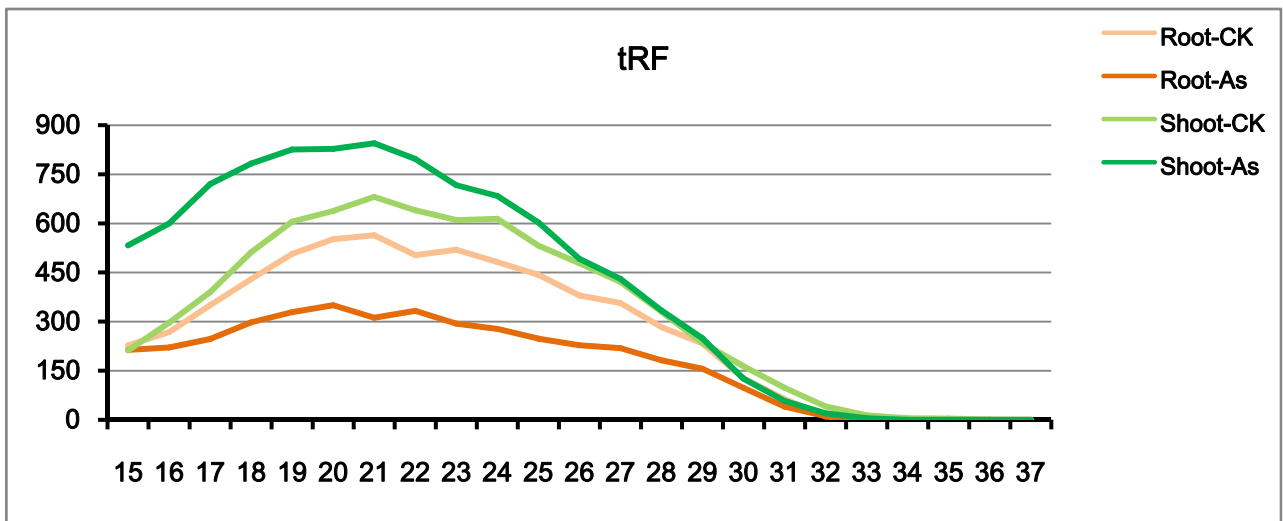**B**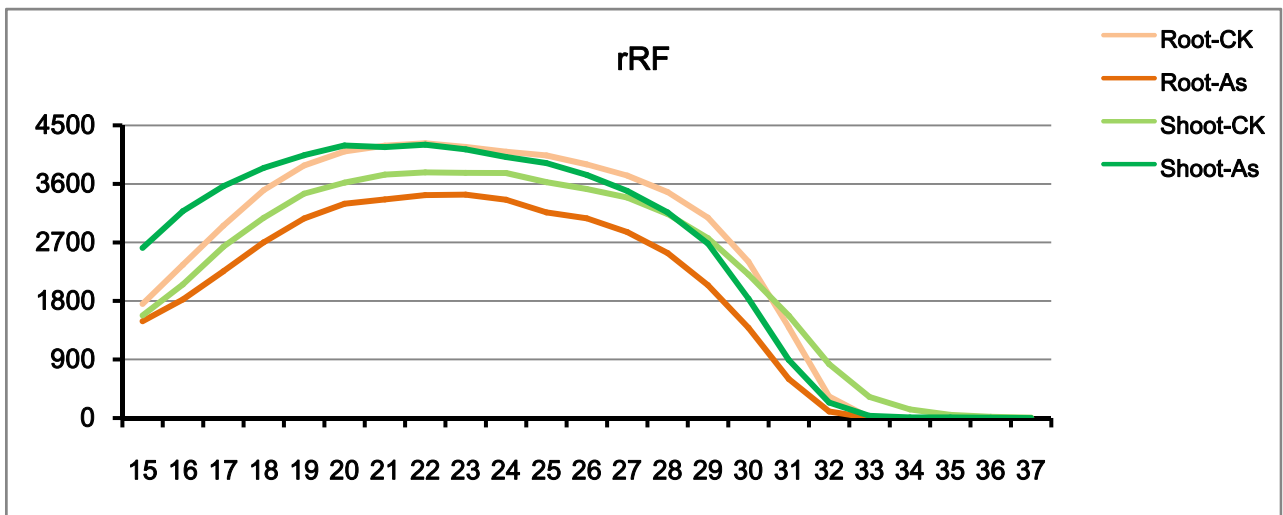

**Figure S2** Degradome sequencing data-based evidence showing the protein-coding targets regulated by the arsenic stress-responsive small RNAs. On each page, the degradome sequencing evidence is displayed as target plots (t-plots) for each small RNA (sRNA)--target pairs. The first t-plot presents the global distribution of degradome signals along the full-length target transcript, with transcript ID and degradome-seq data set IDs shown on the top. The other panel(s) provide(s) a detailed view of degradome signals surrounding the predicted binding site (blue line) of the arsenic-responsive sRNA (ID shown on the top) on the target transcript, which clearly shows the degradome-seq evidence (marked by red arrowheads) supporting the regulatory relationship. For each t-plot, the Y axis measures the degradome signal intensity in RPM (reads per million), and the X axis indicate the position on the target transcript.

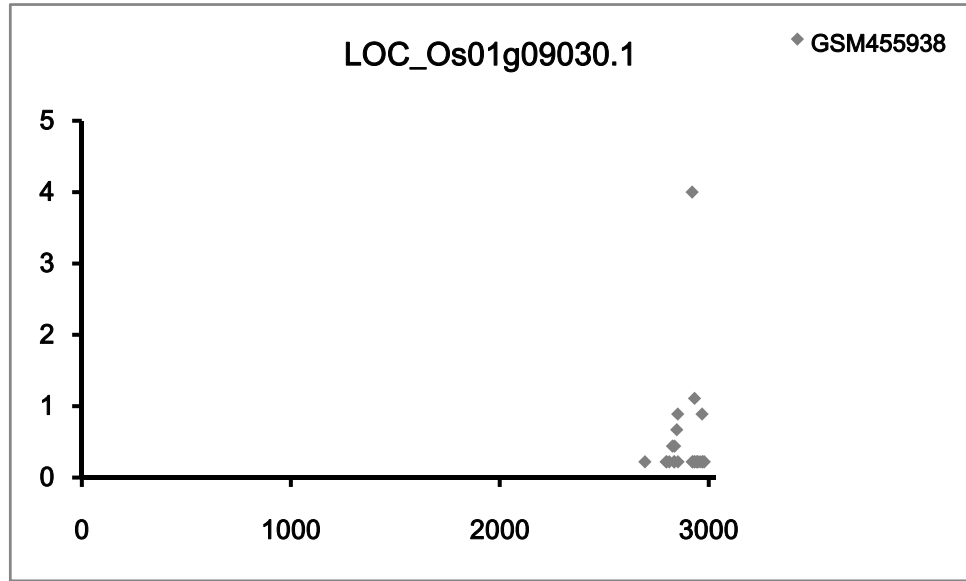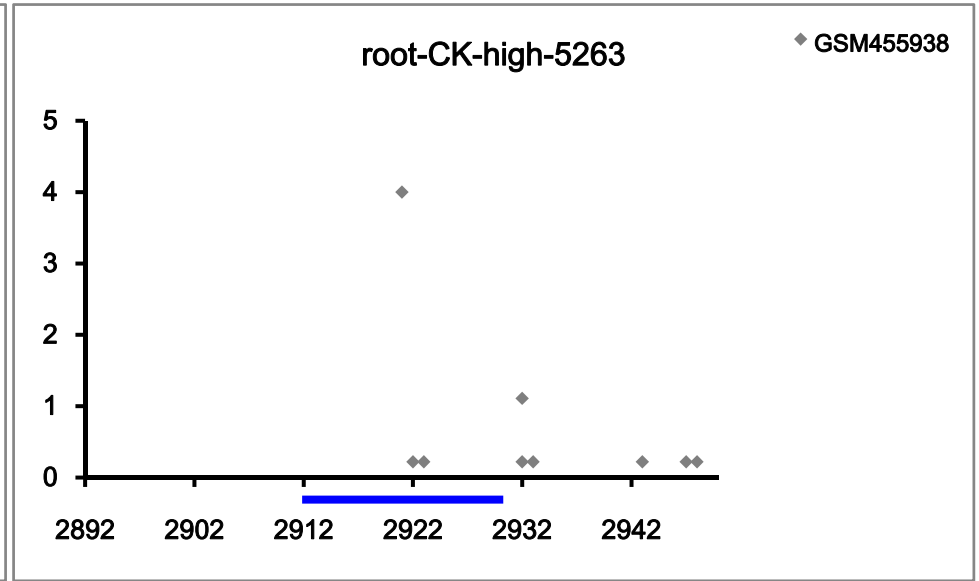

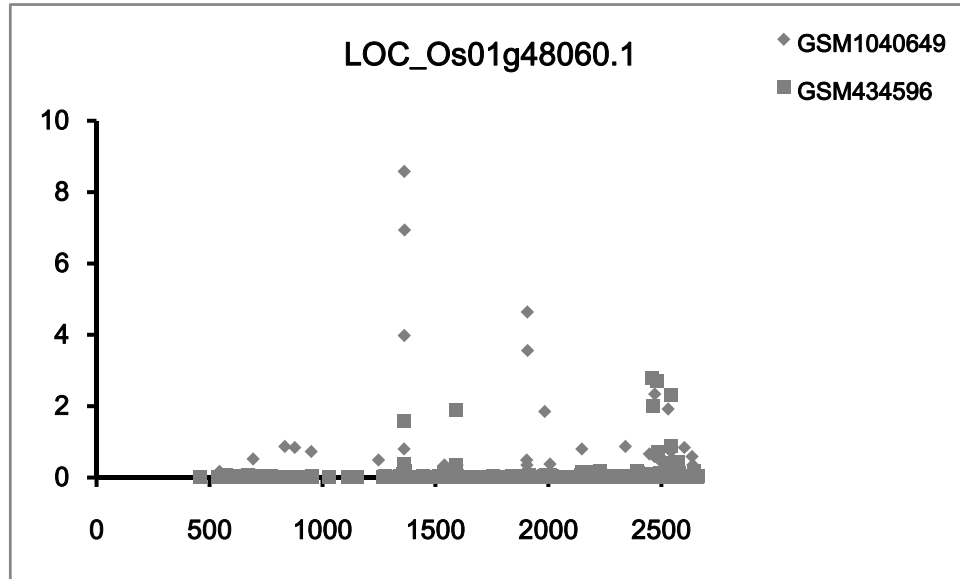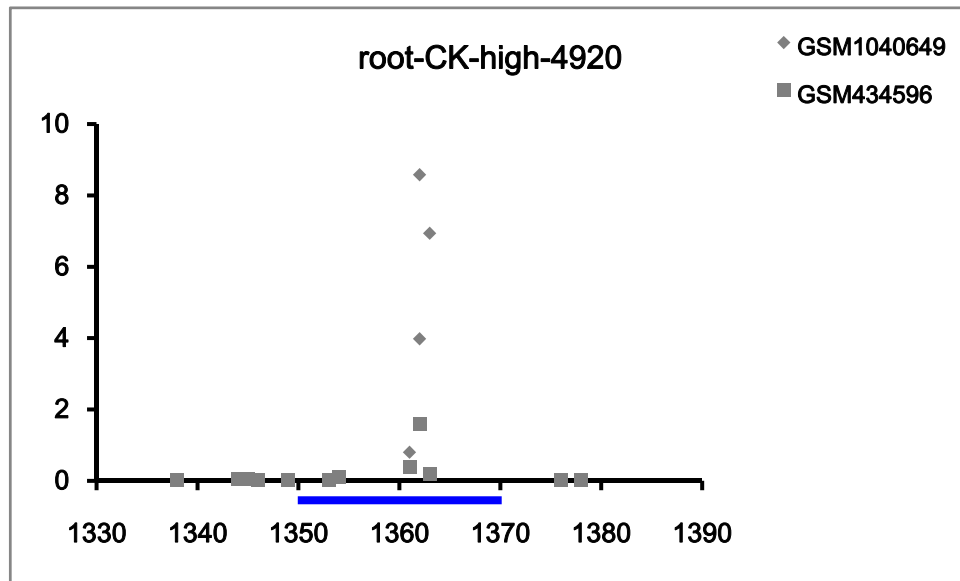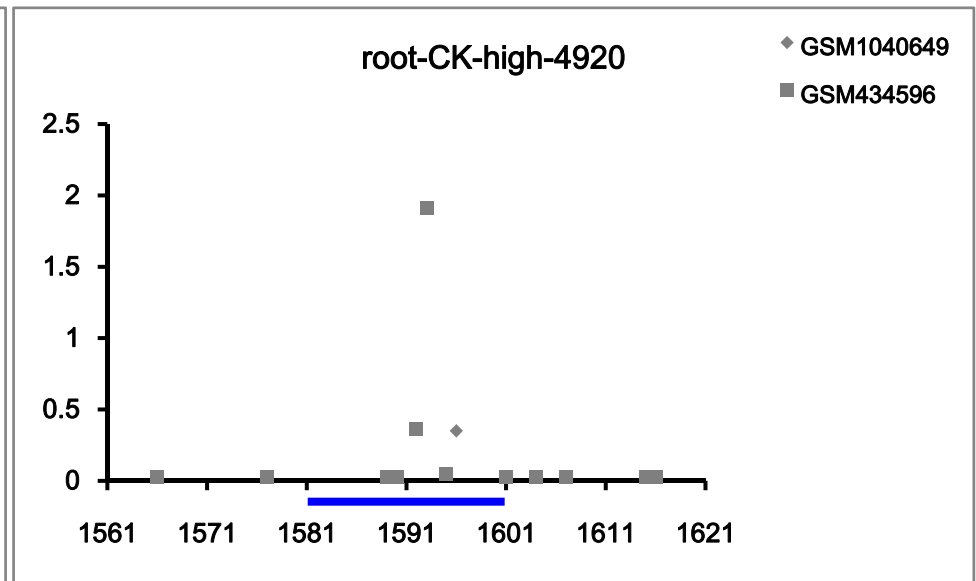

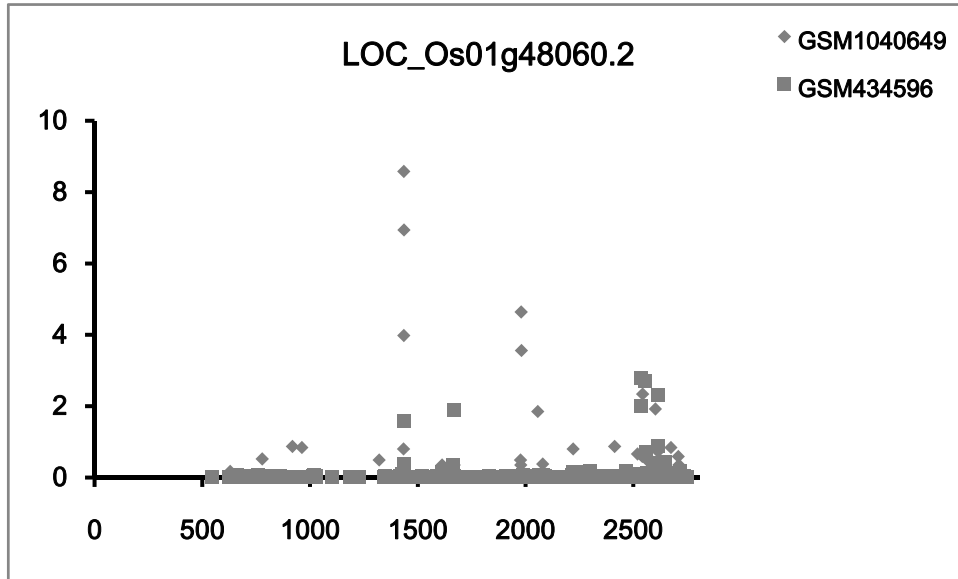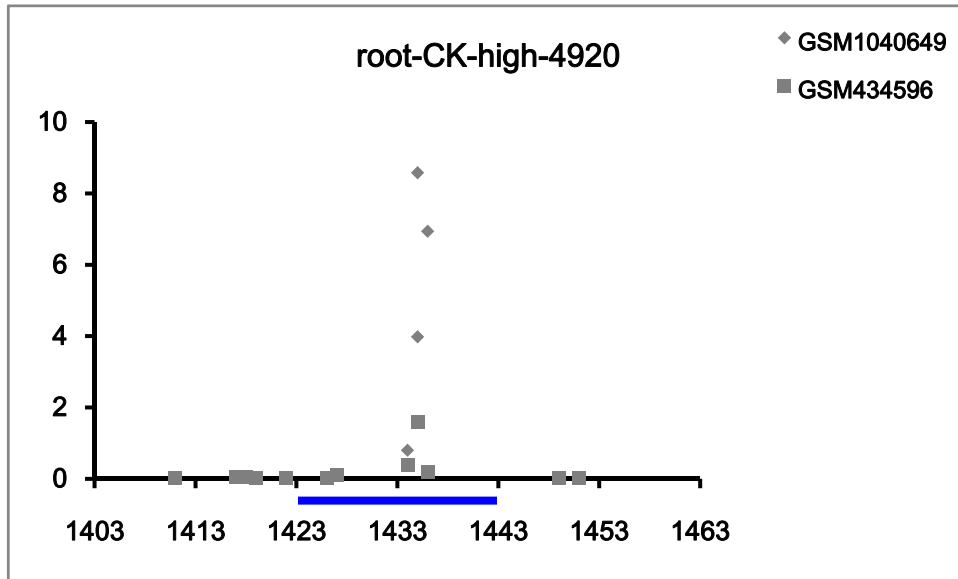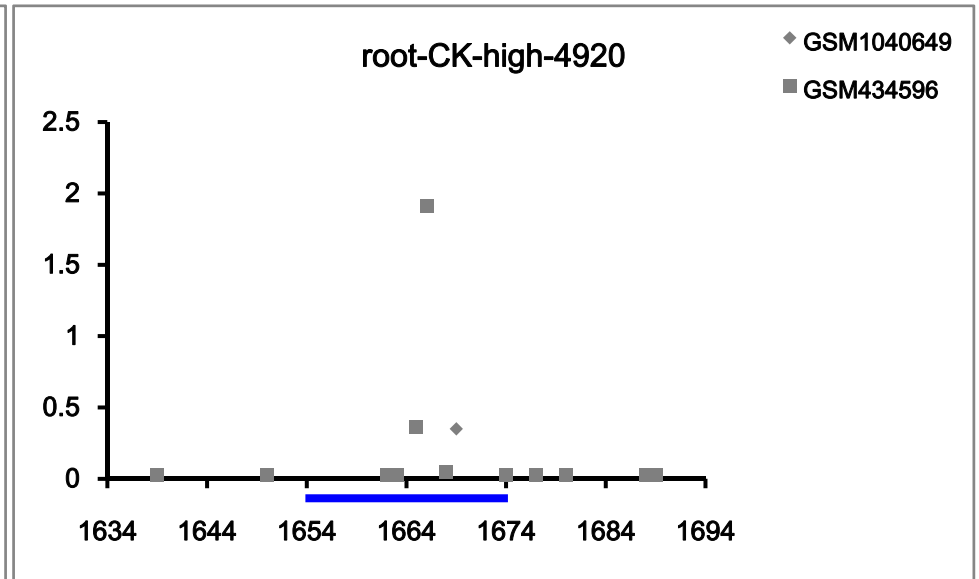

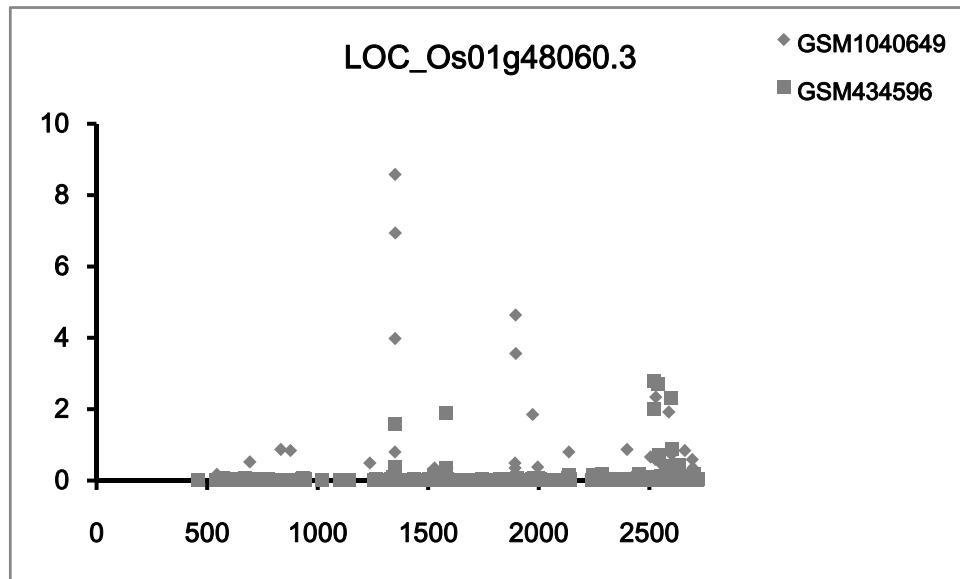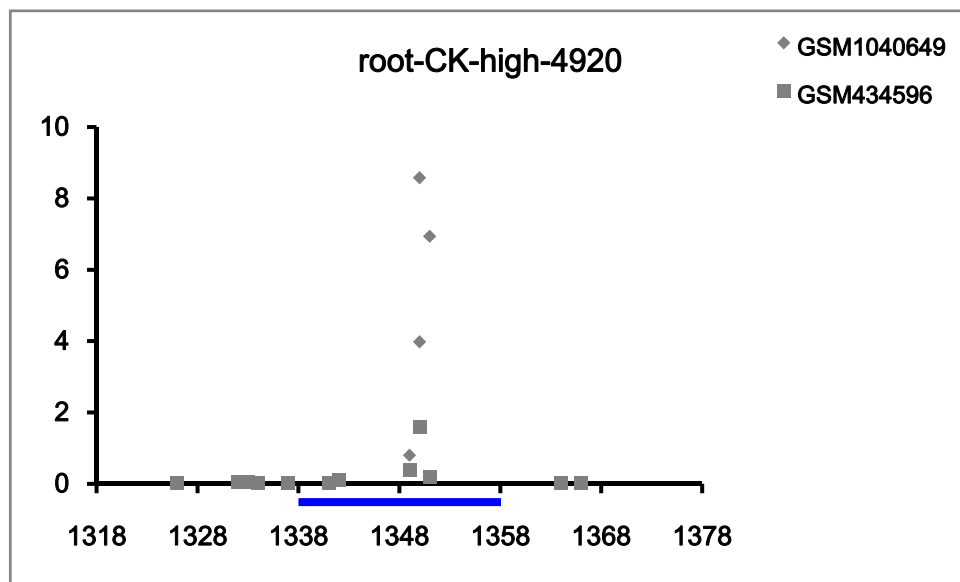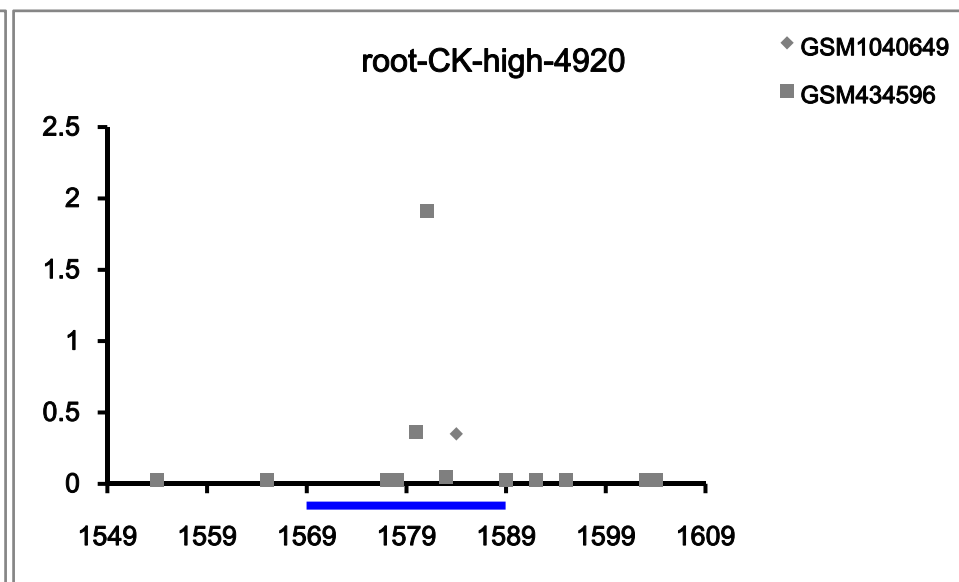

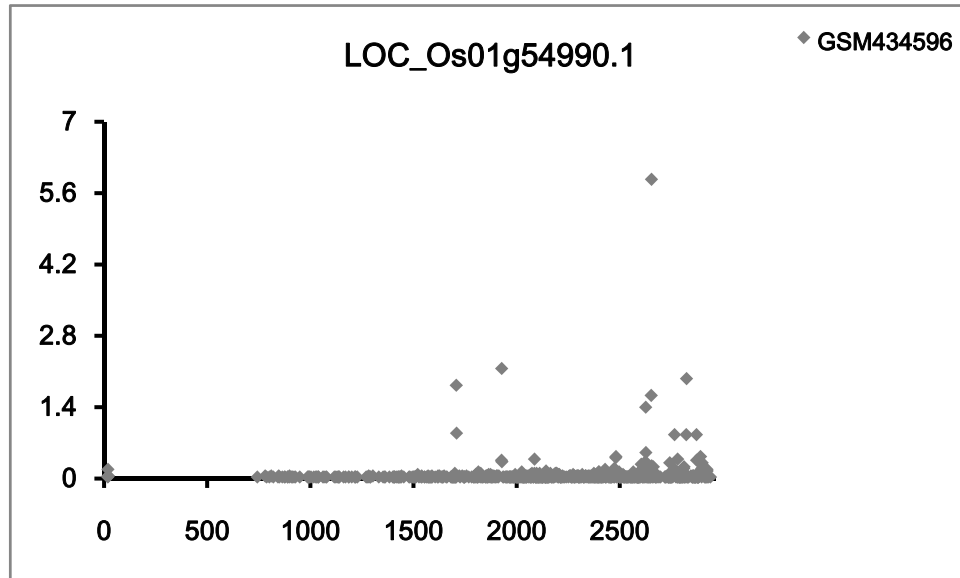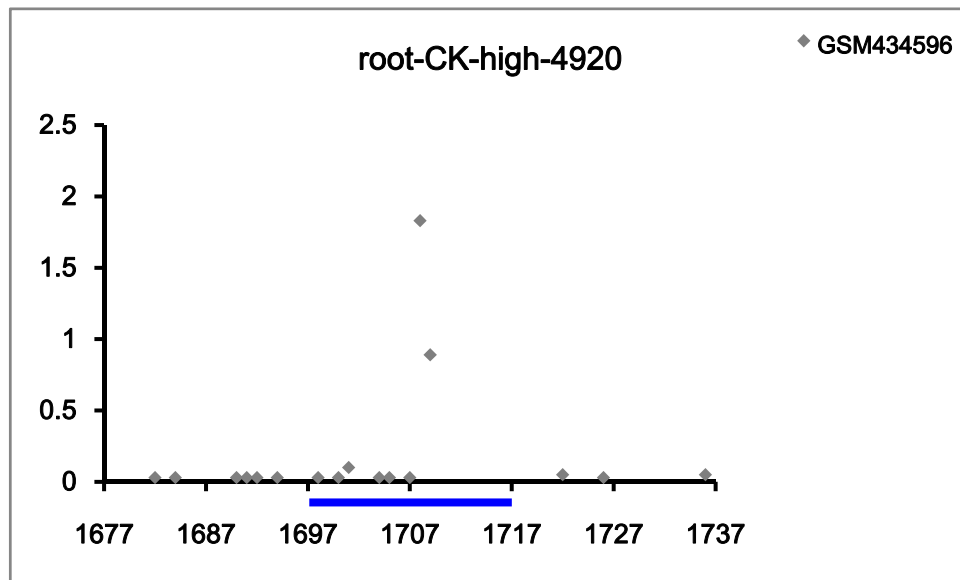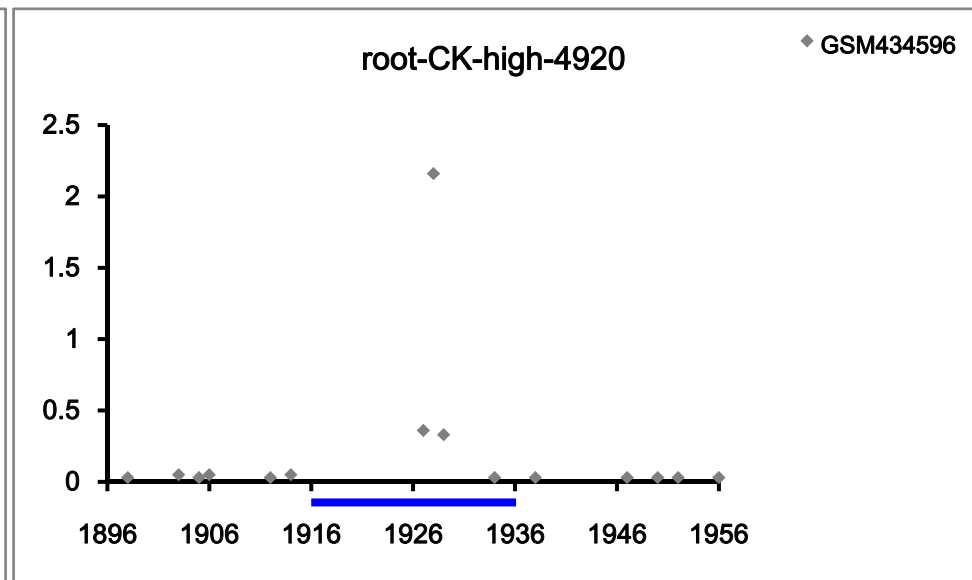



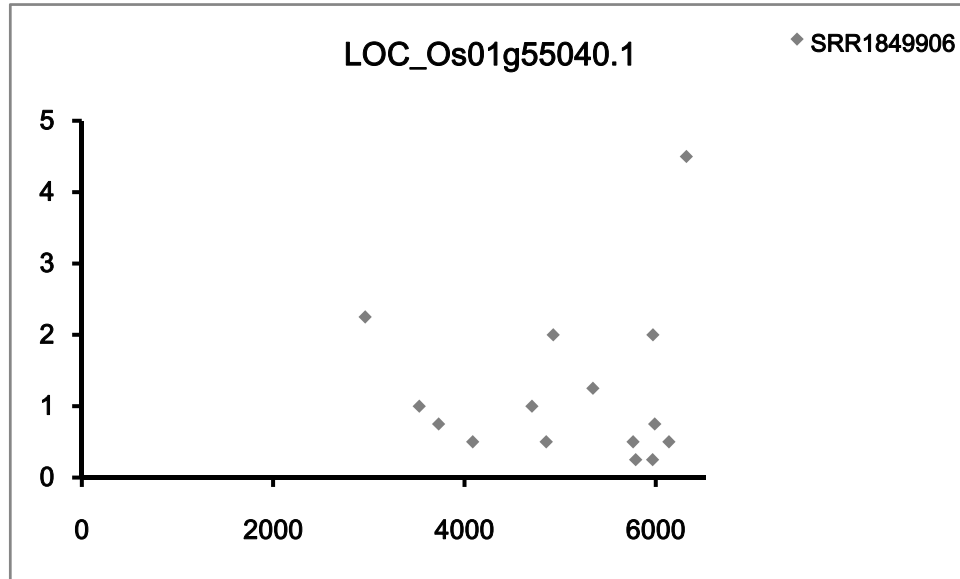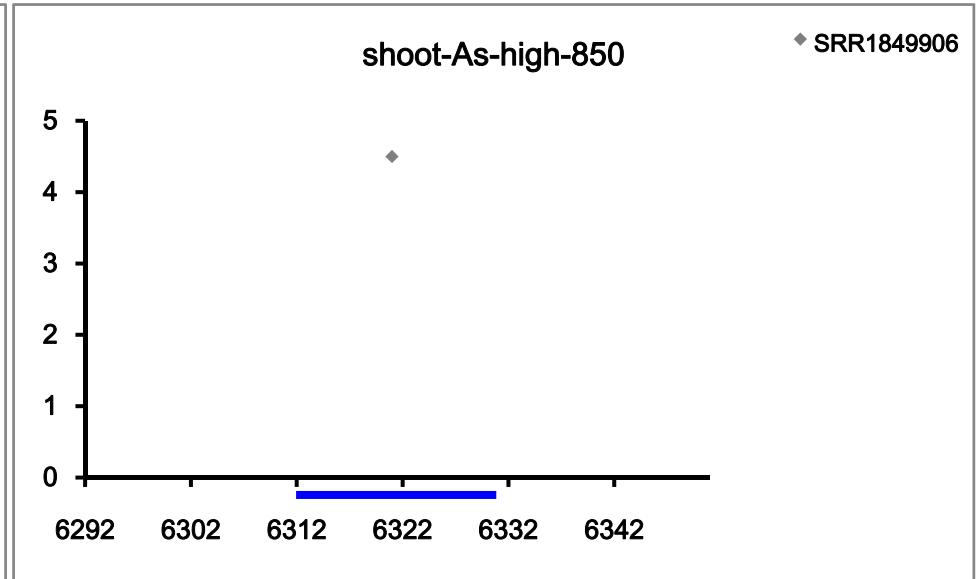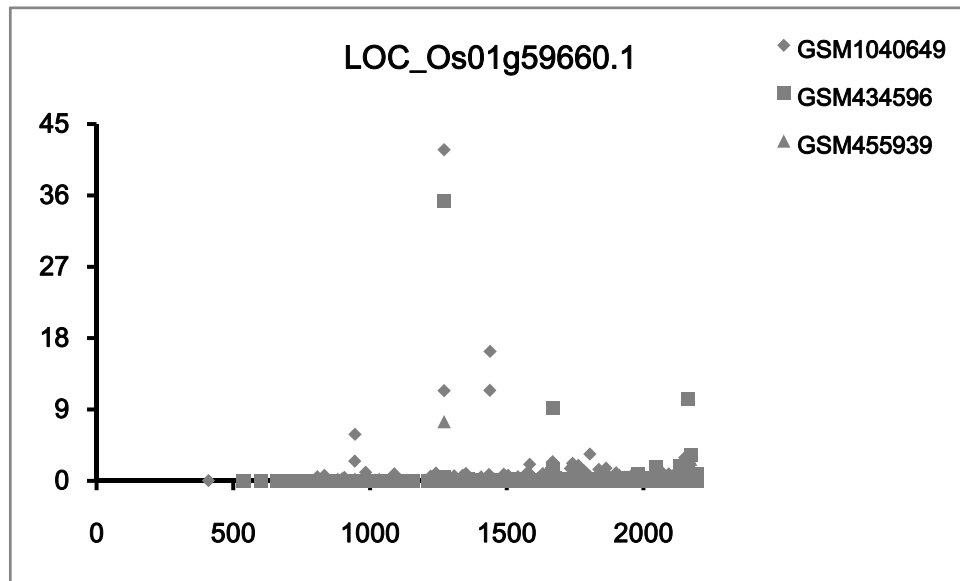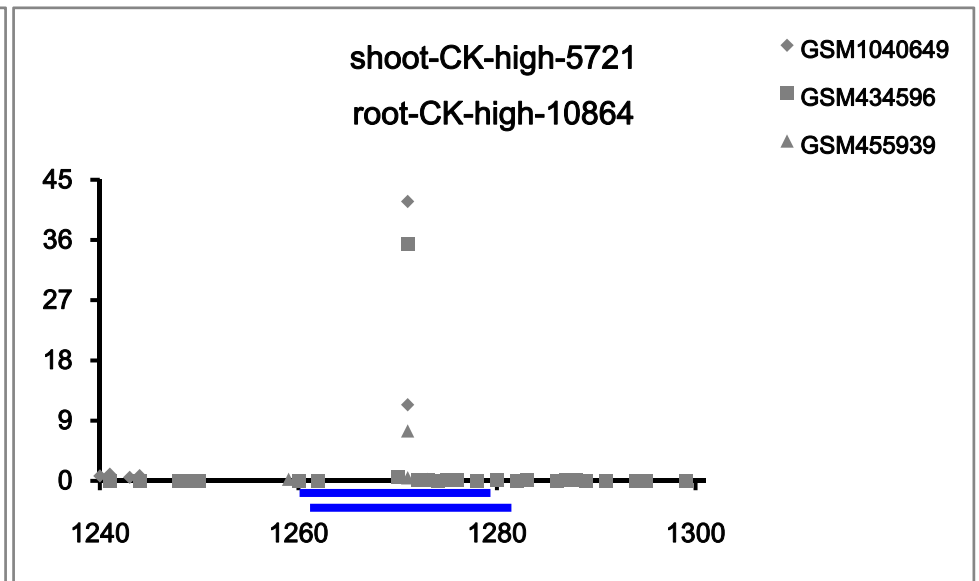

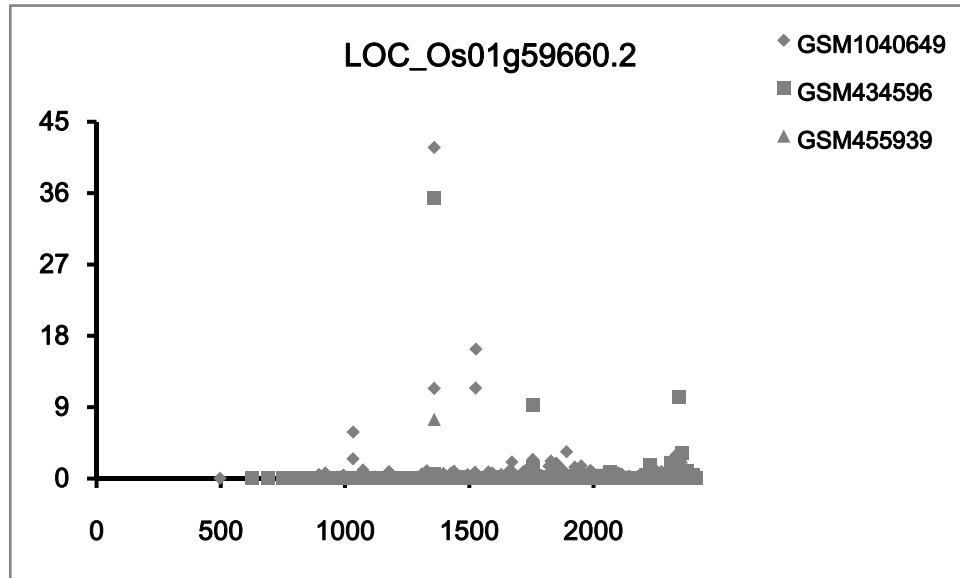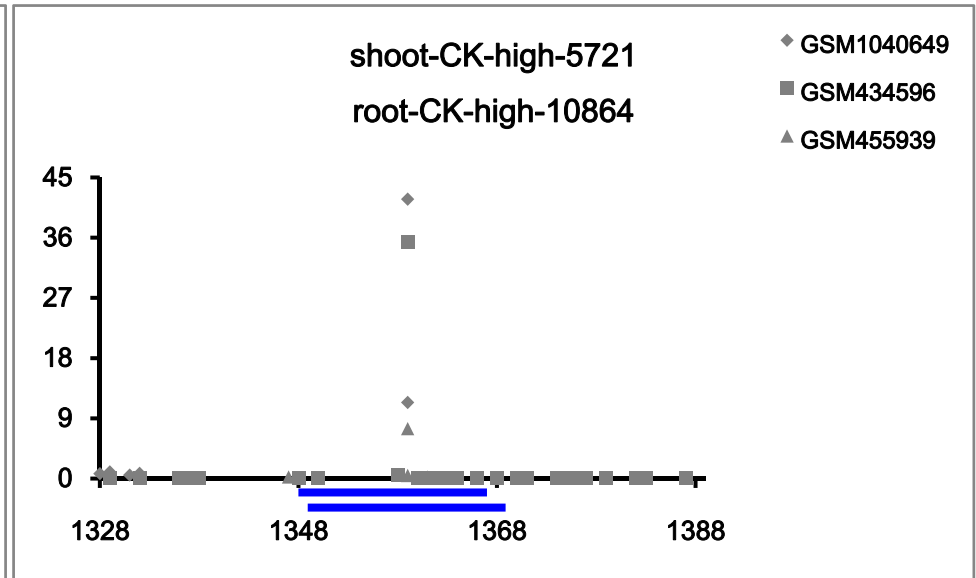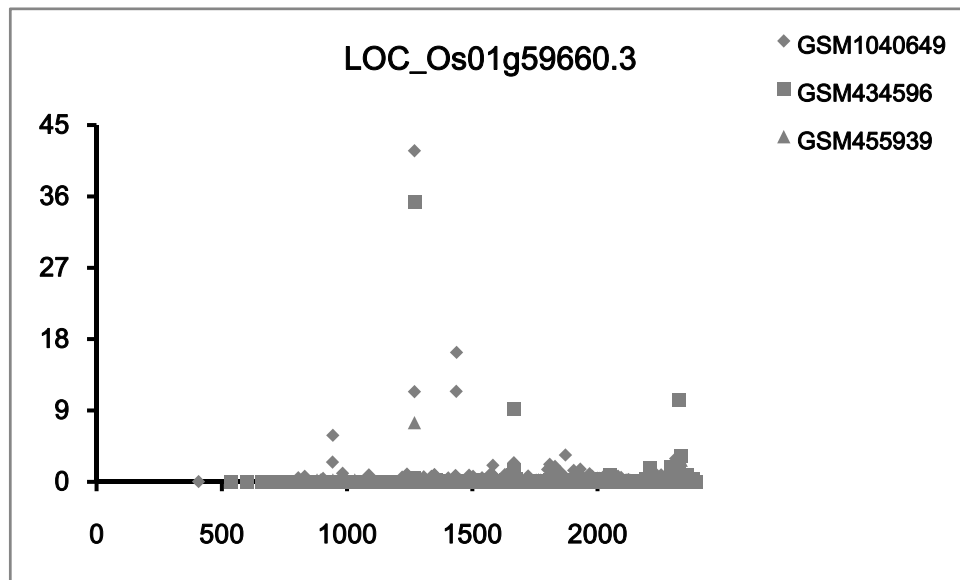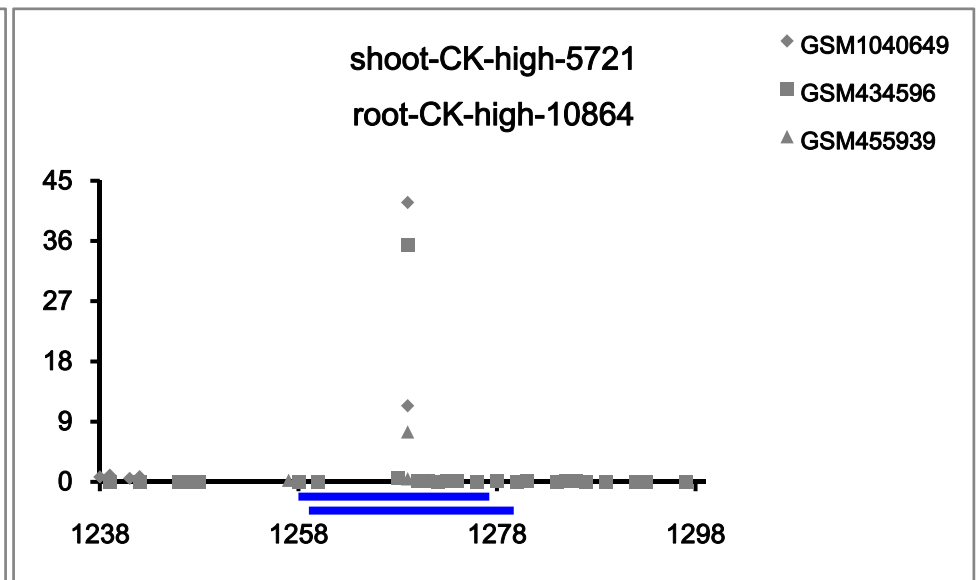

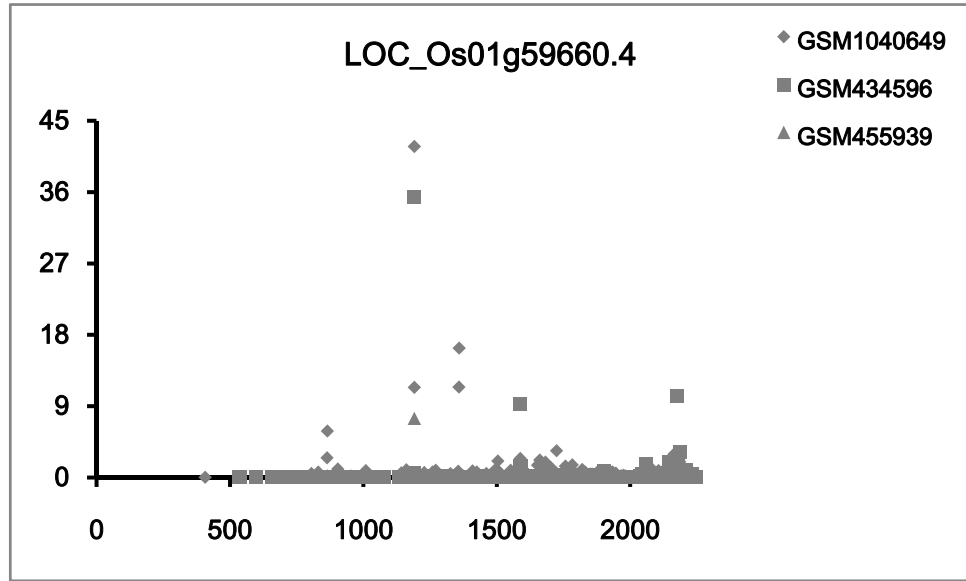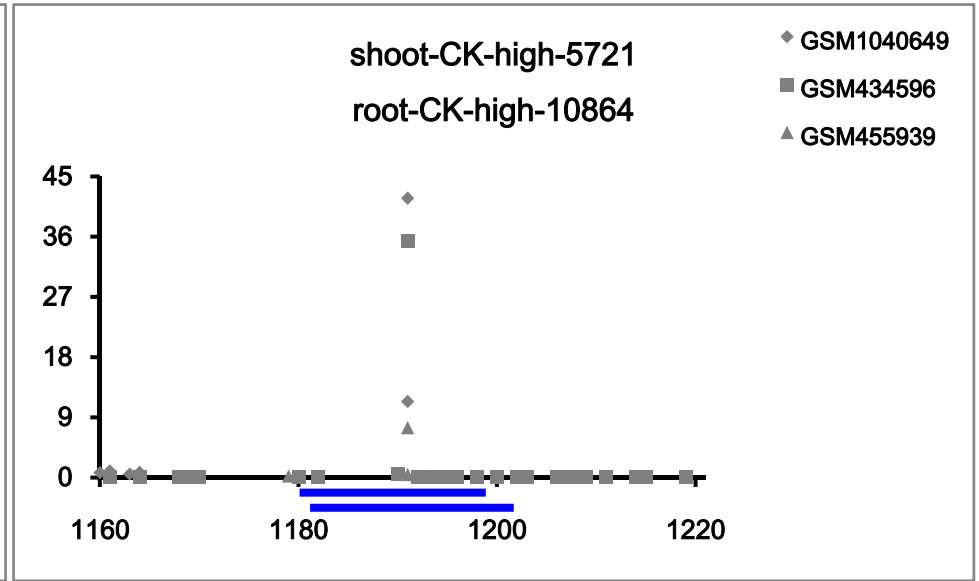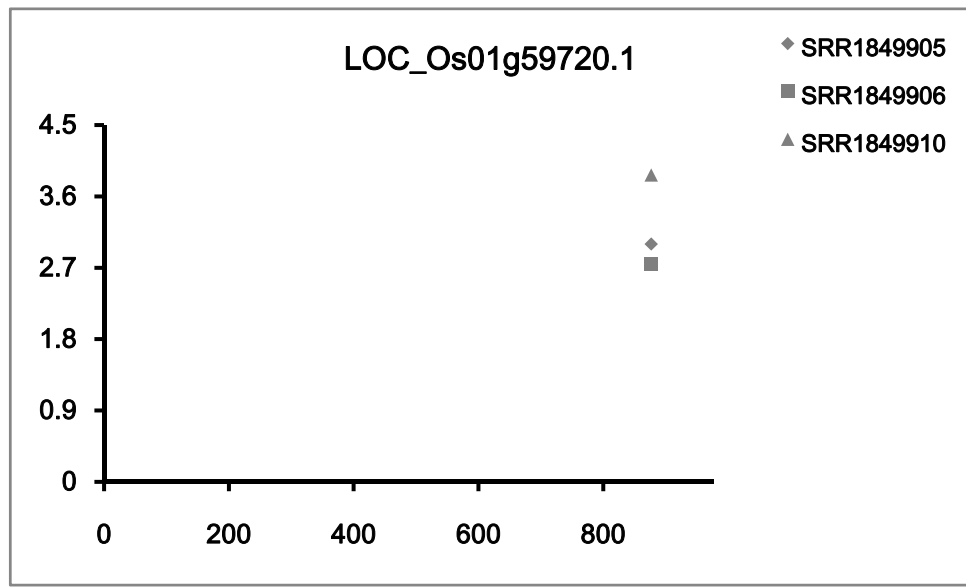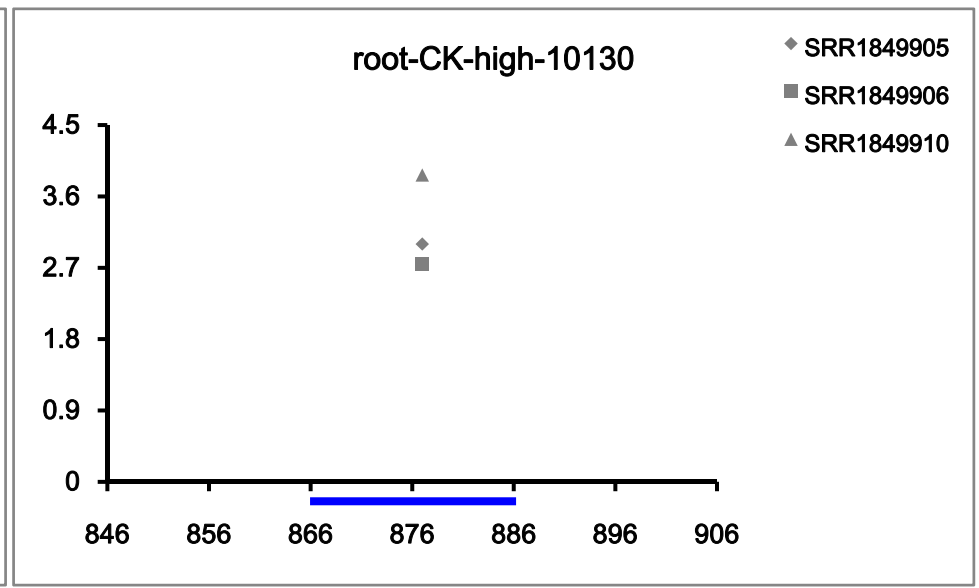

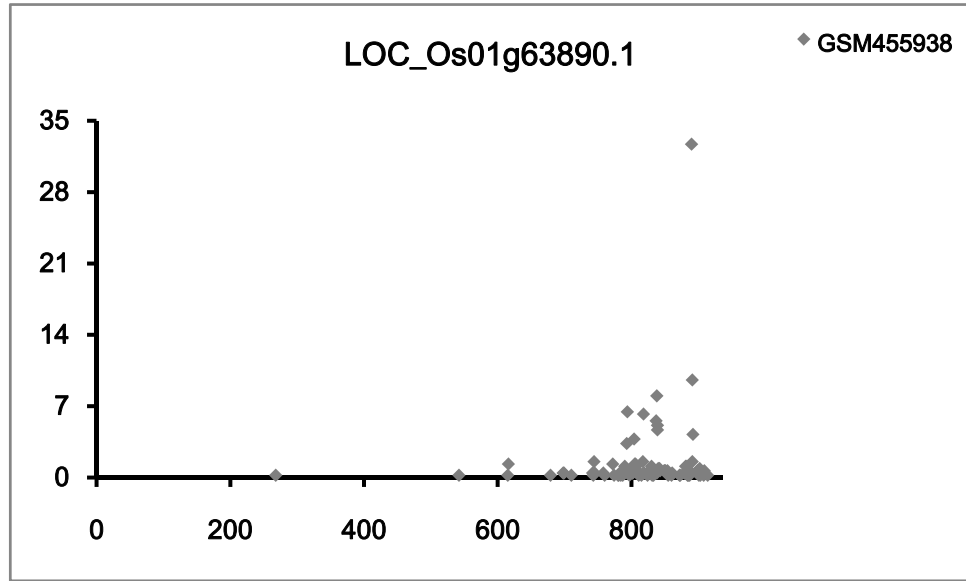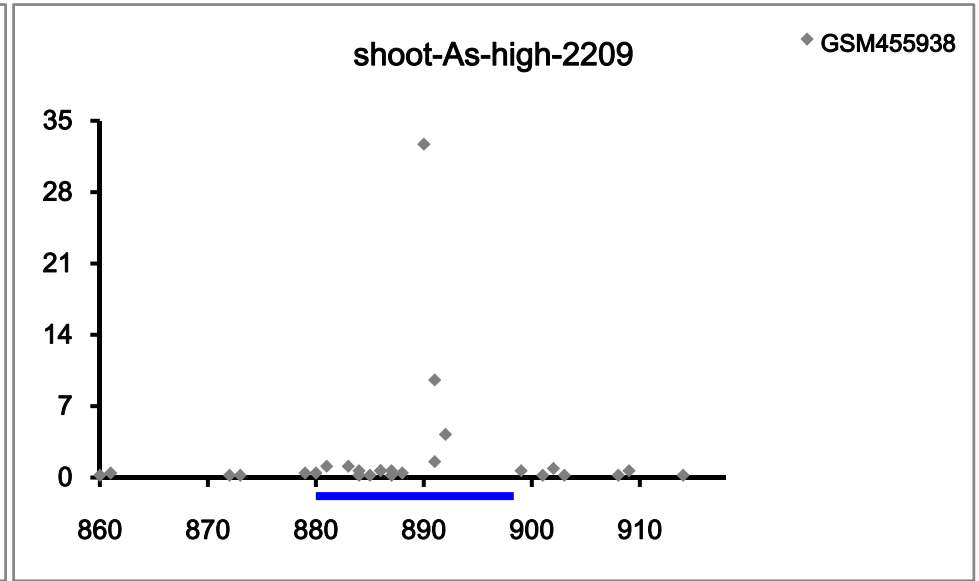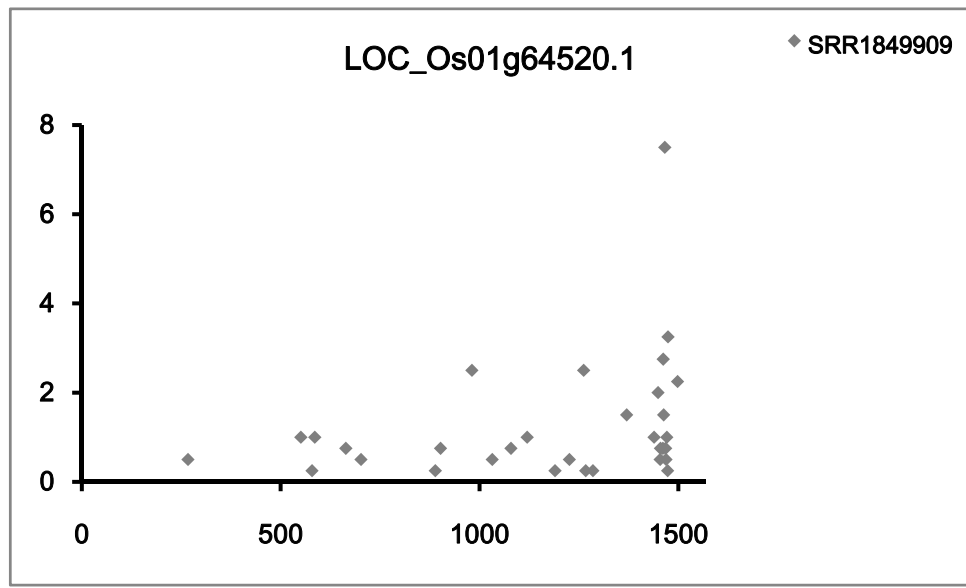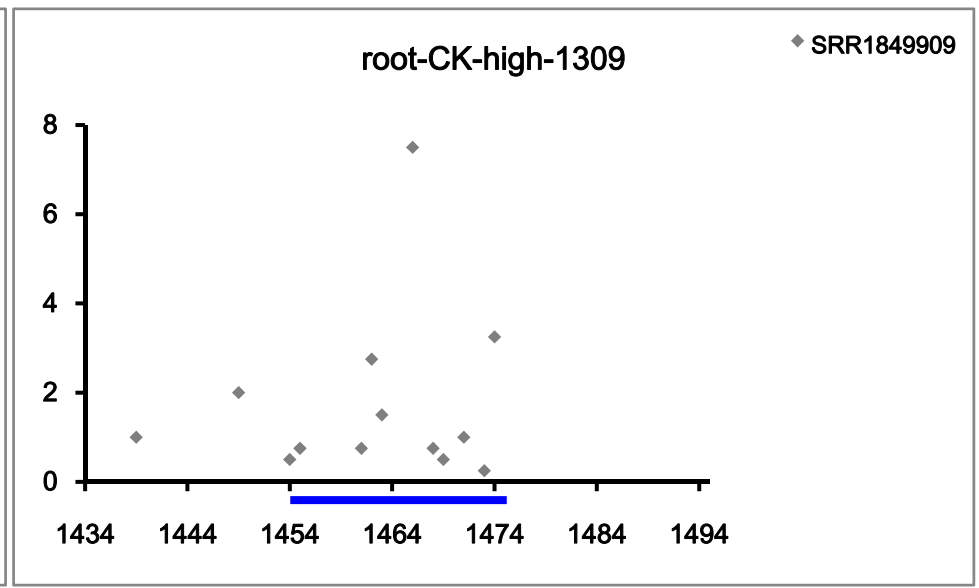

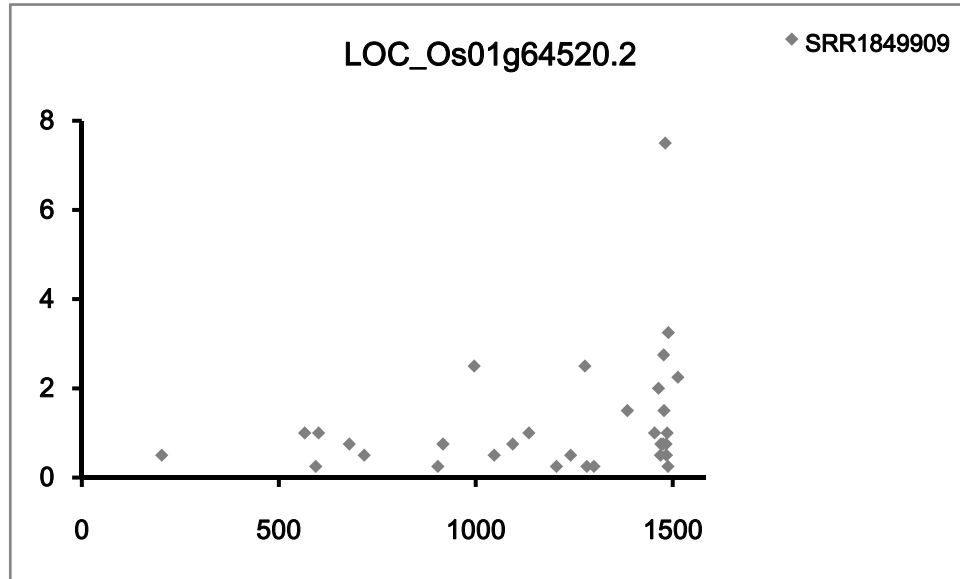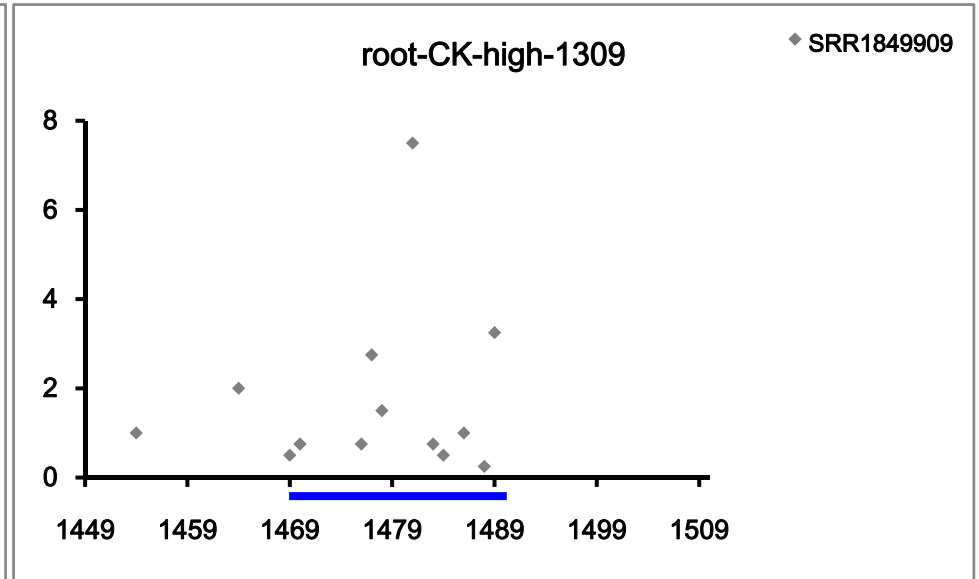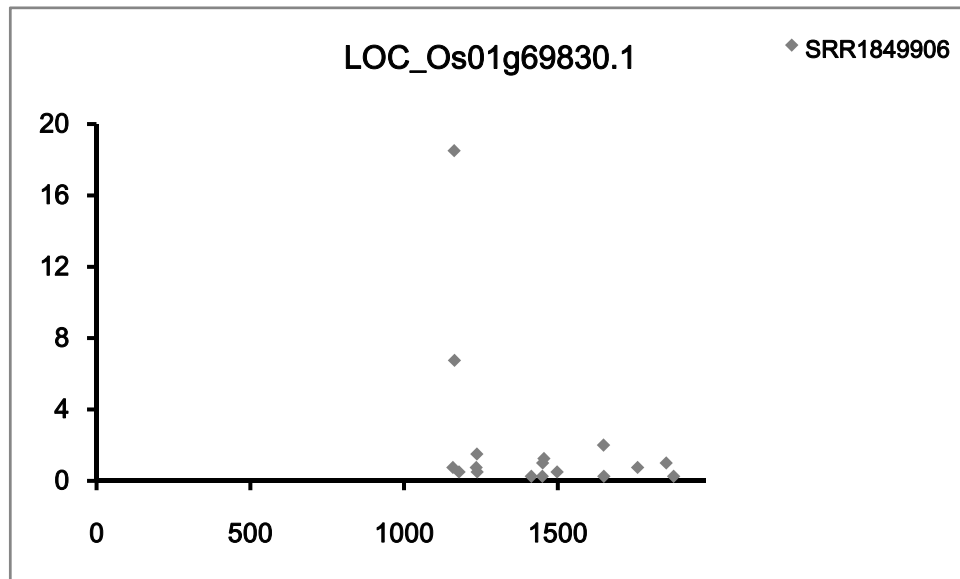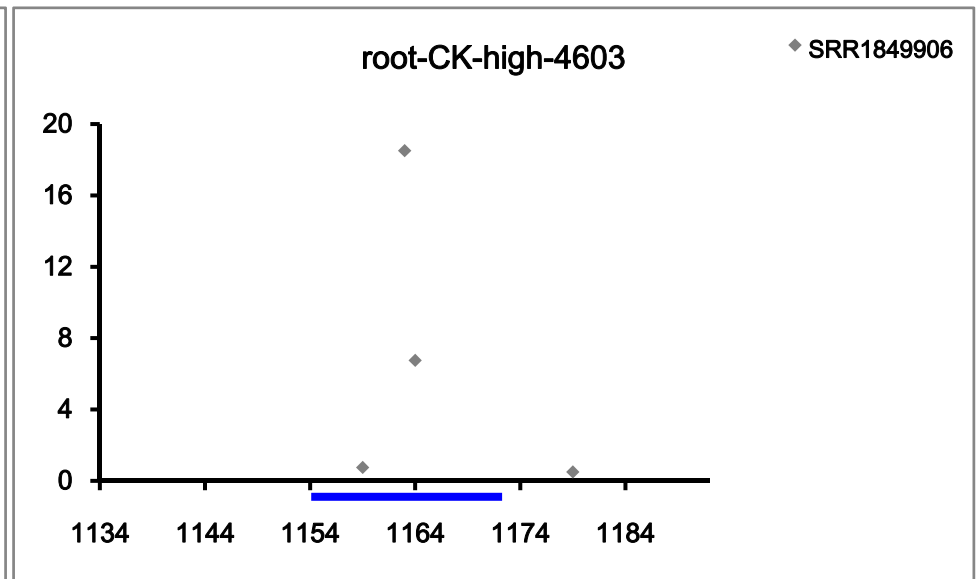

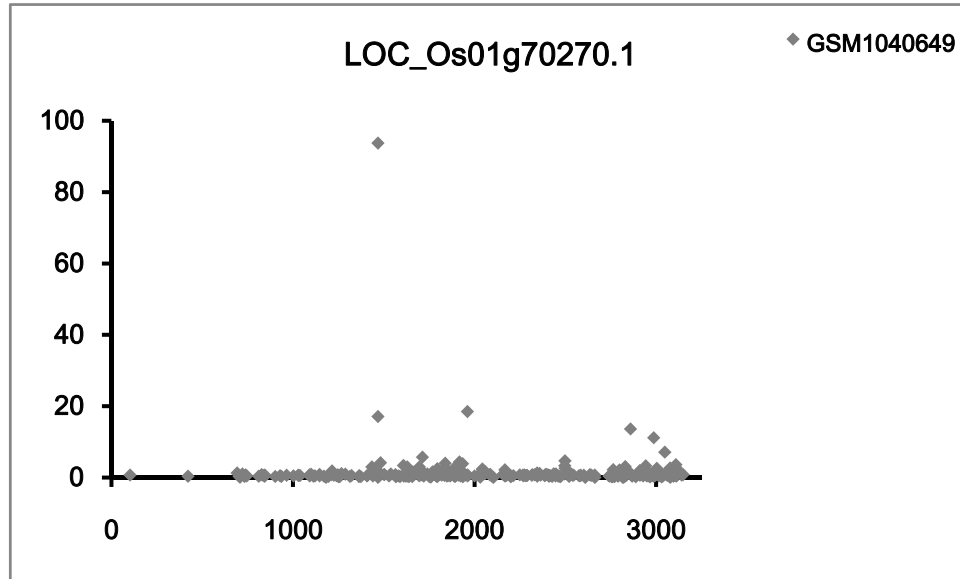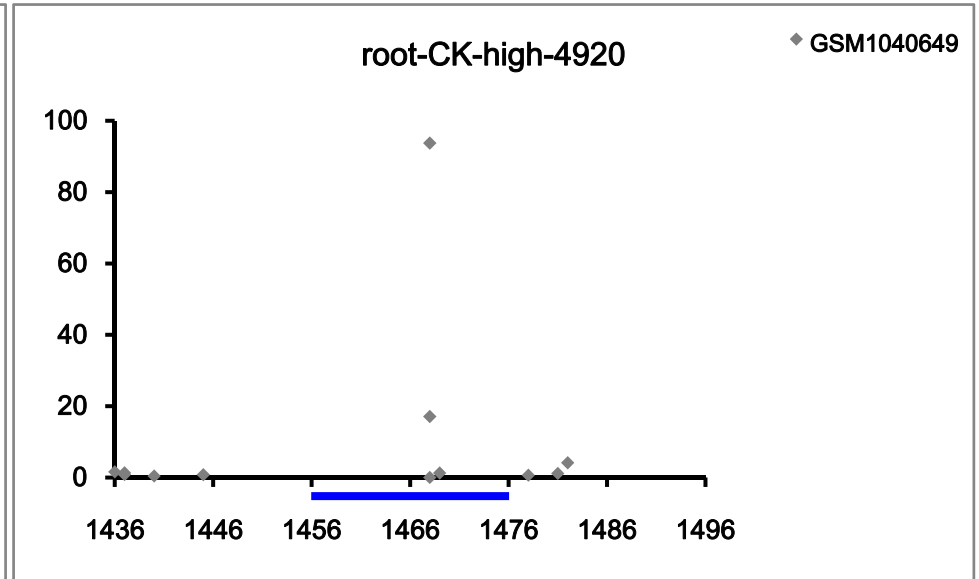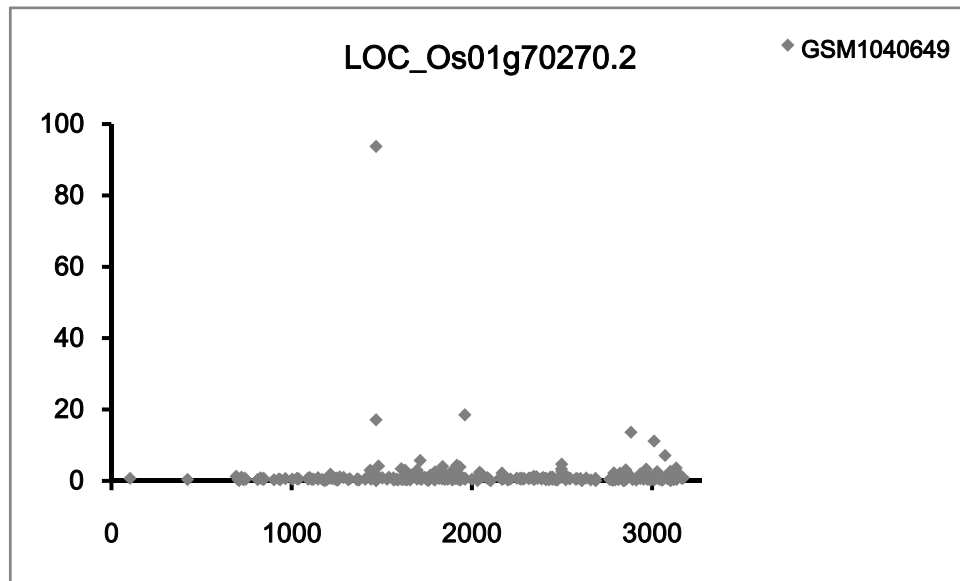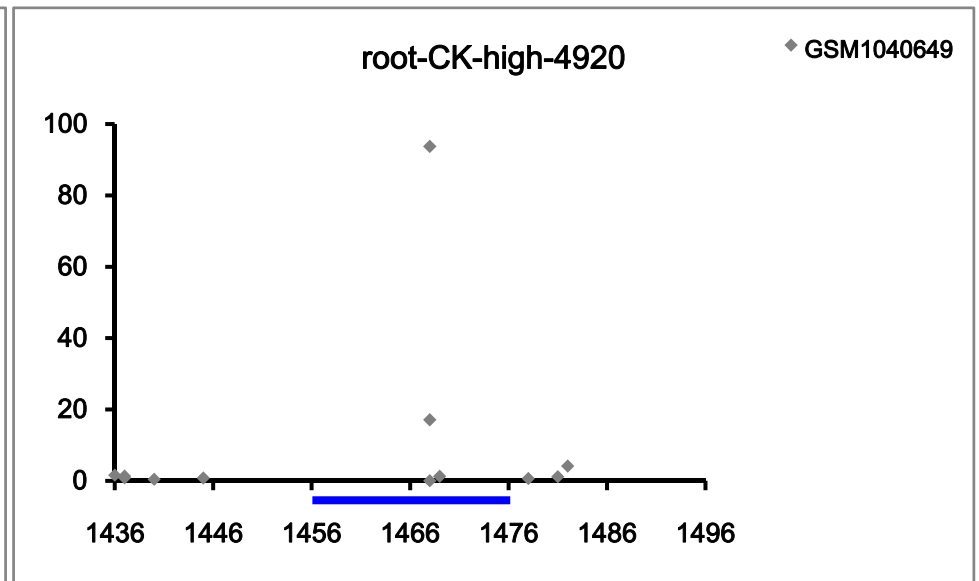

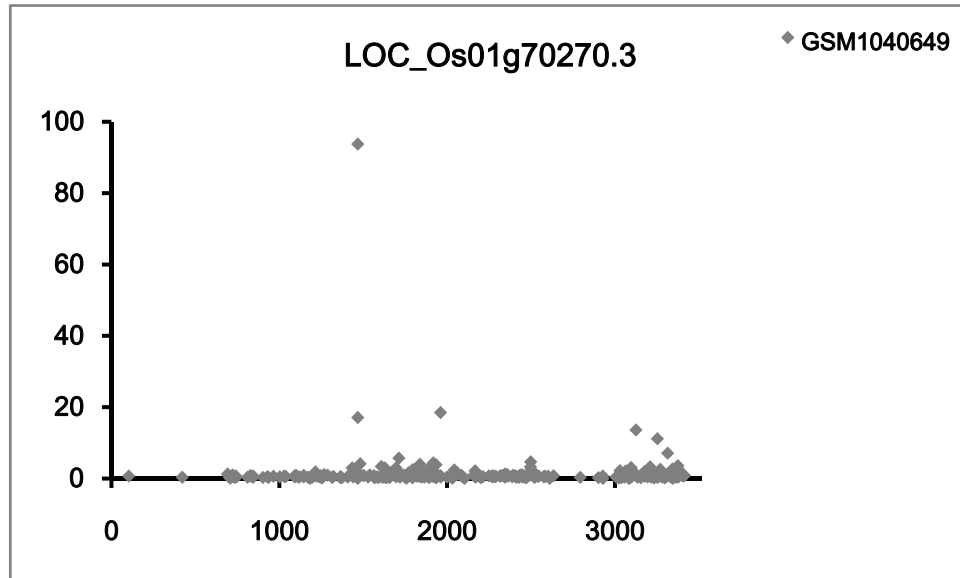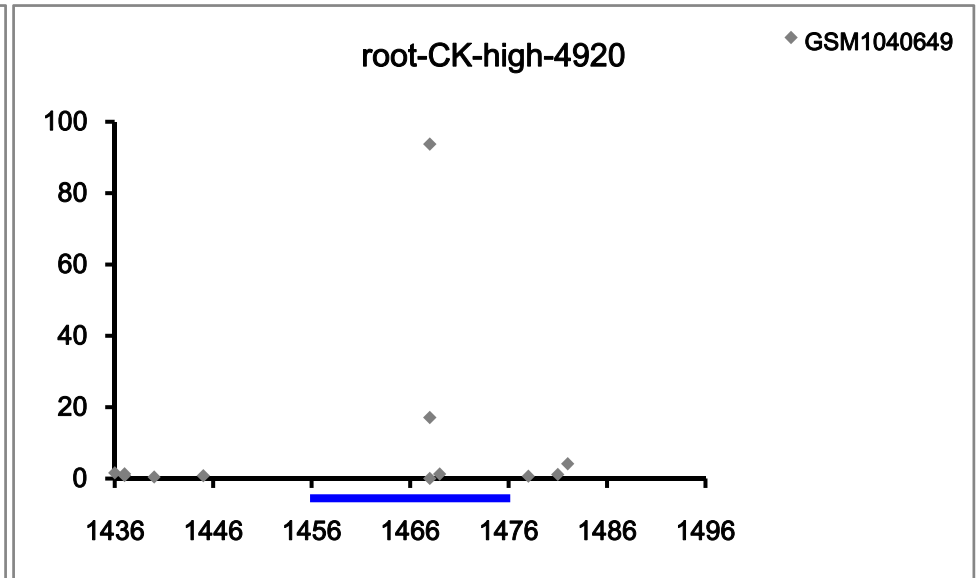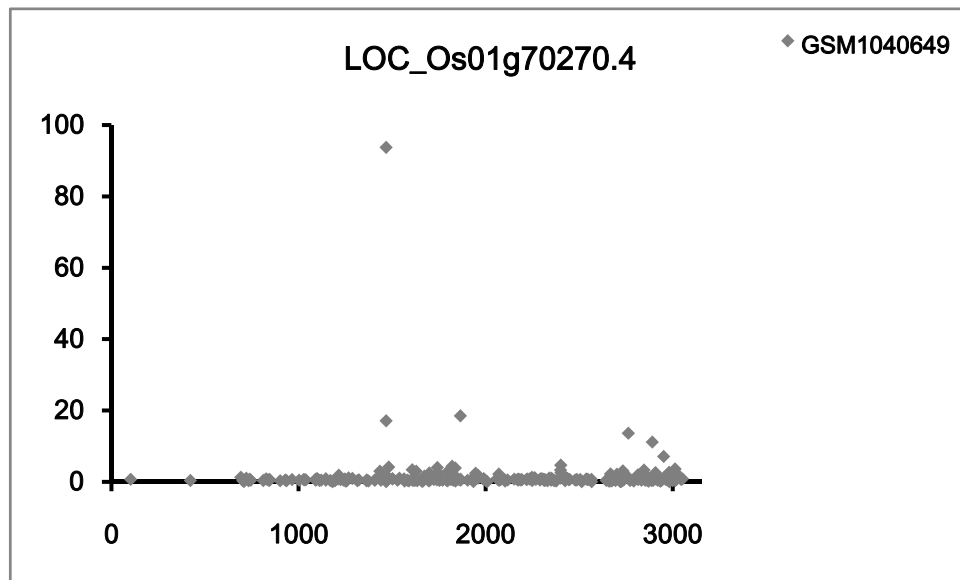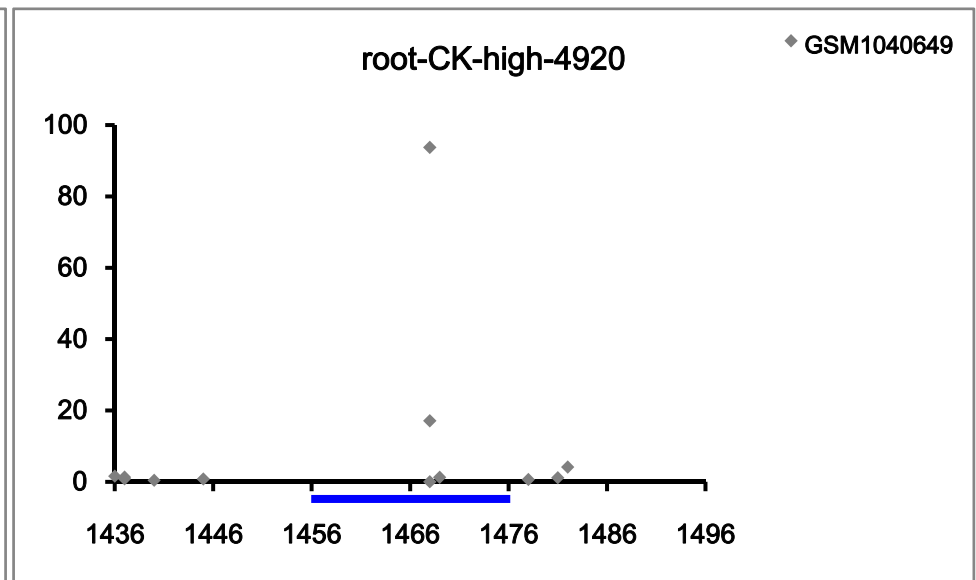

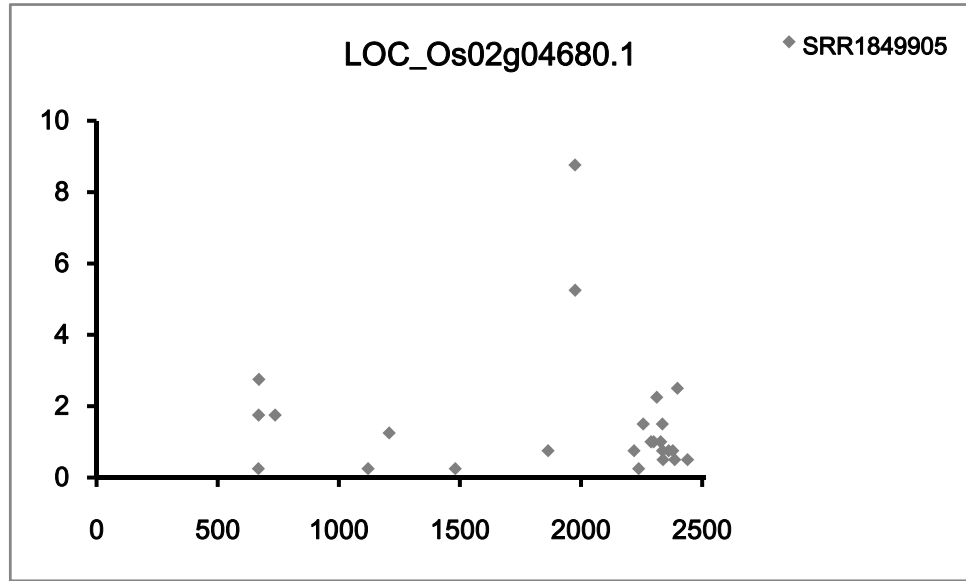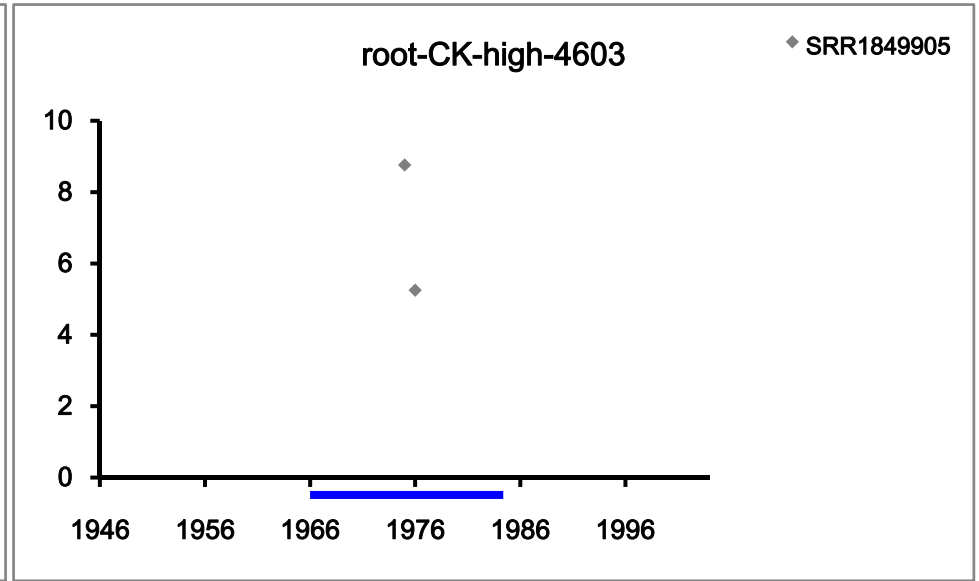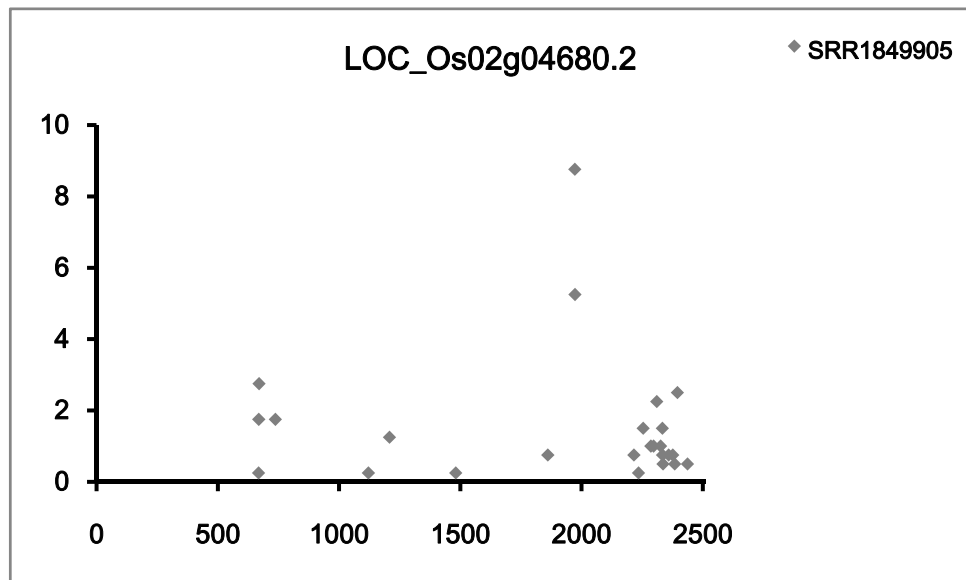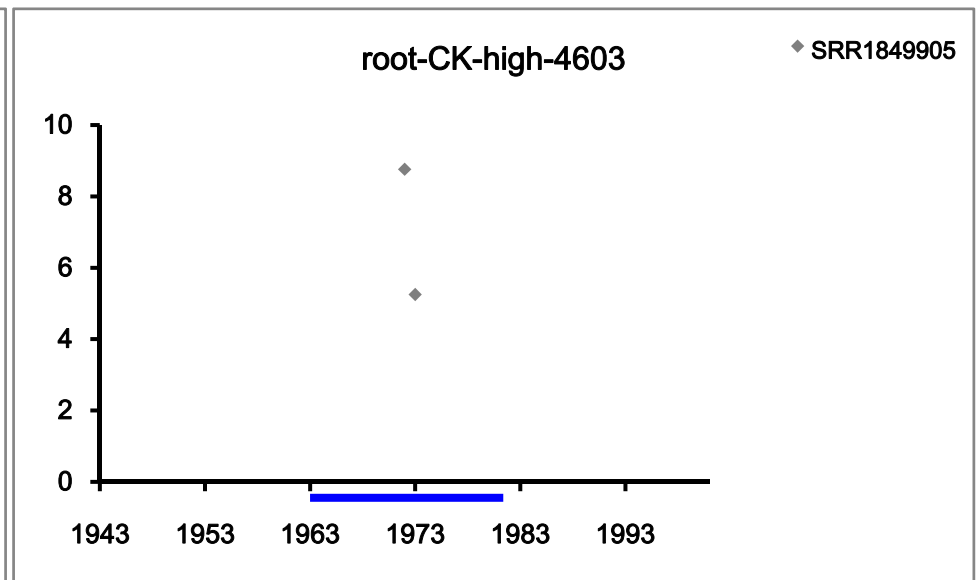



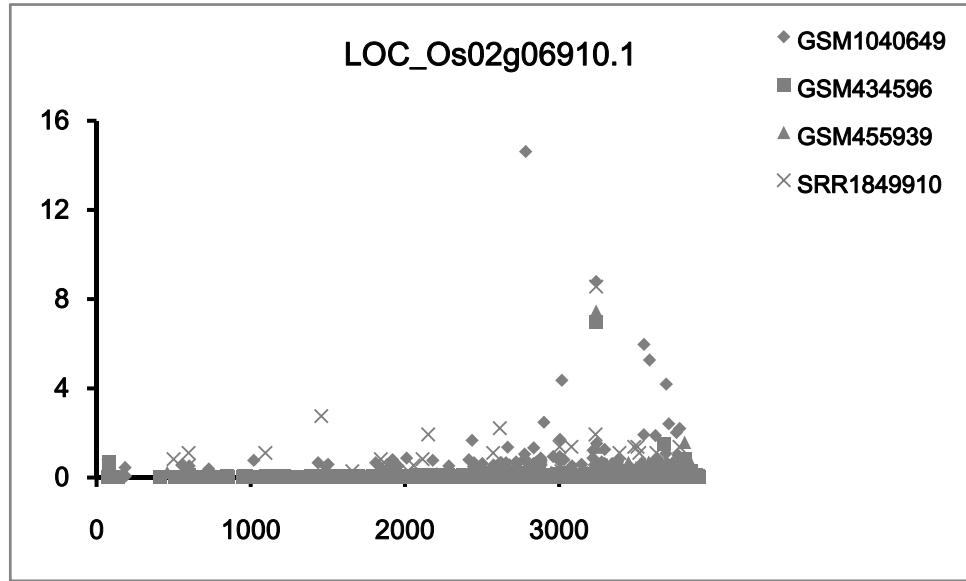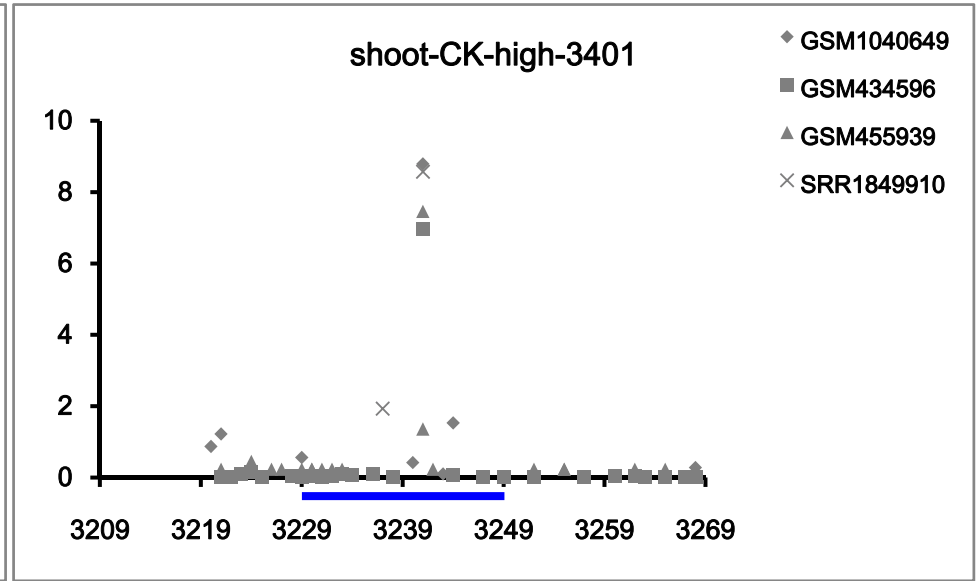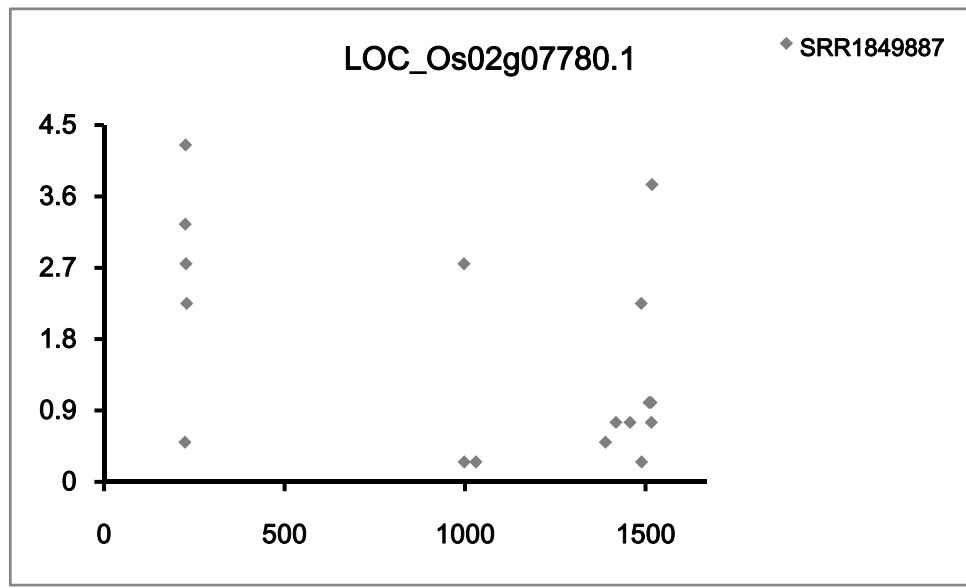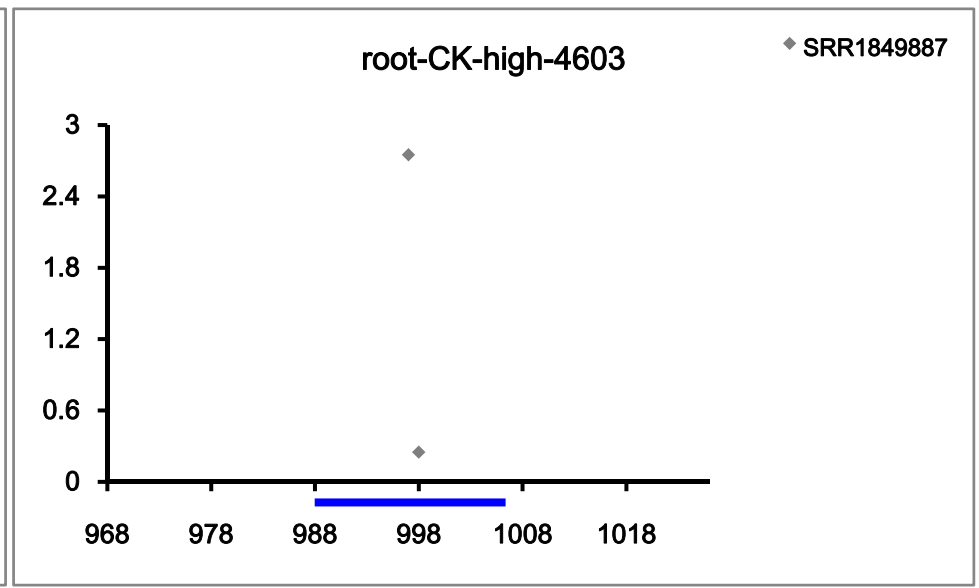

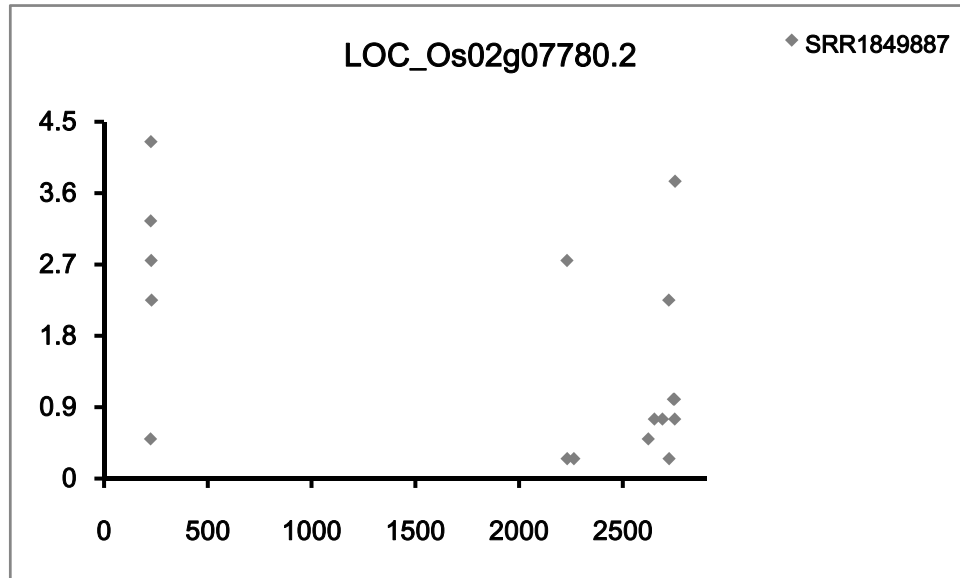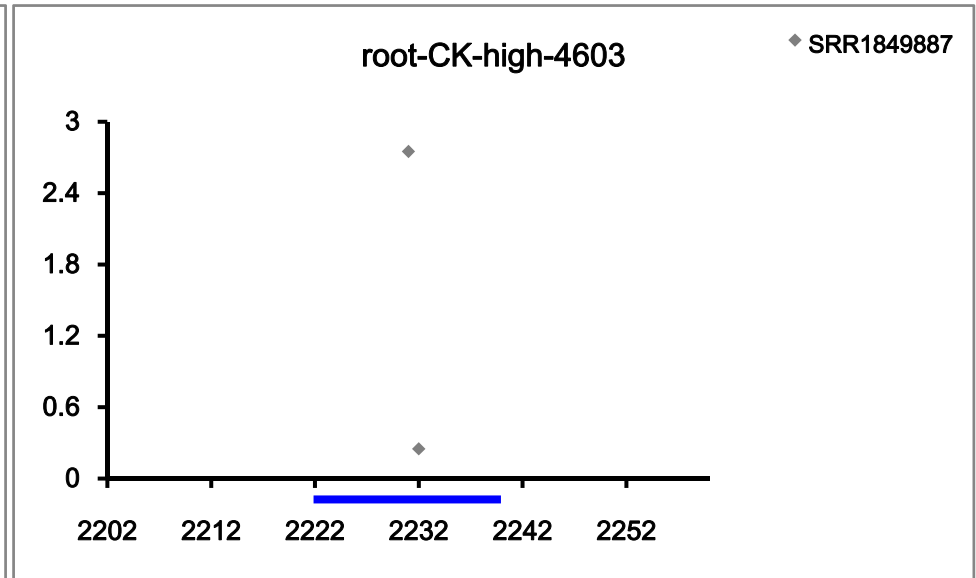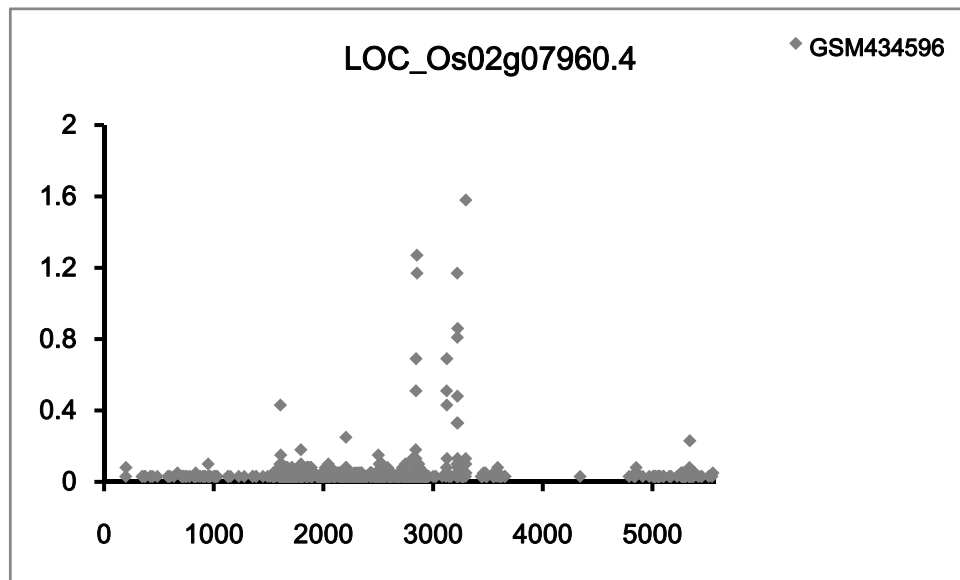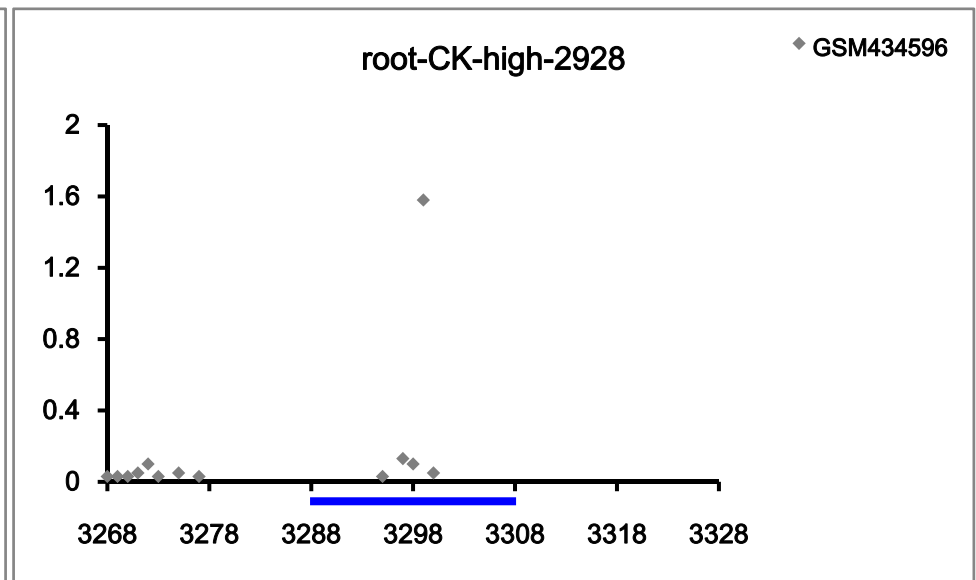

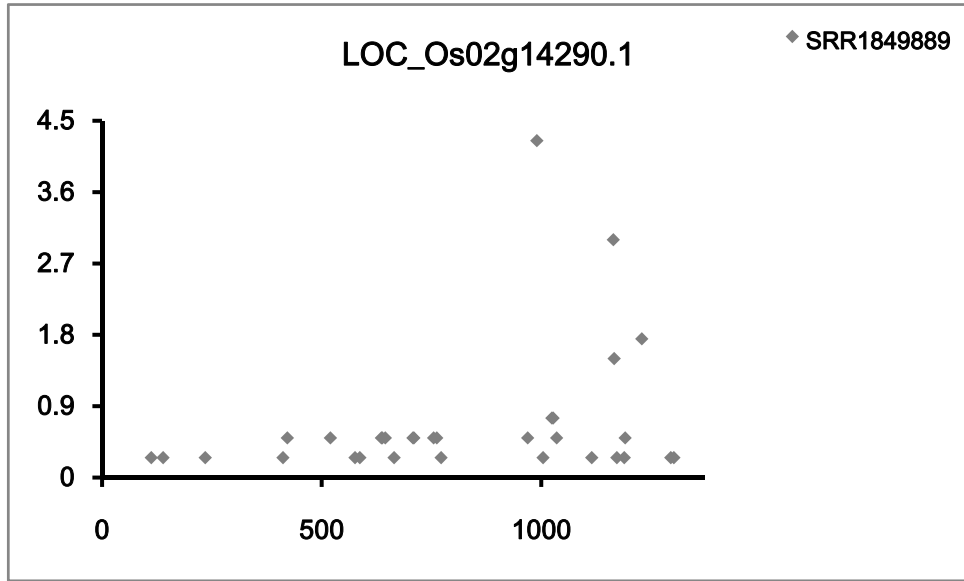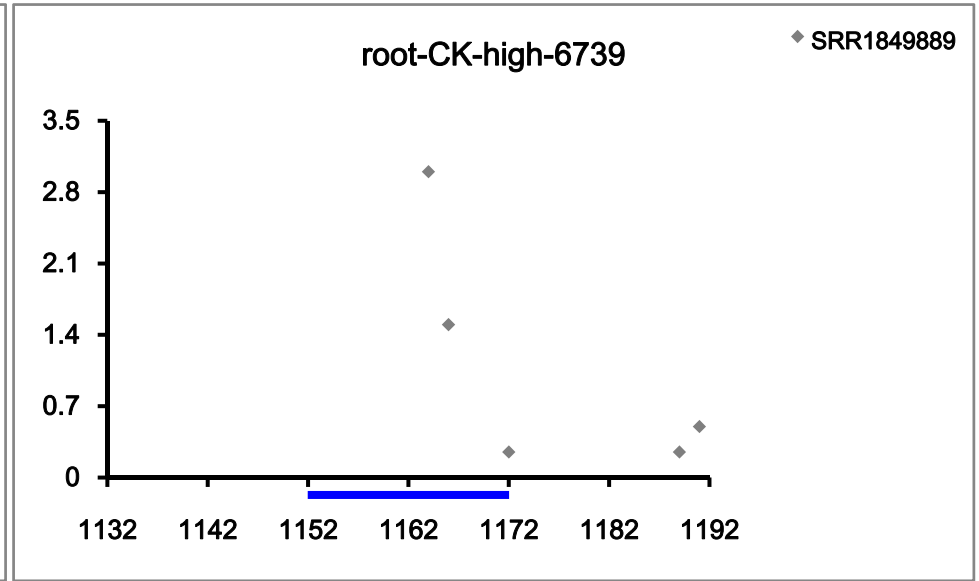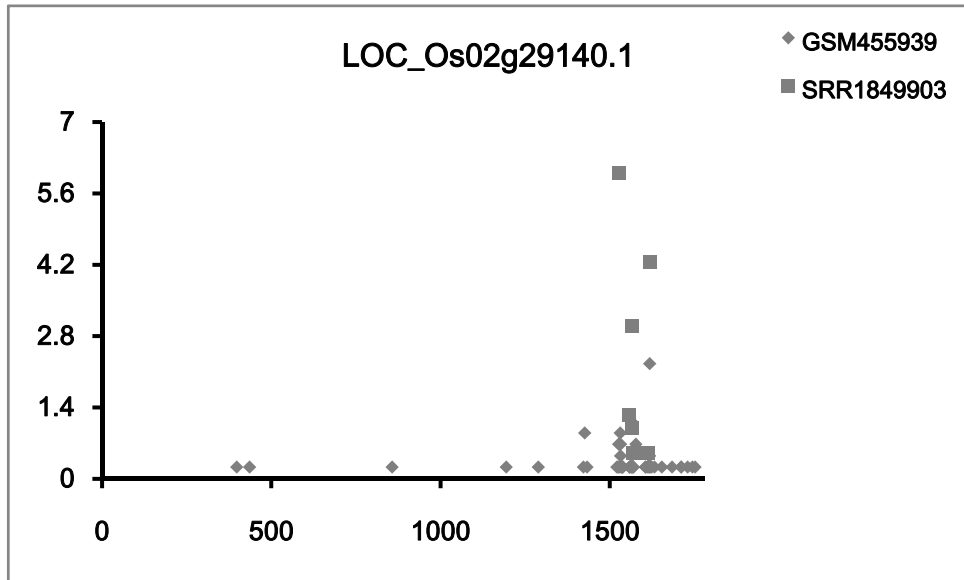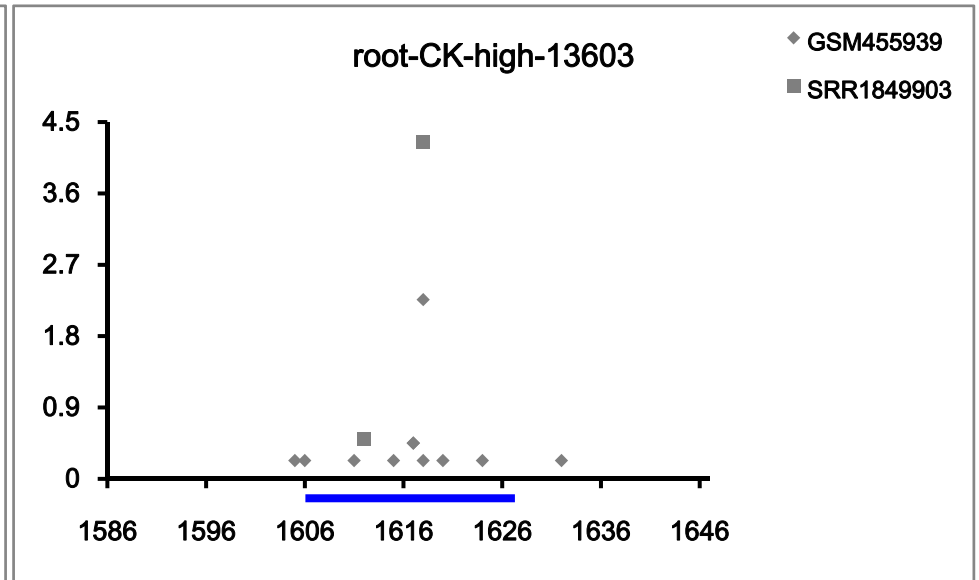

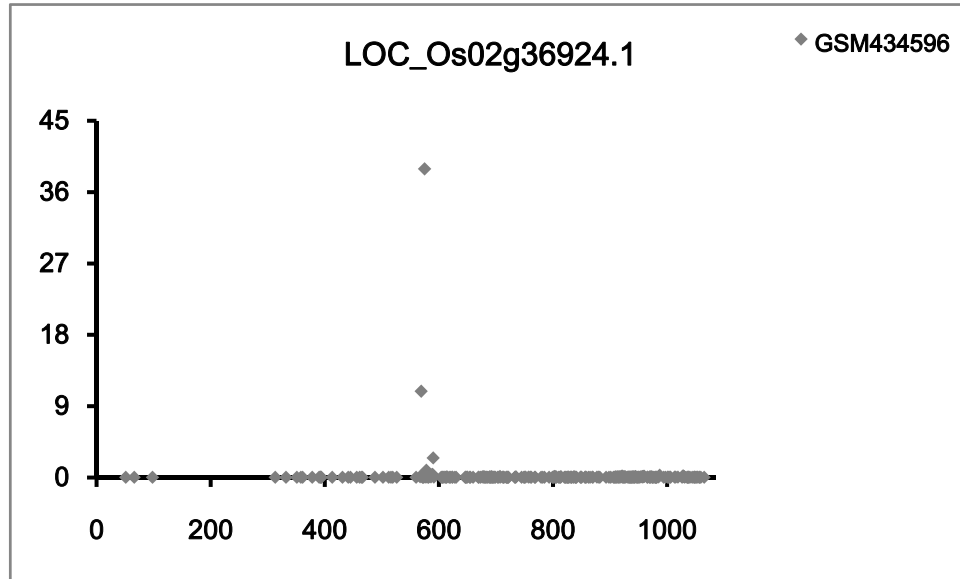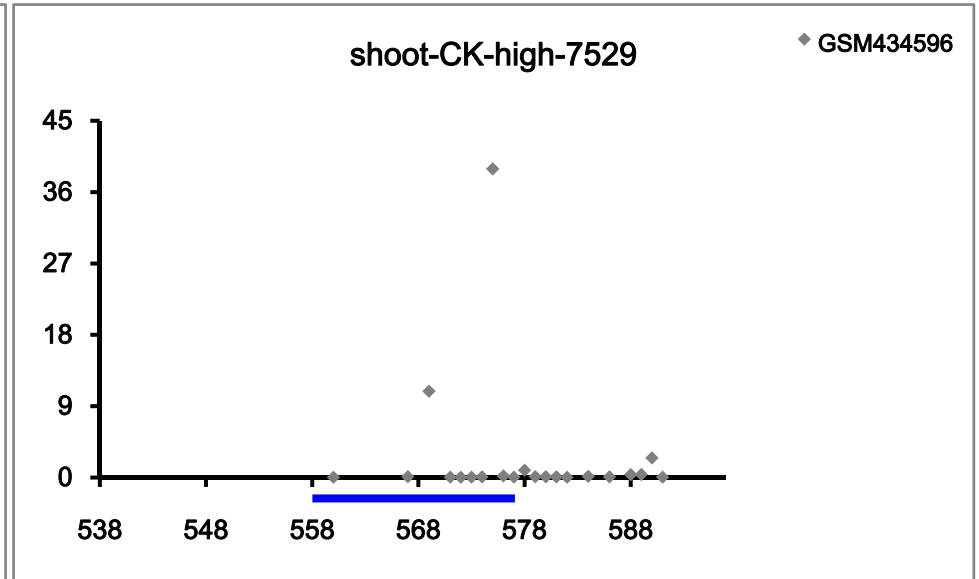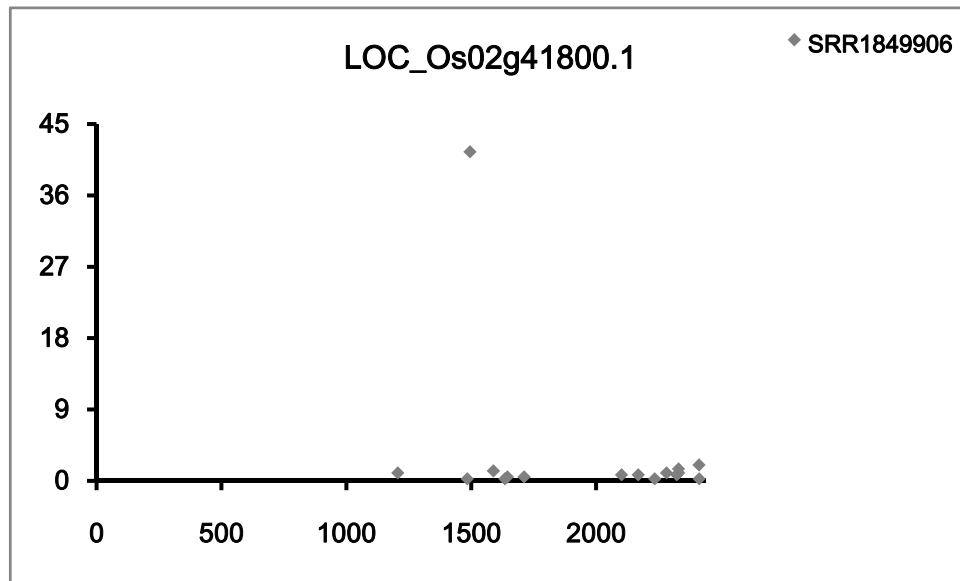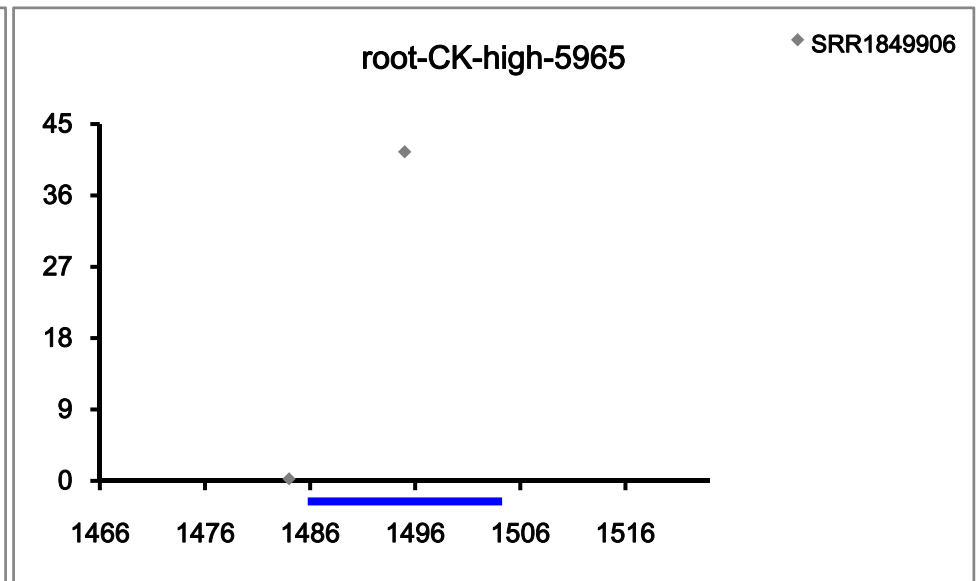

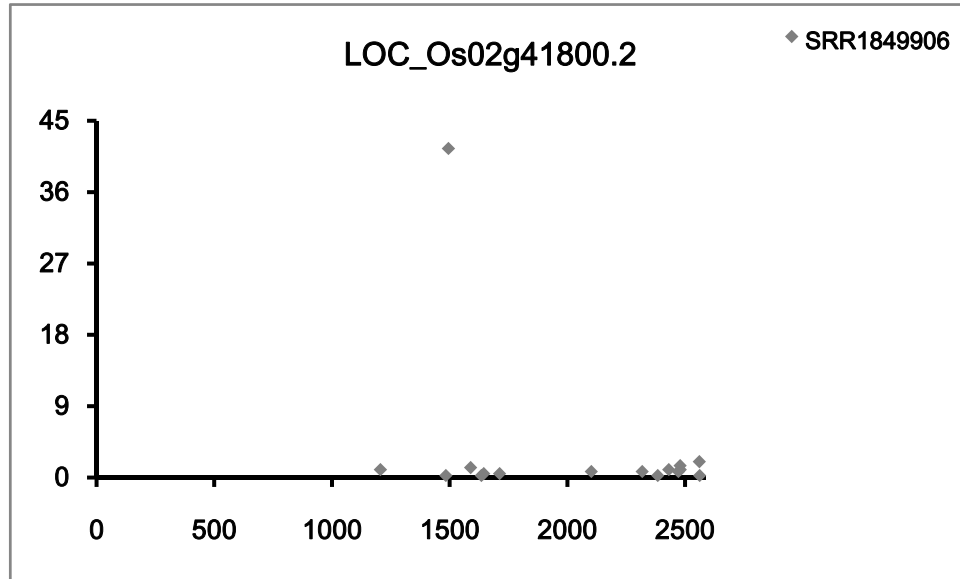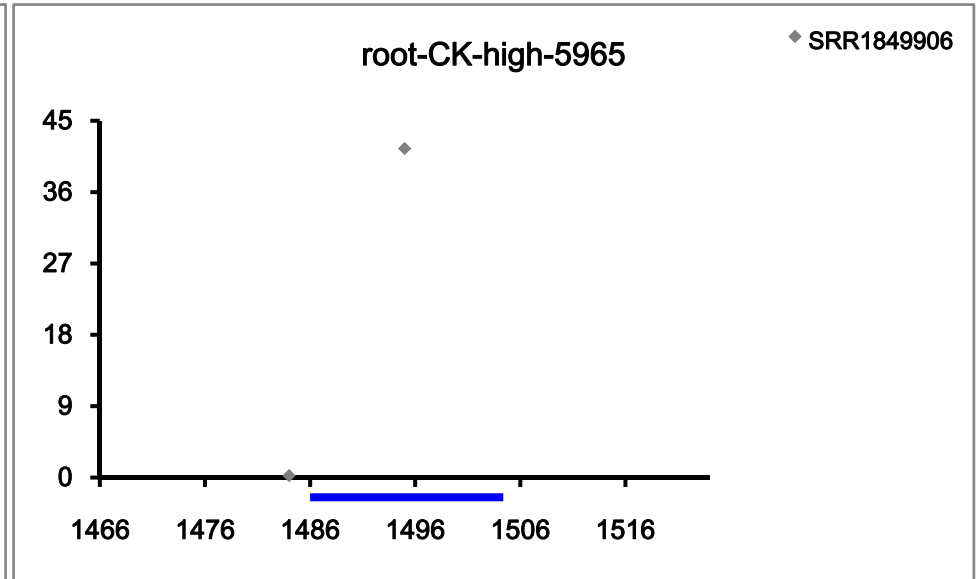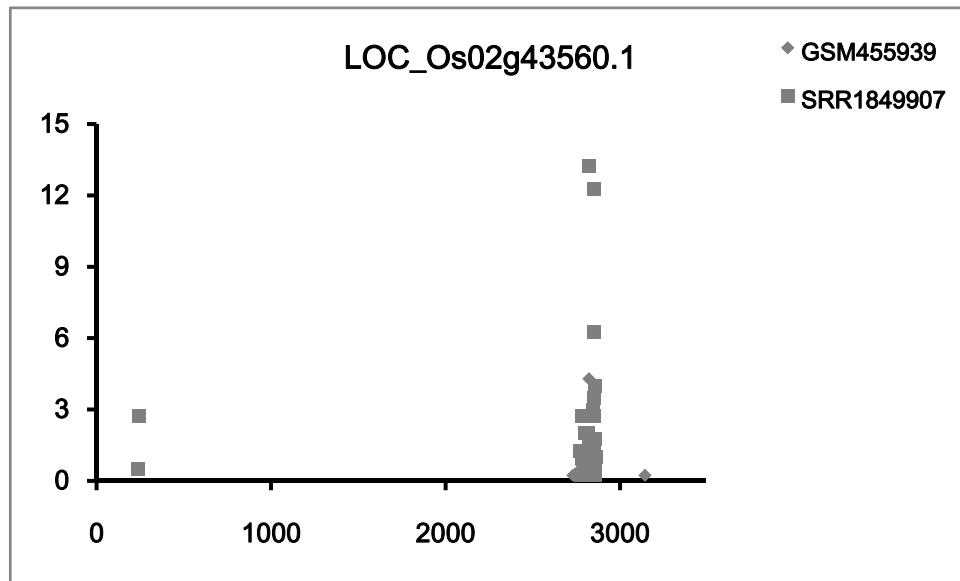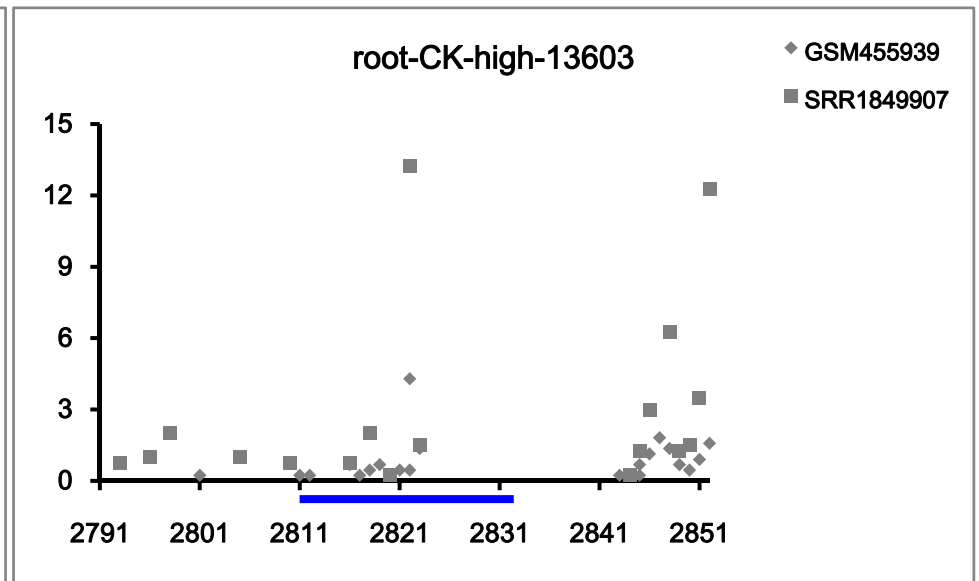

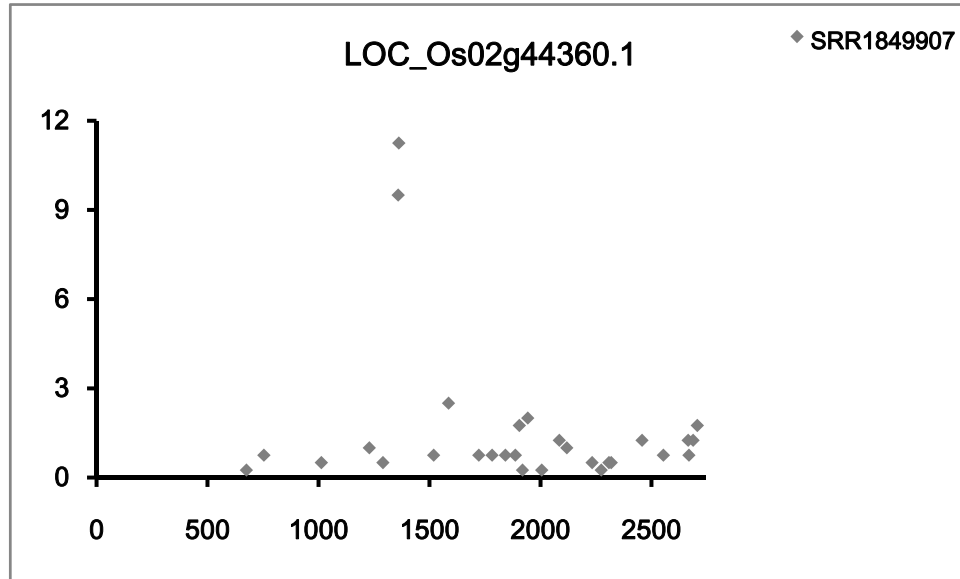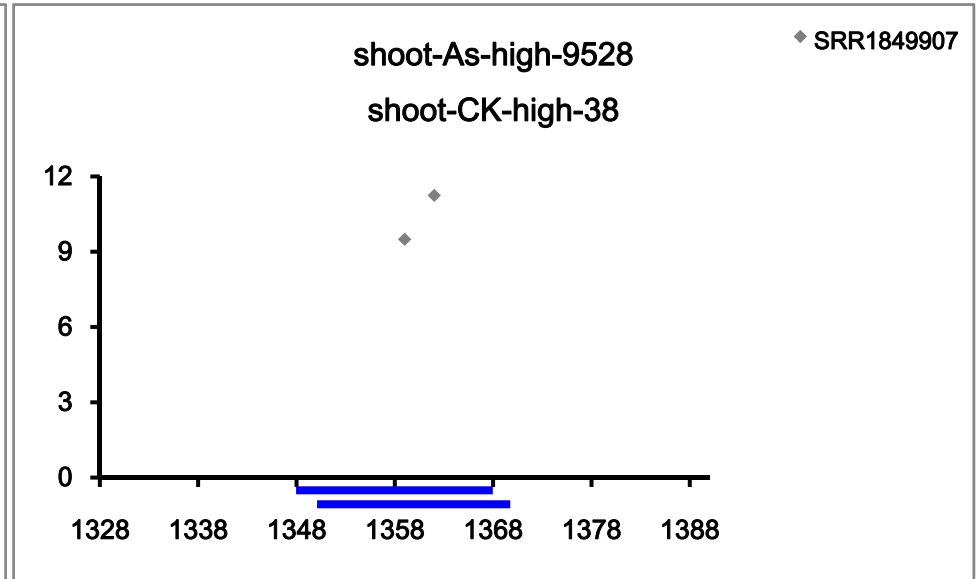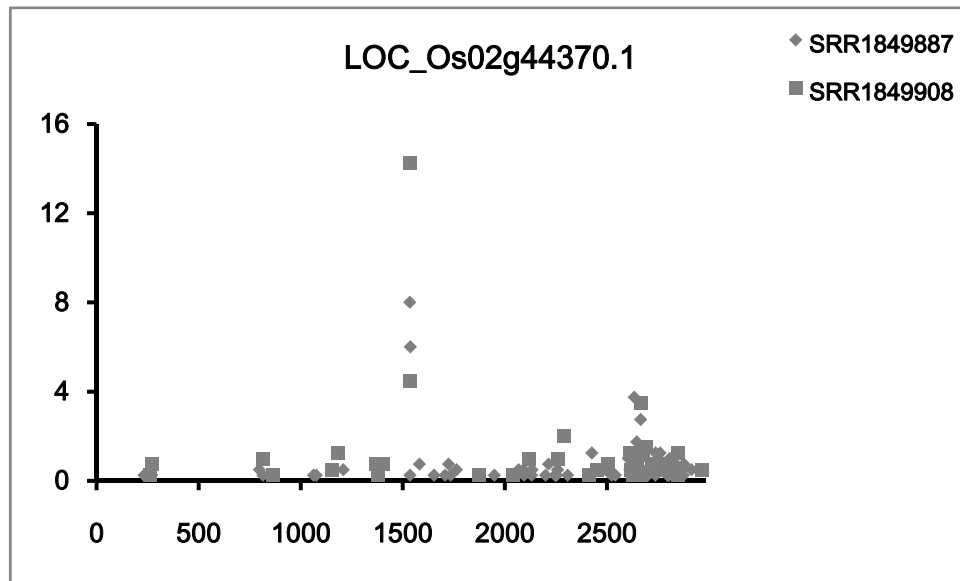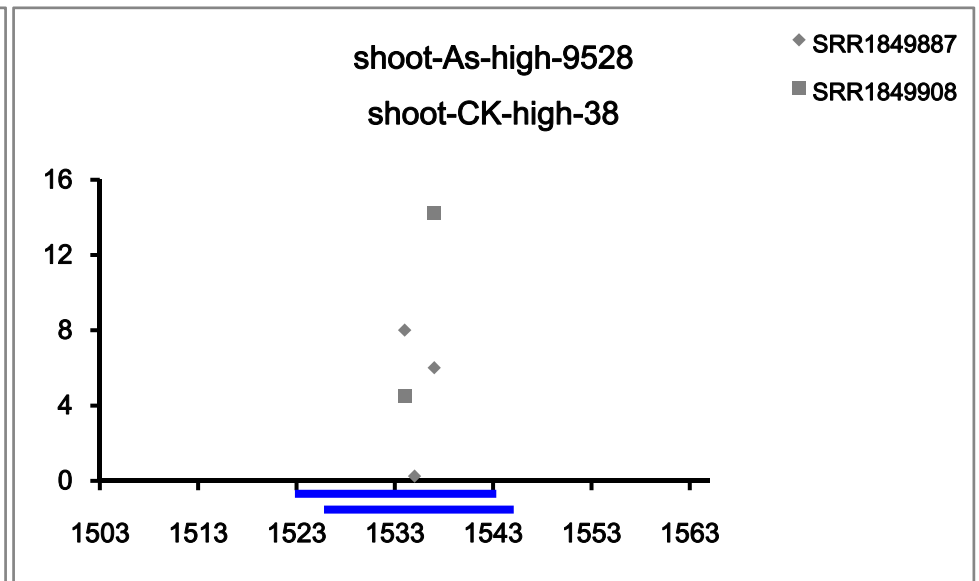

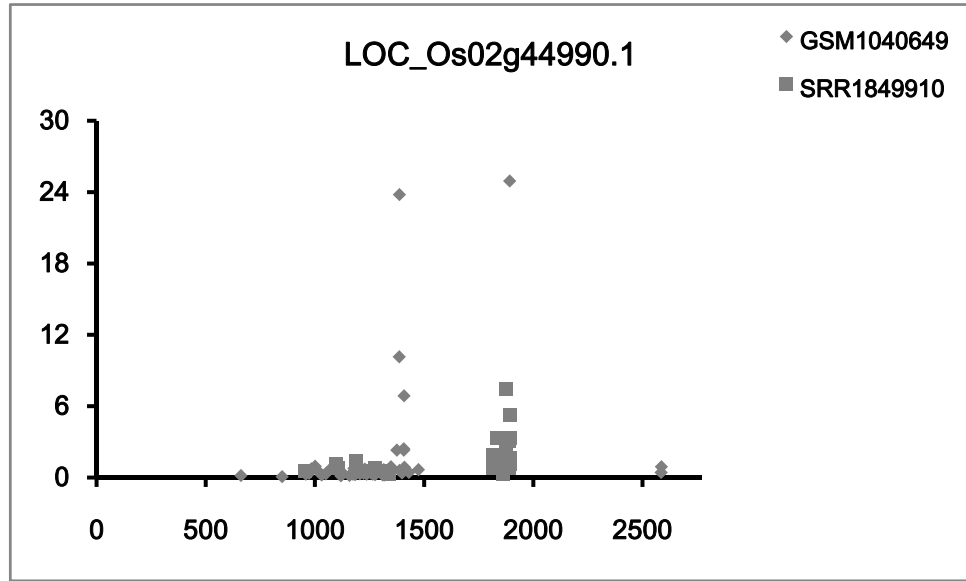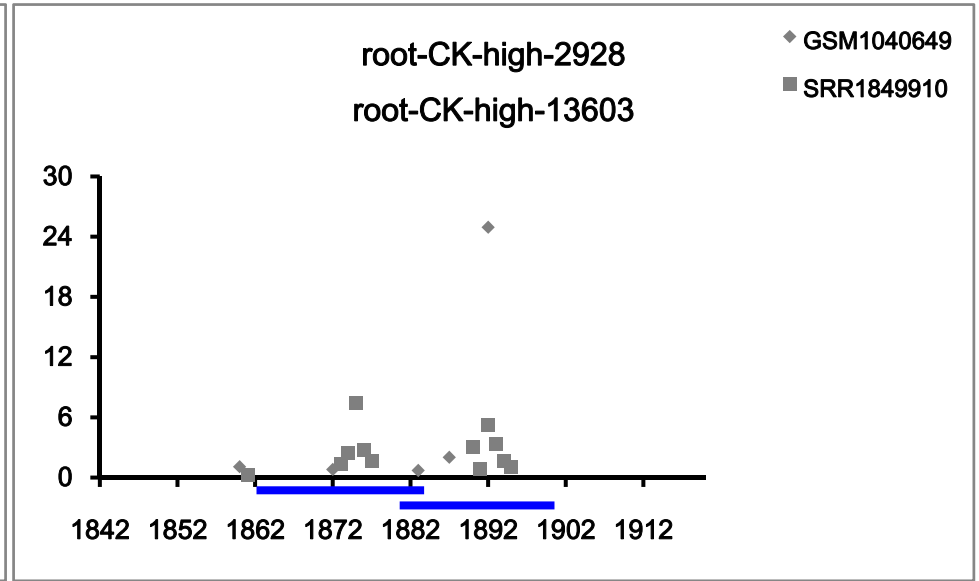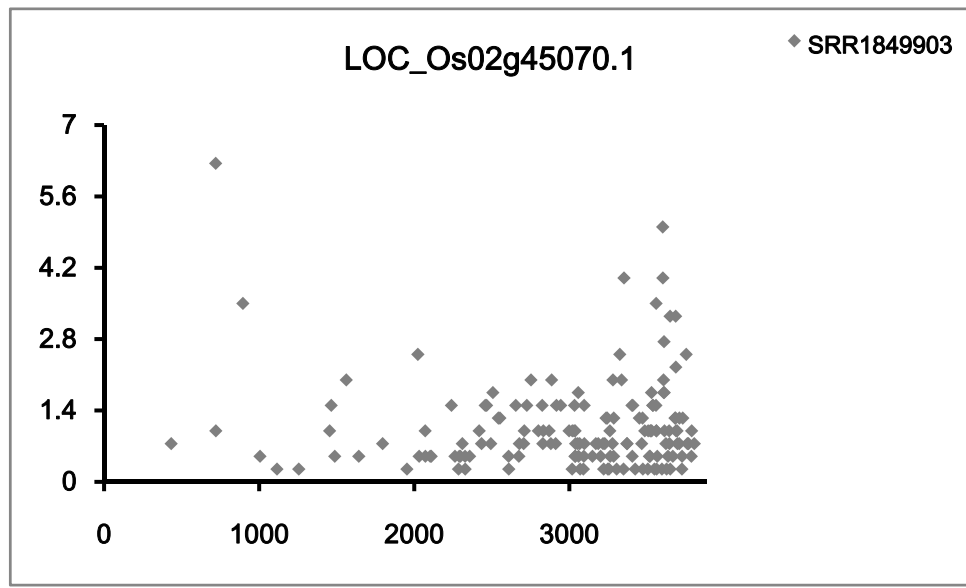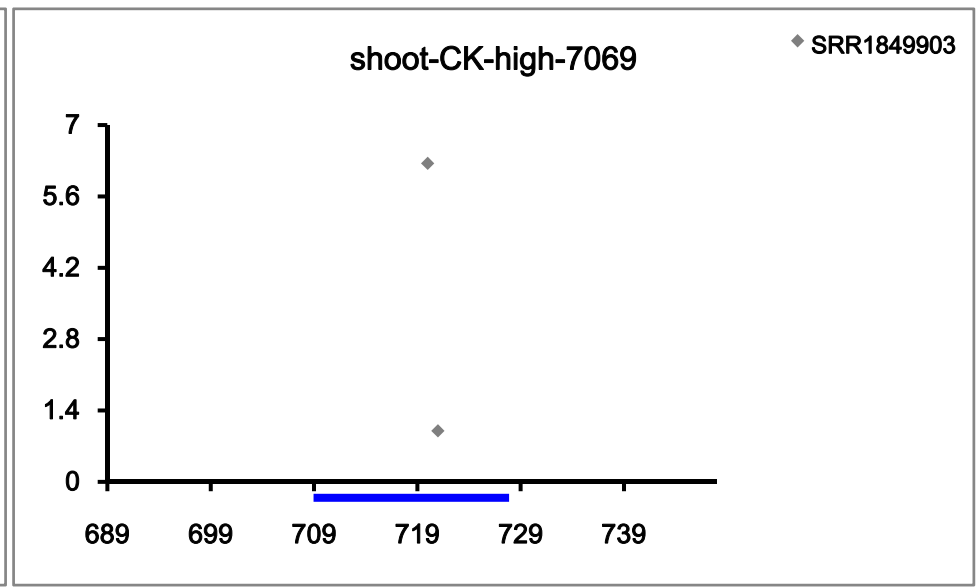

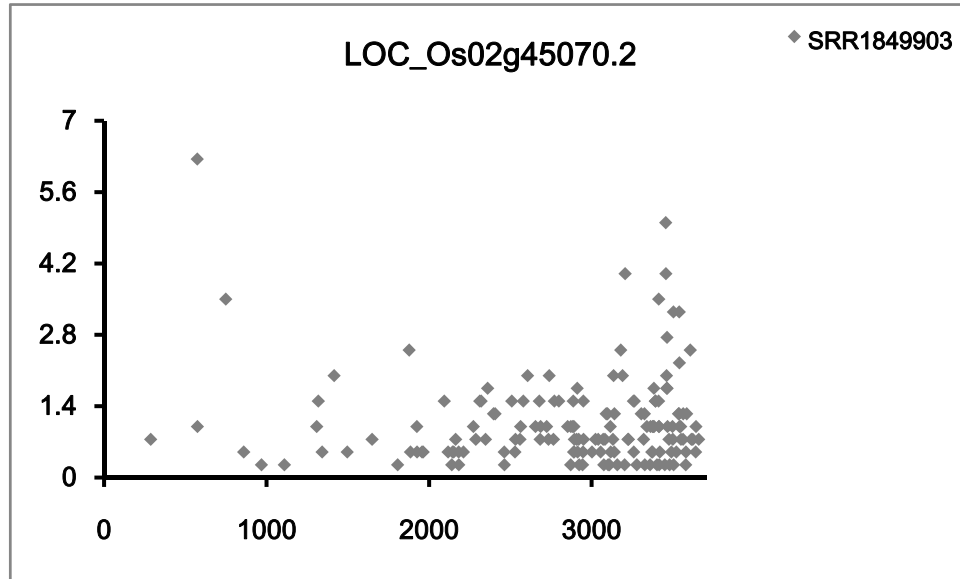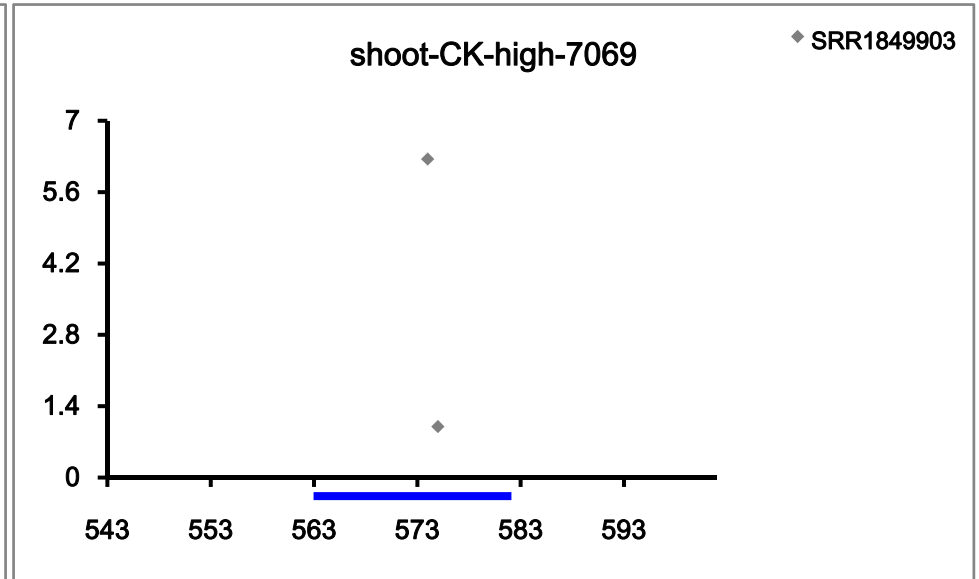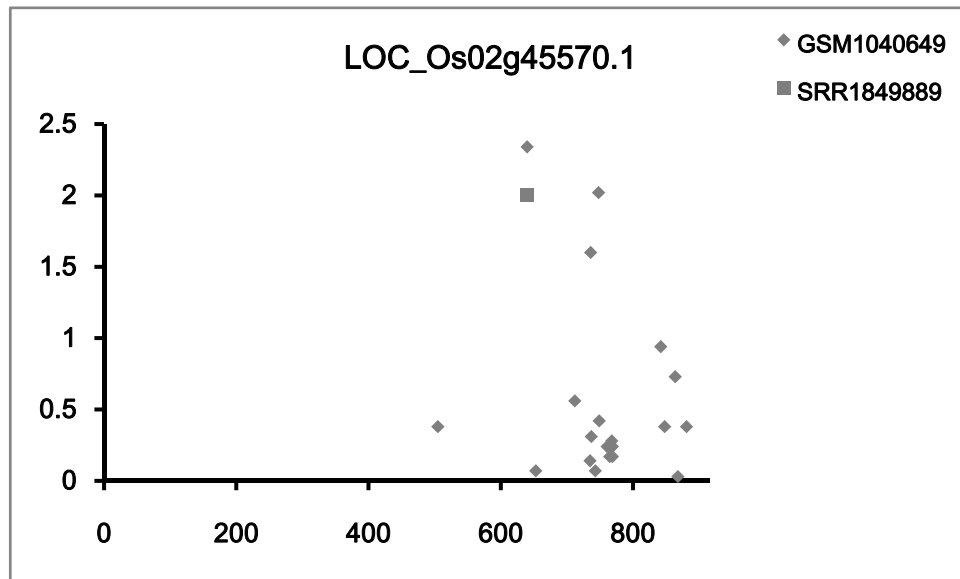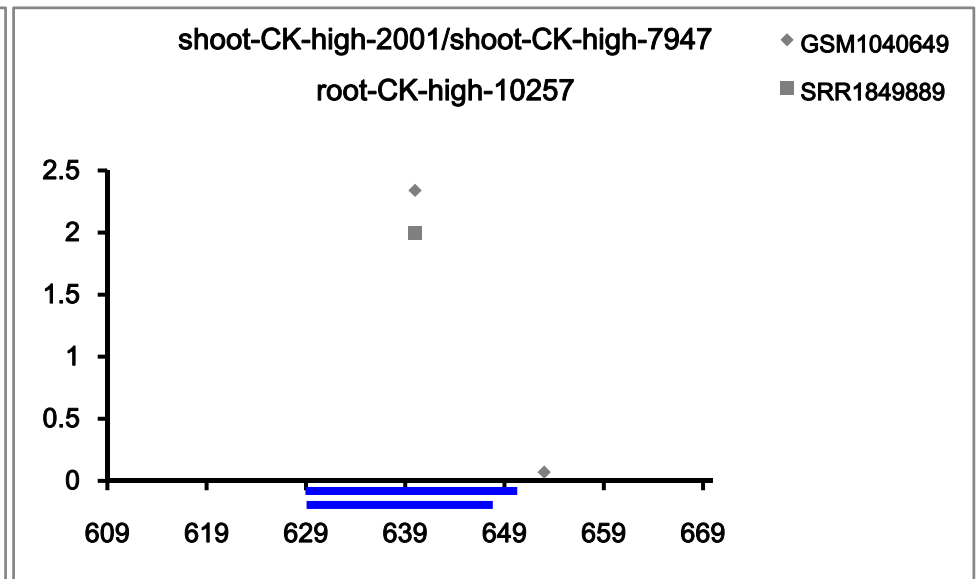



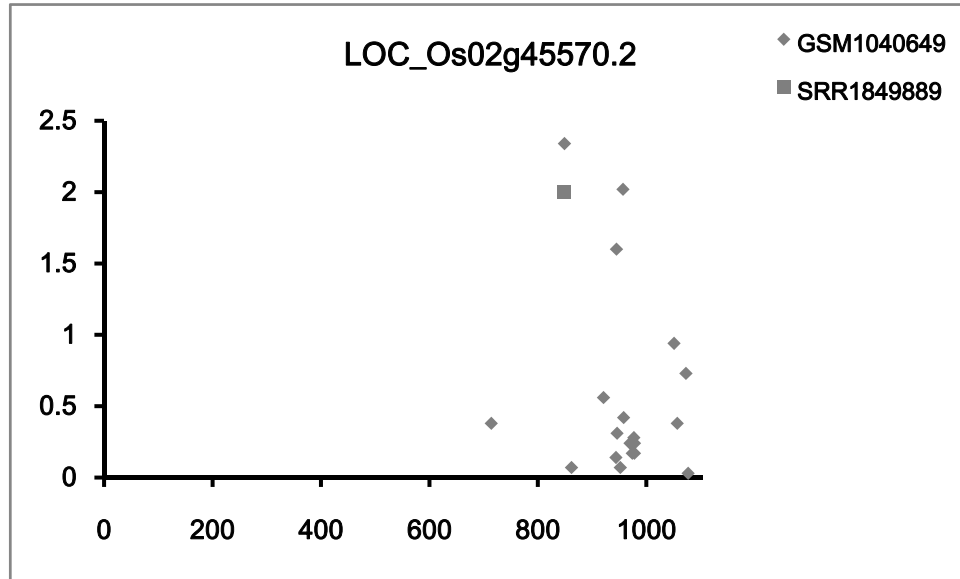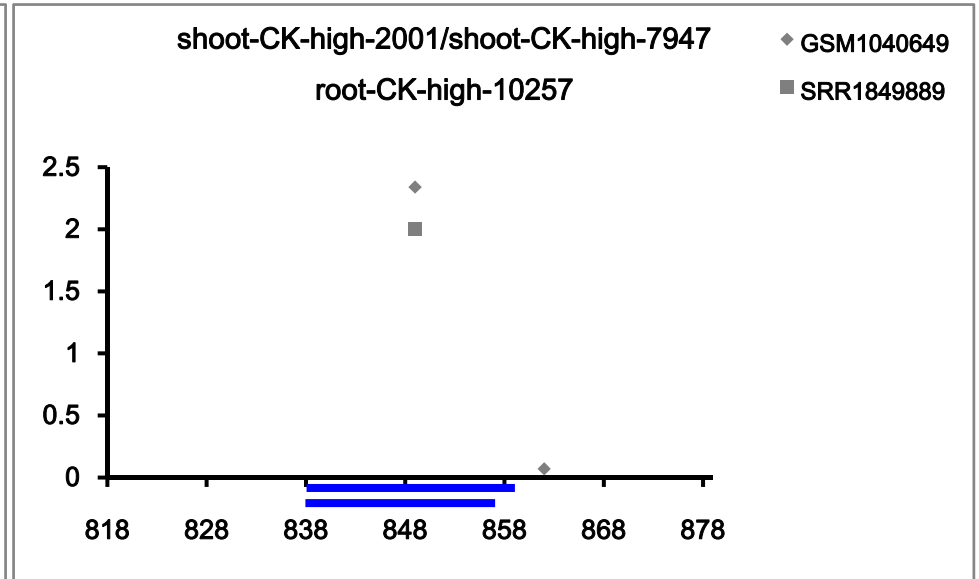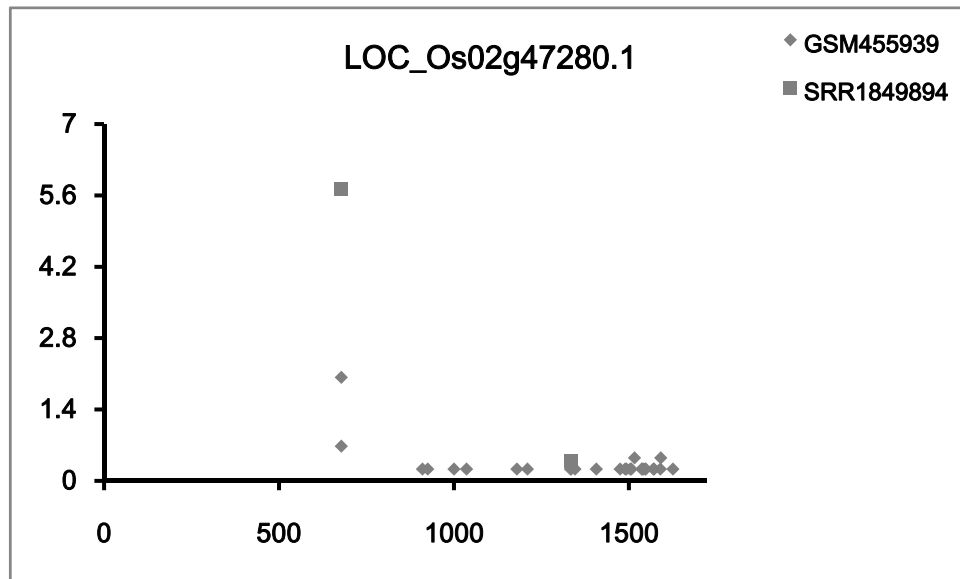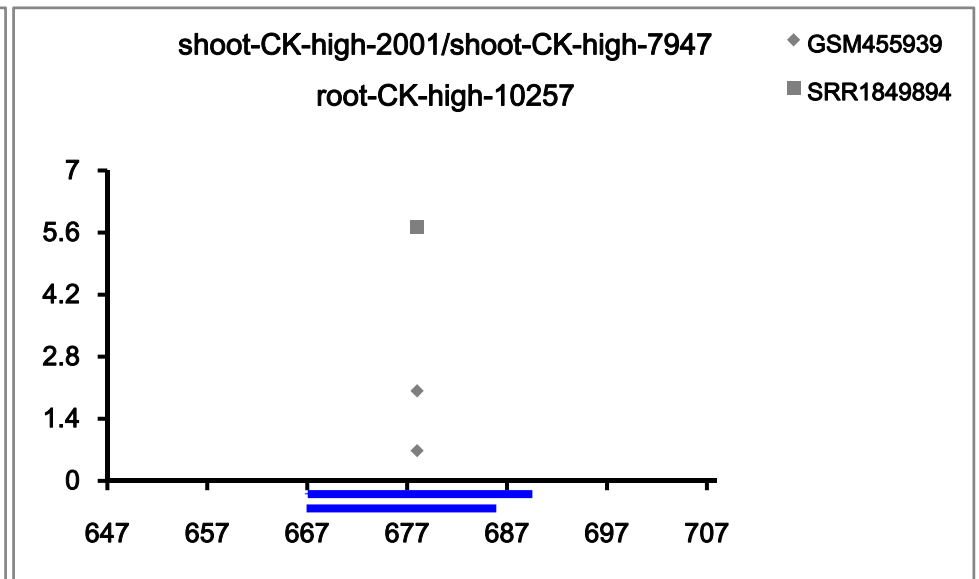

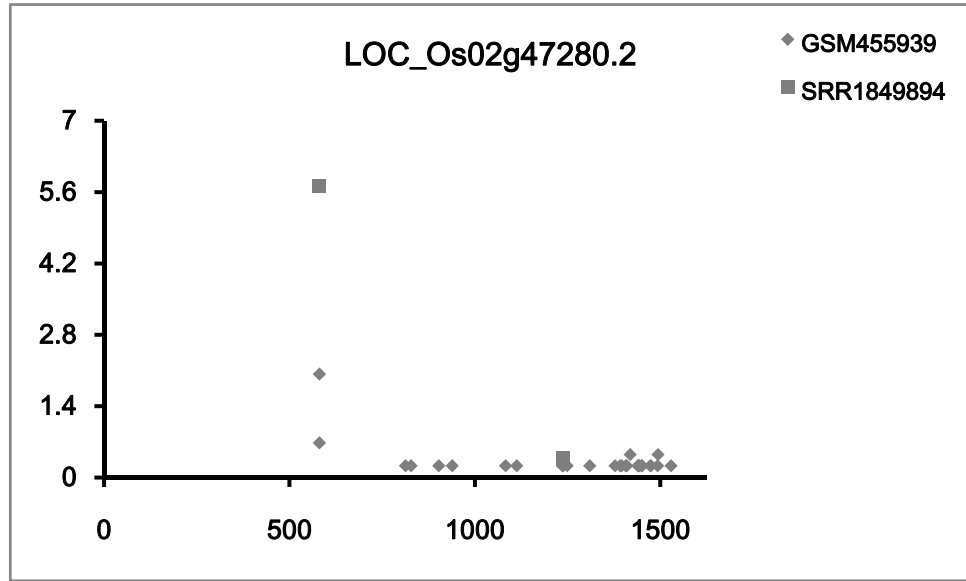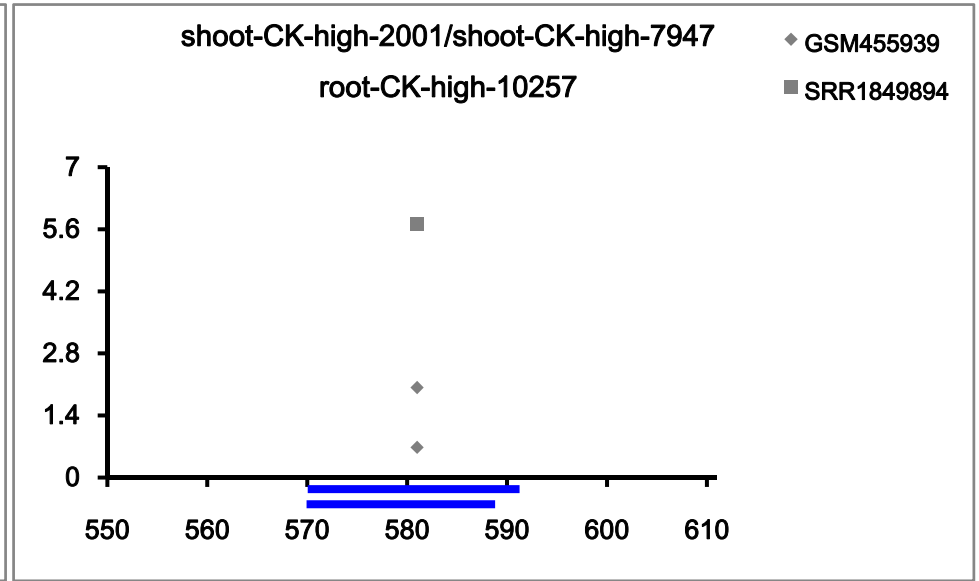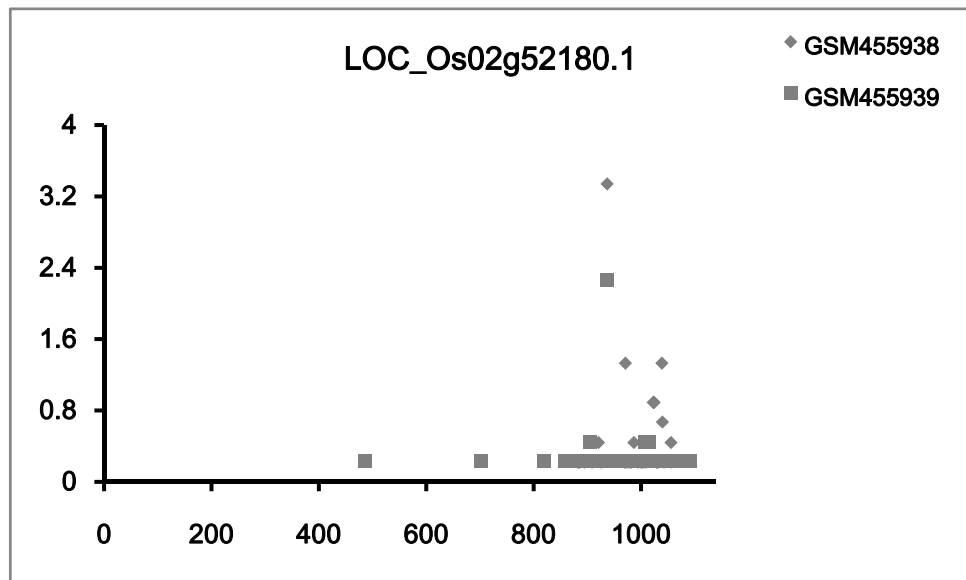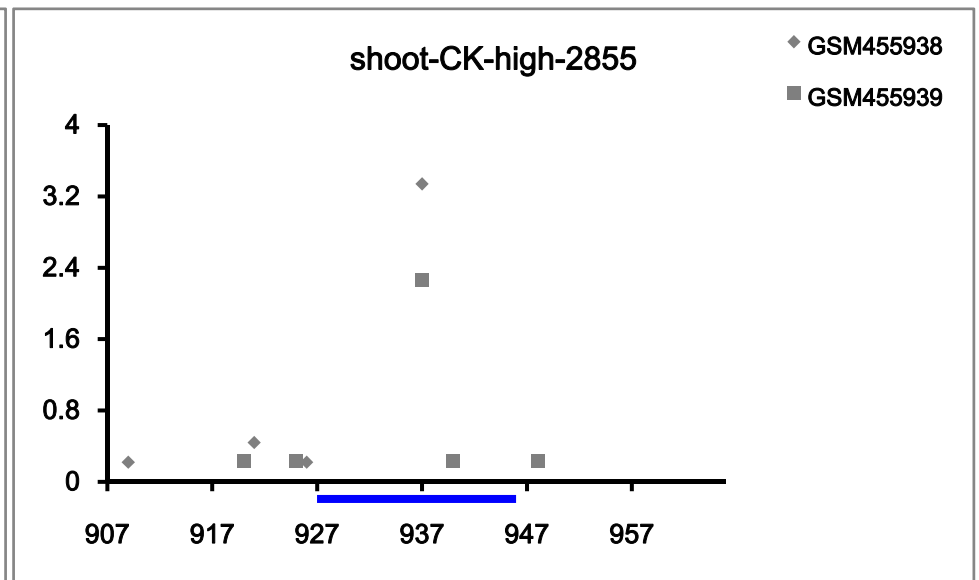

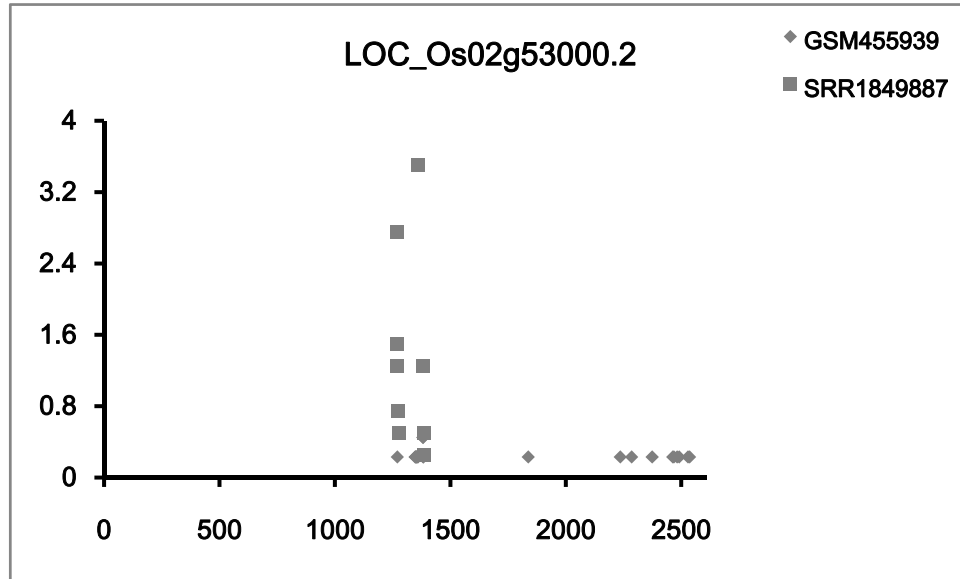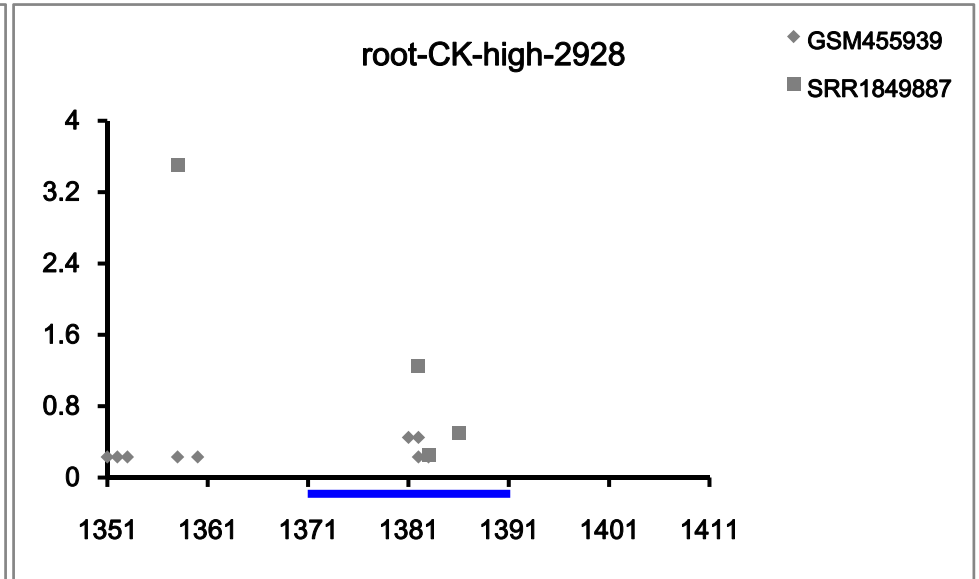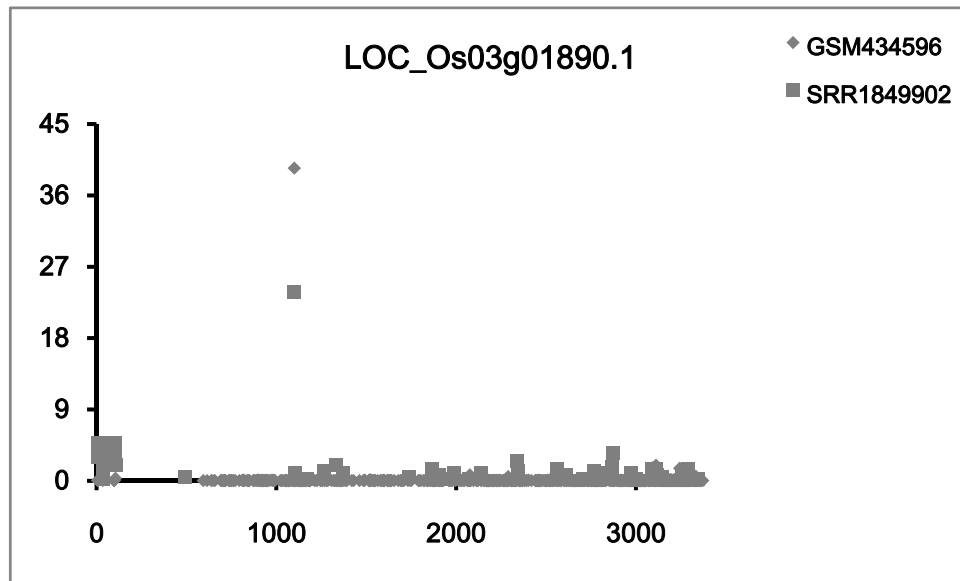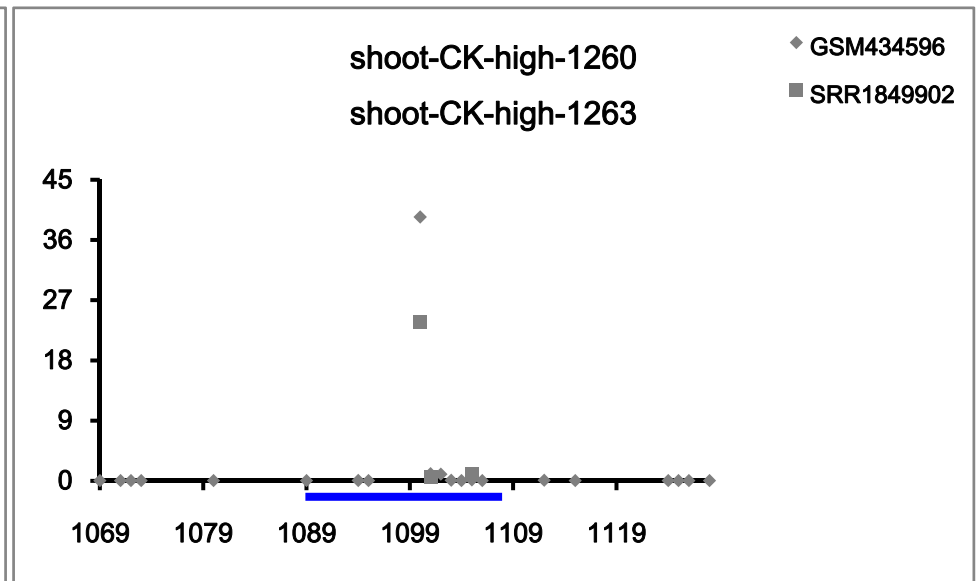

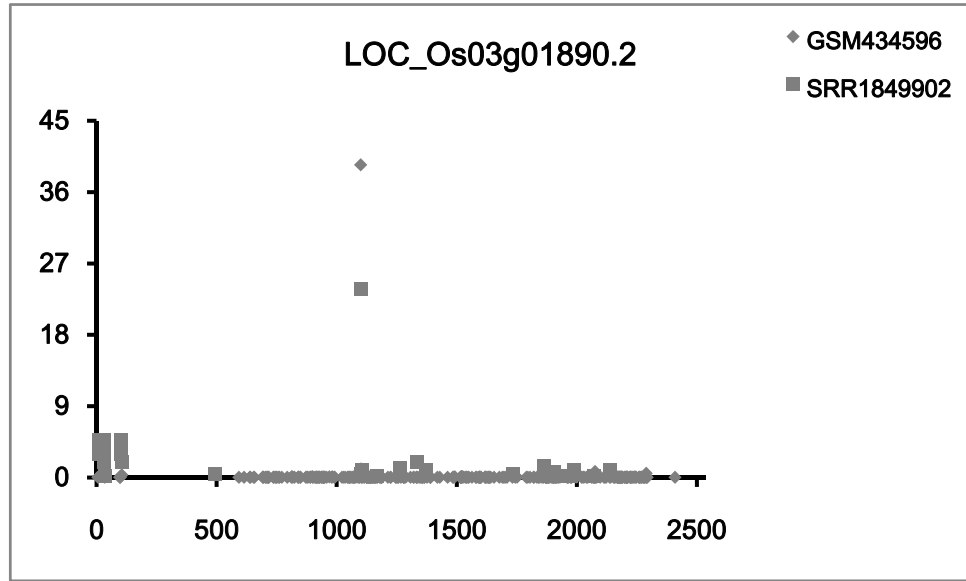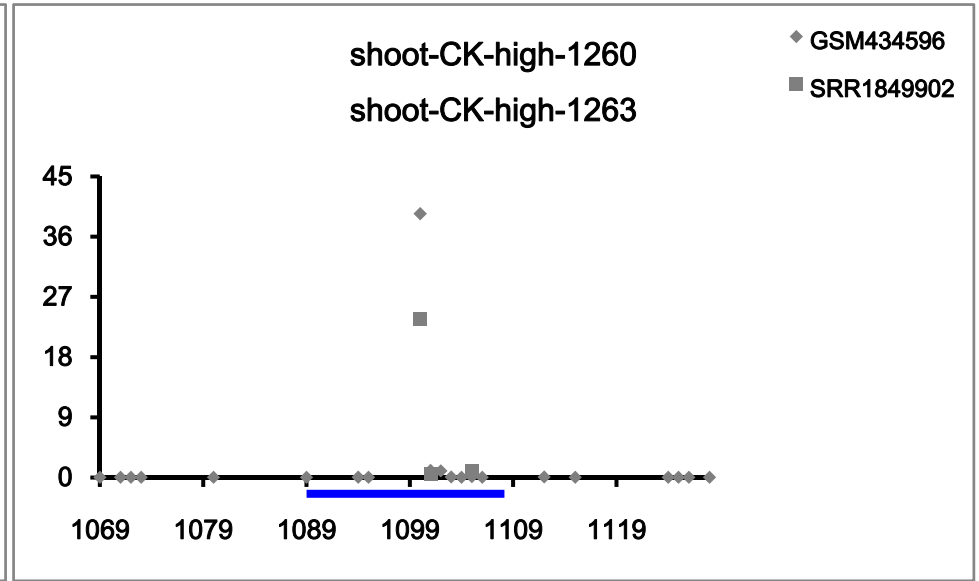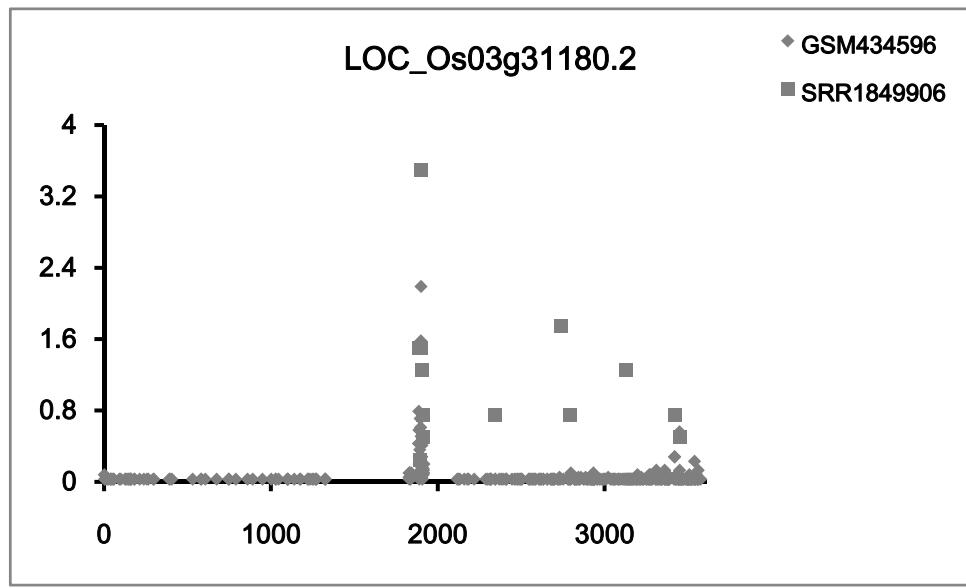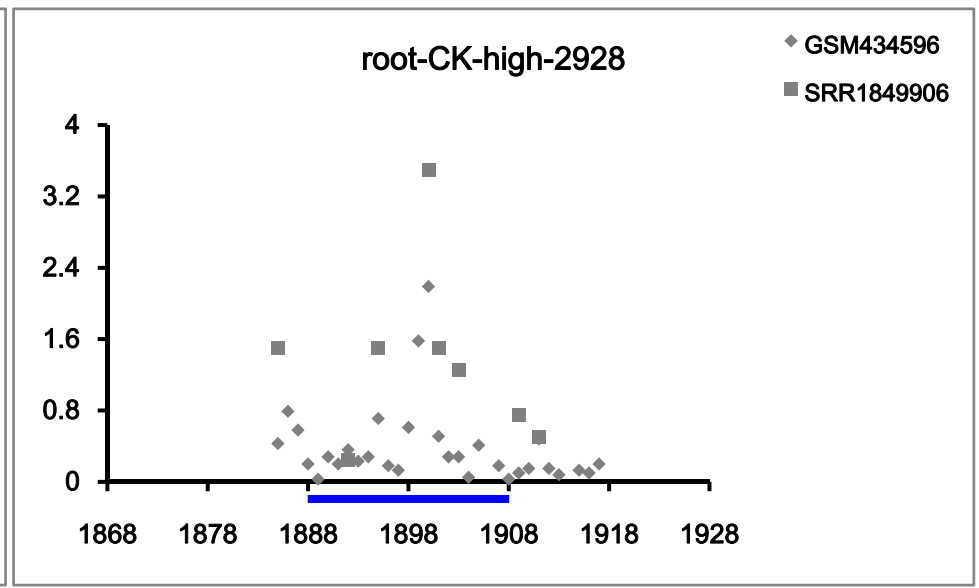

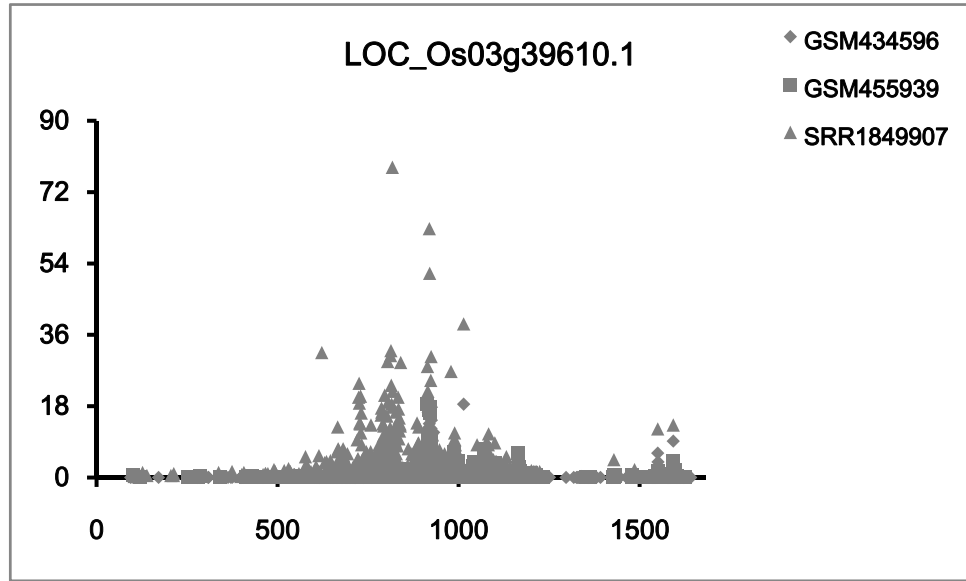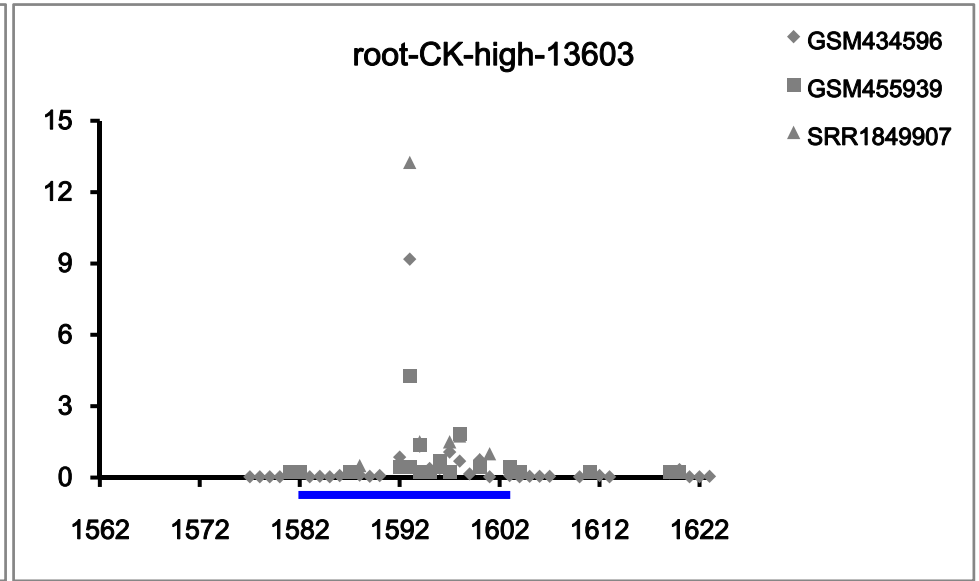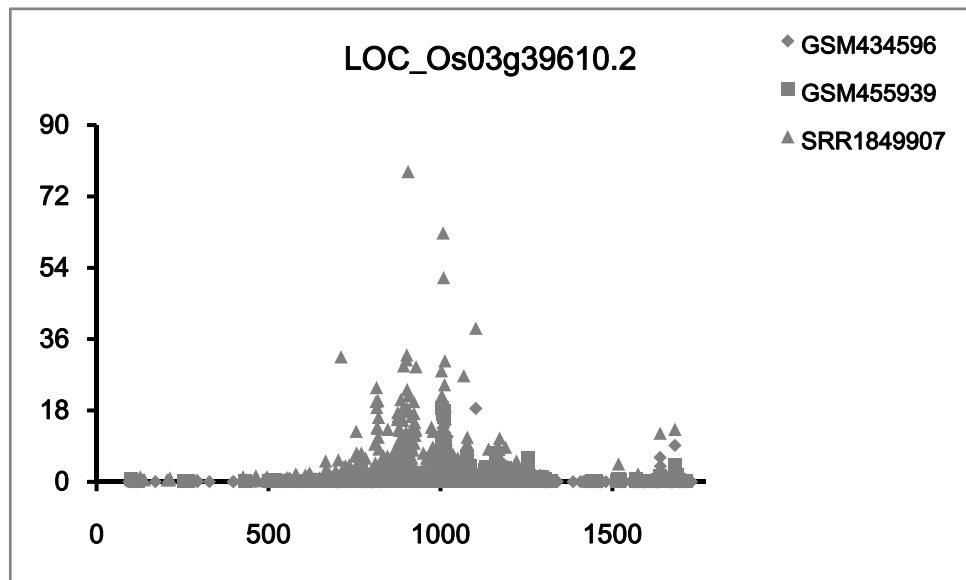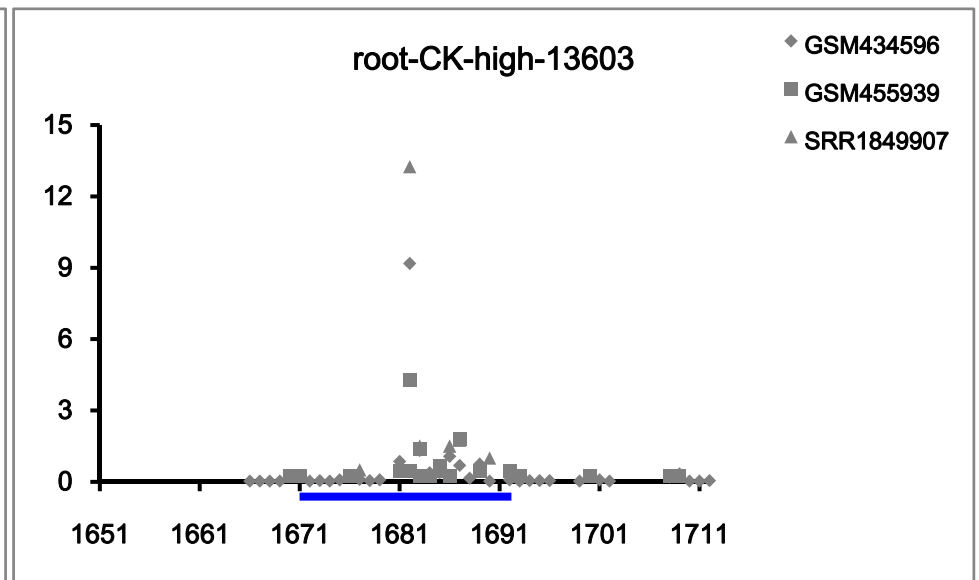

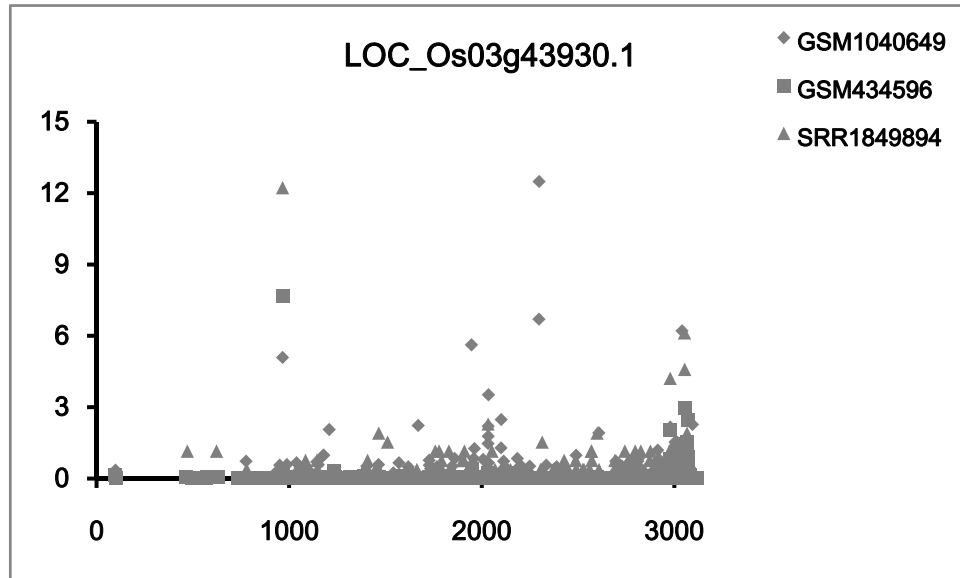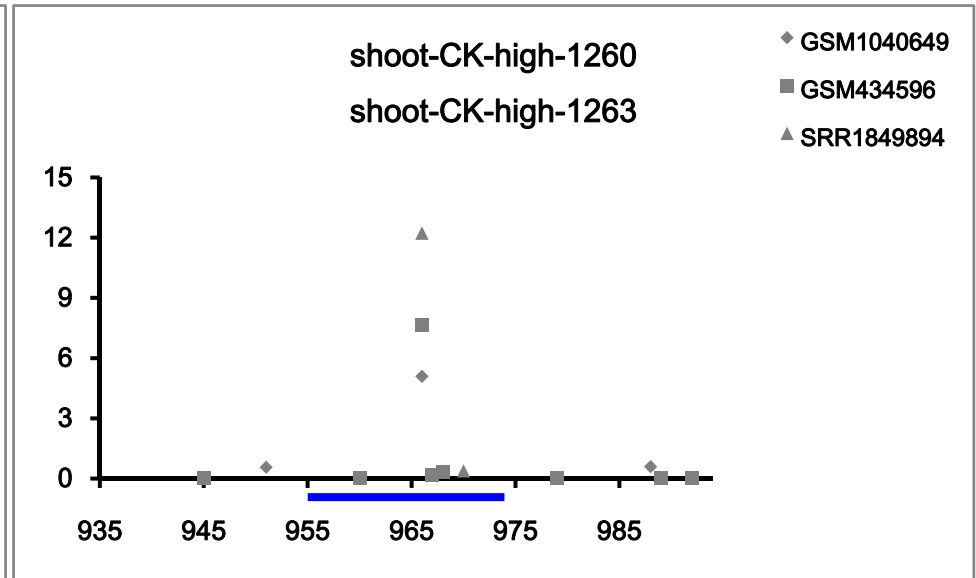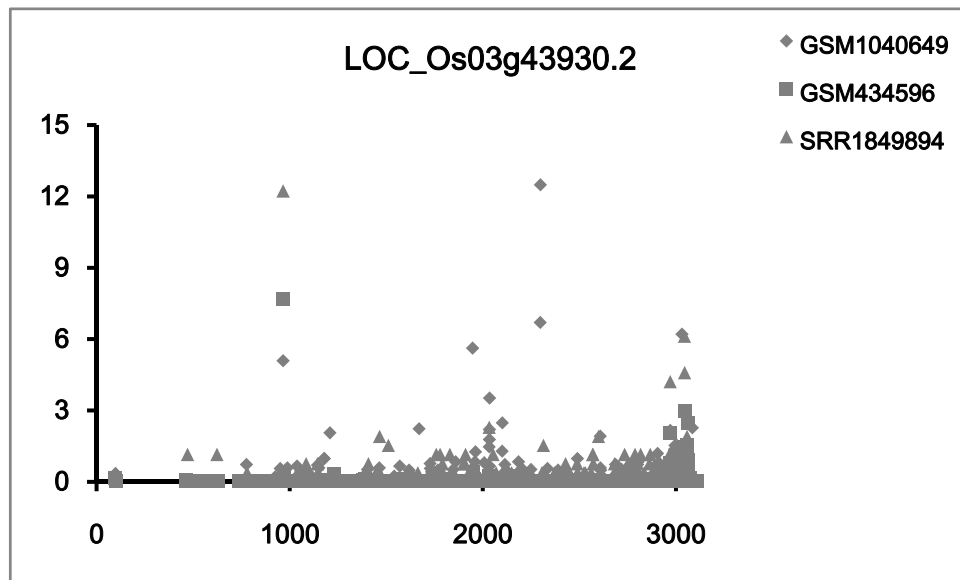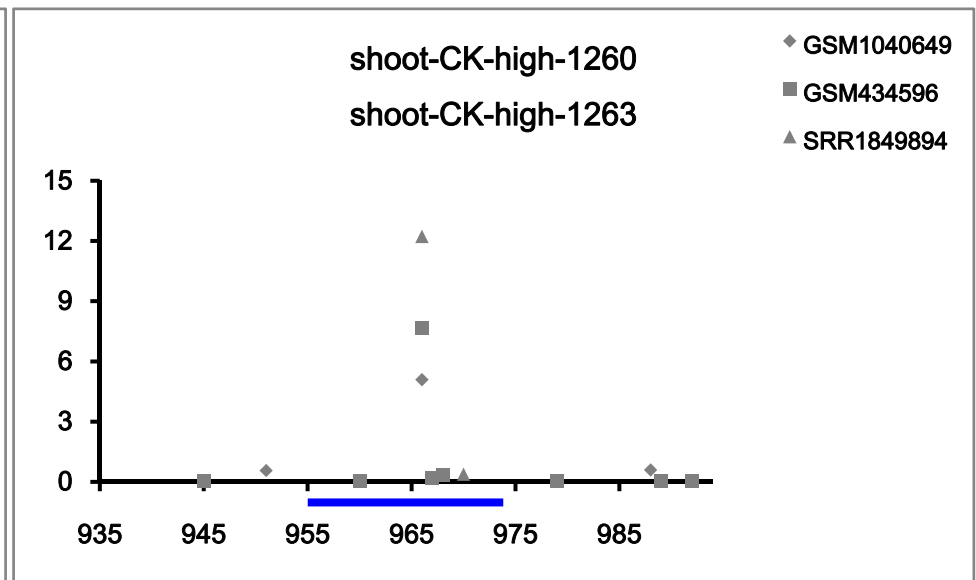

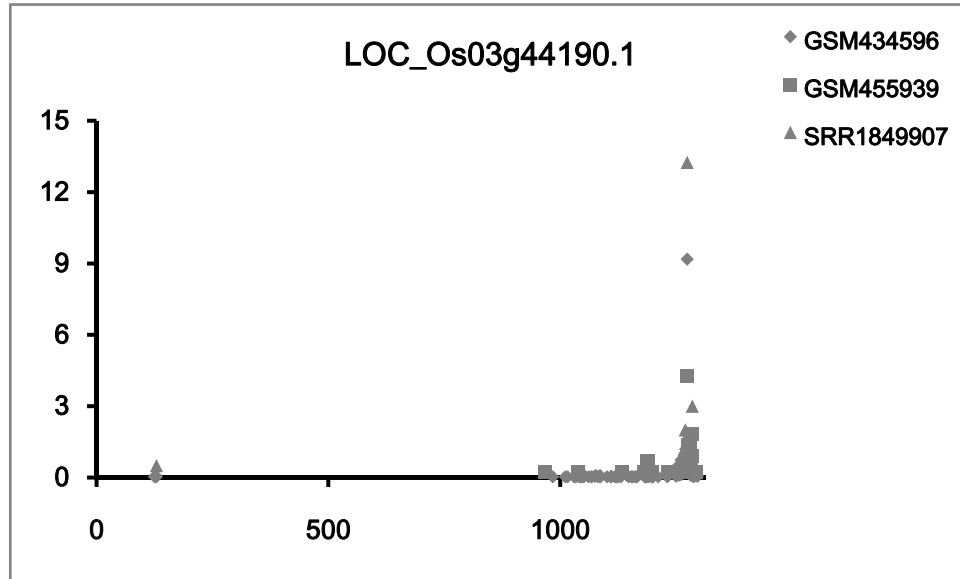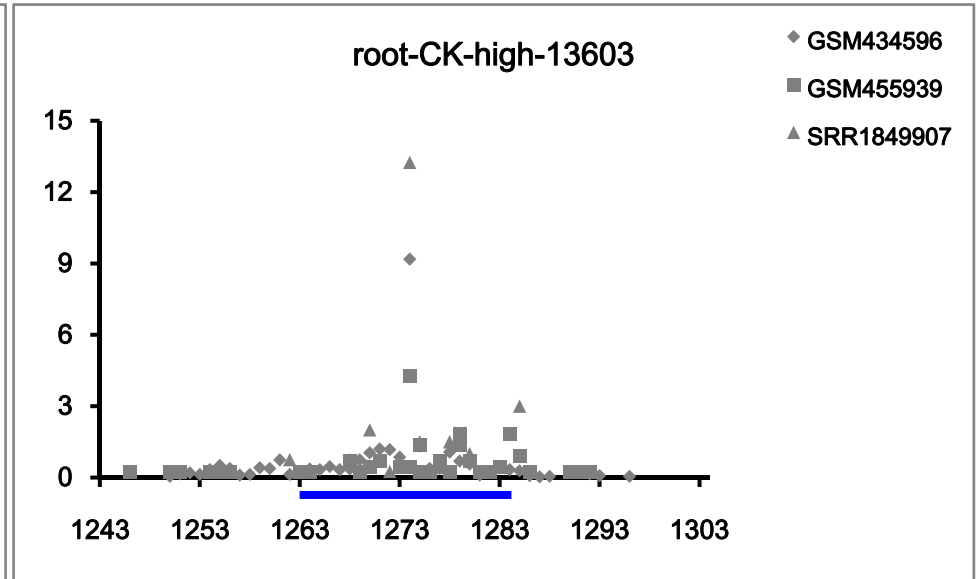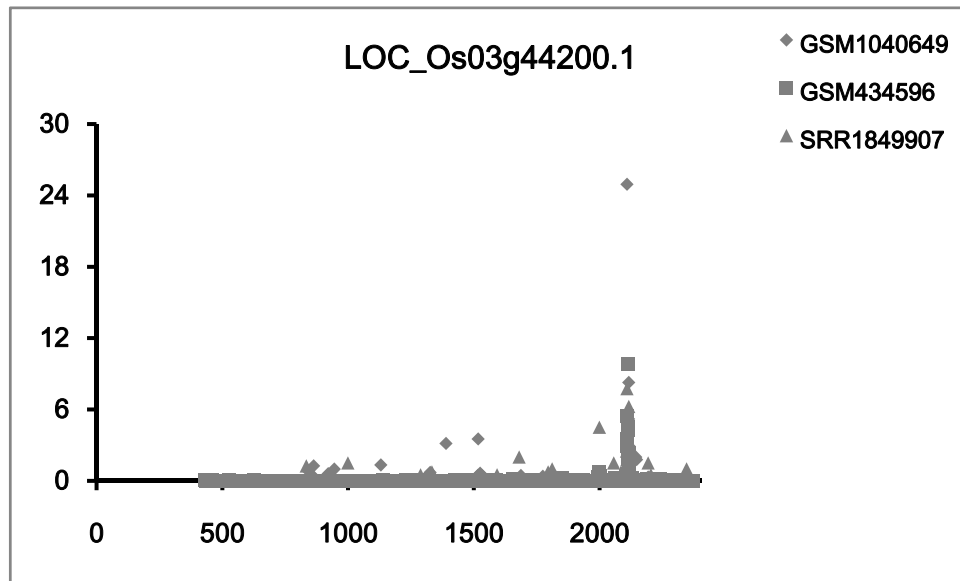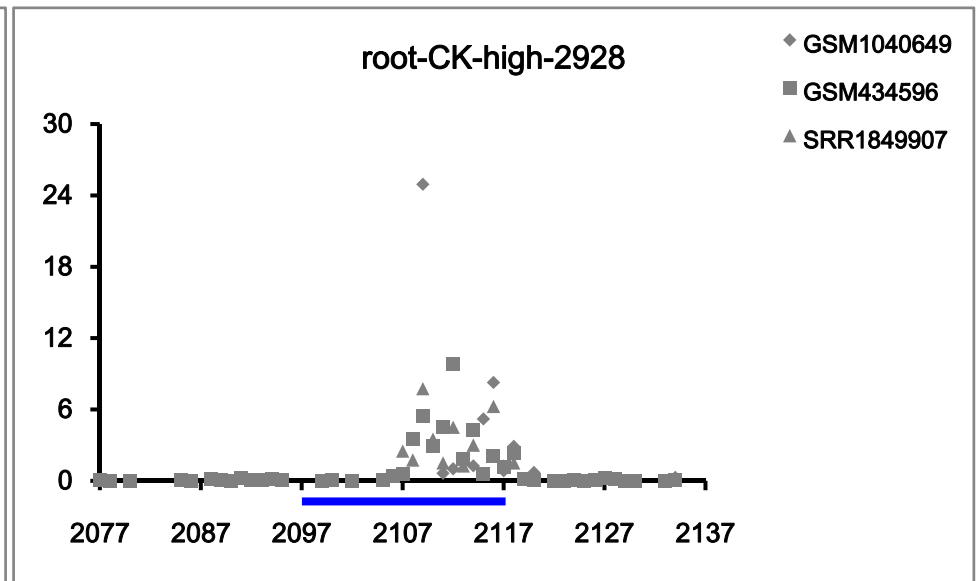

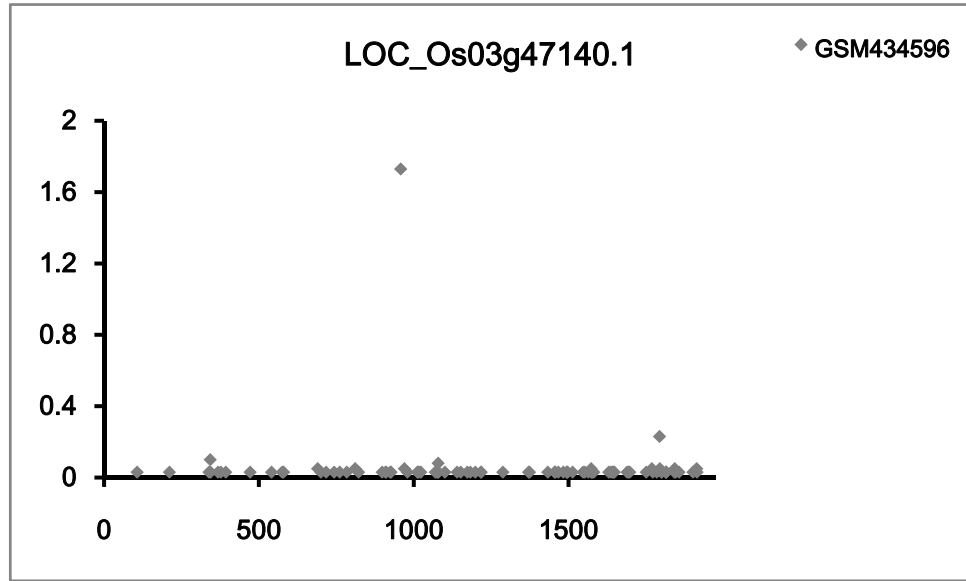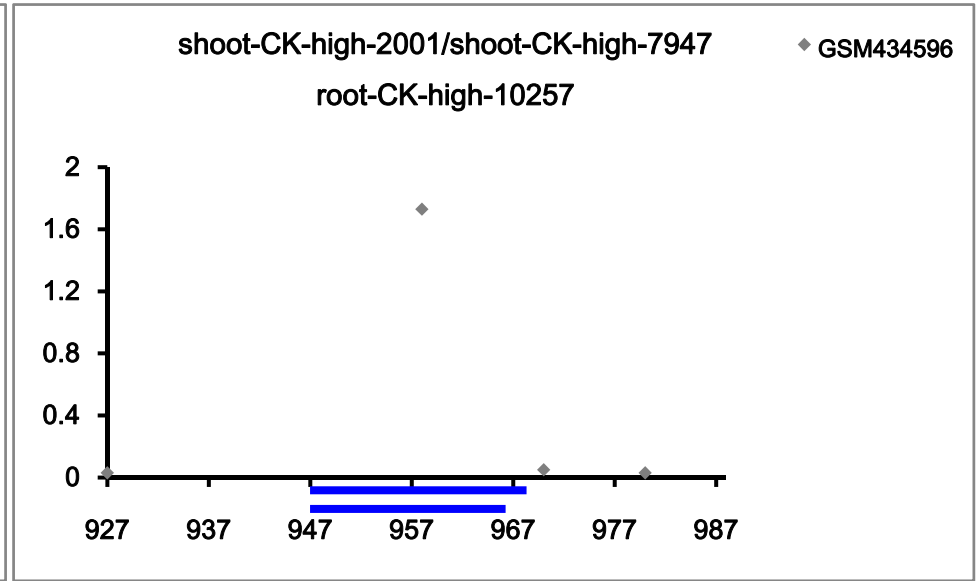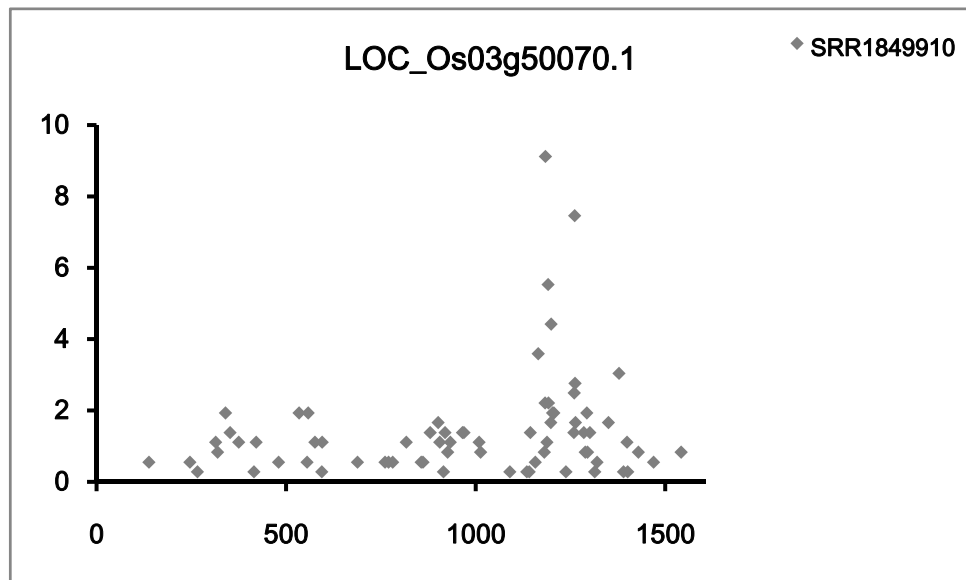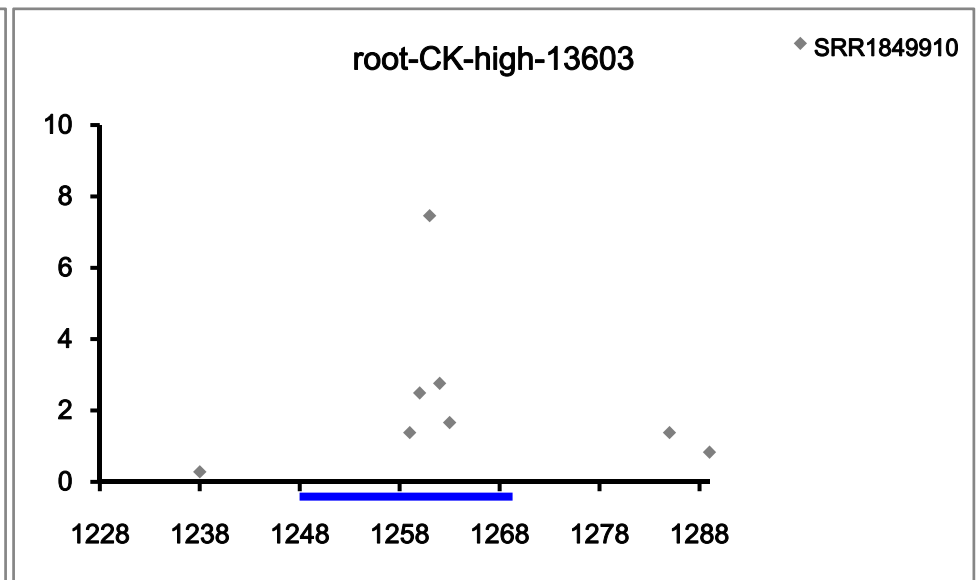



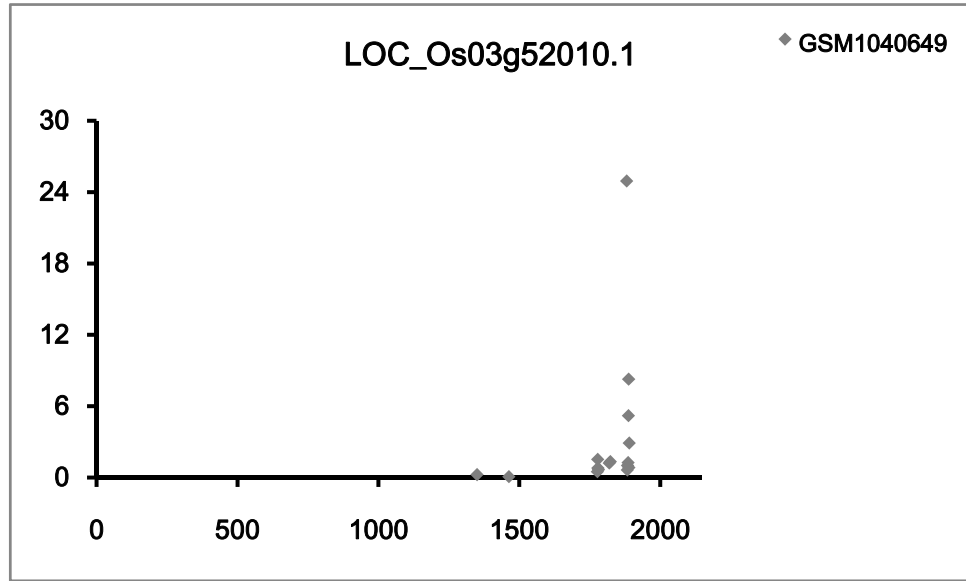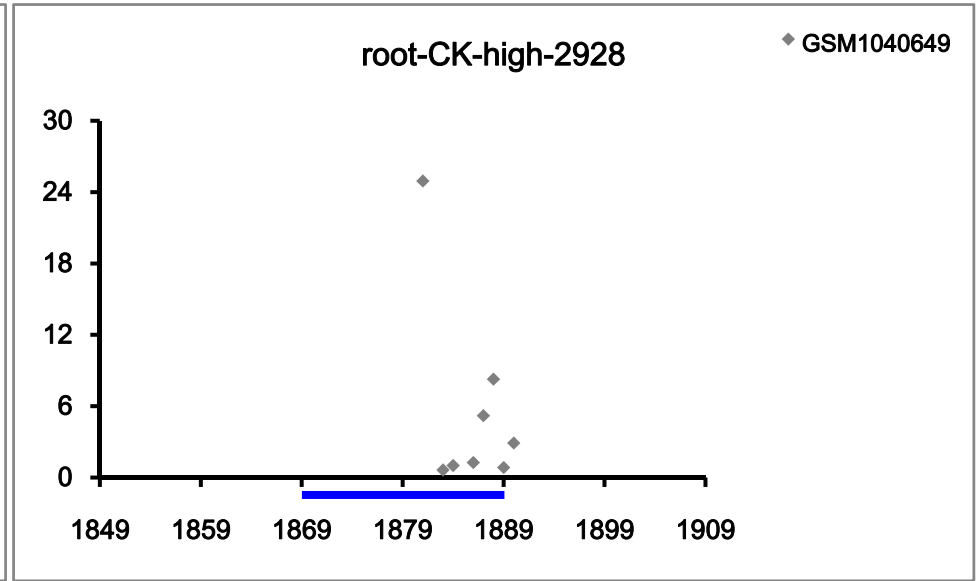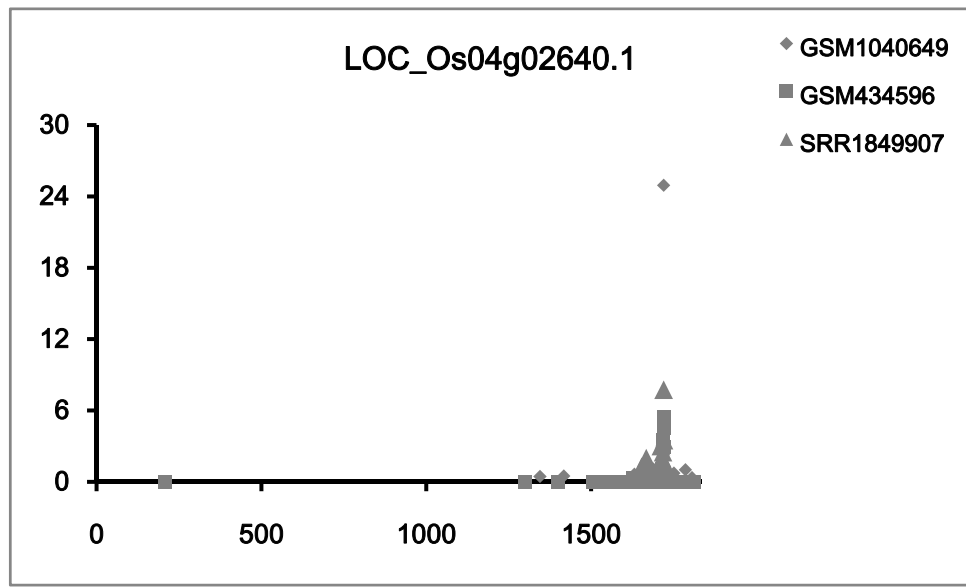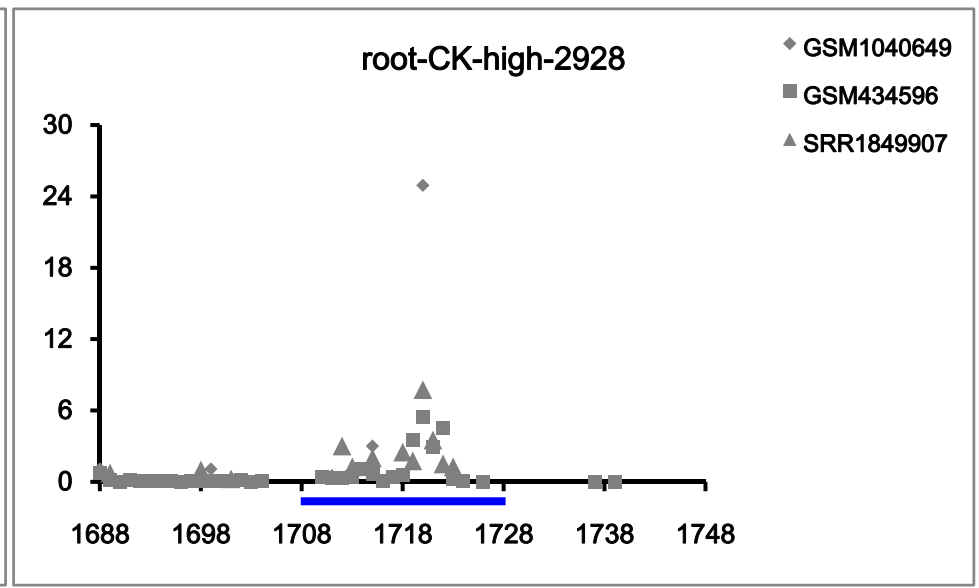

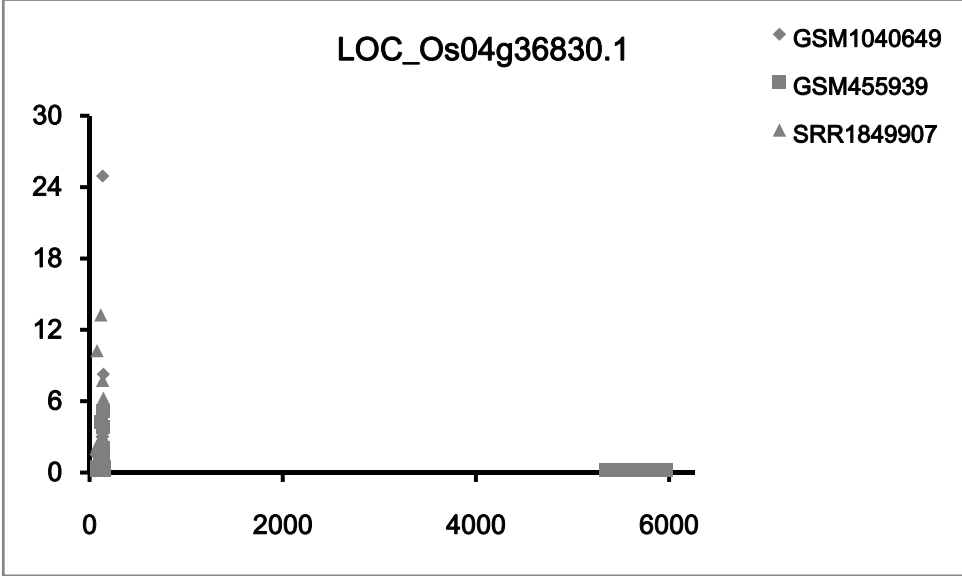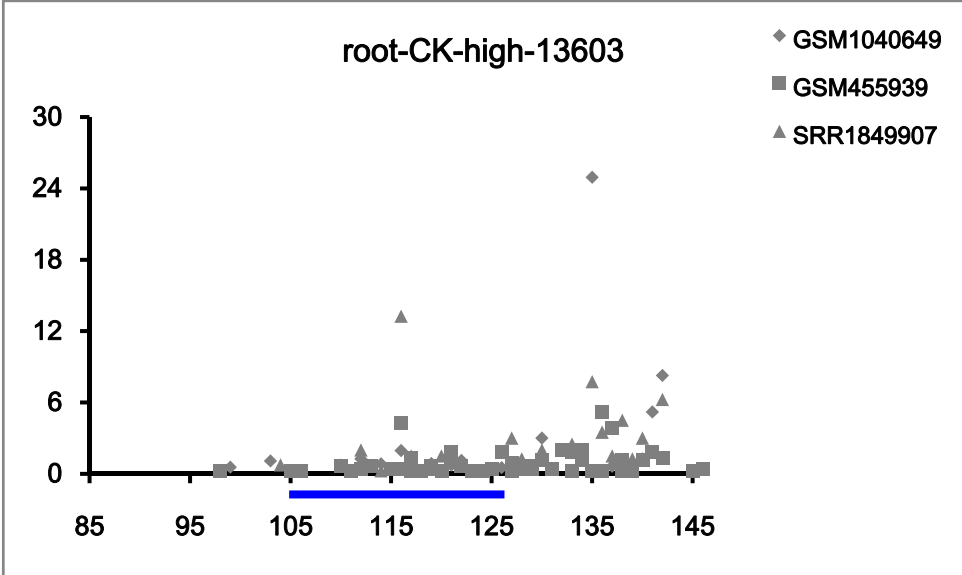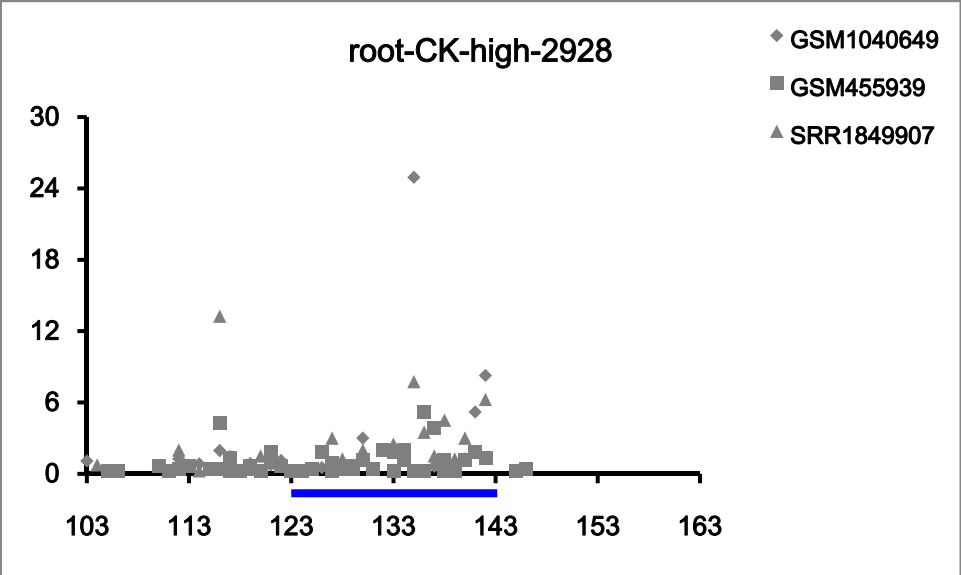

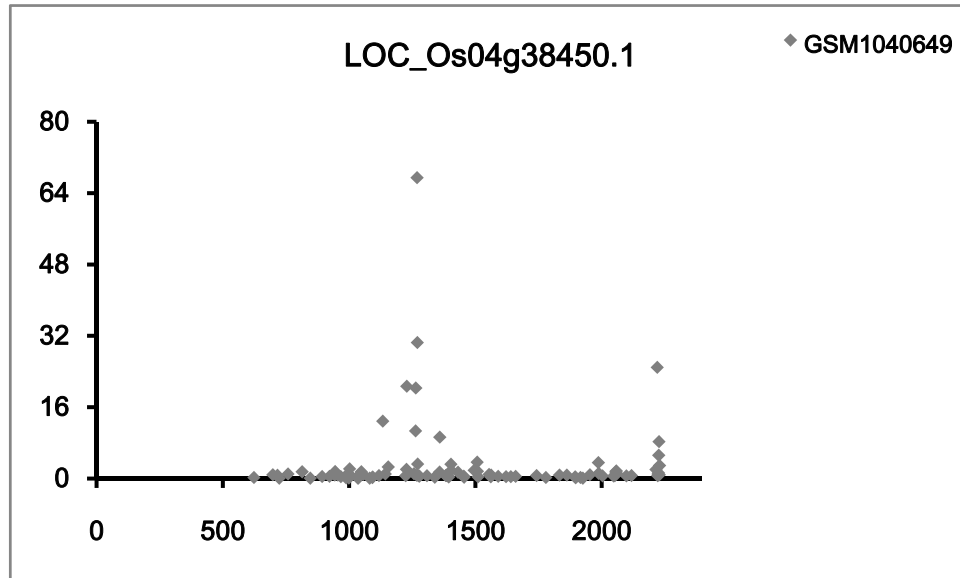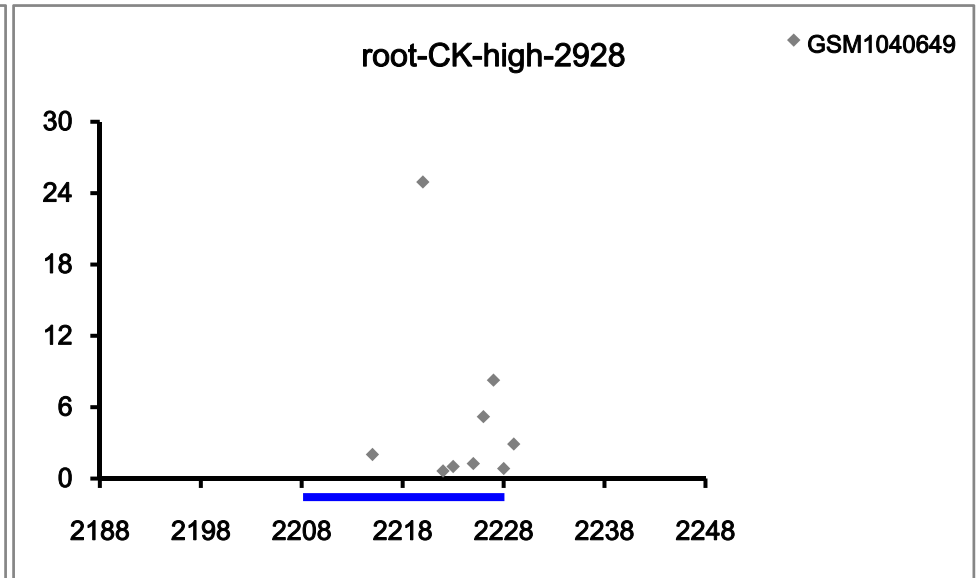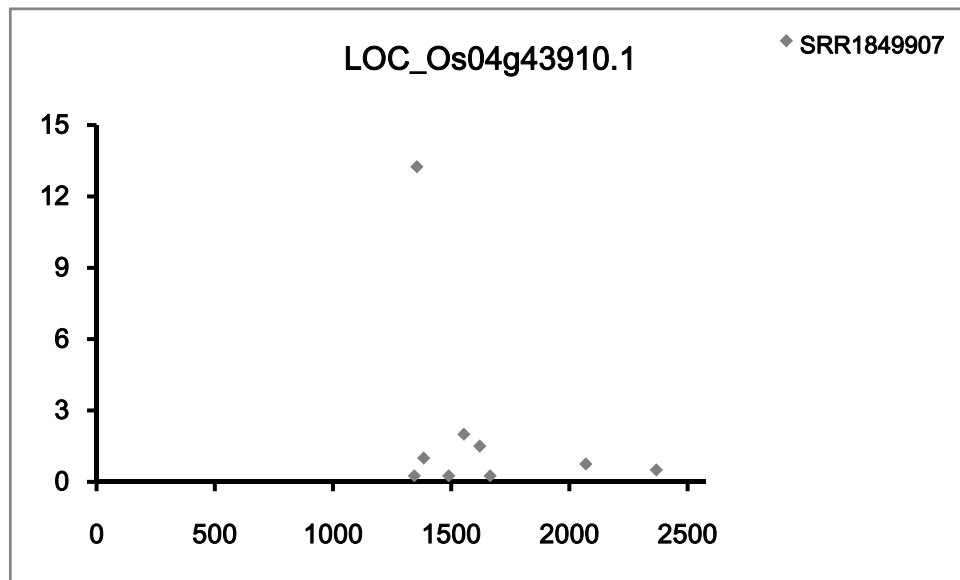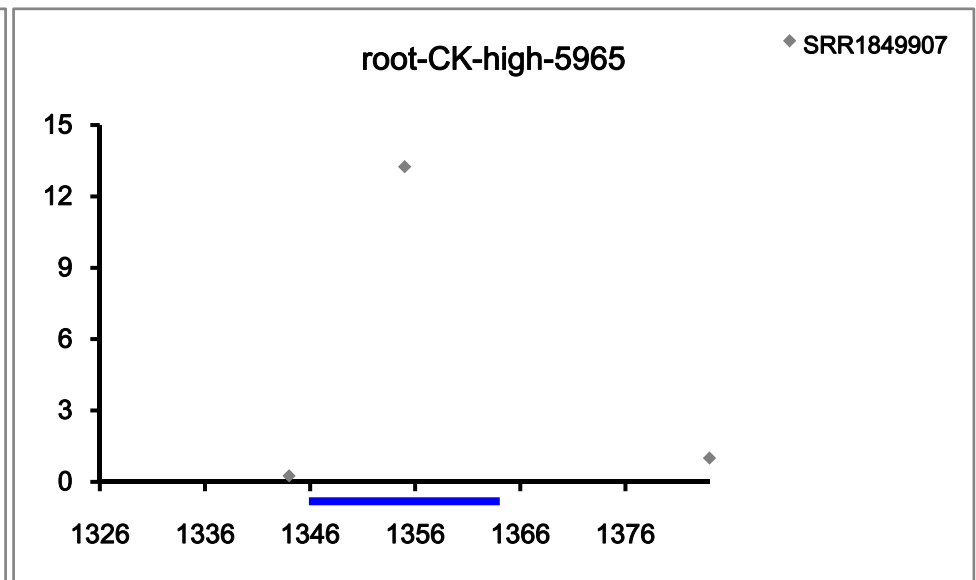

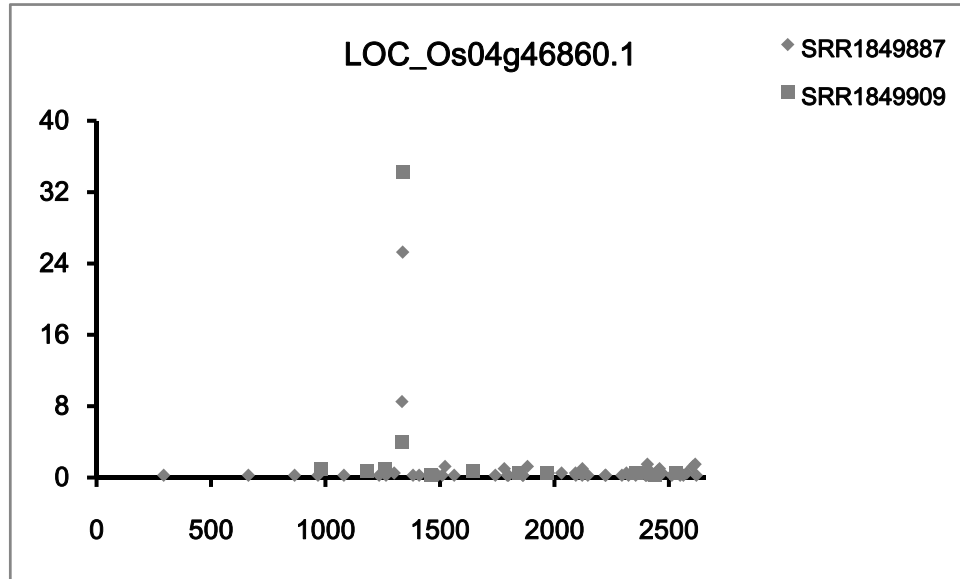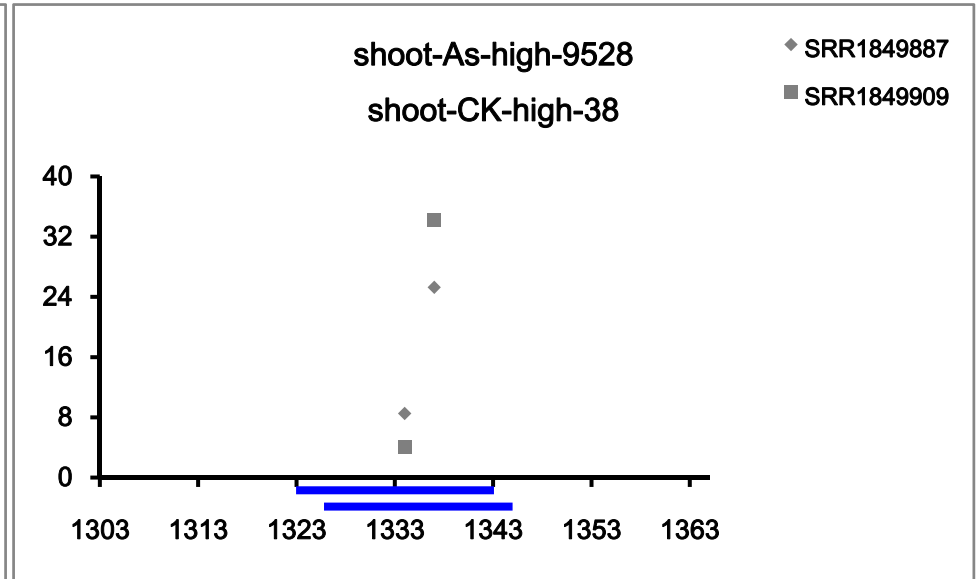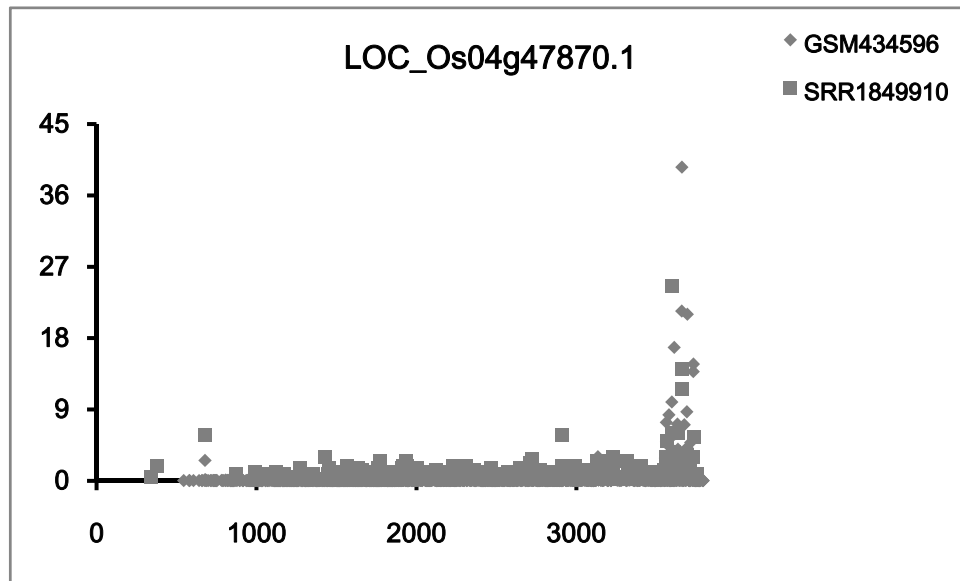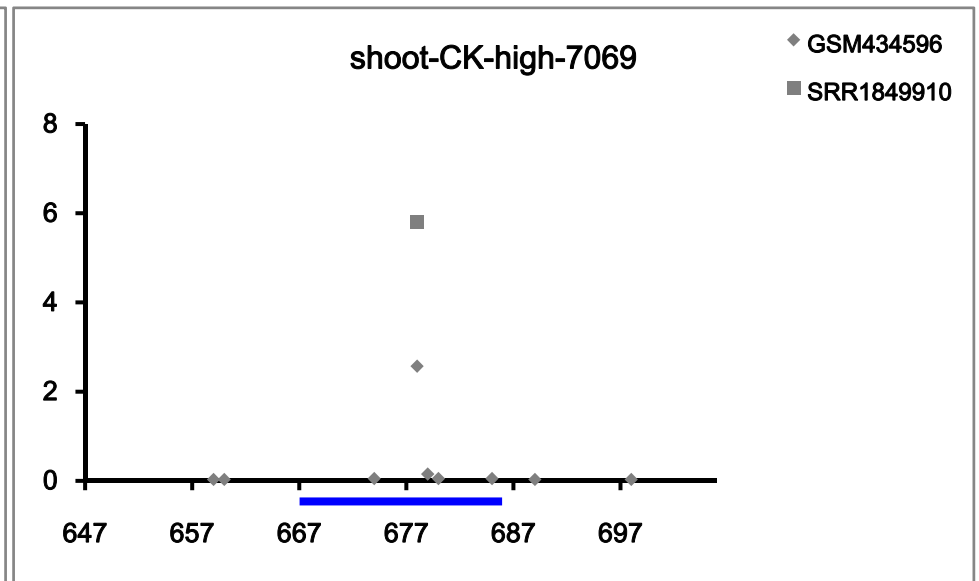

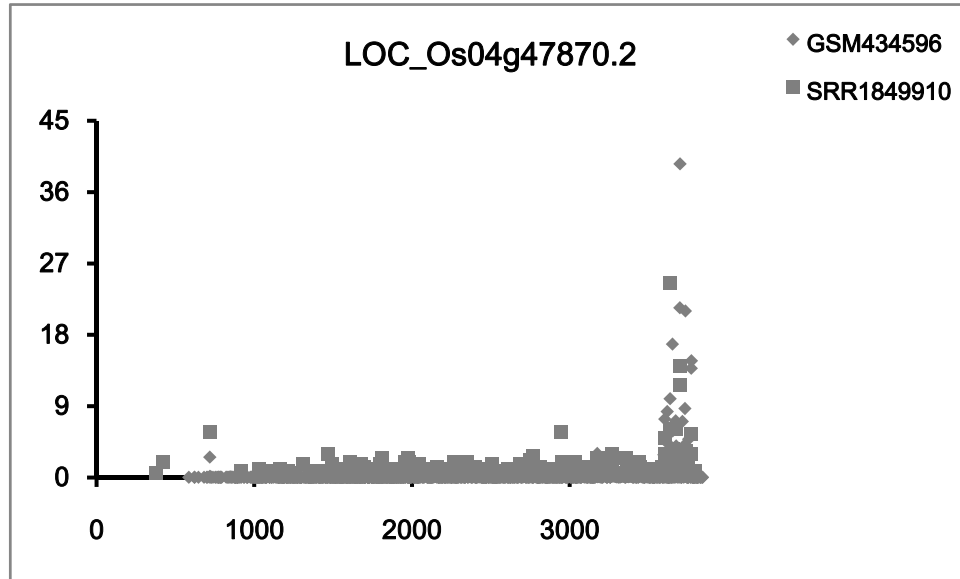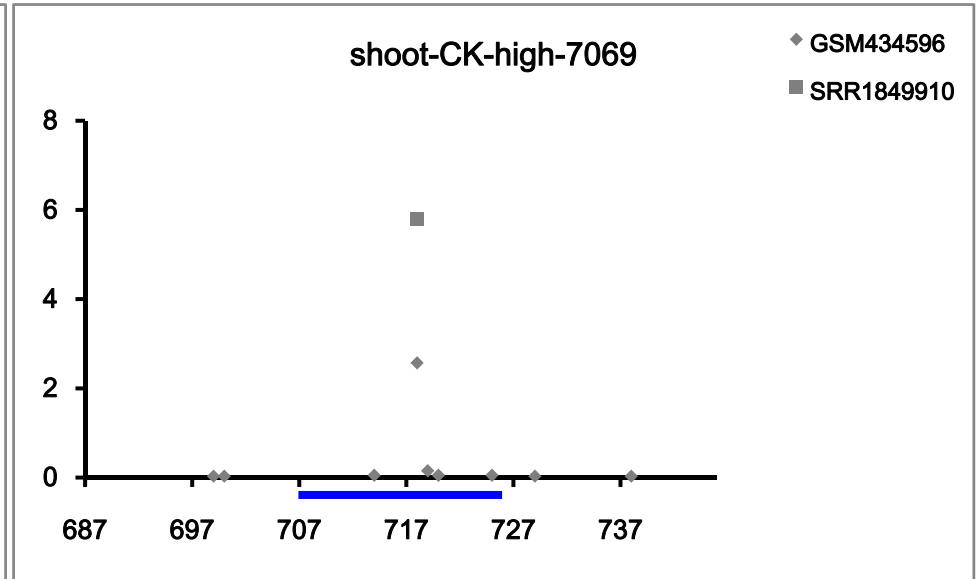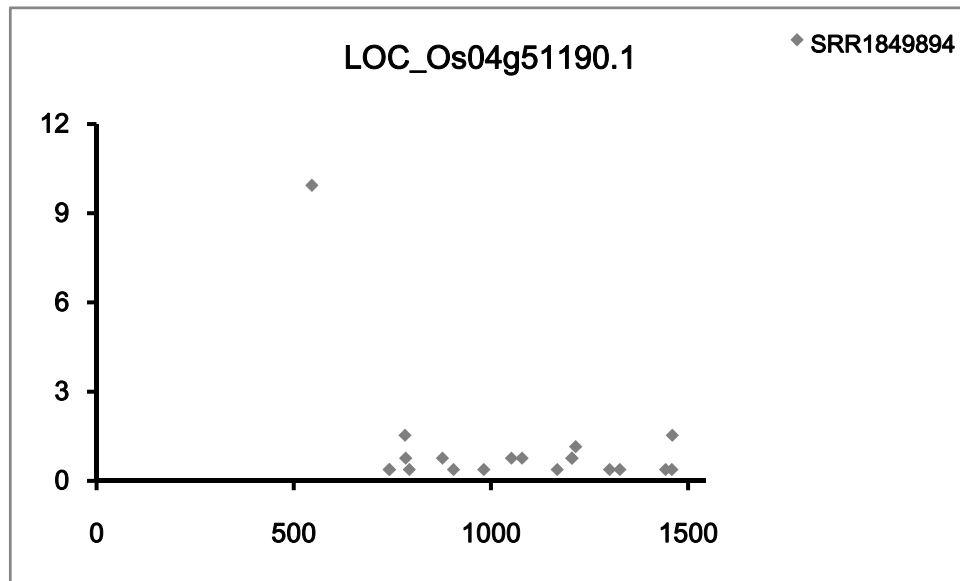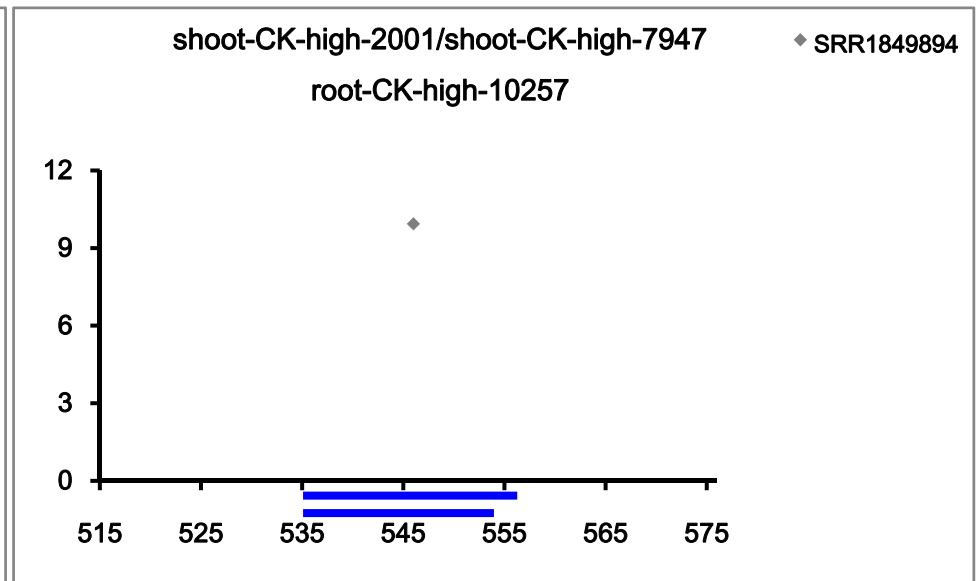

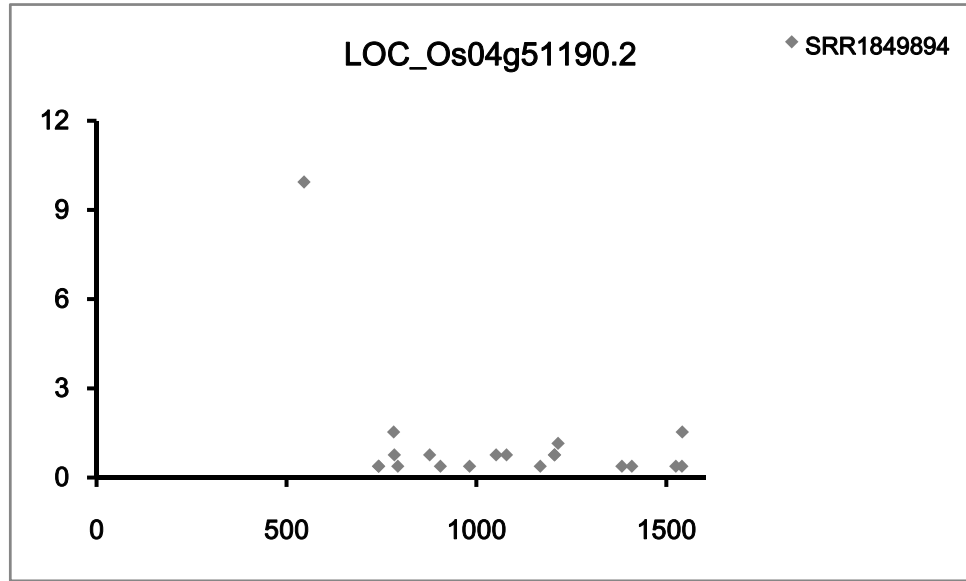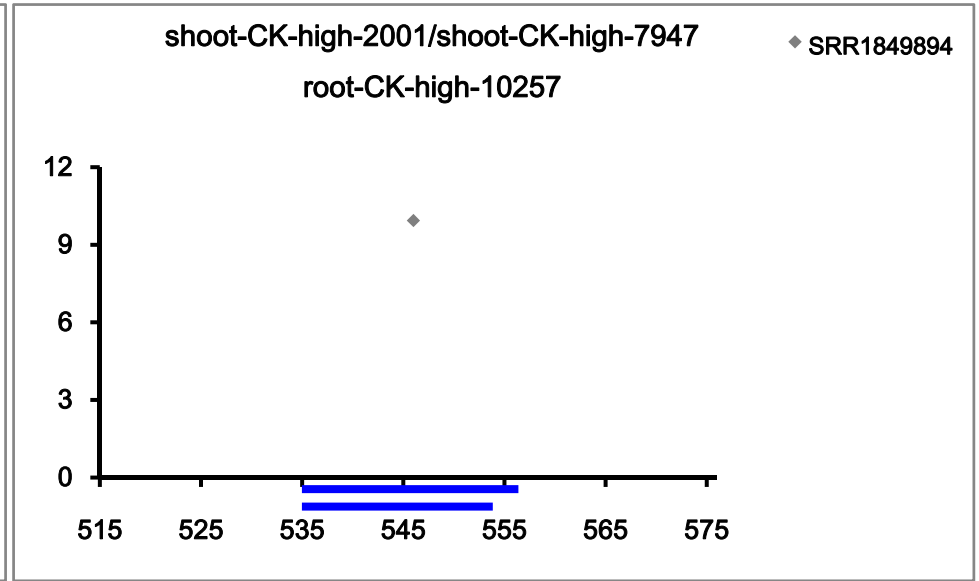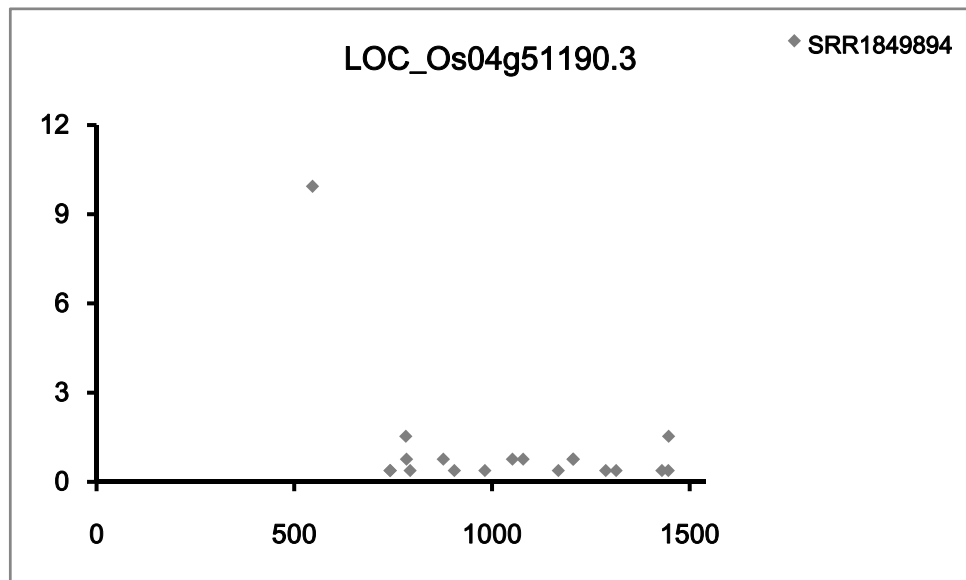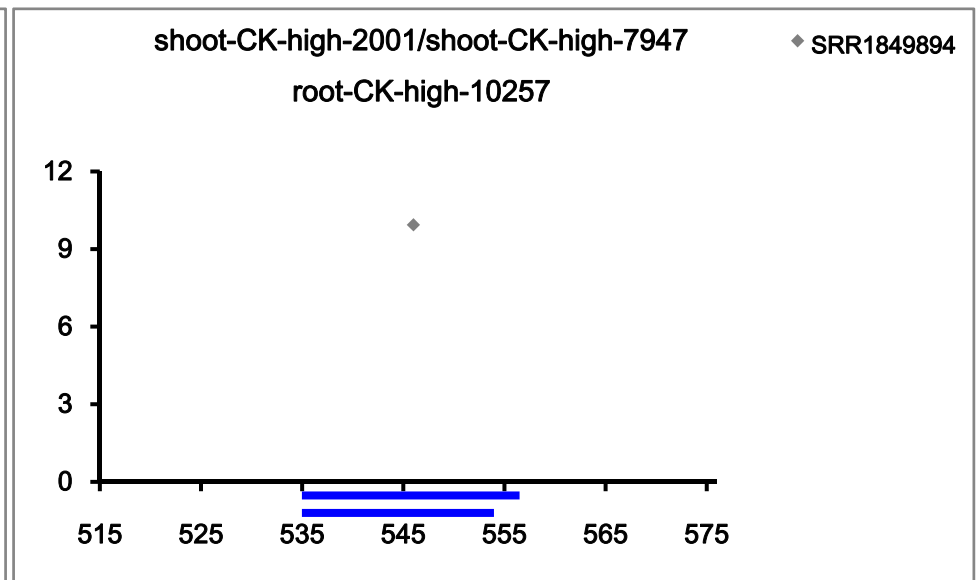

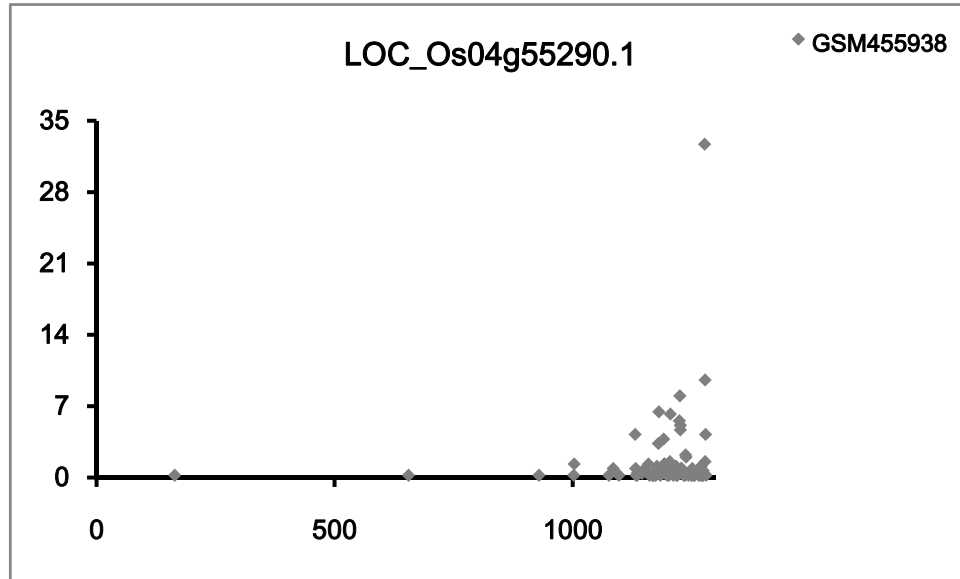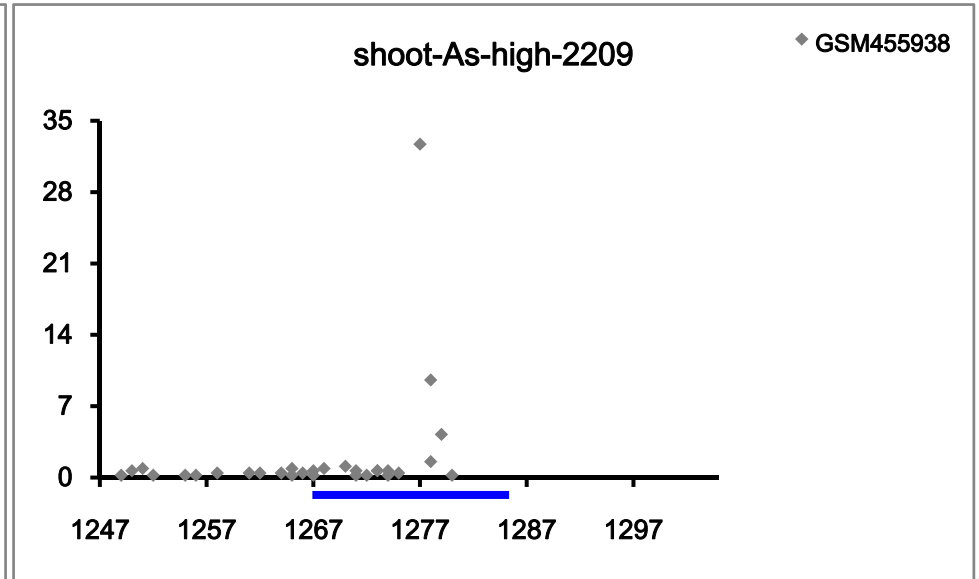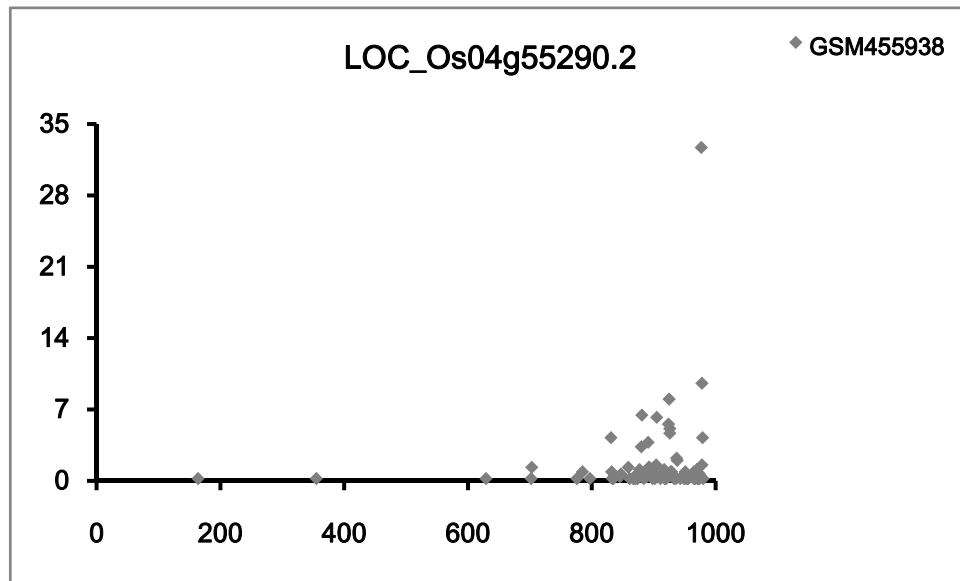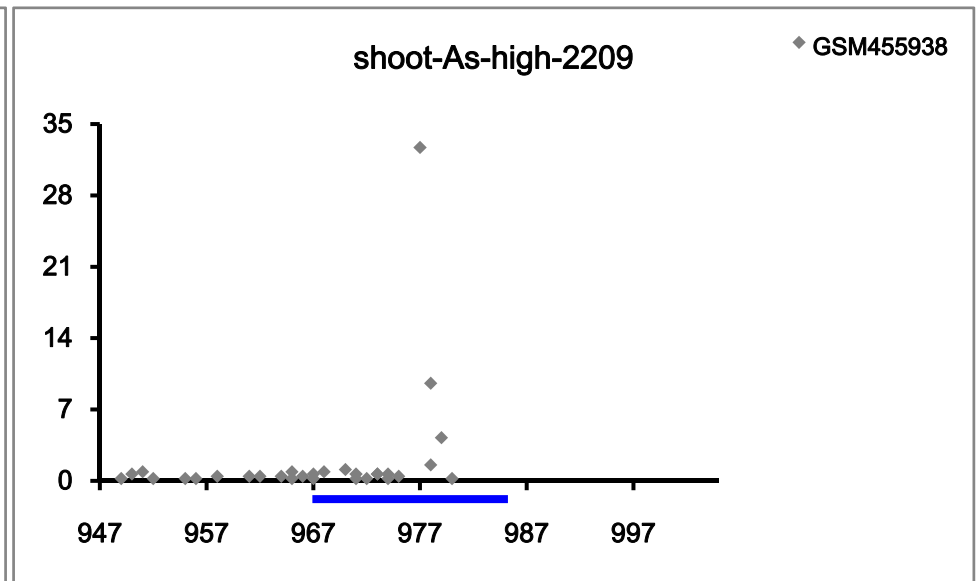

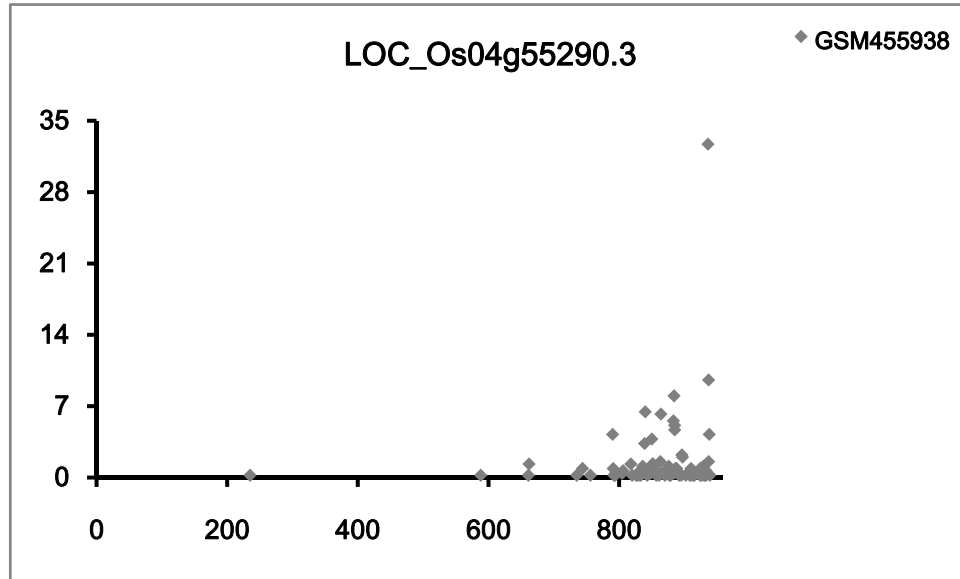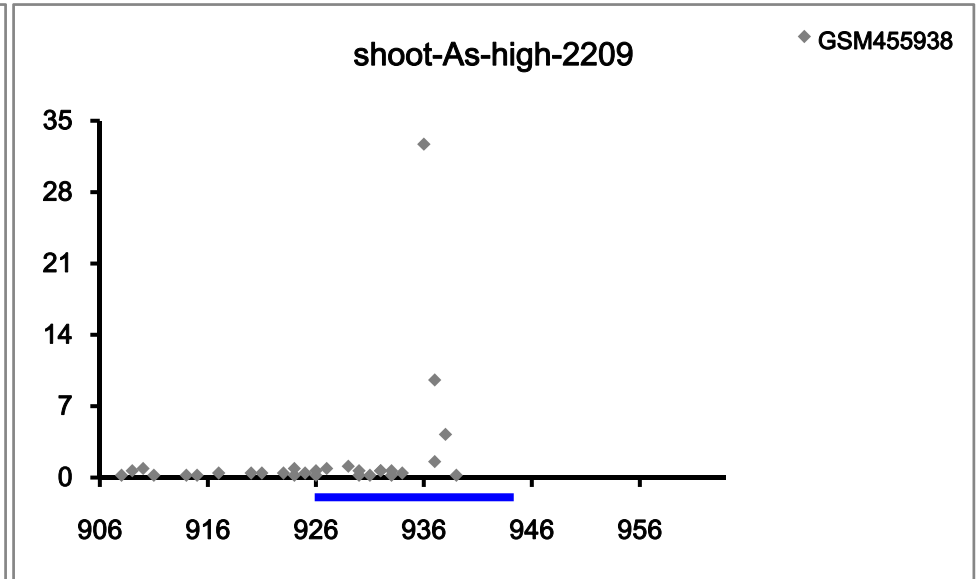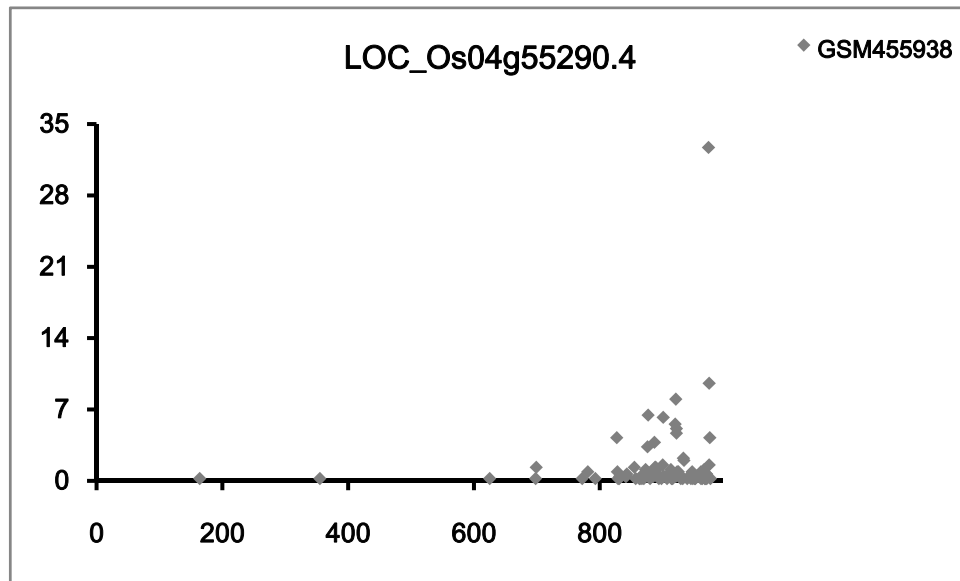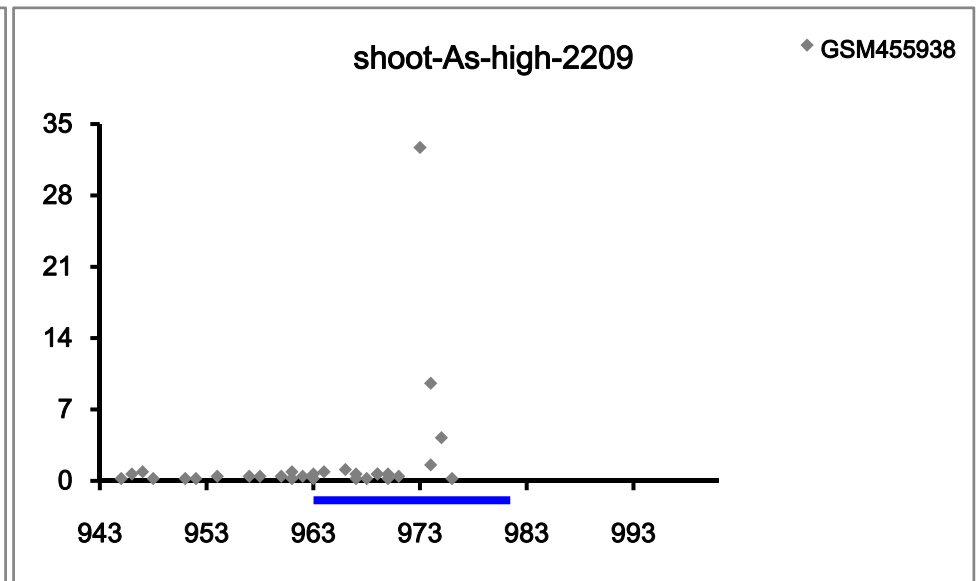



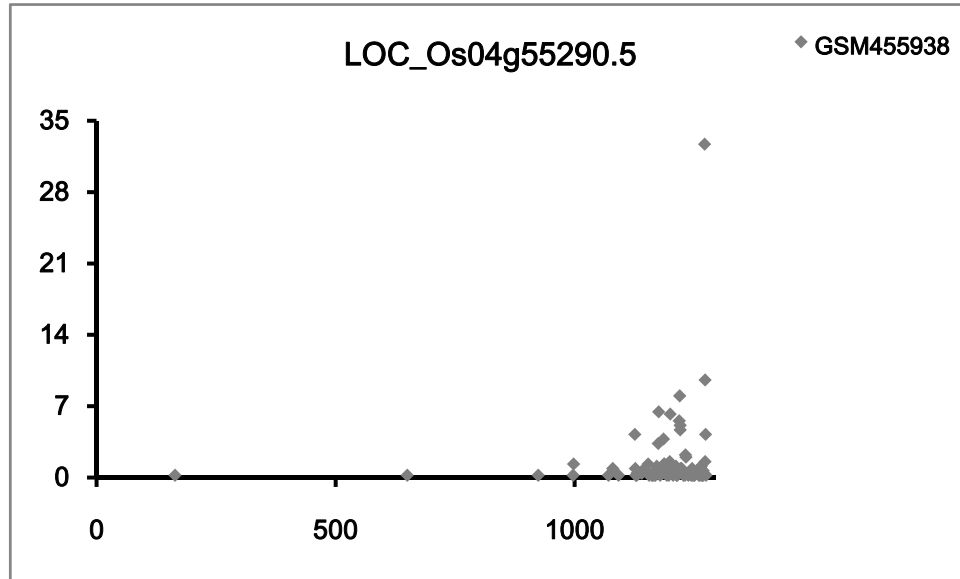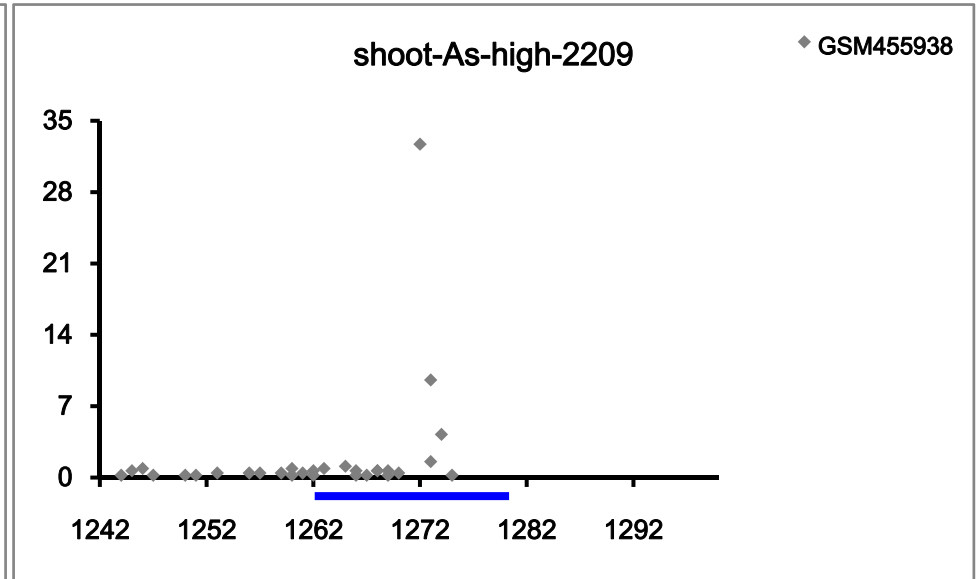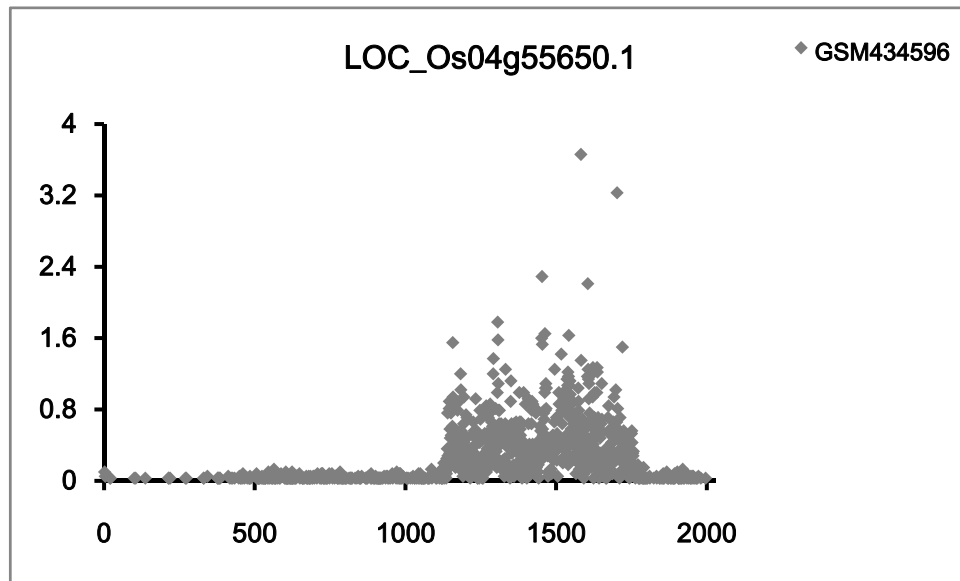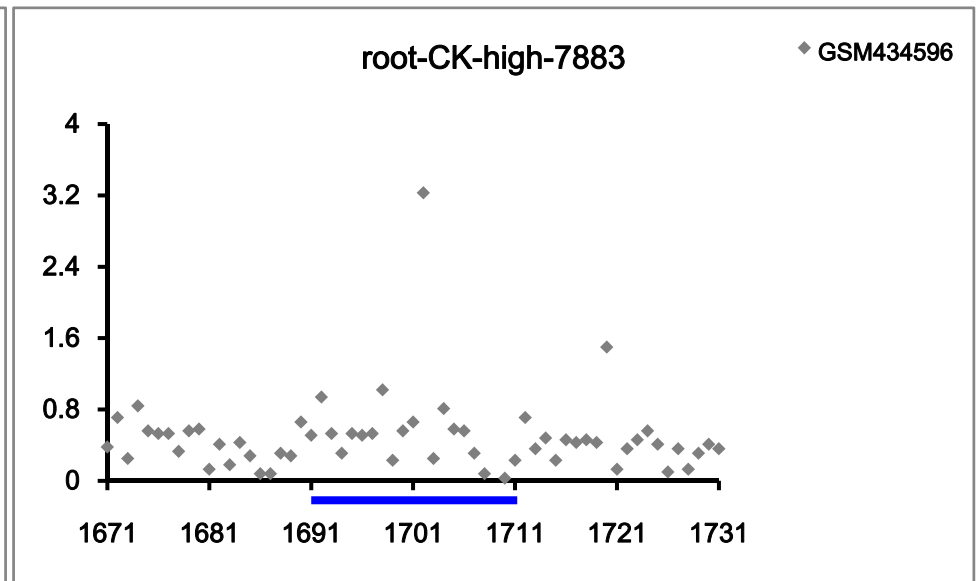

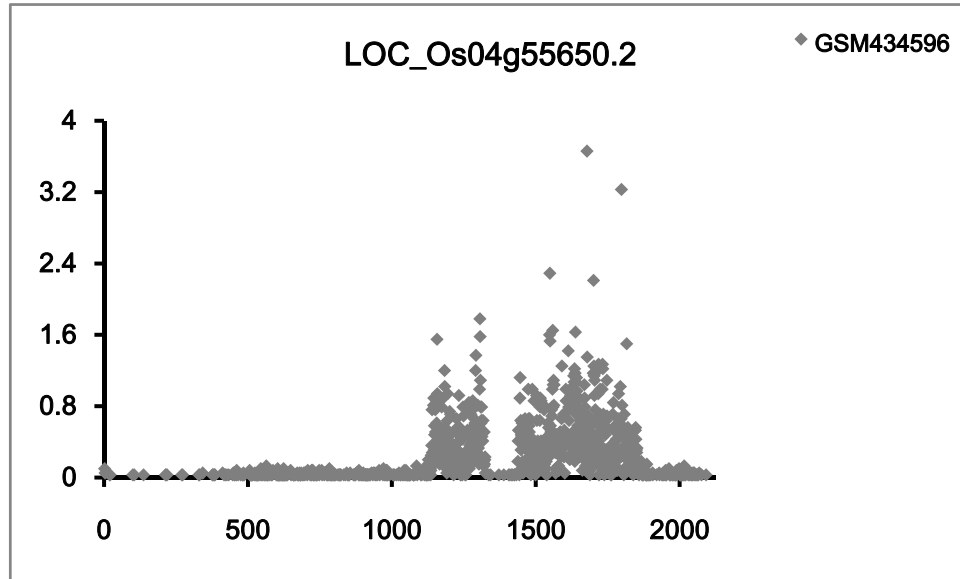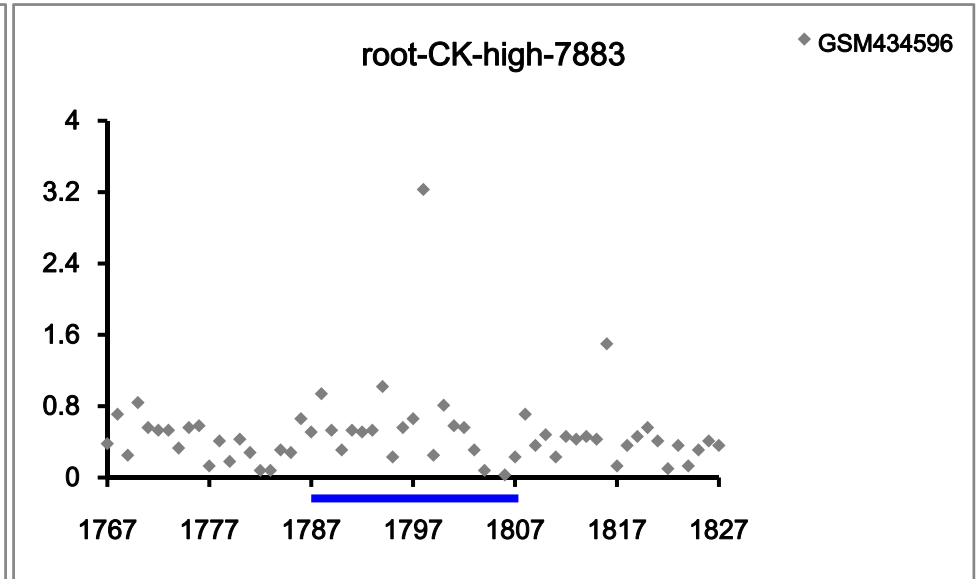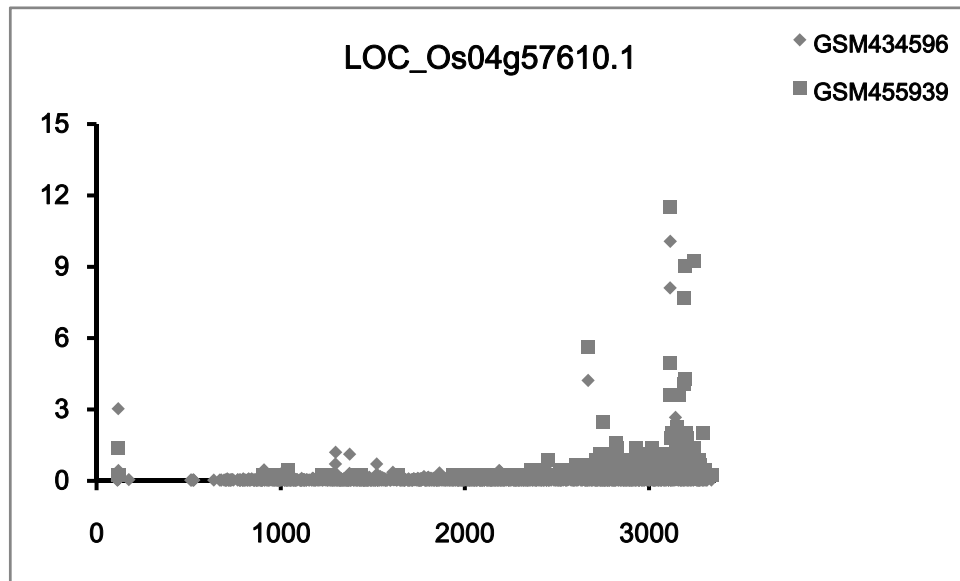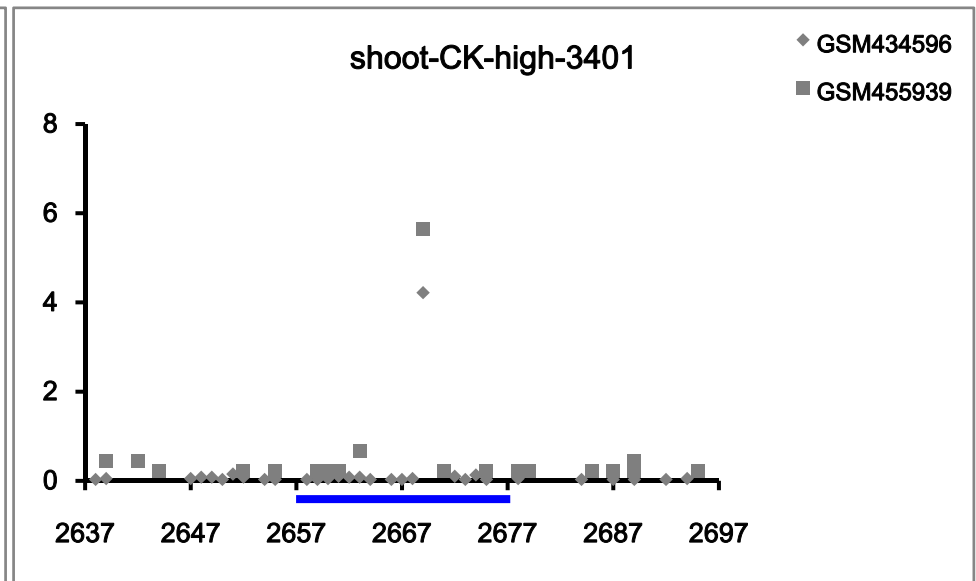

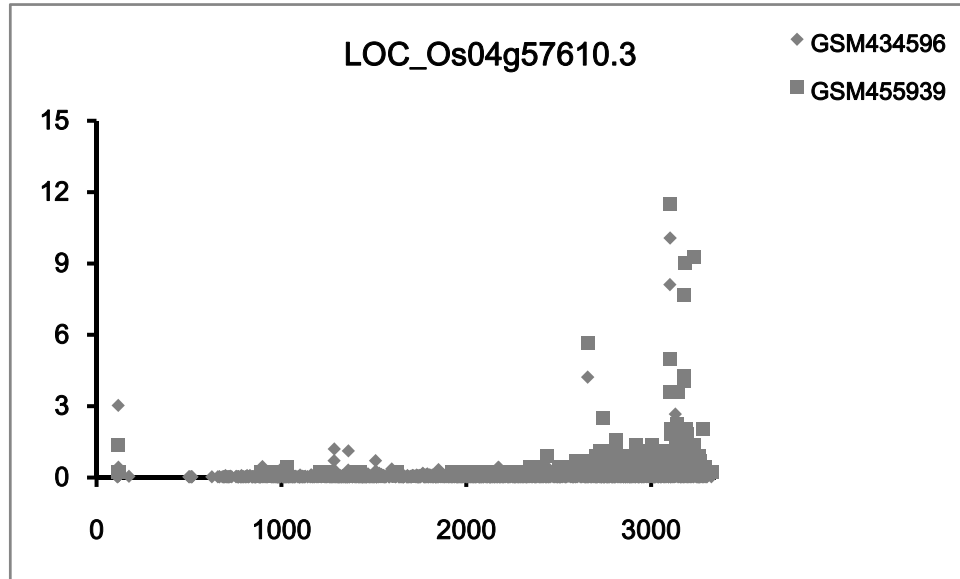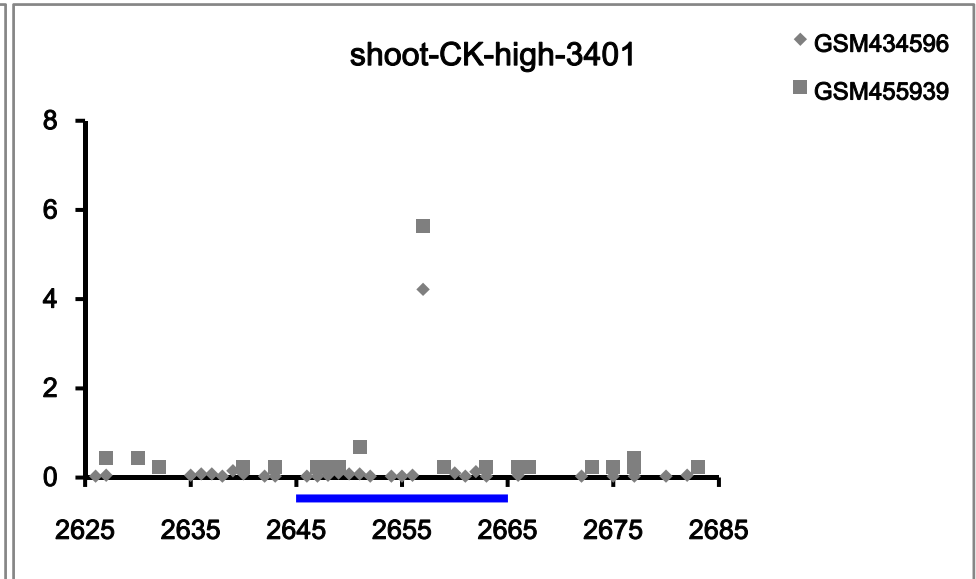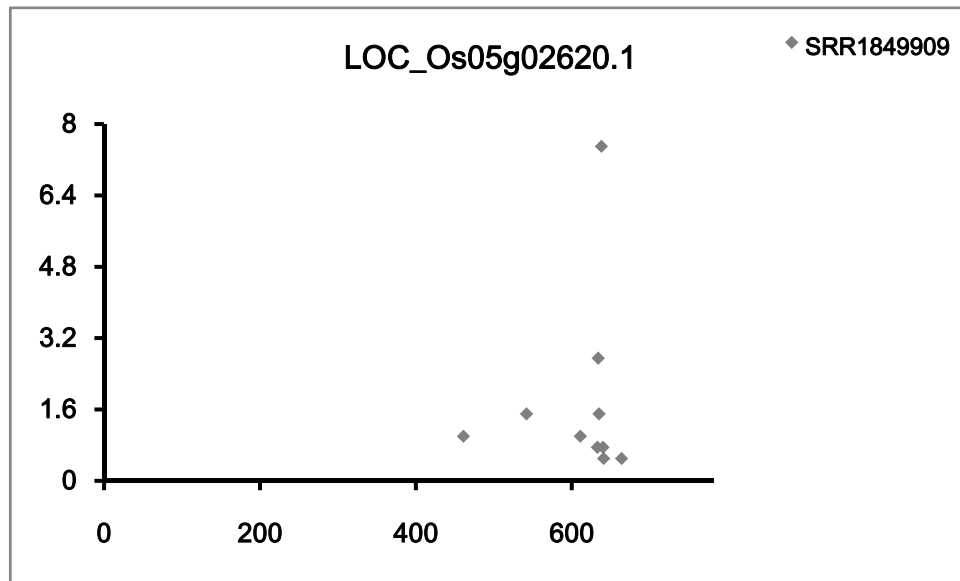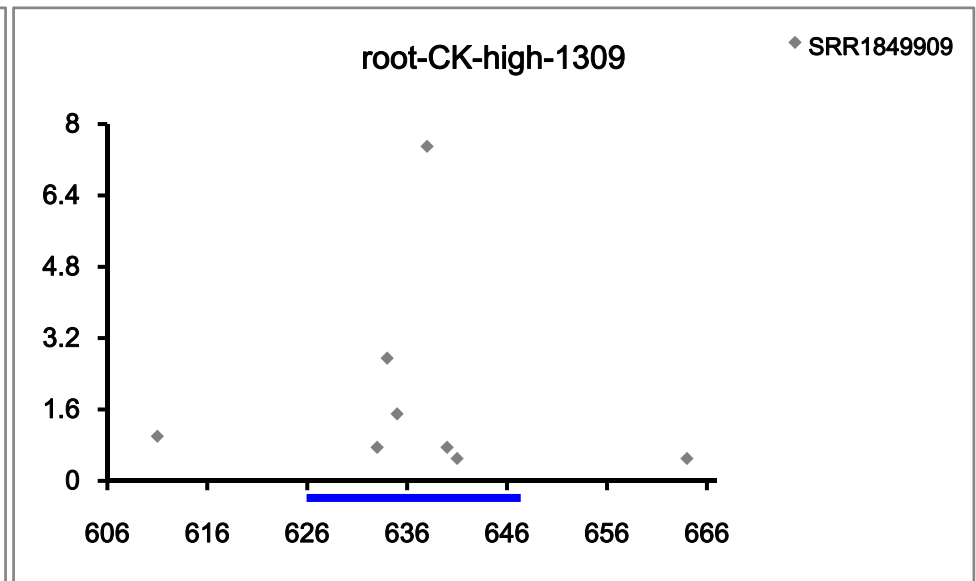

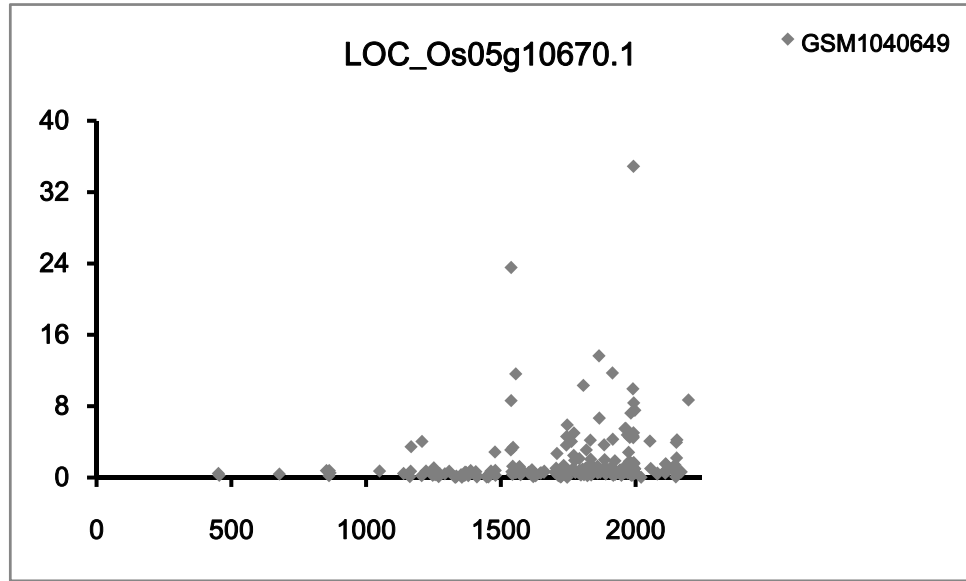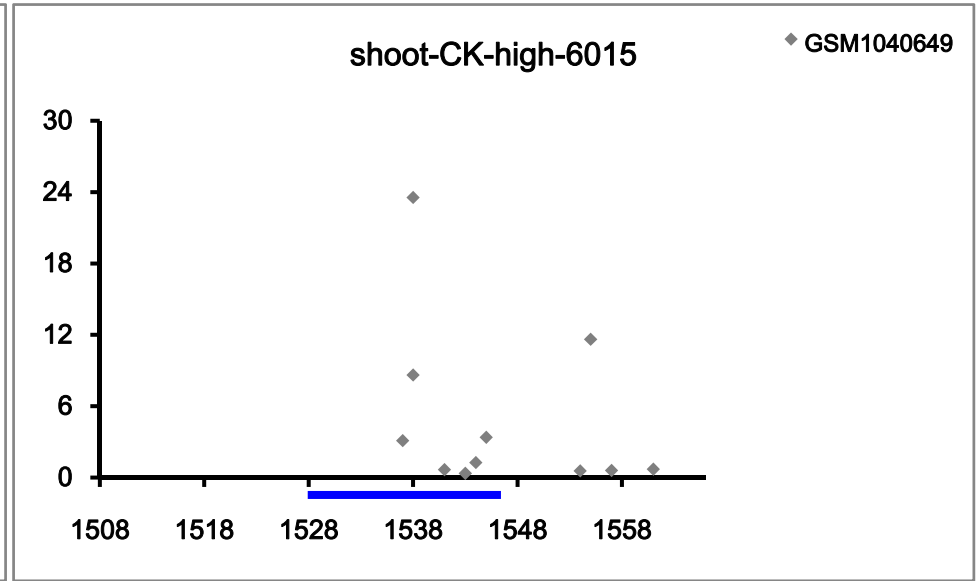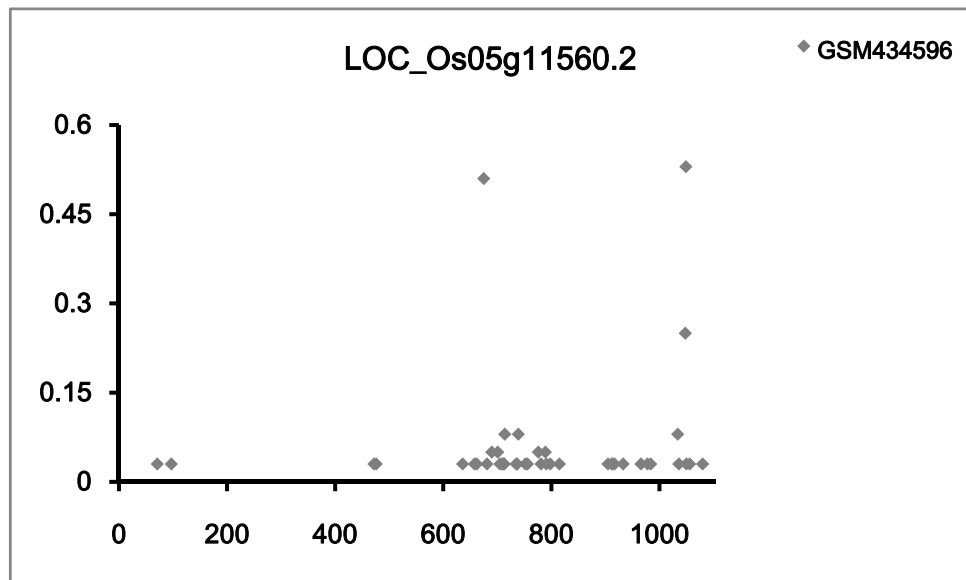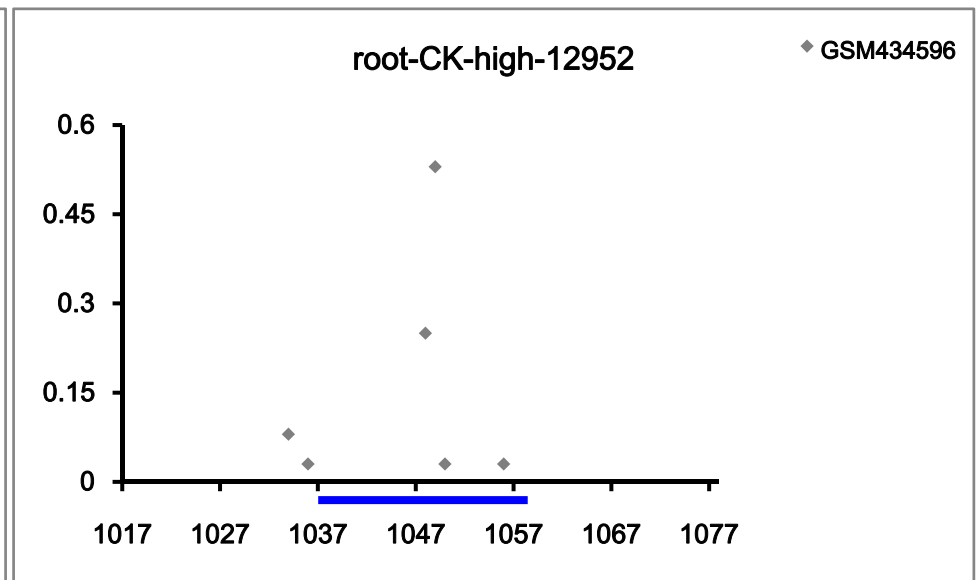

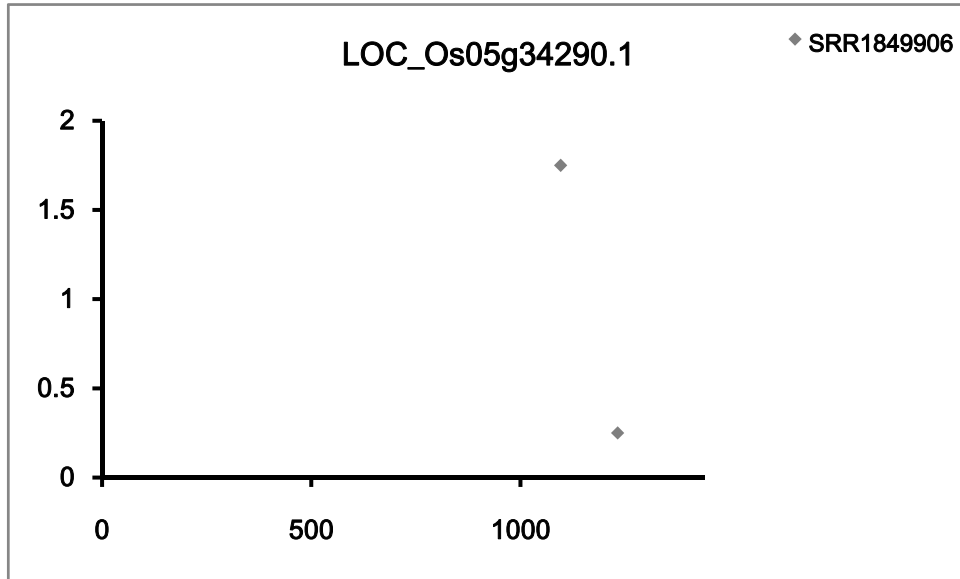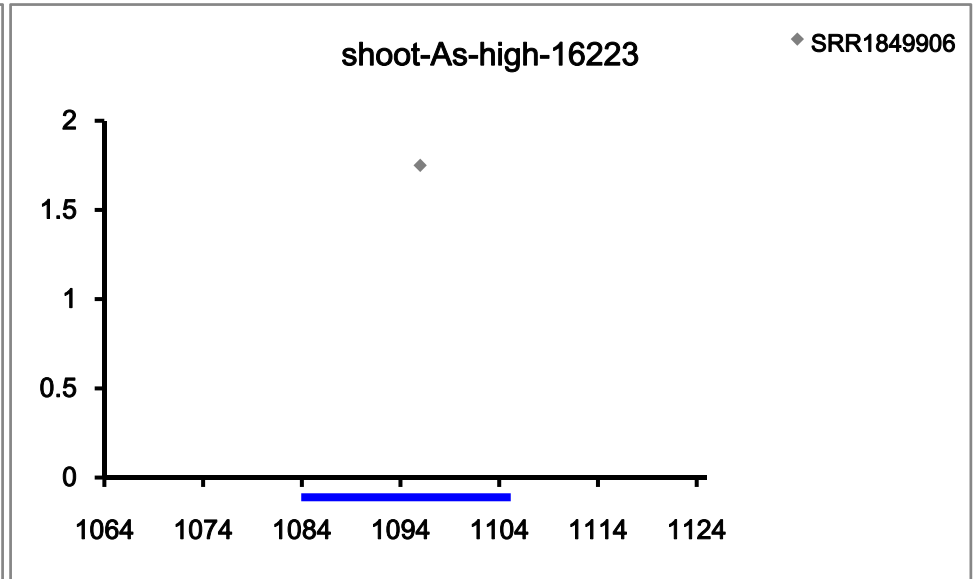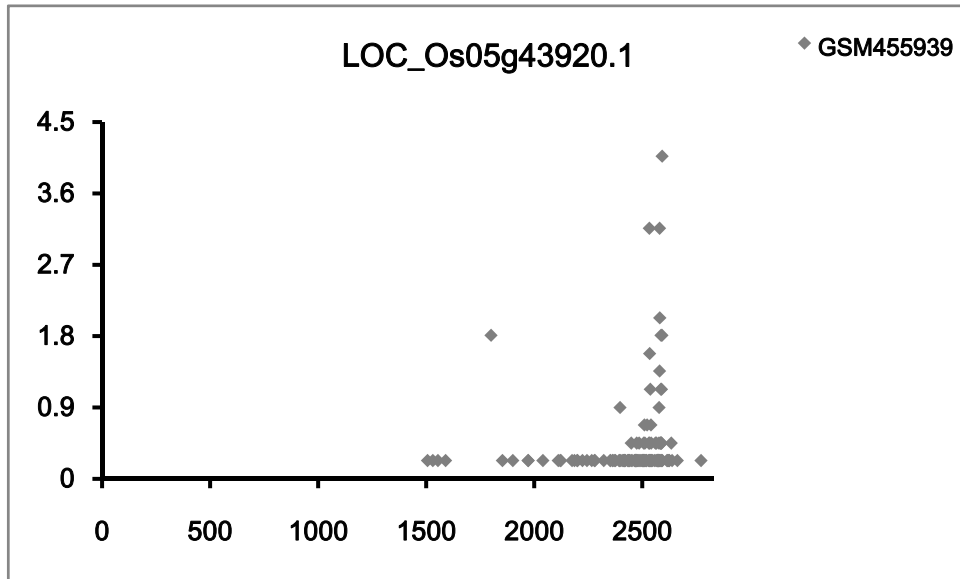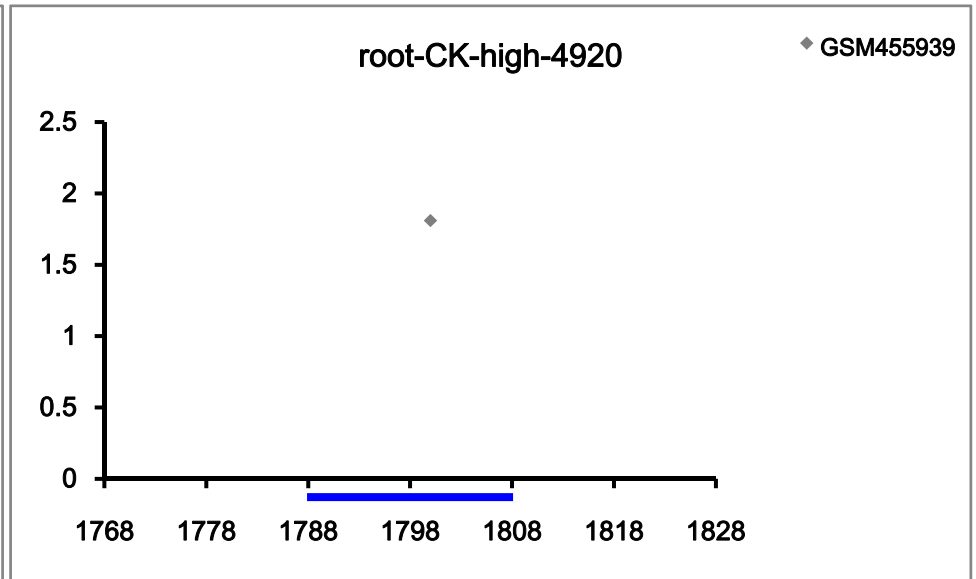

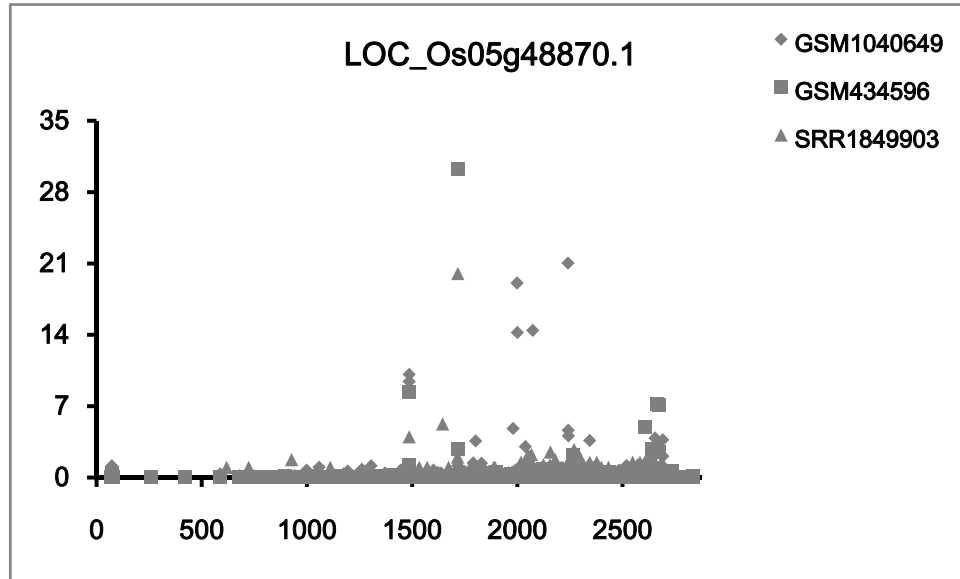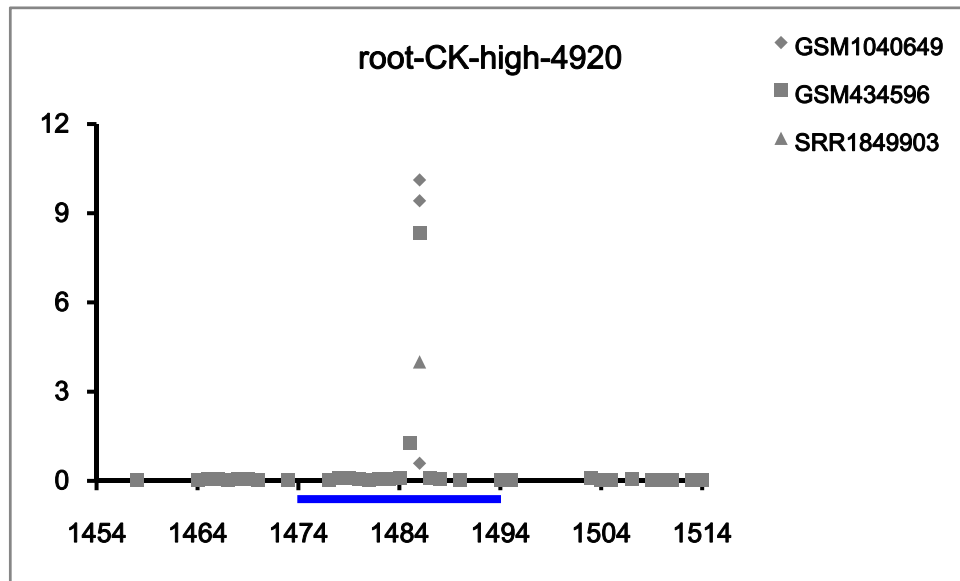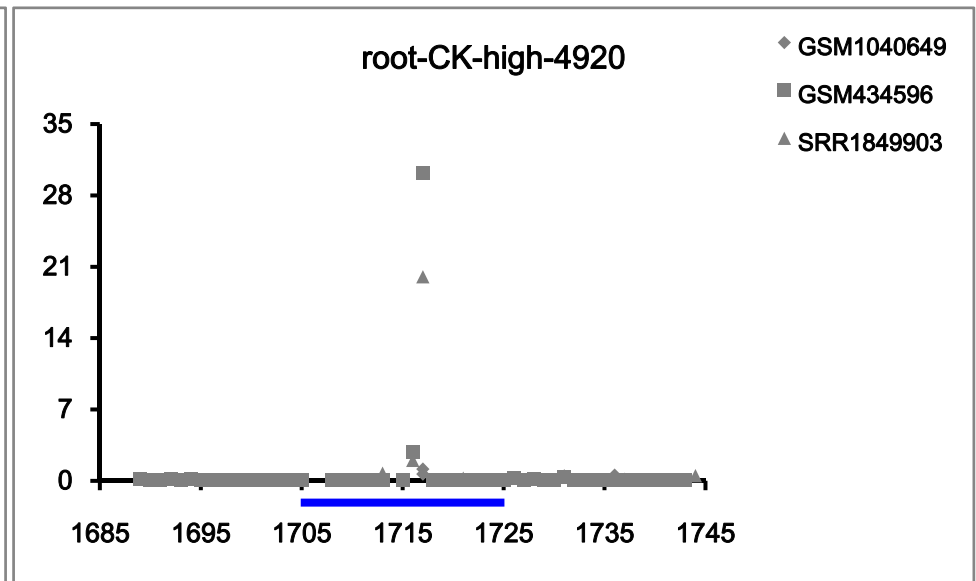

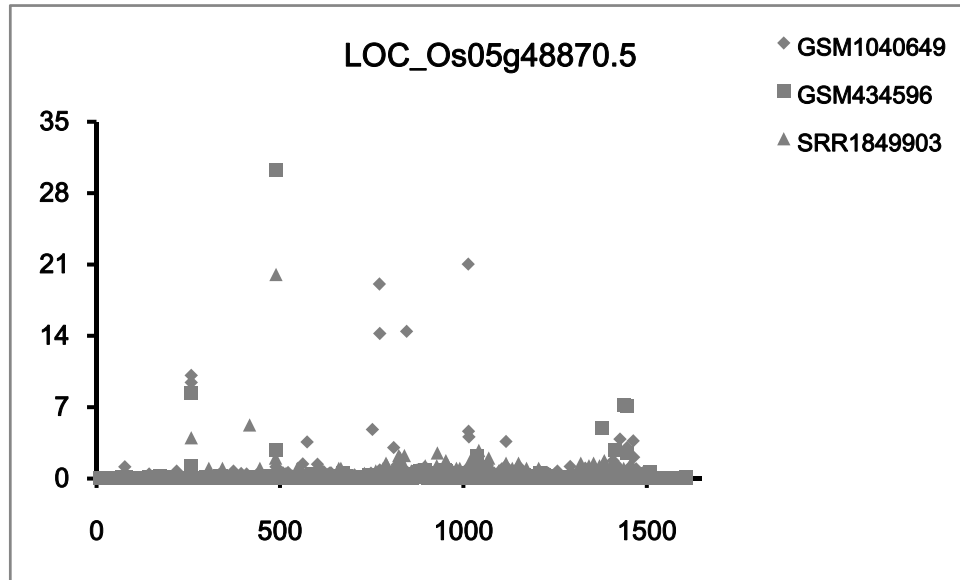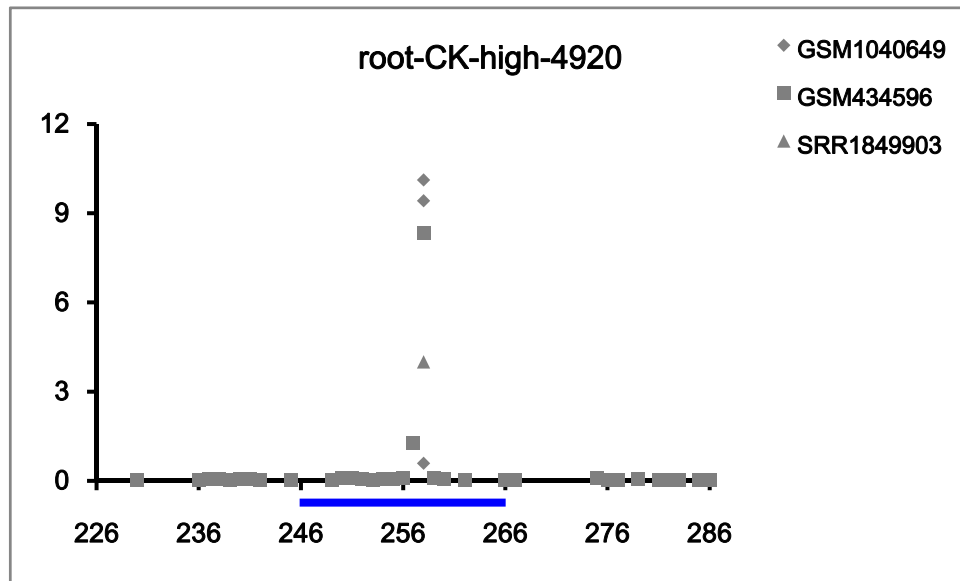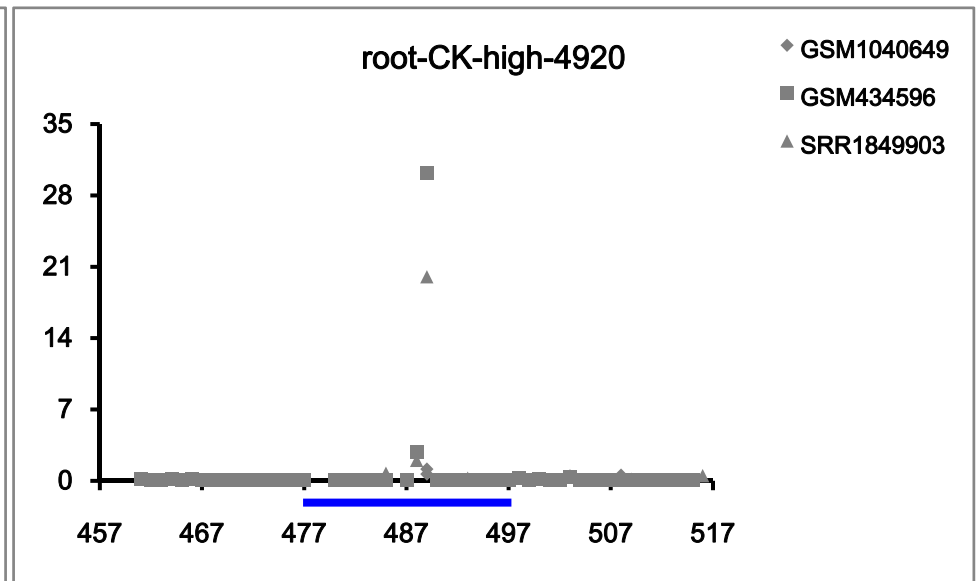

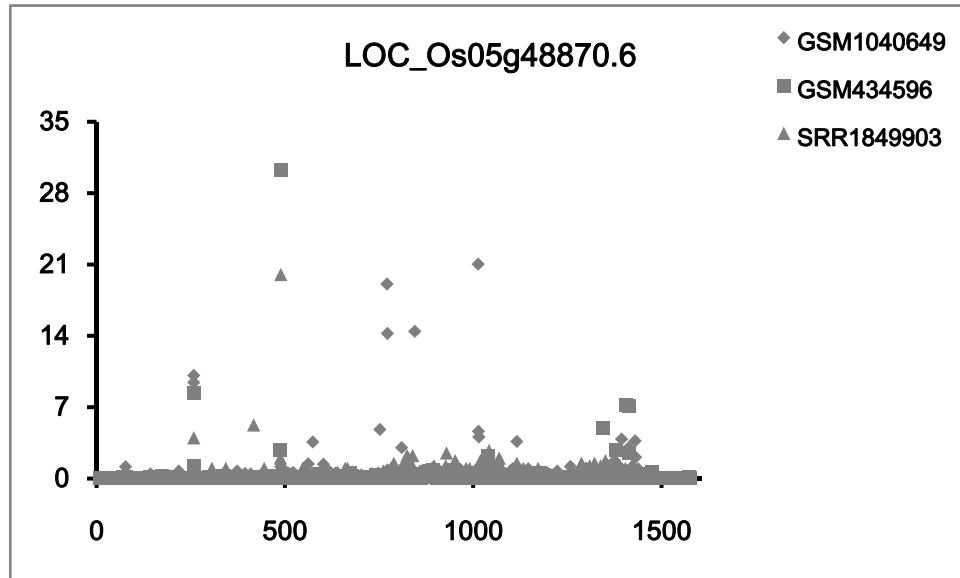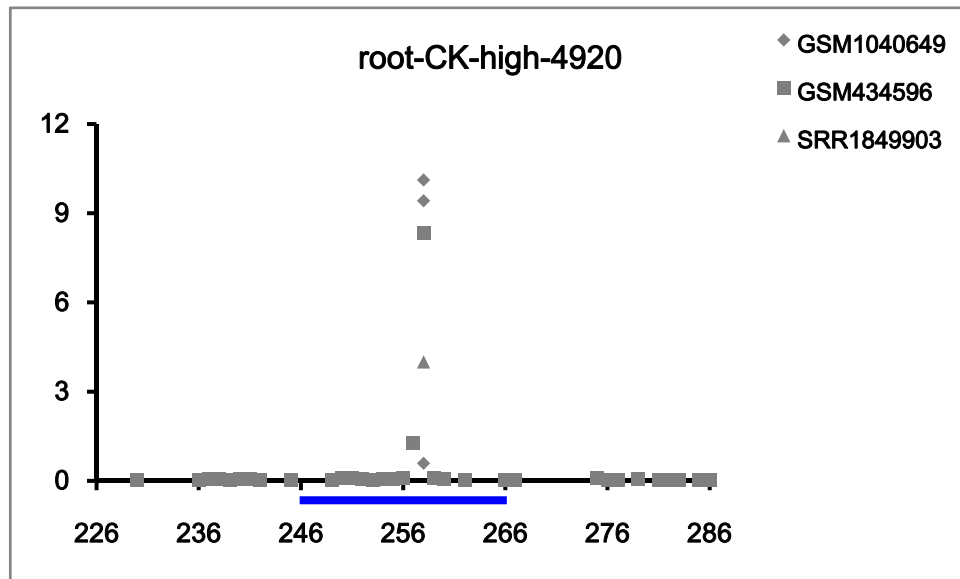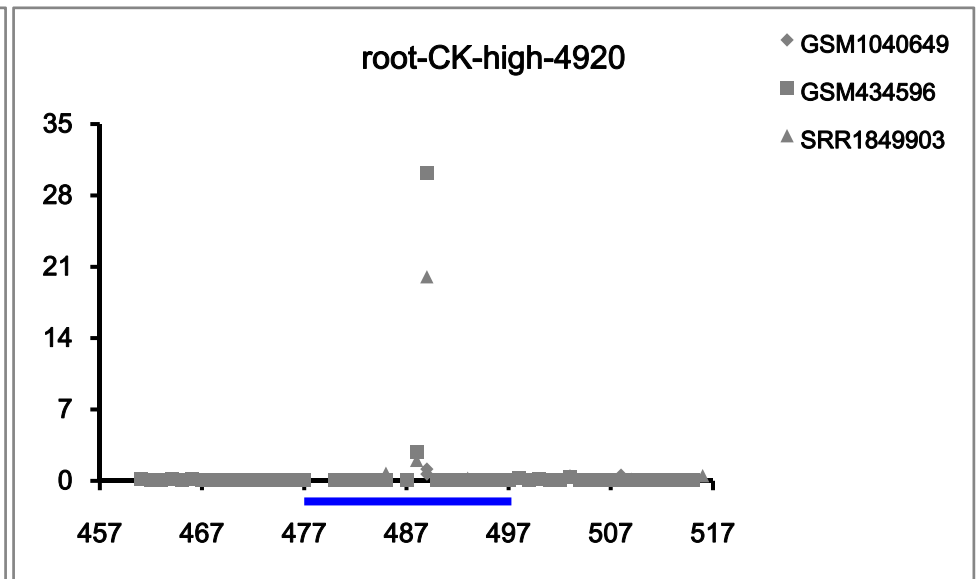



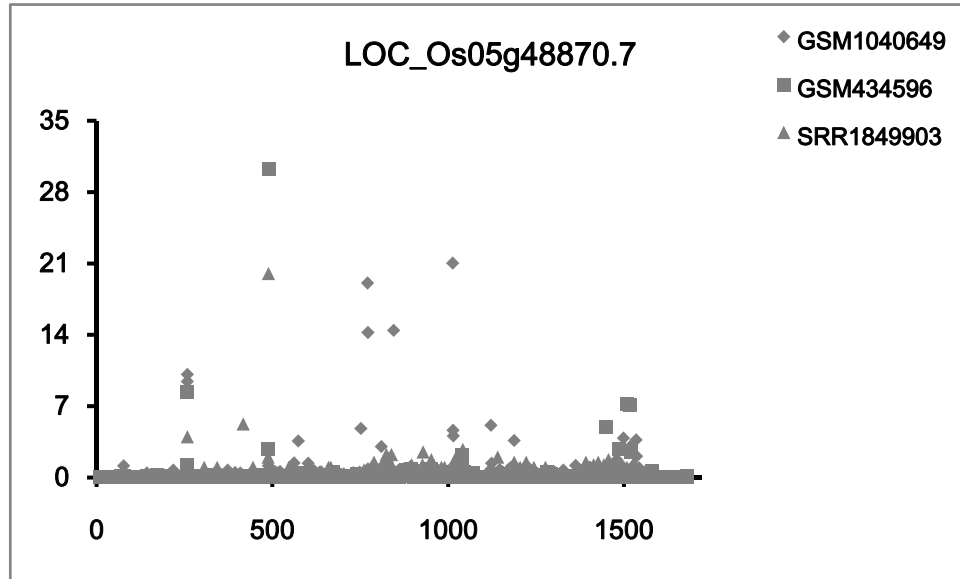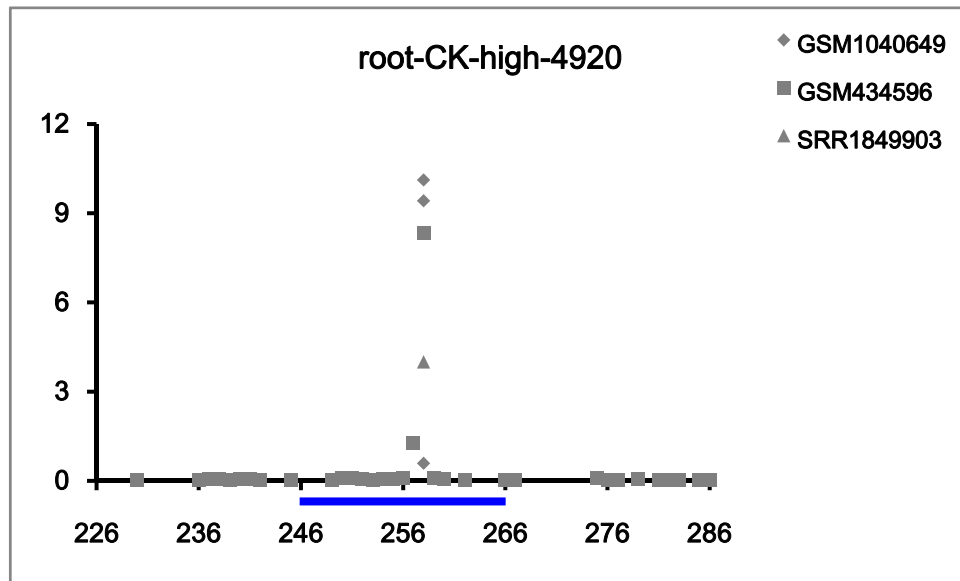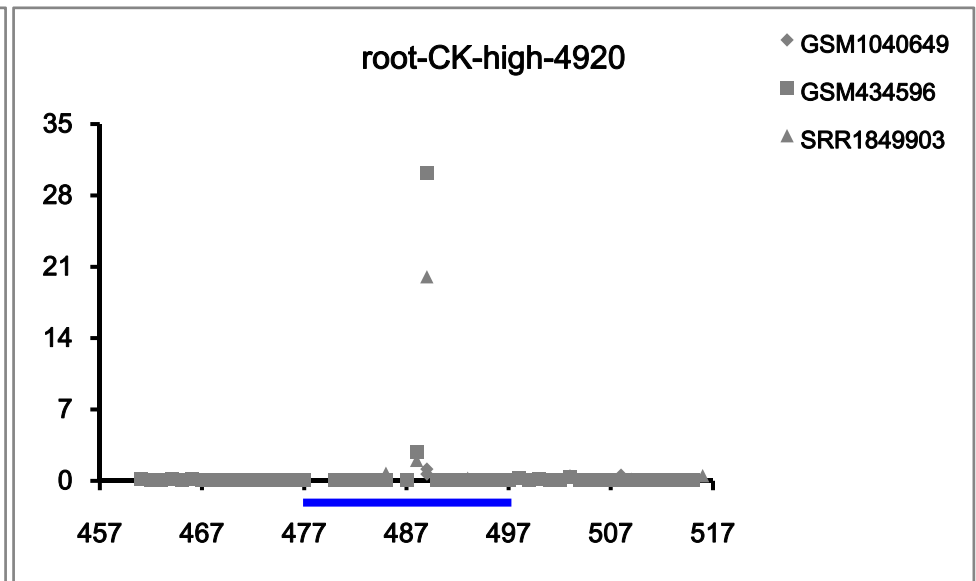

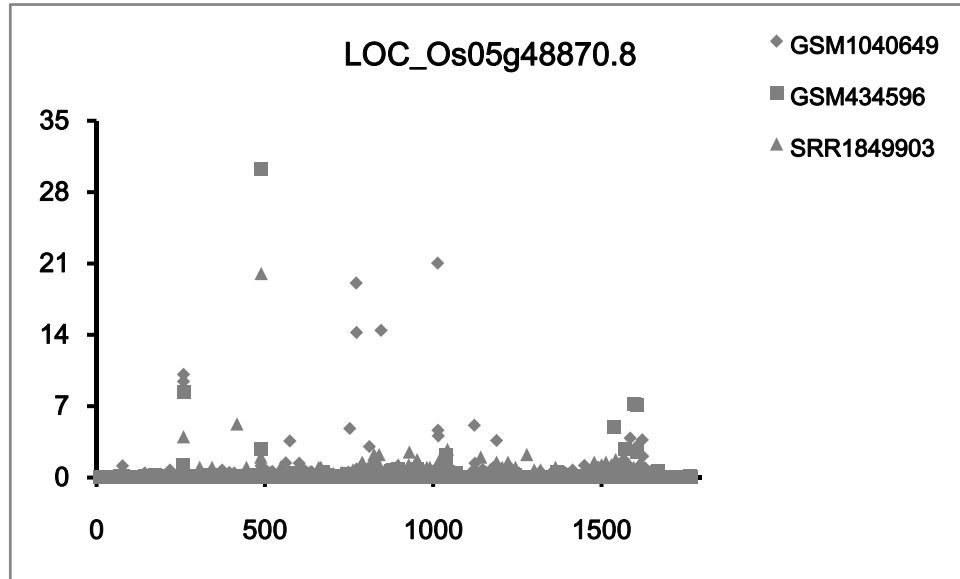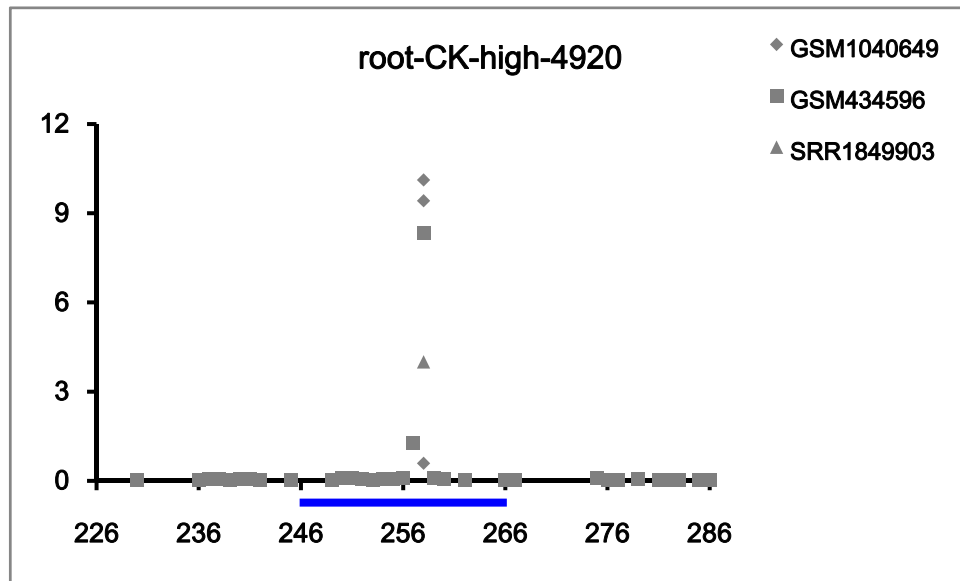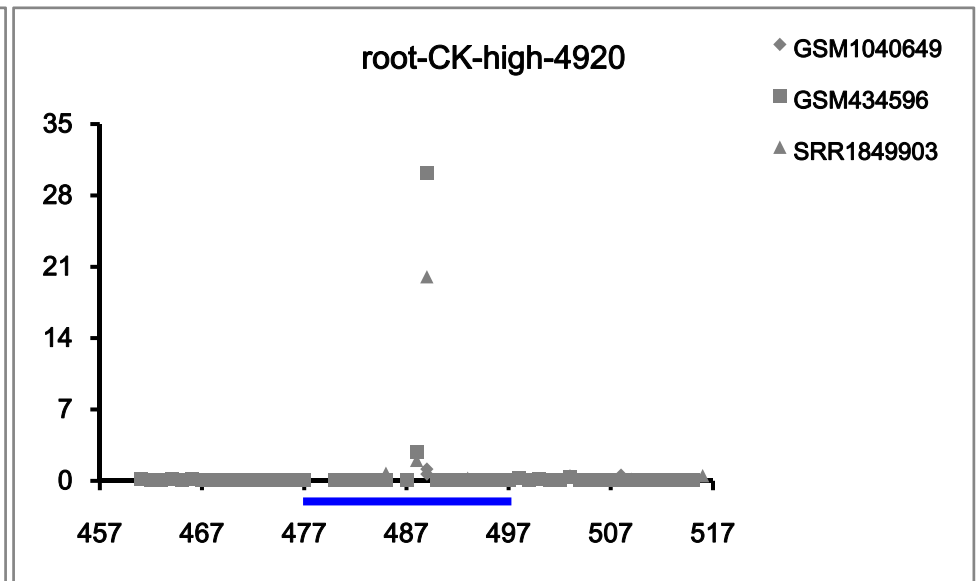

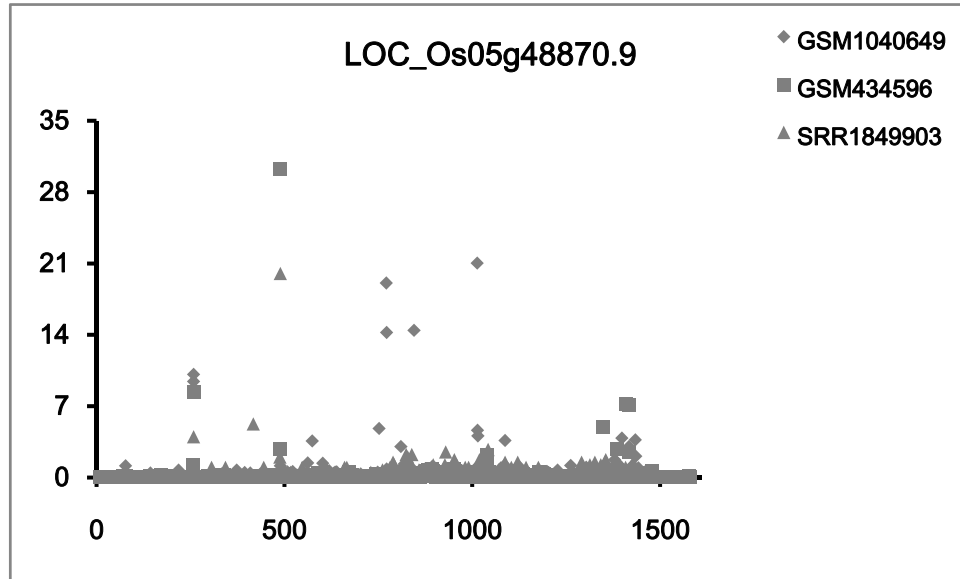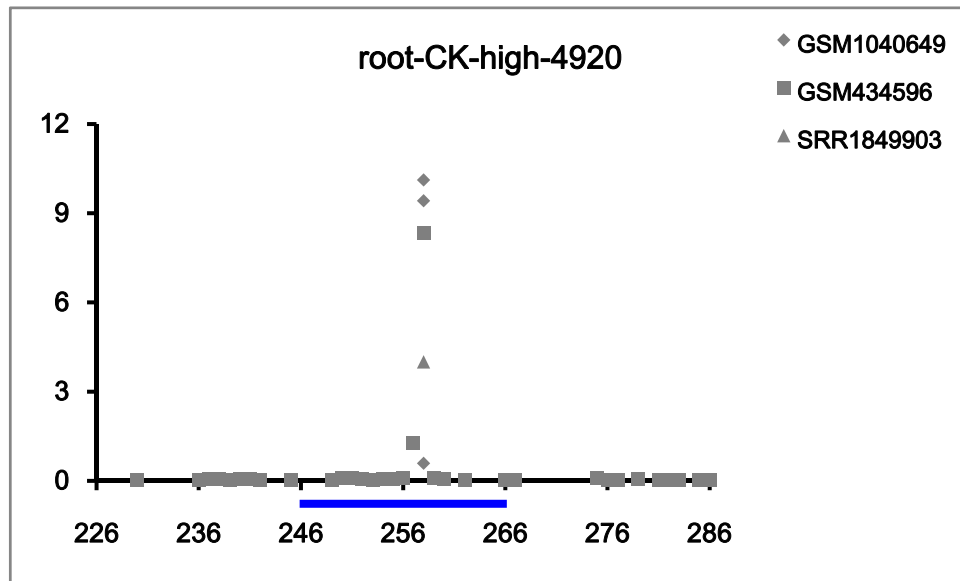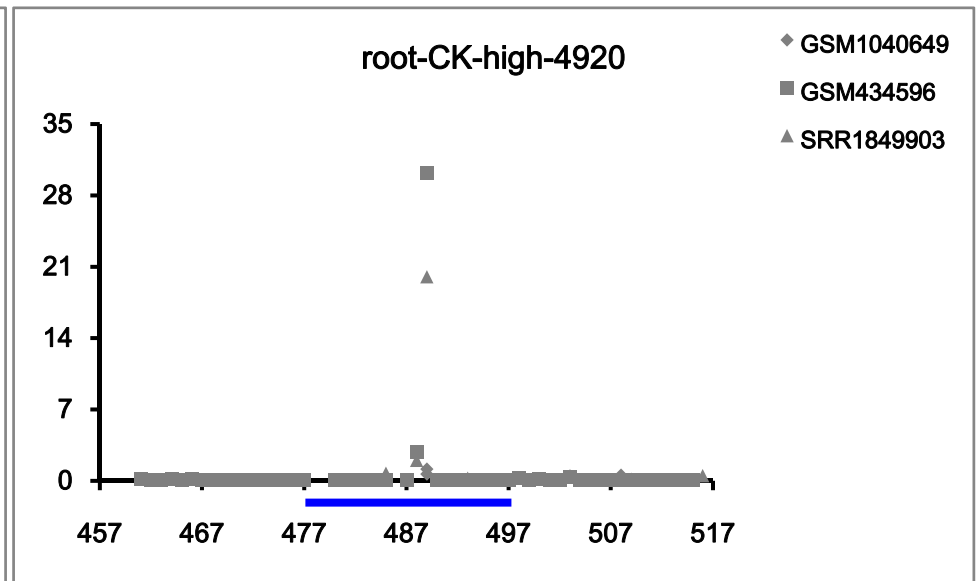

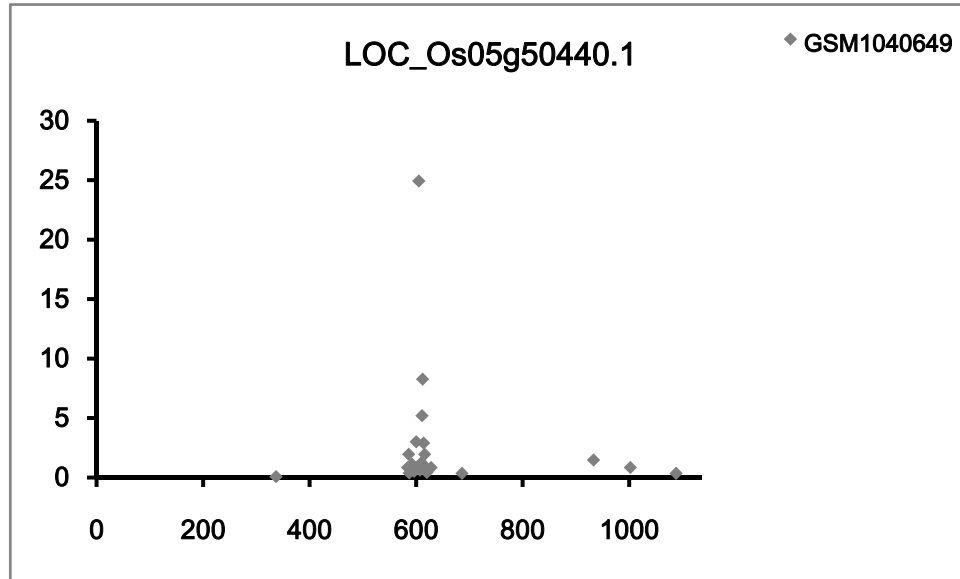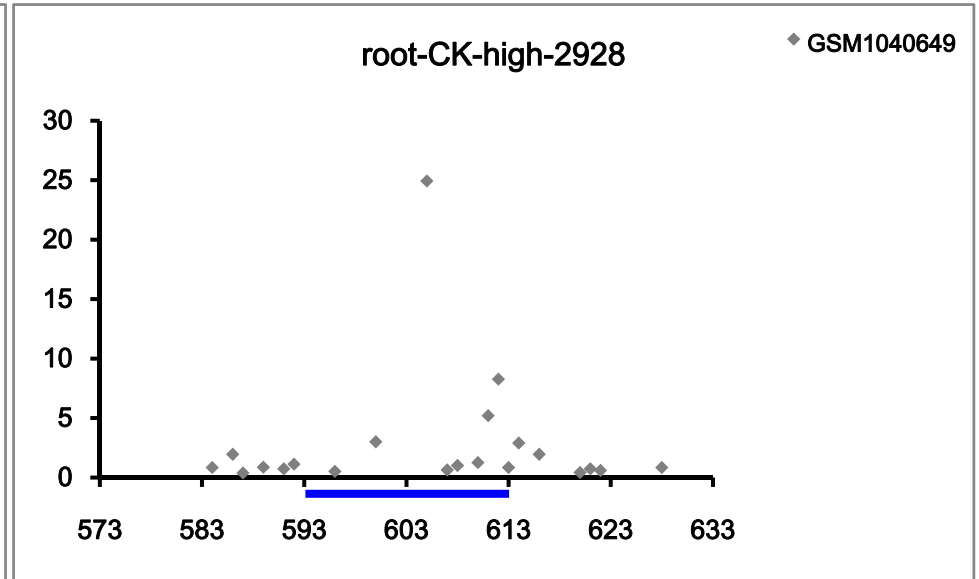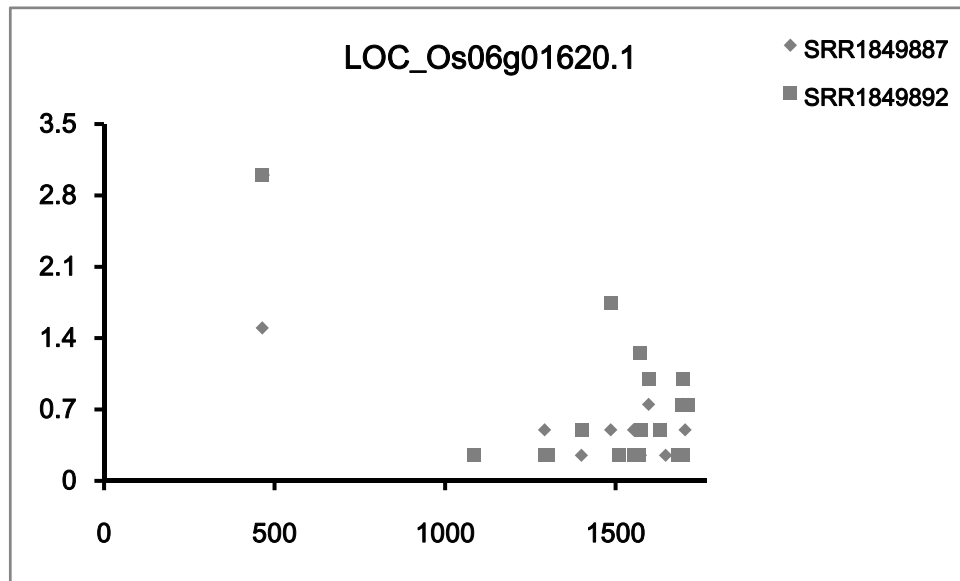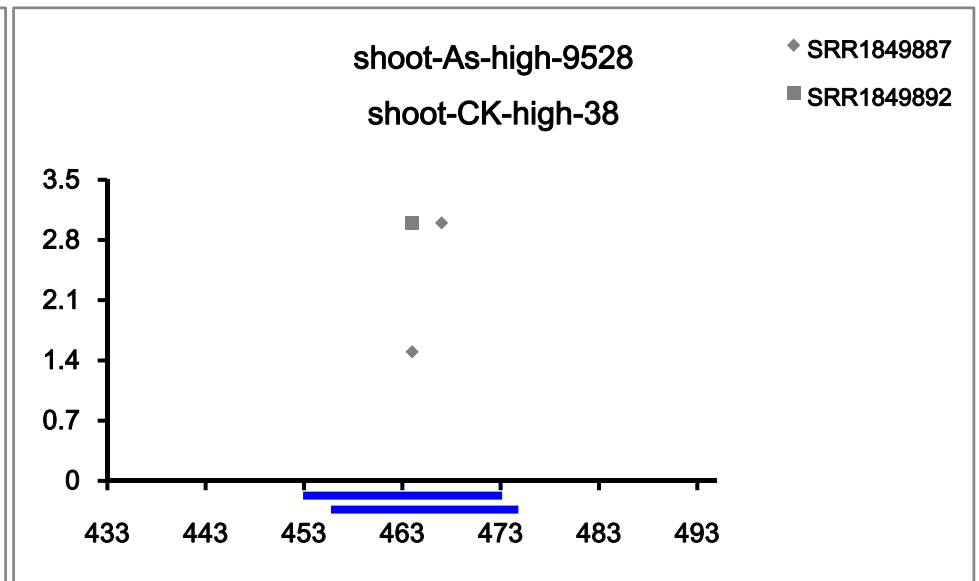

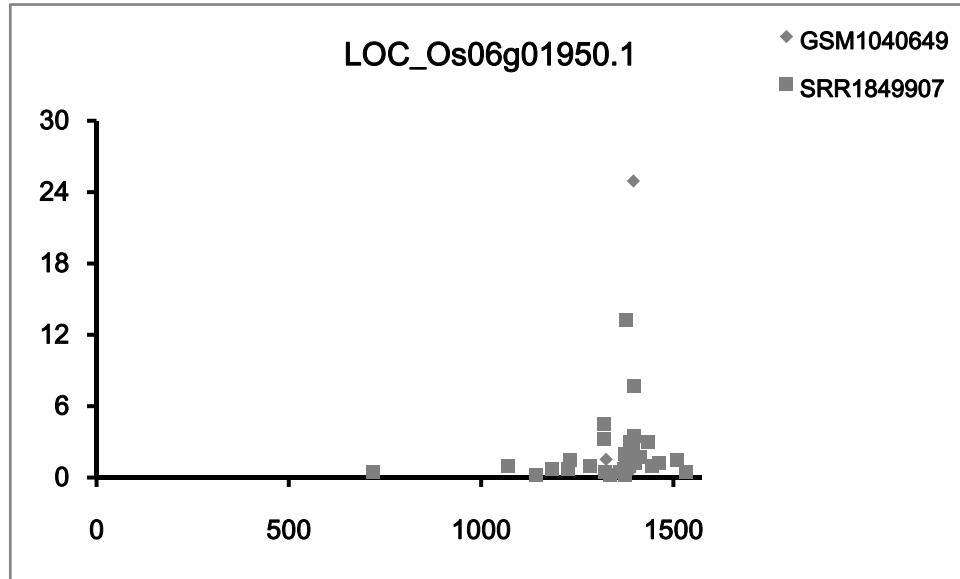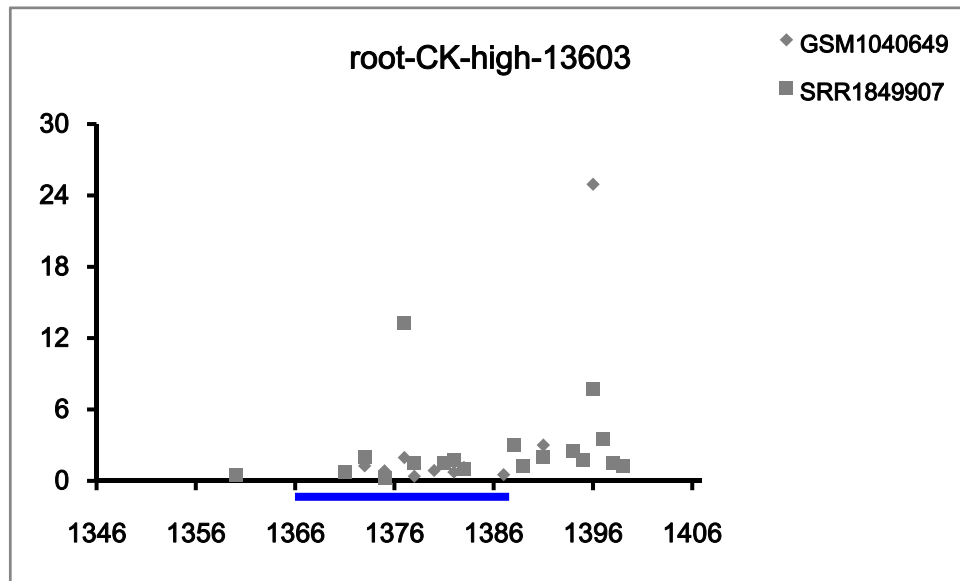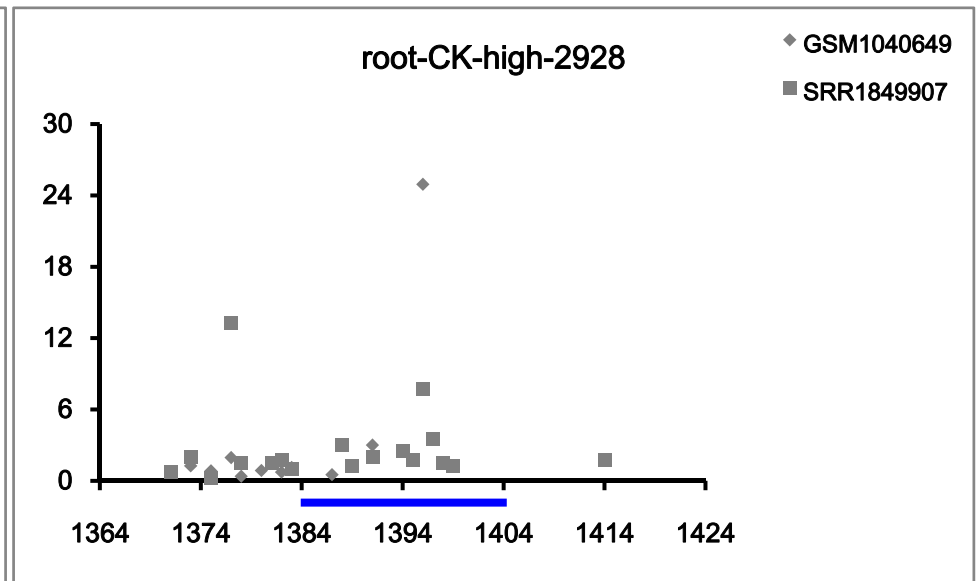

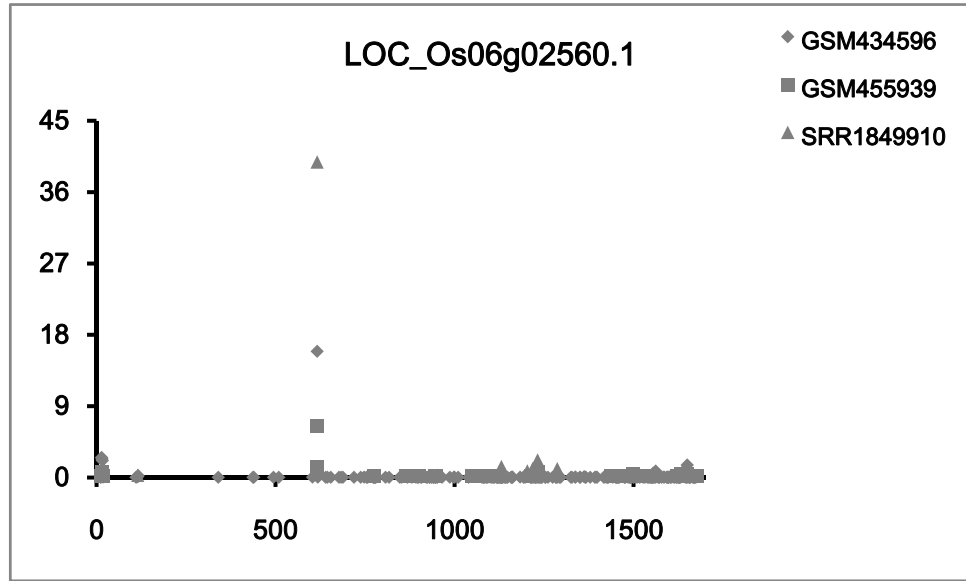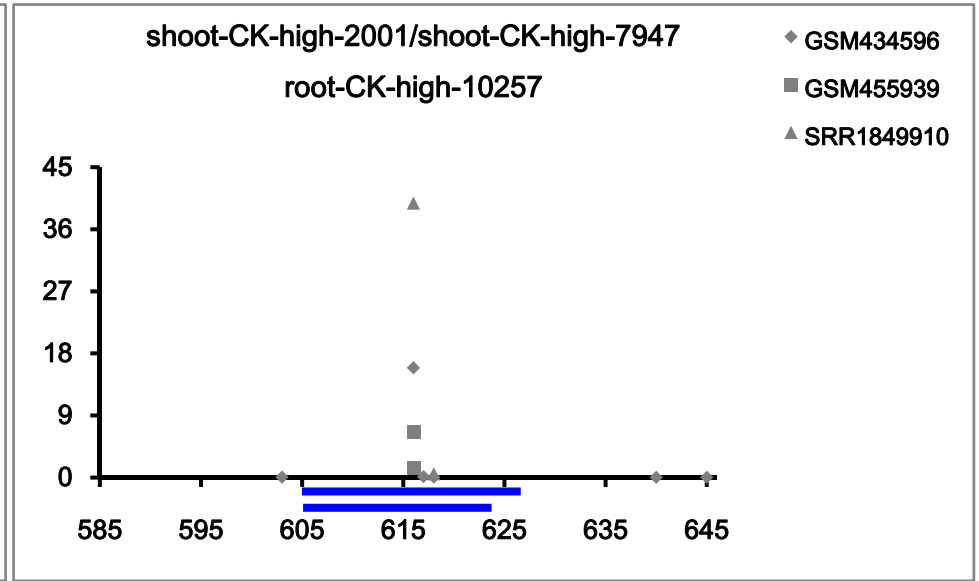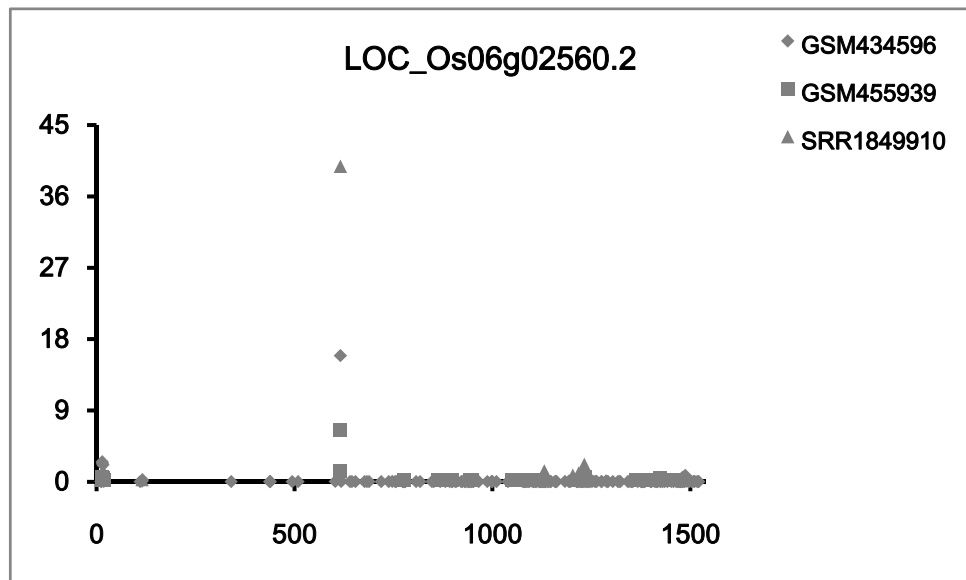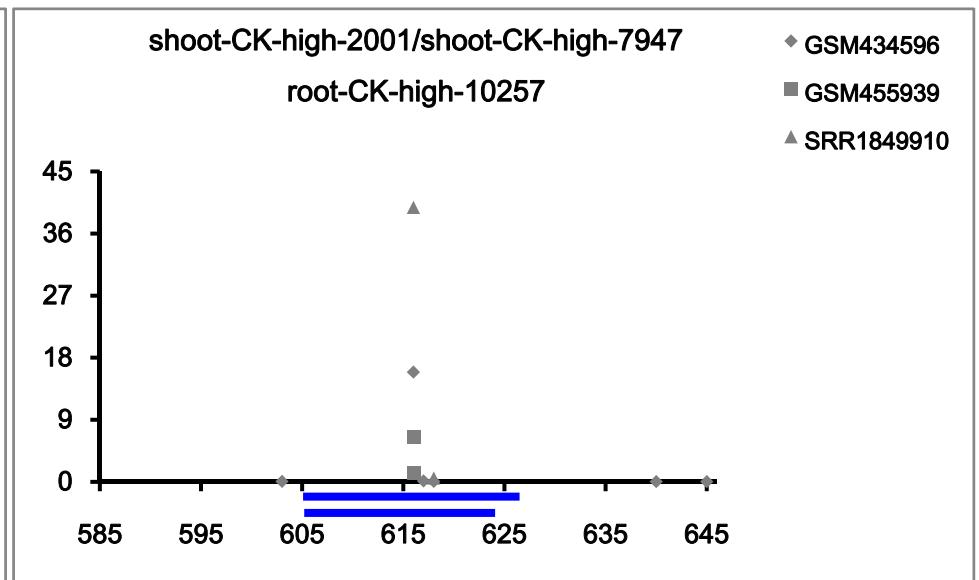

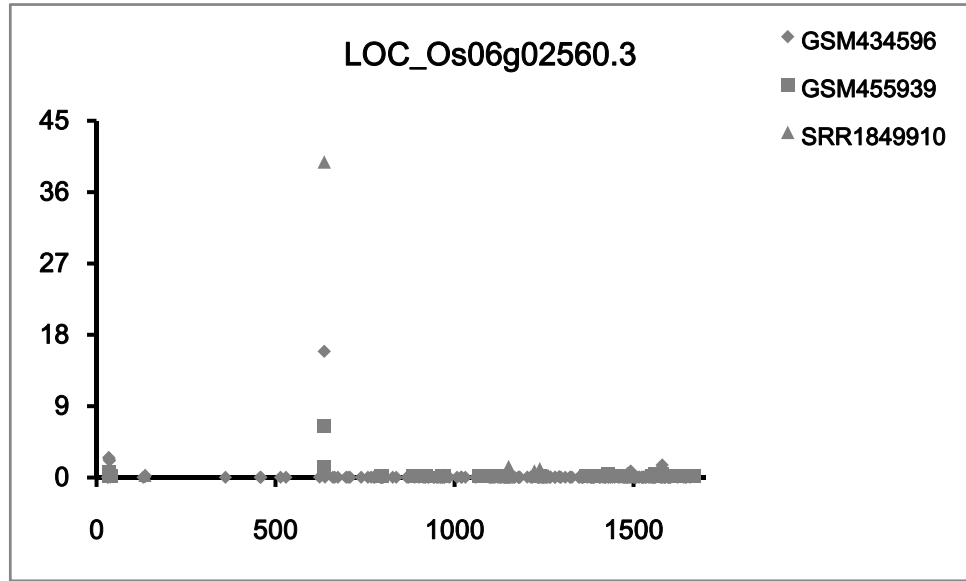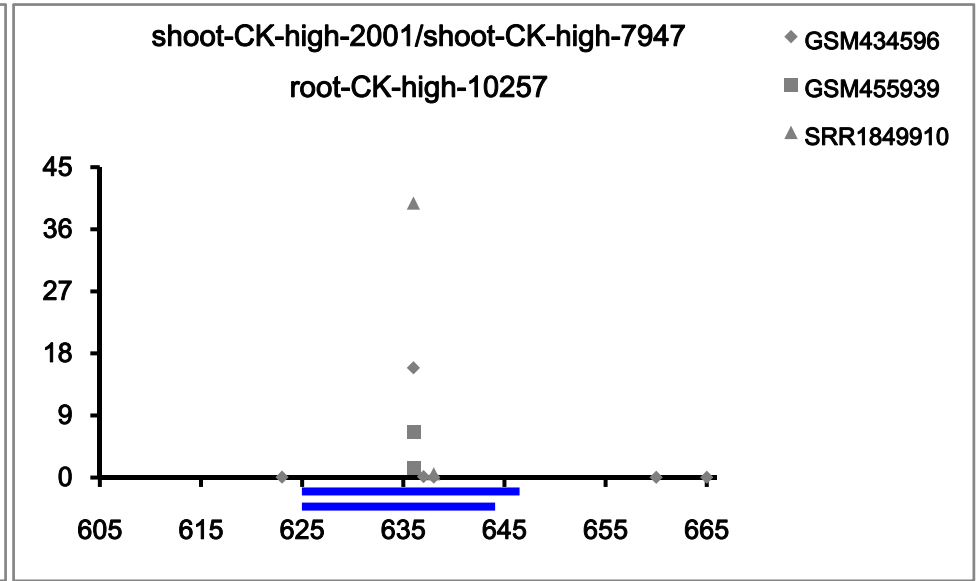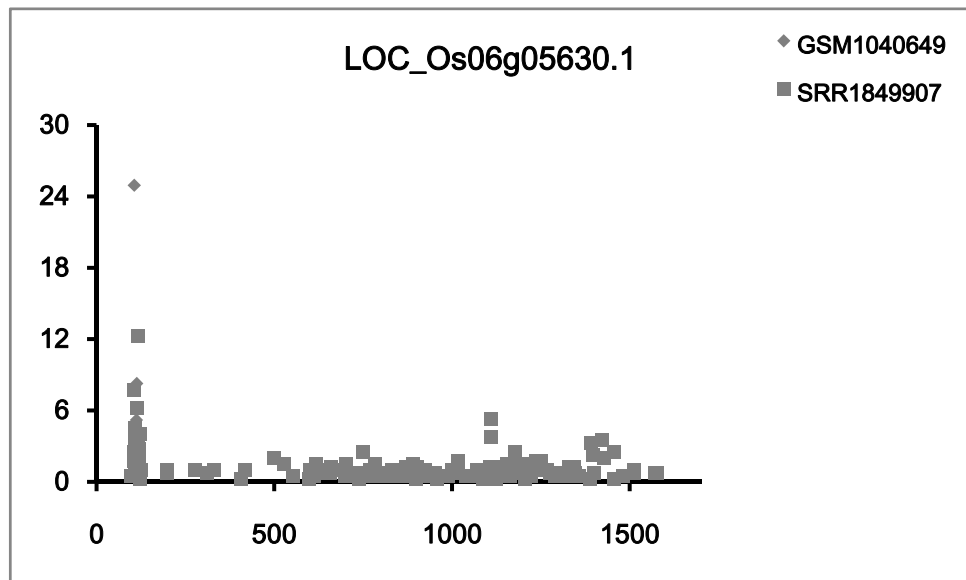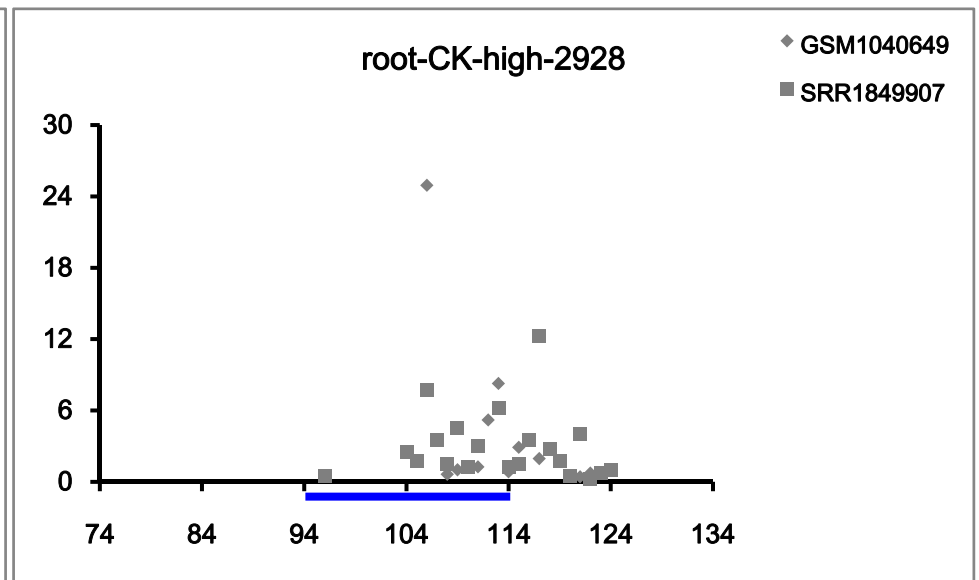

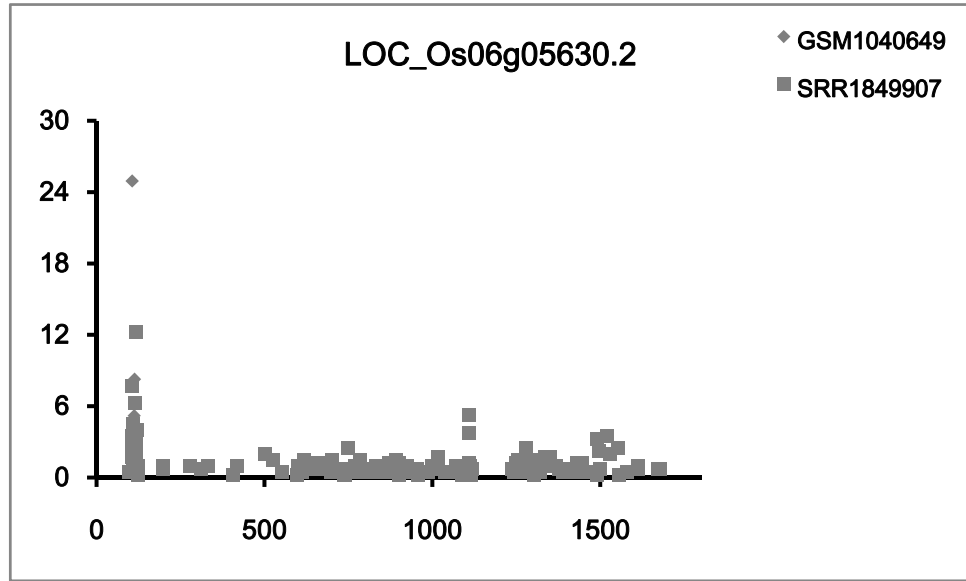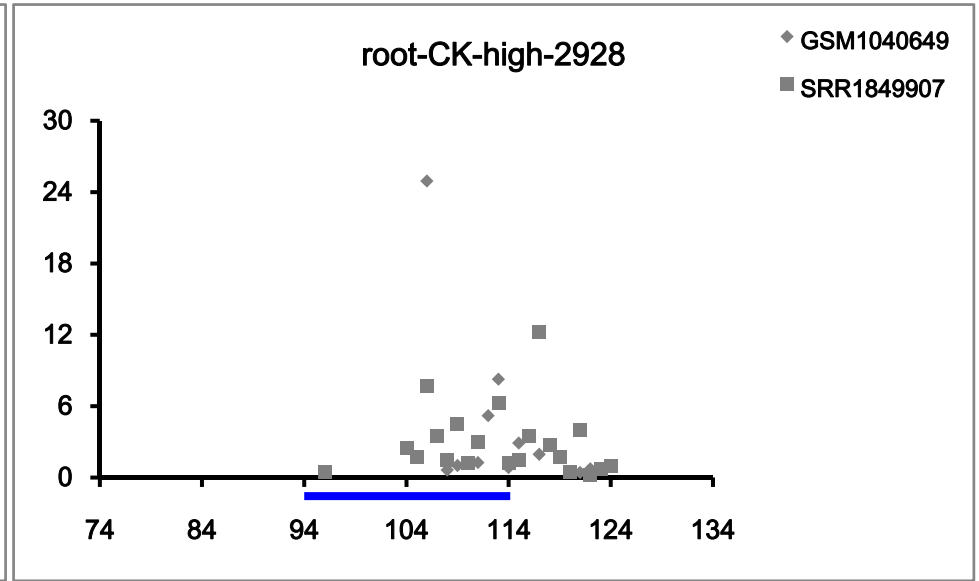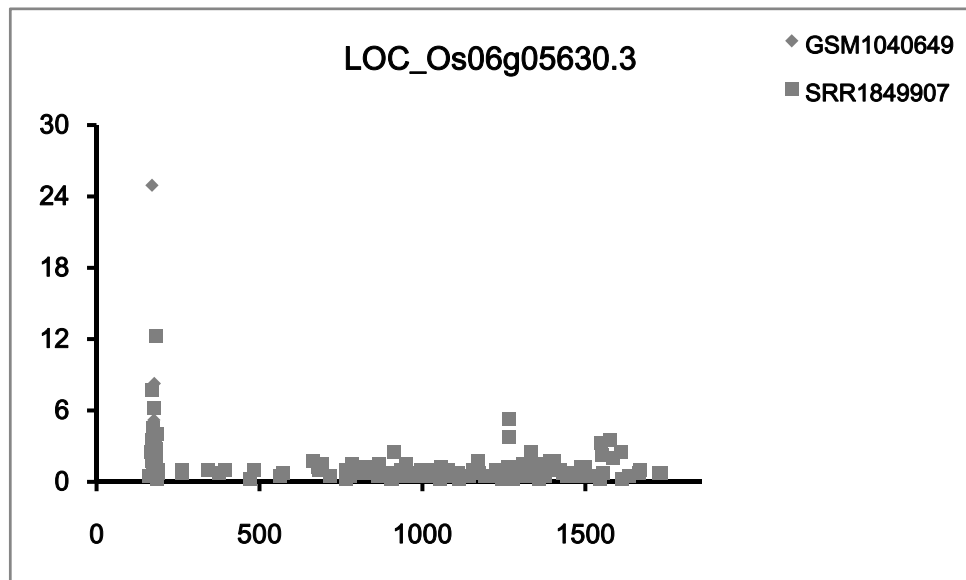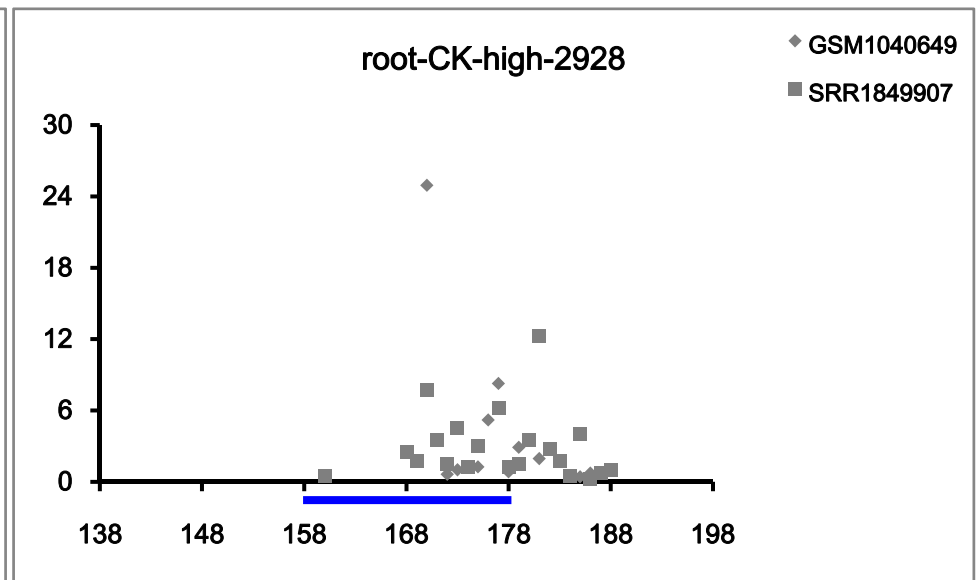



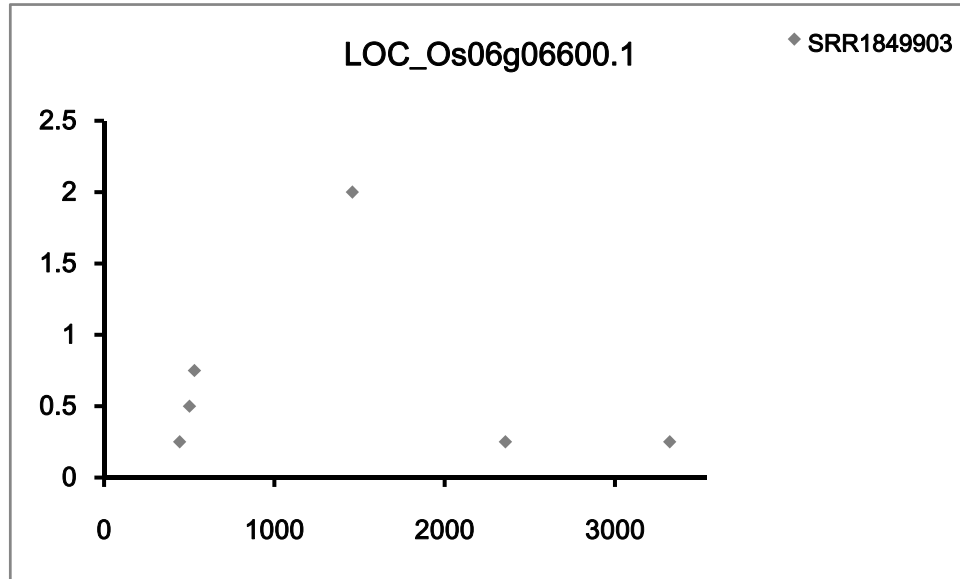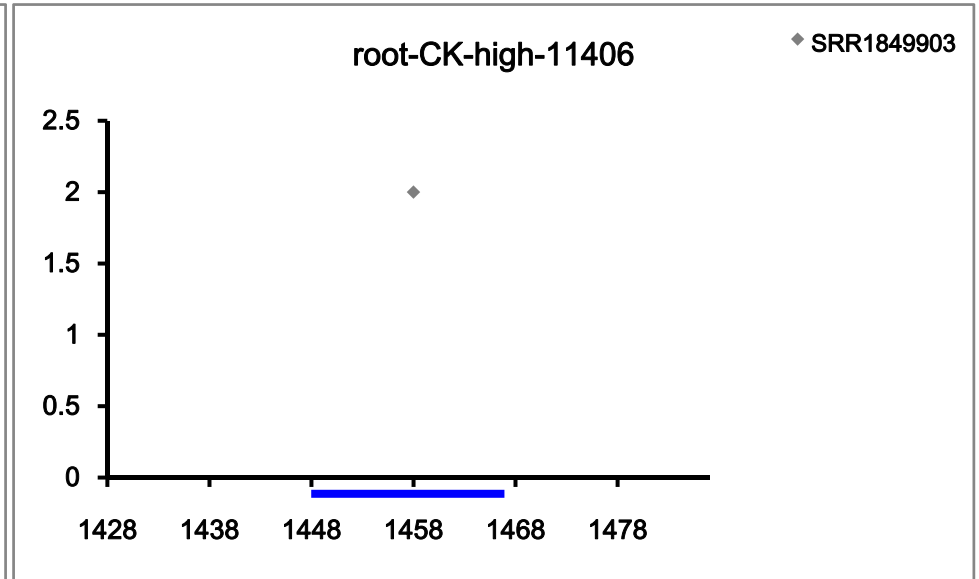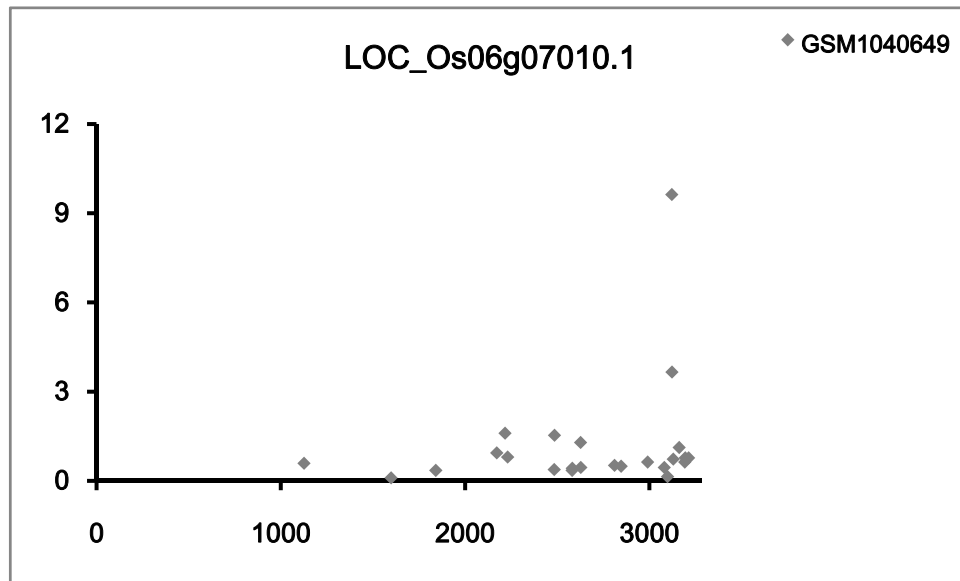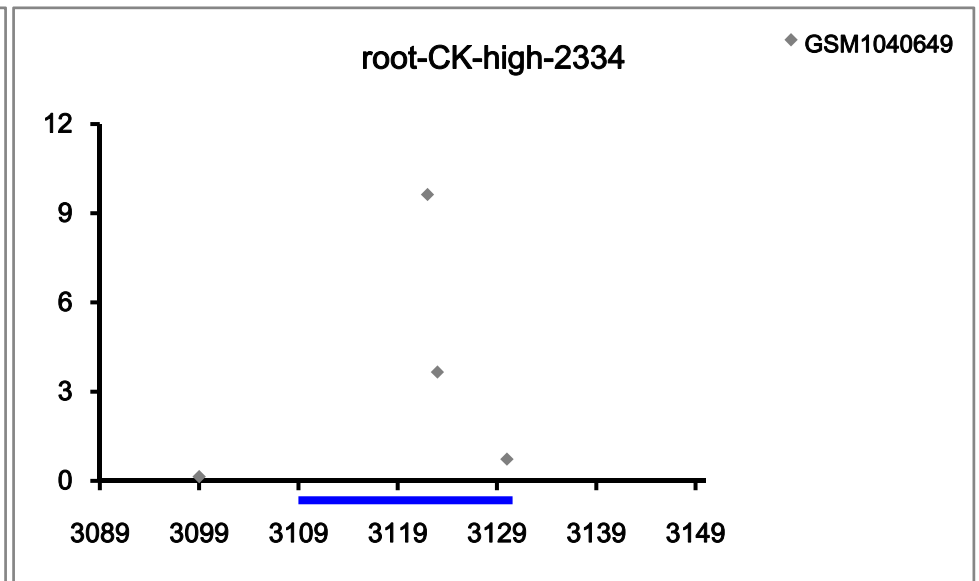

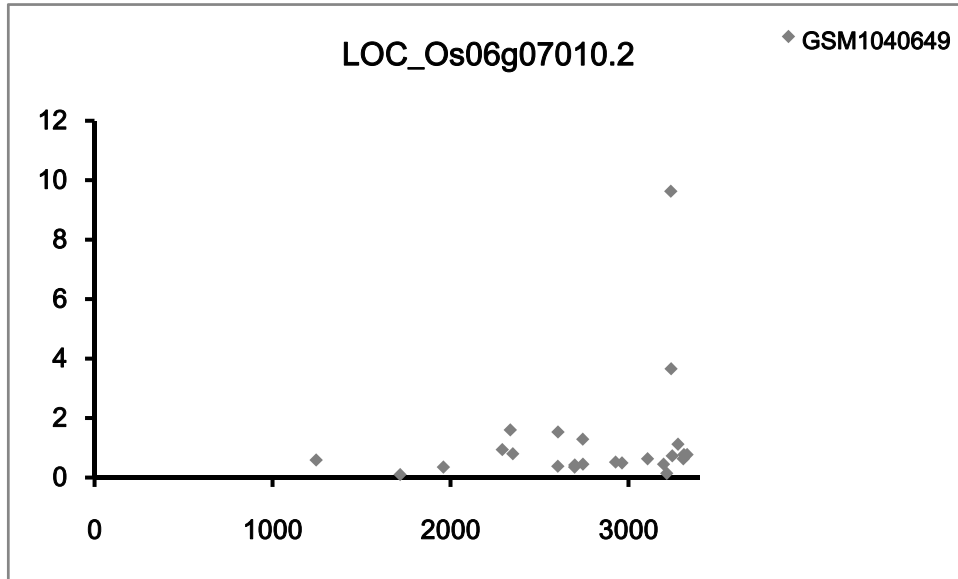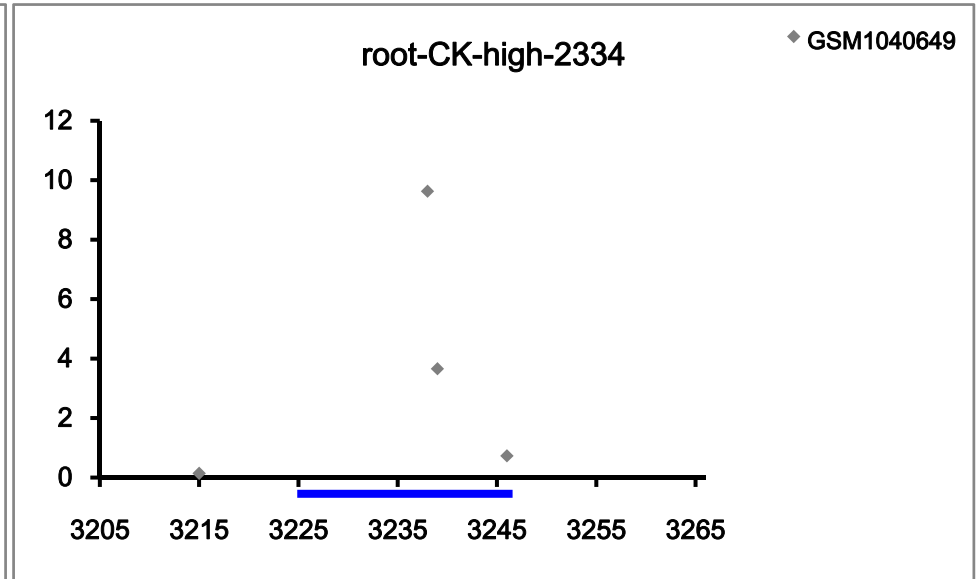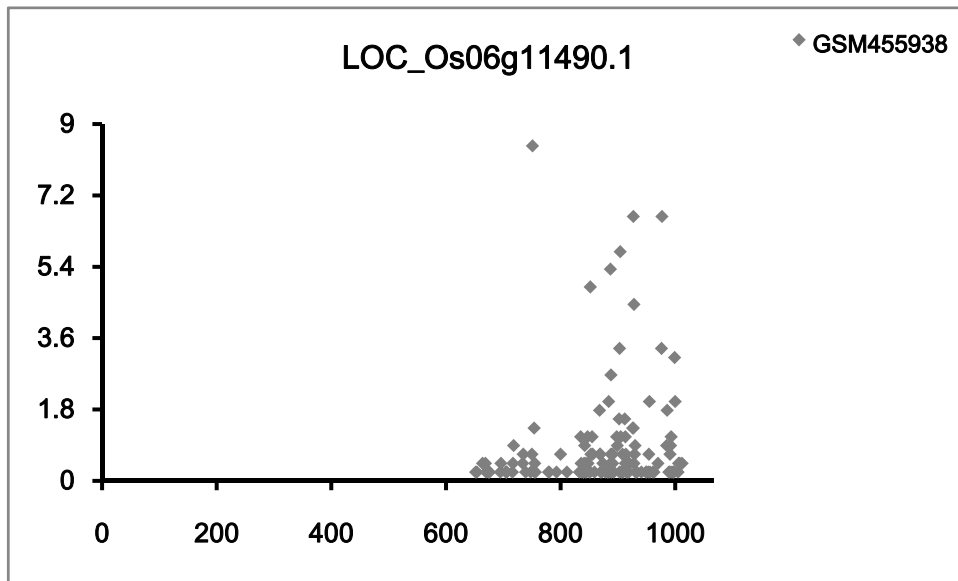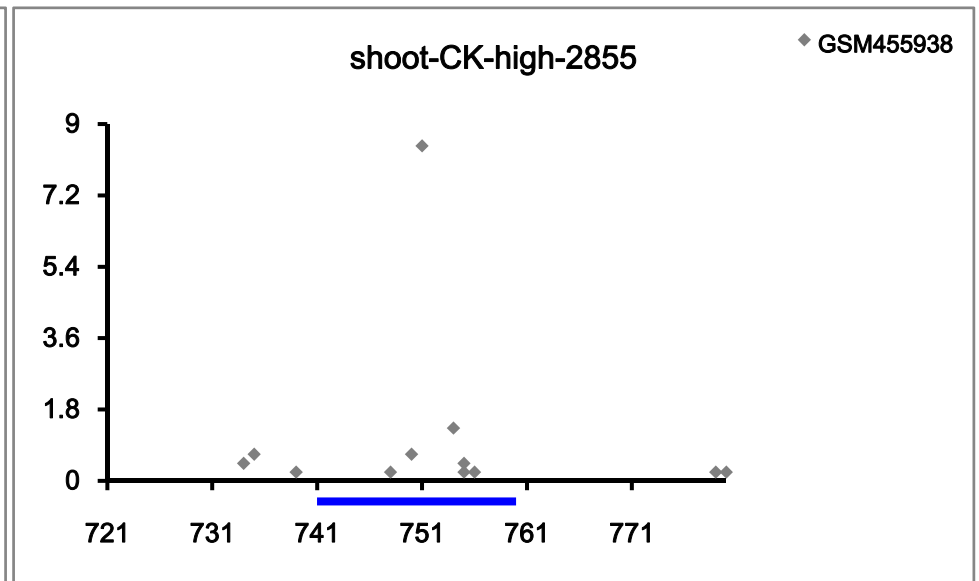

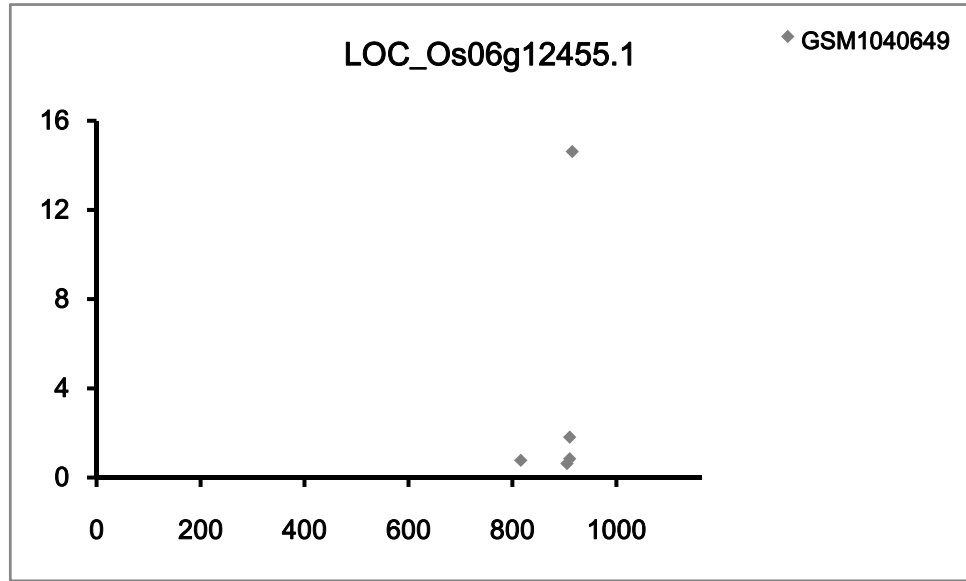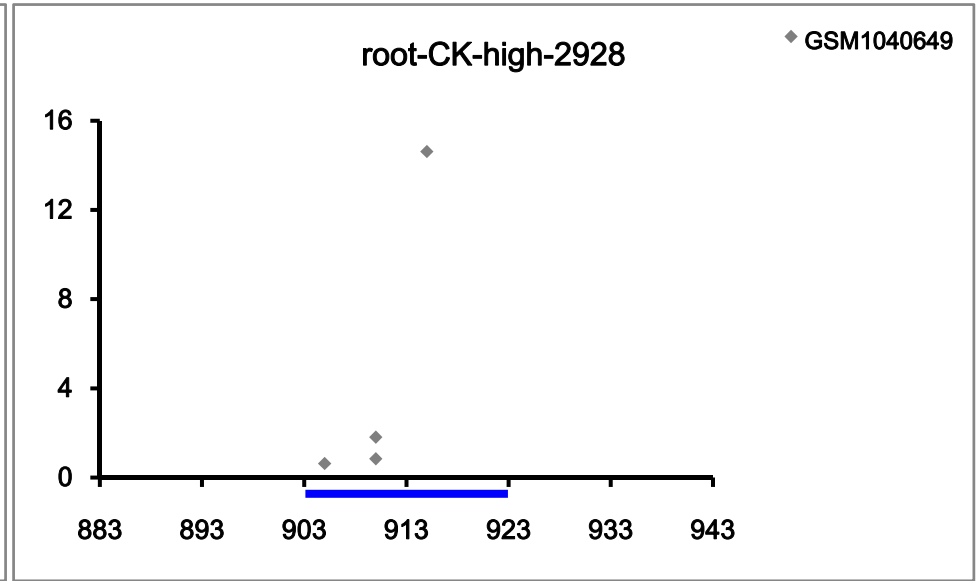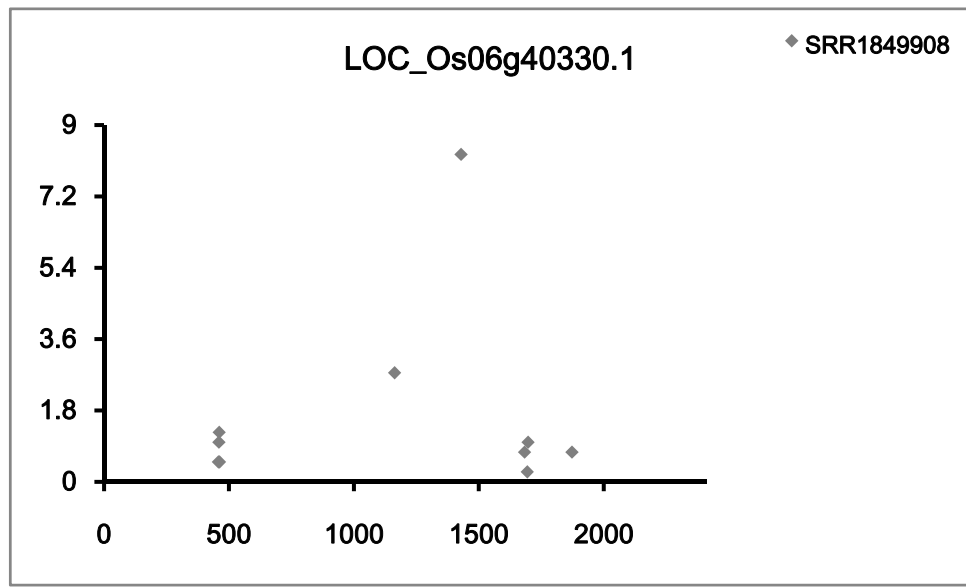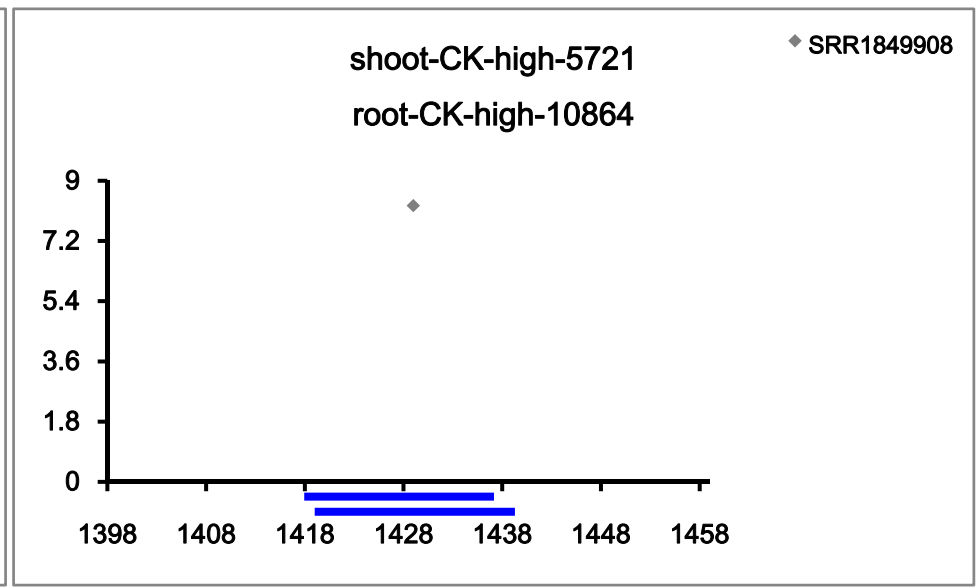

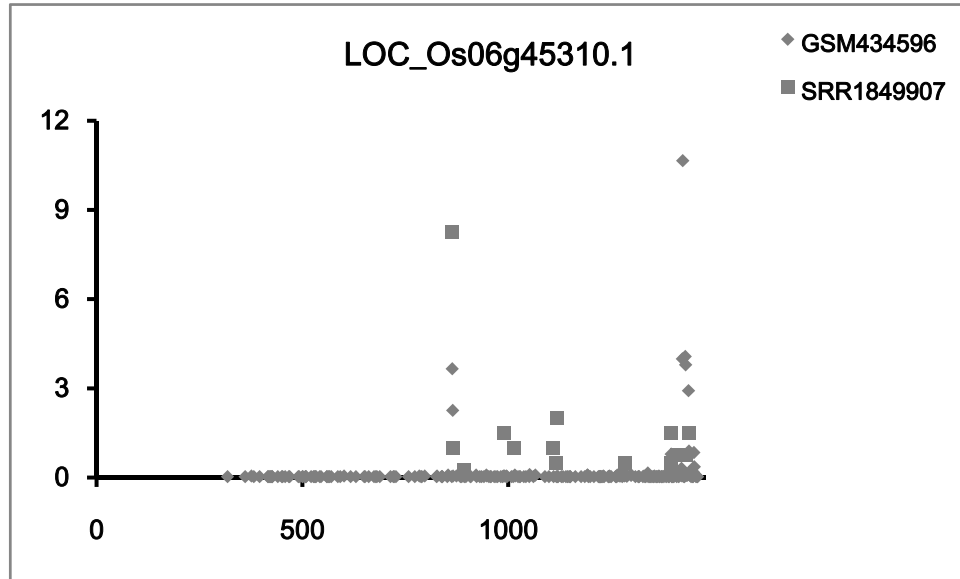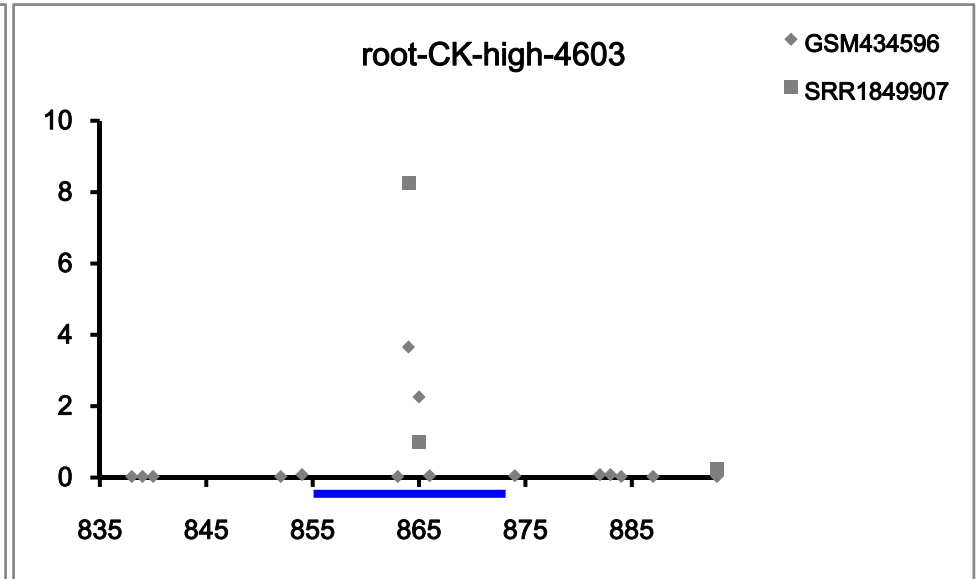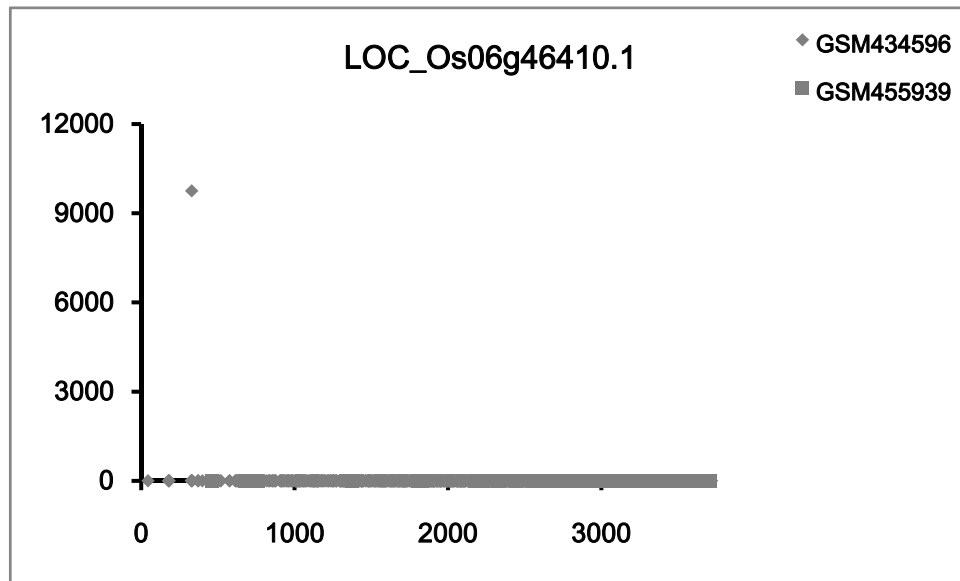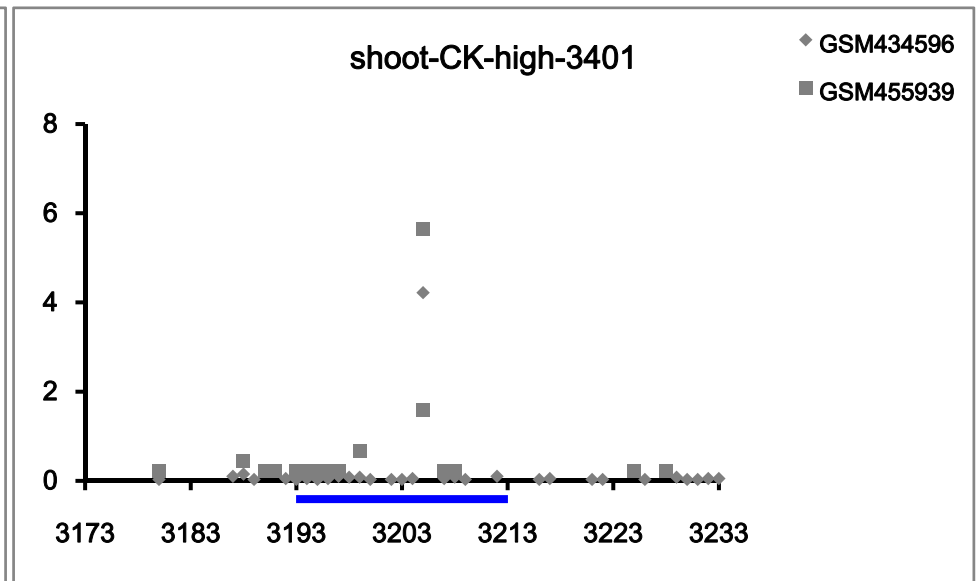

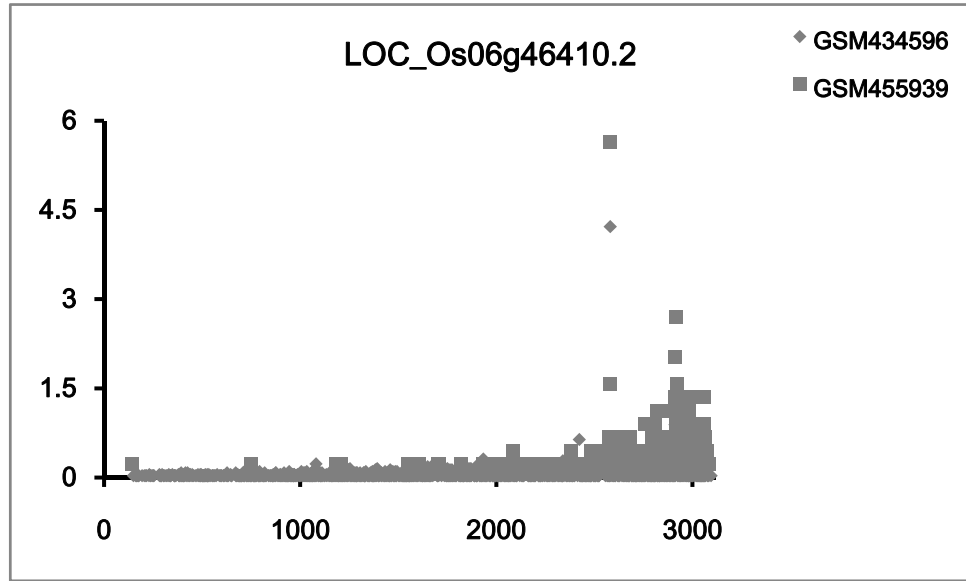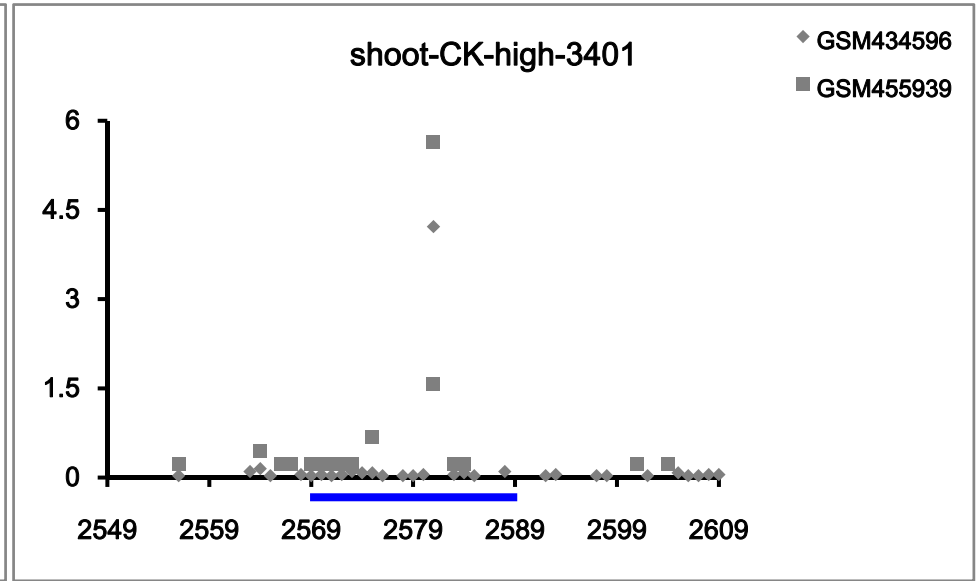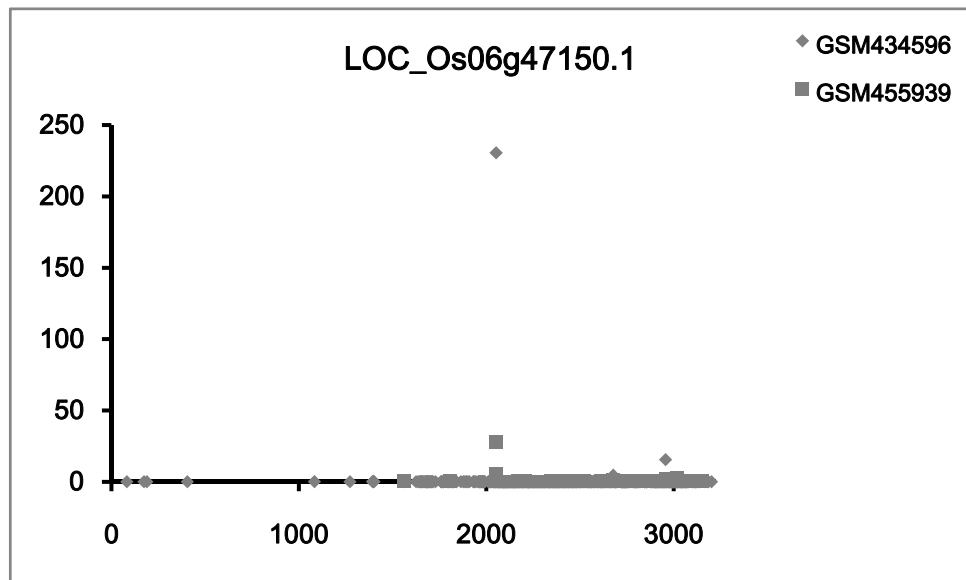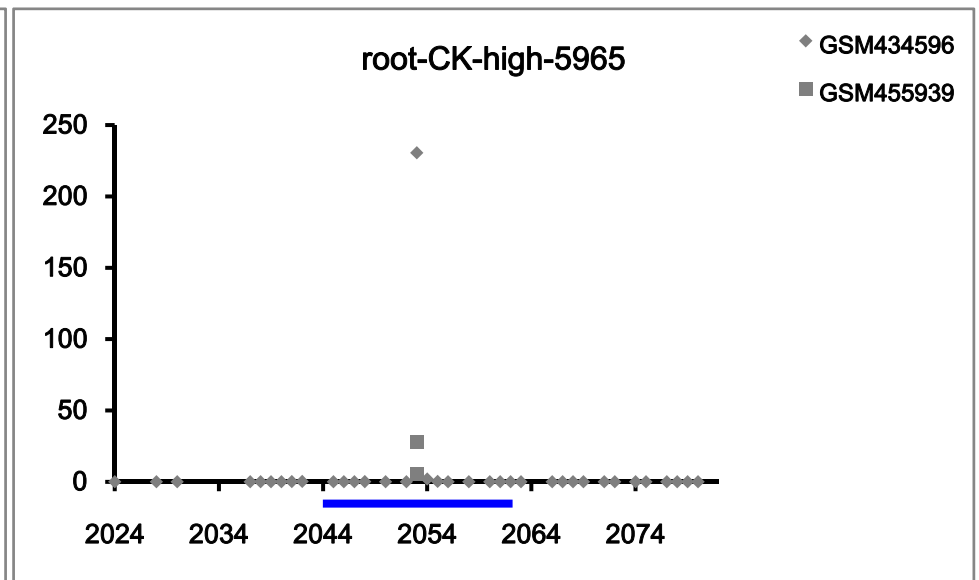

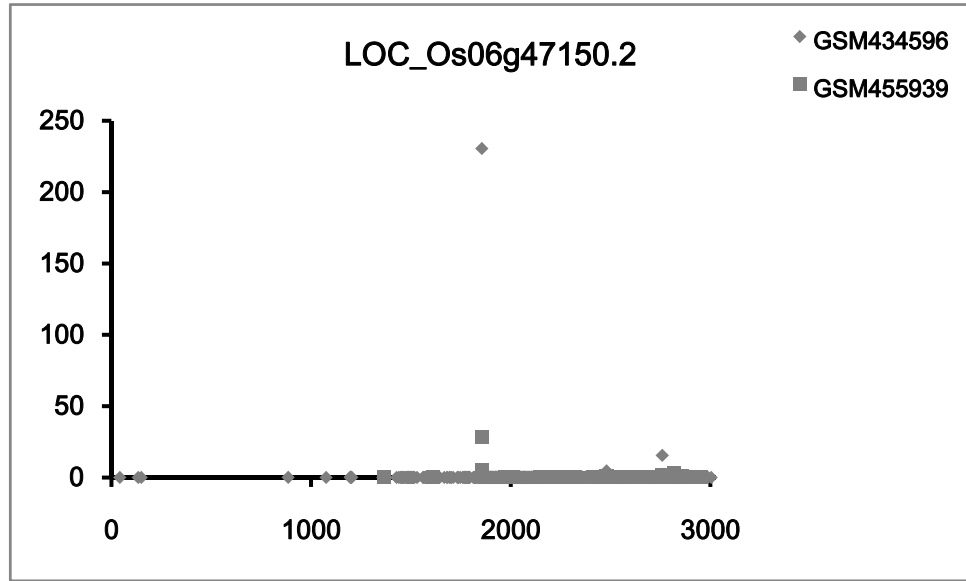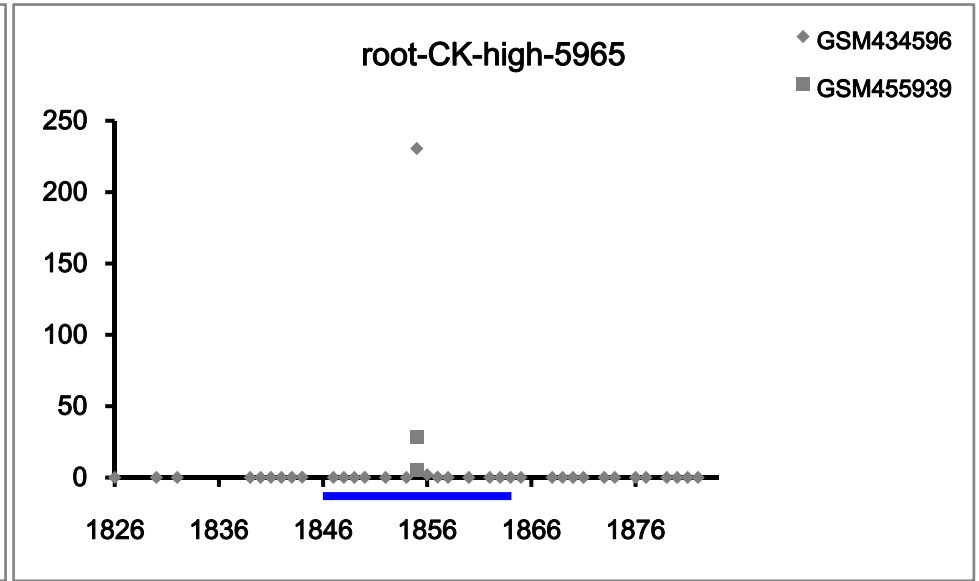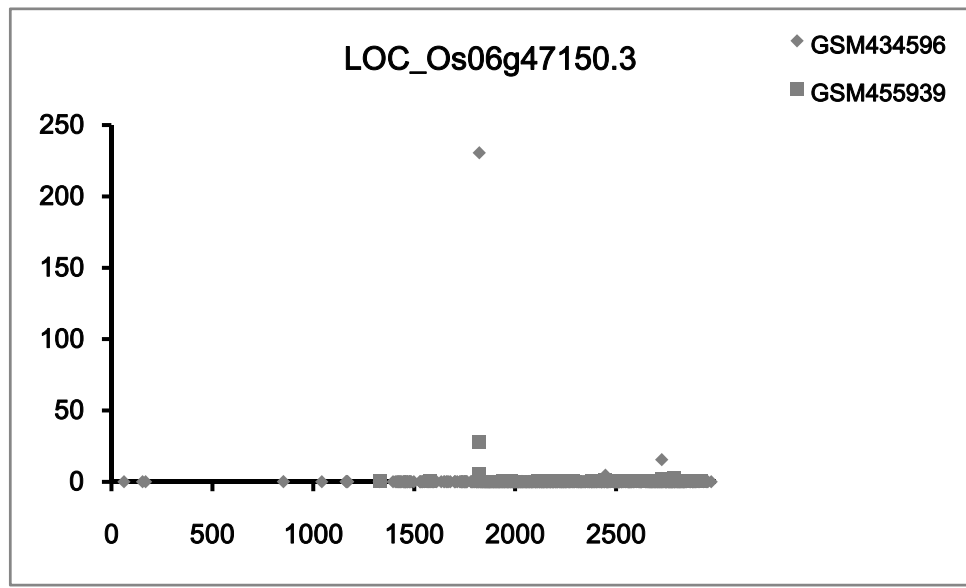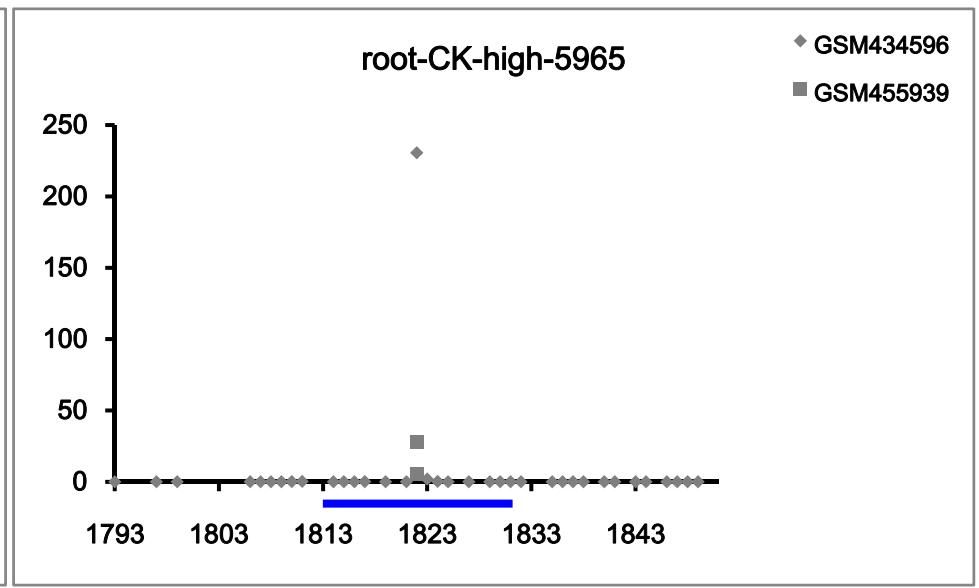

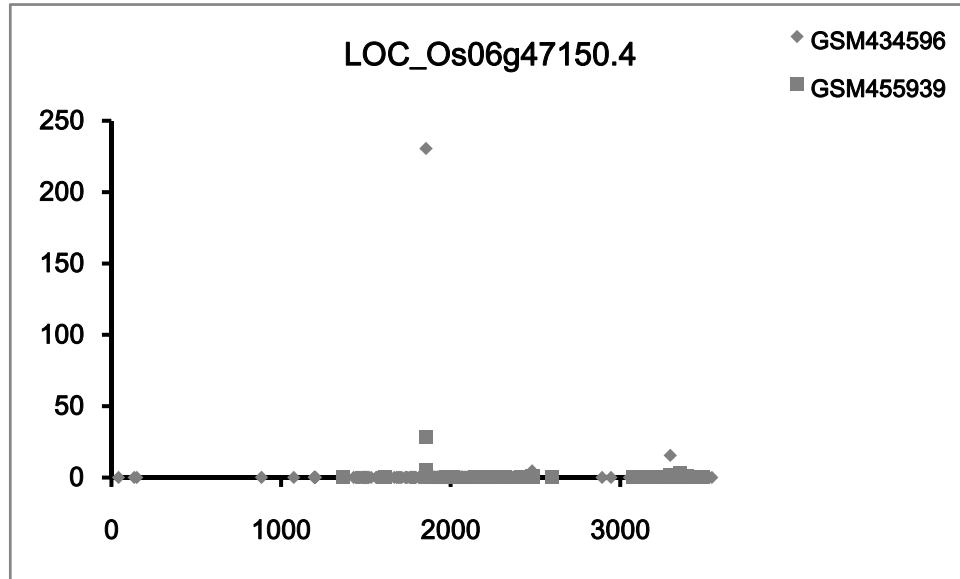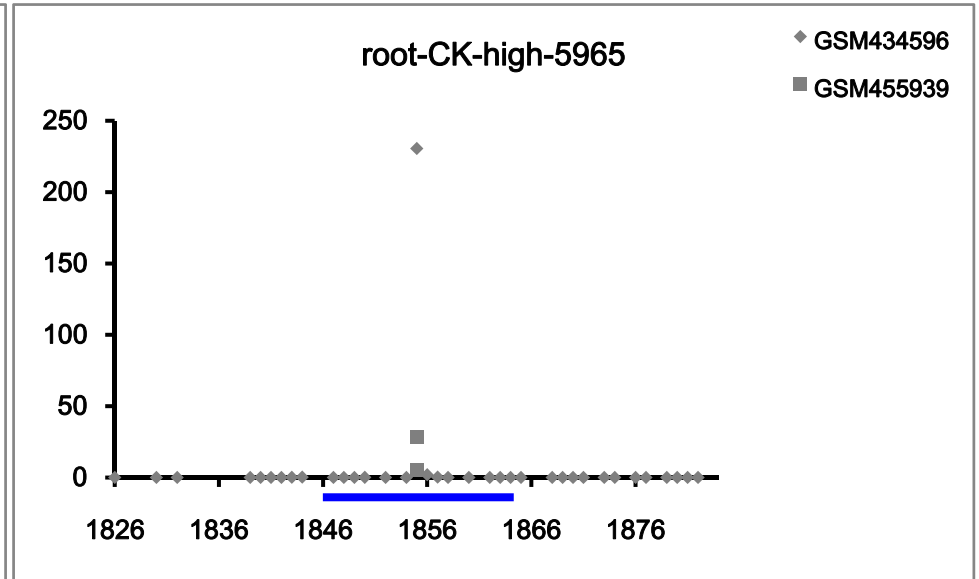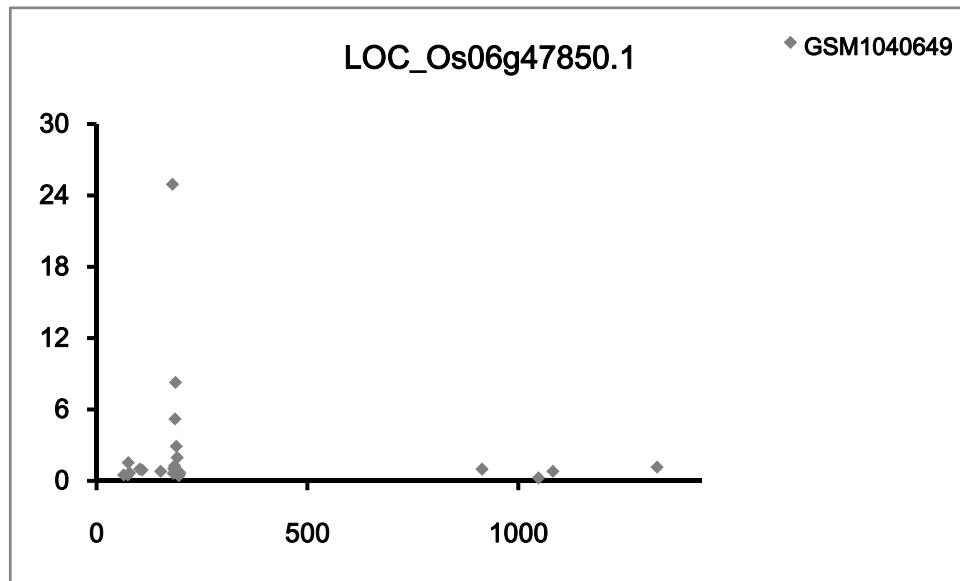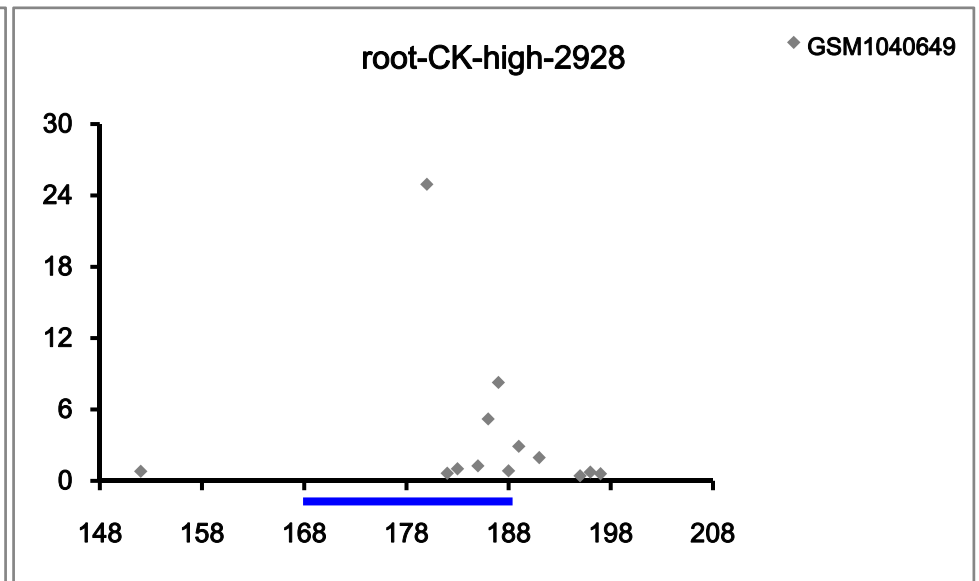

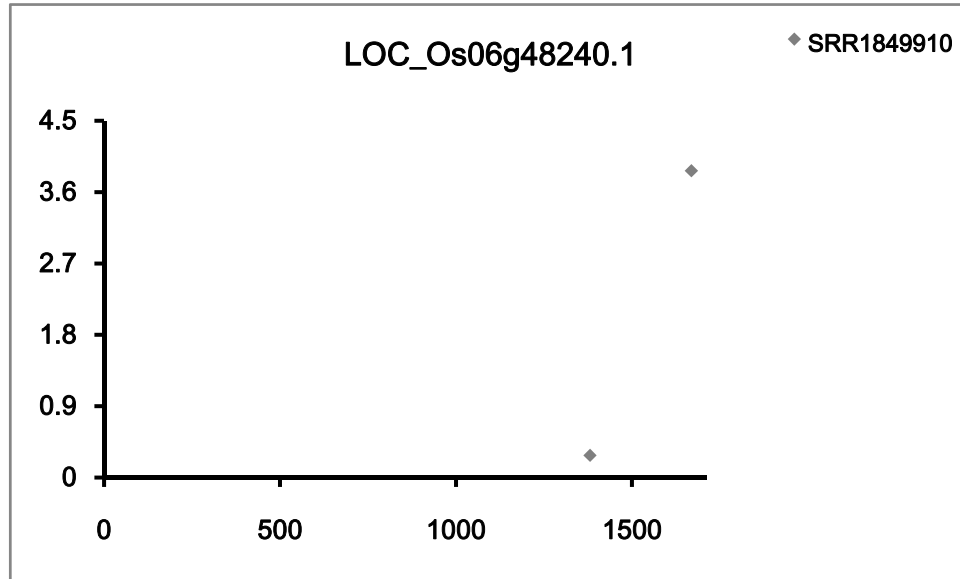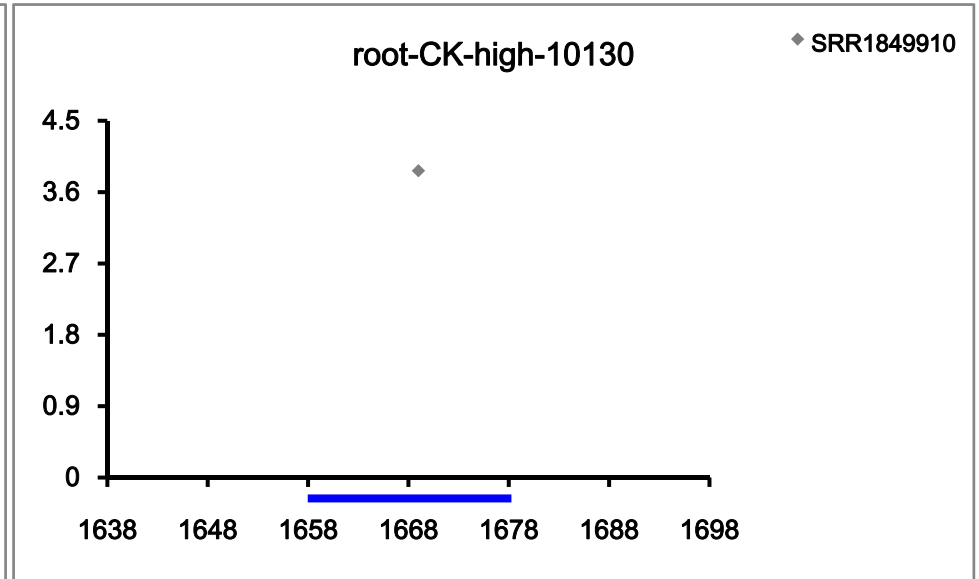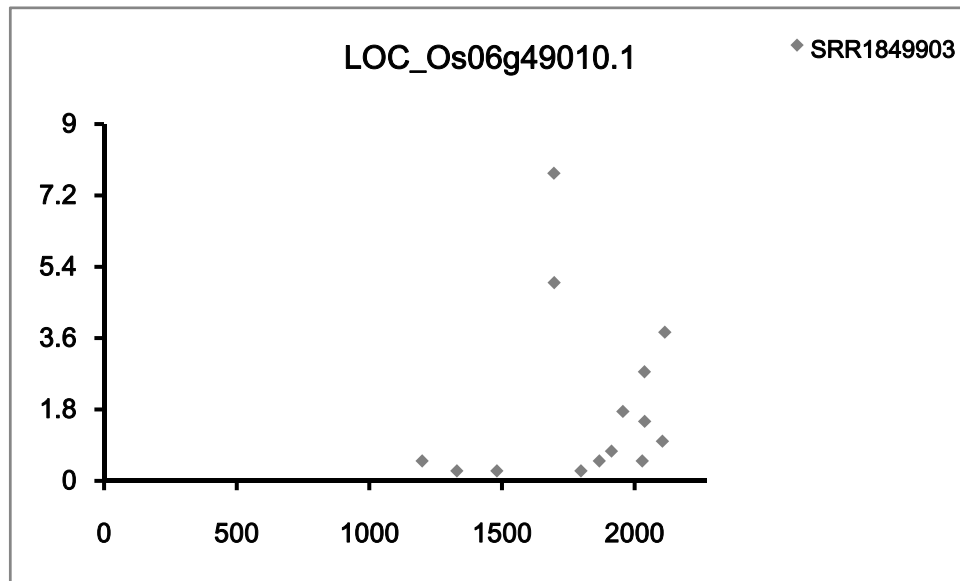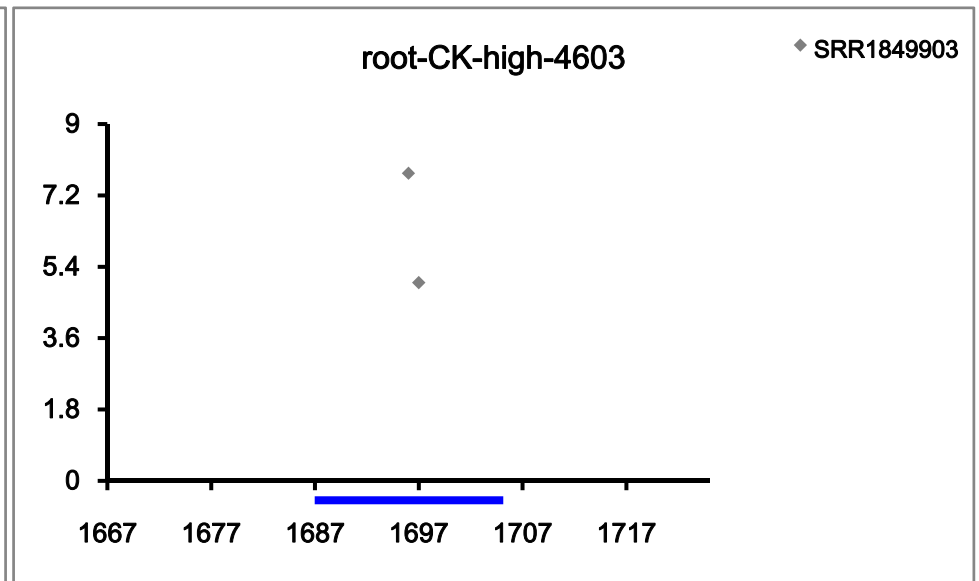



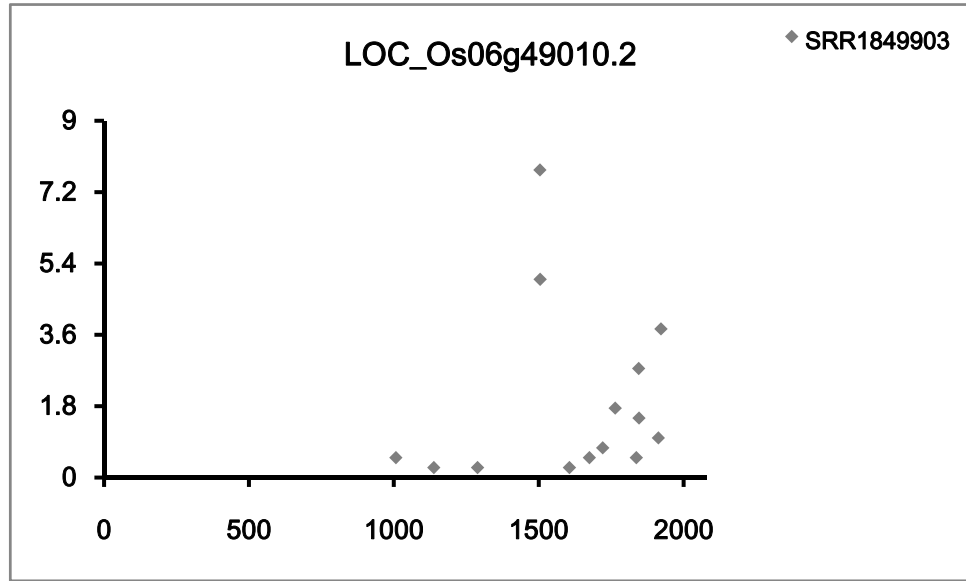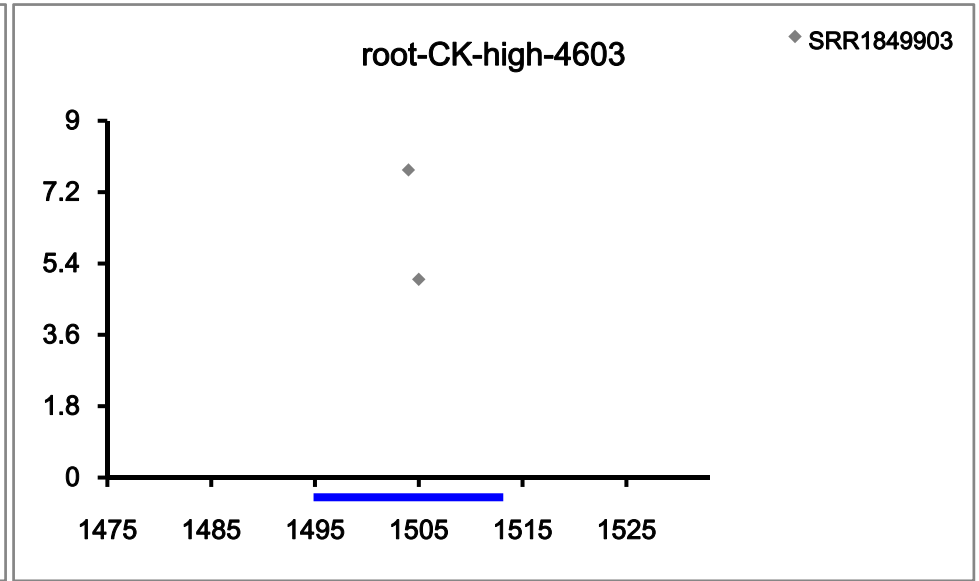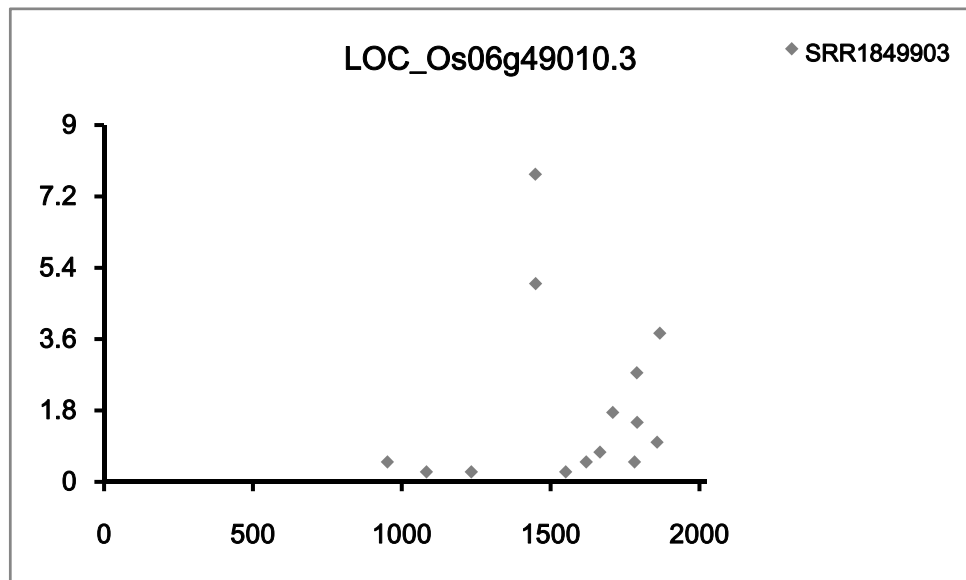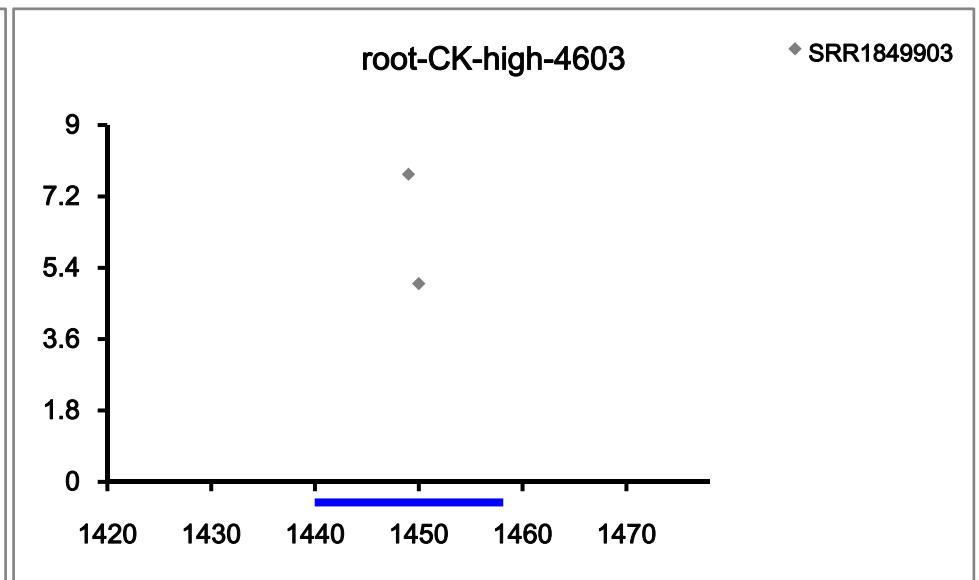

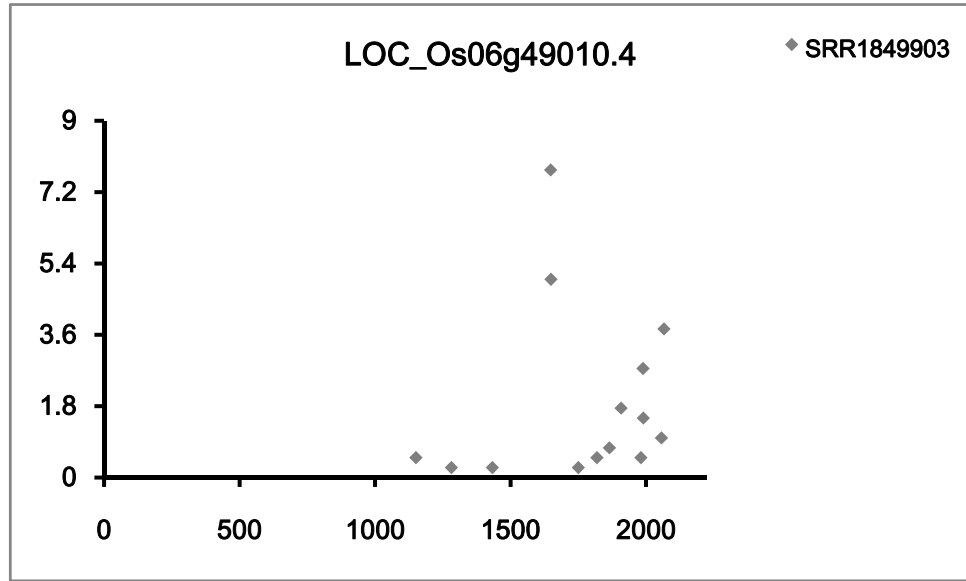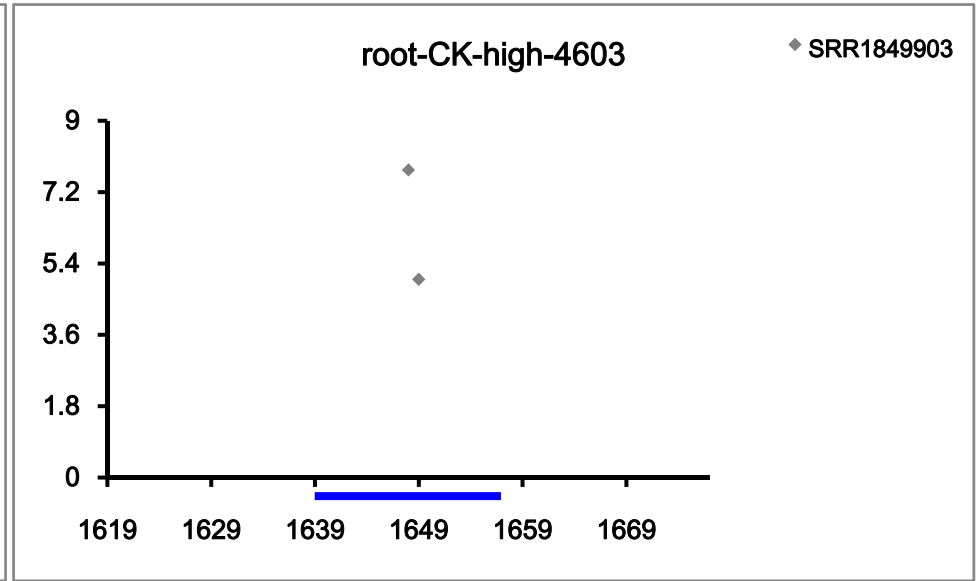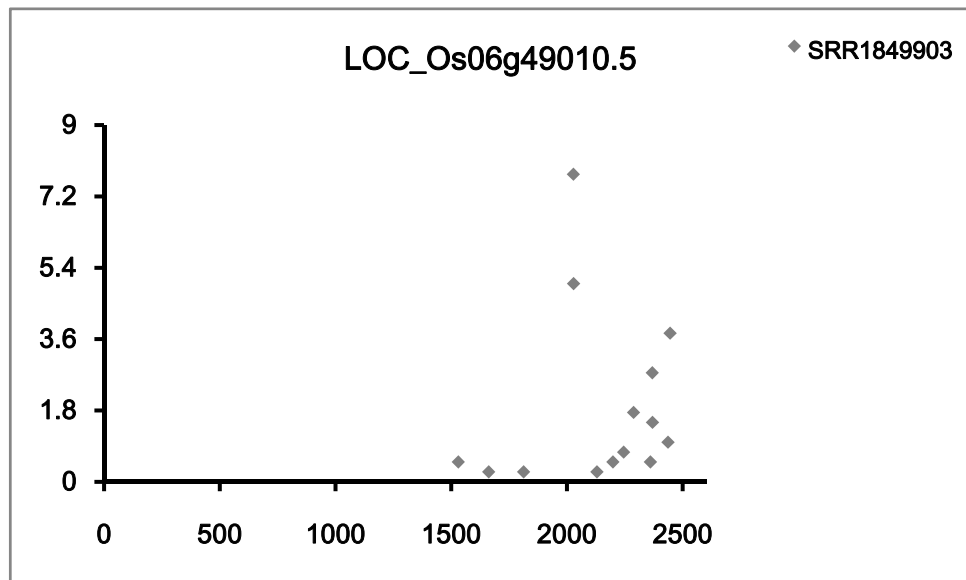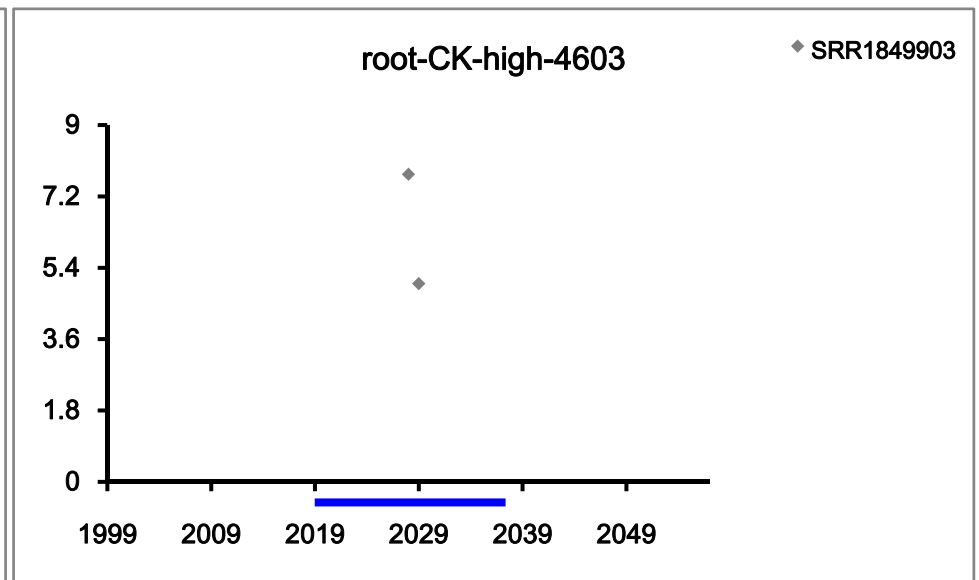

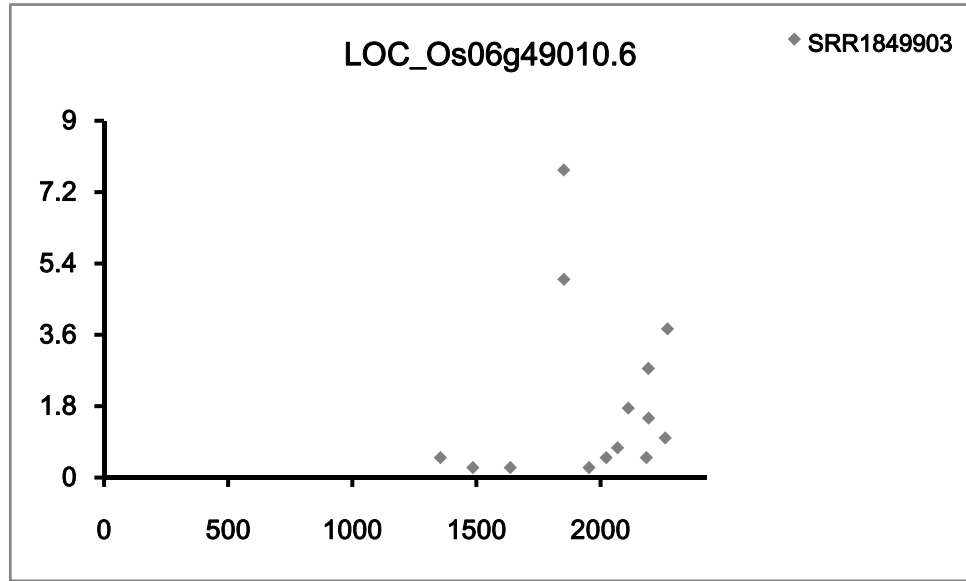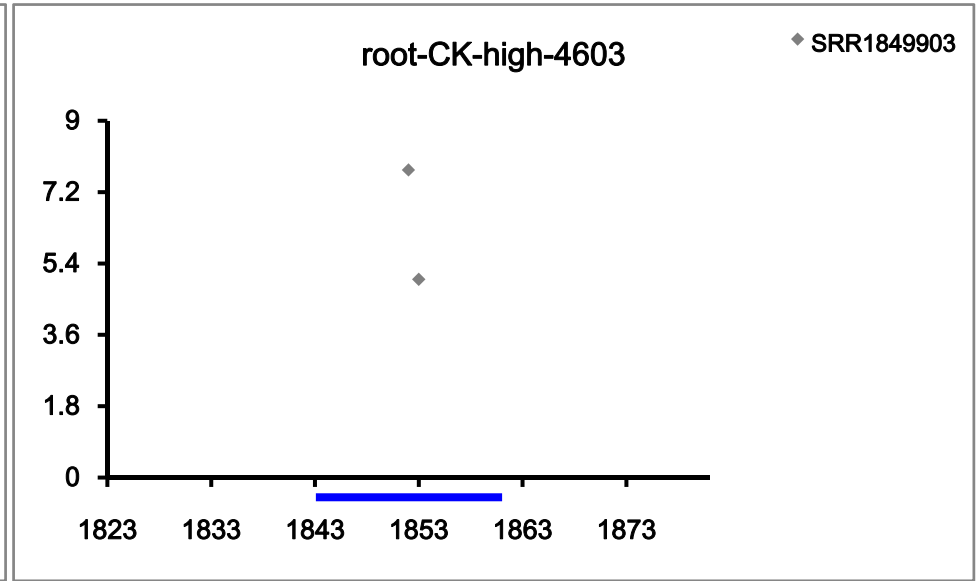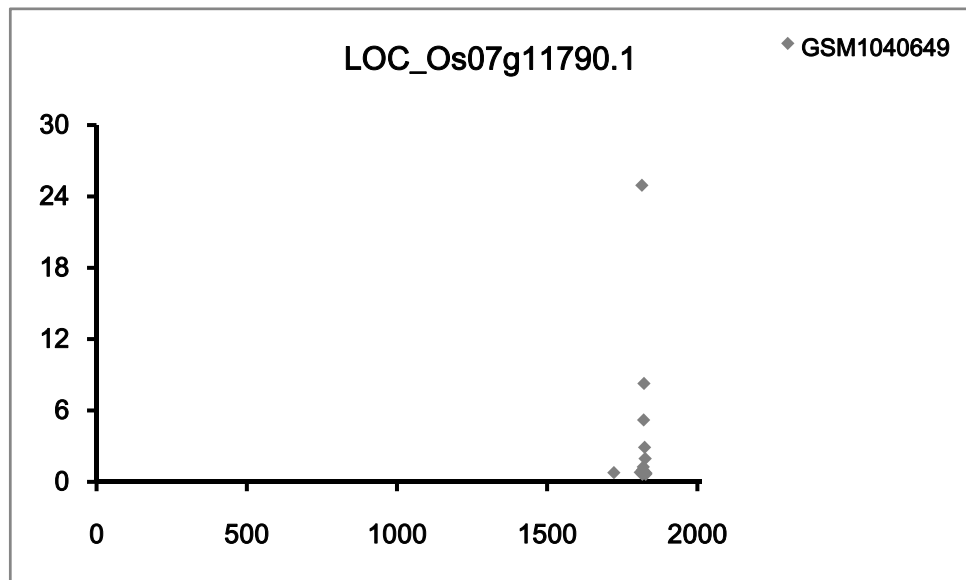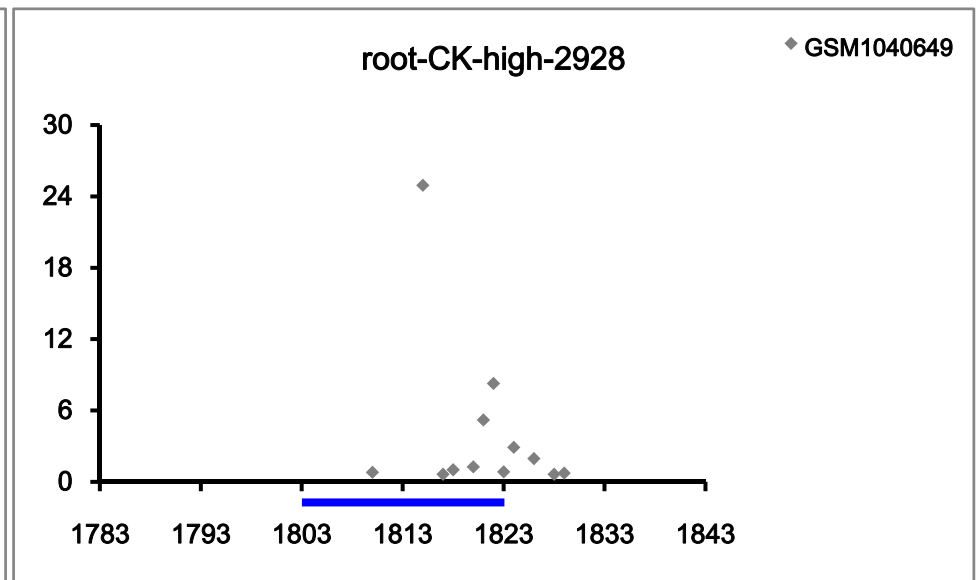

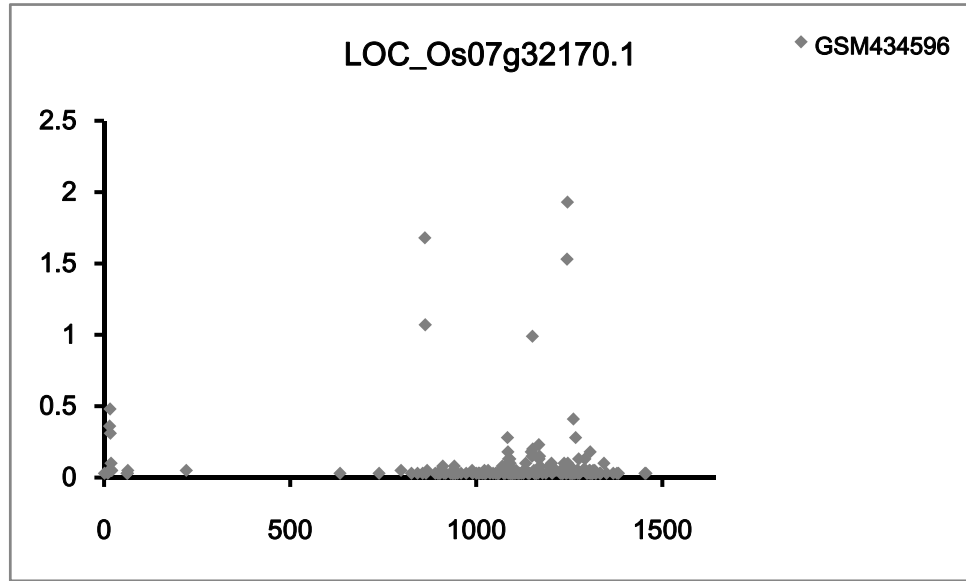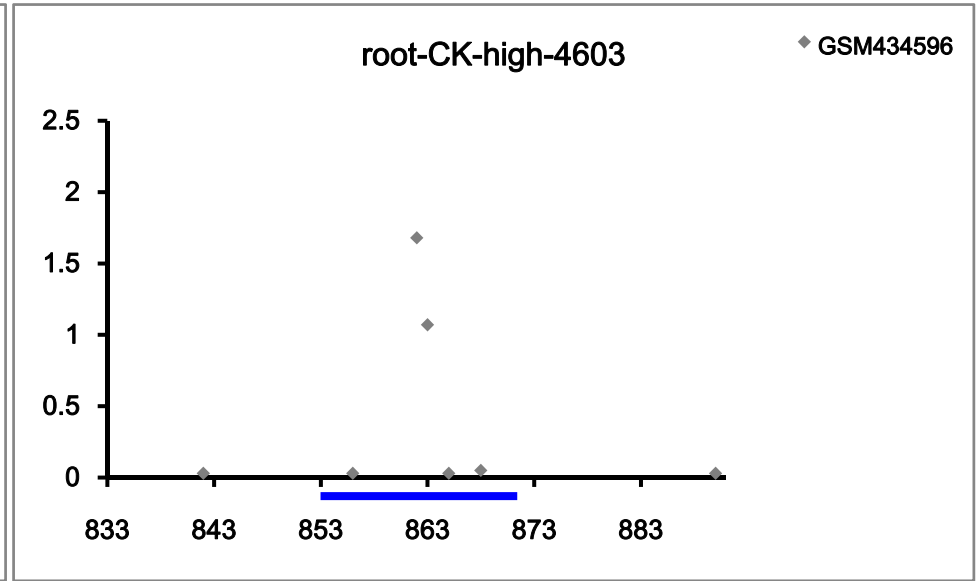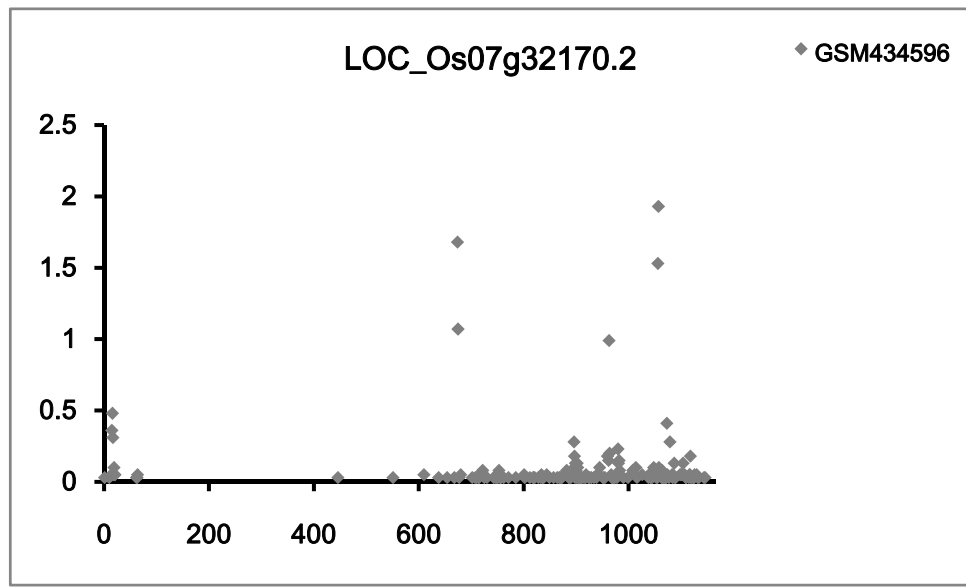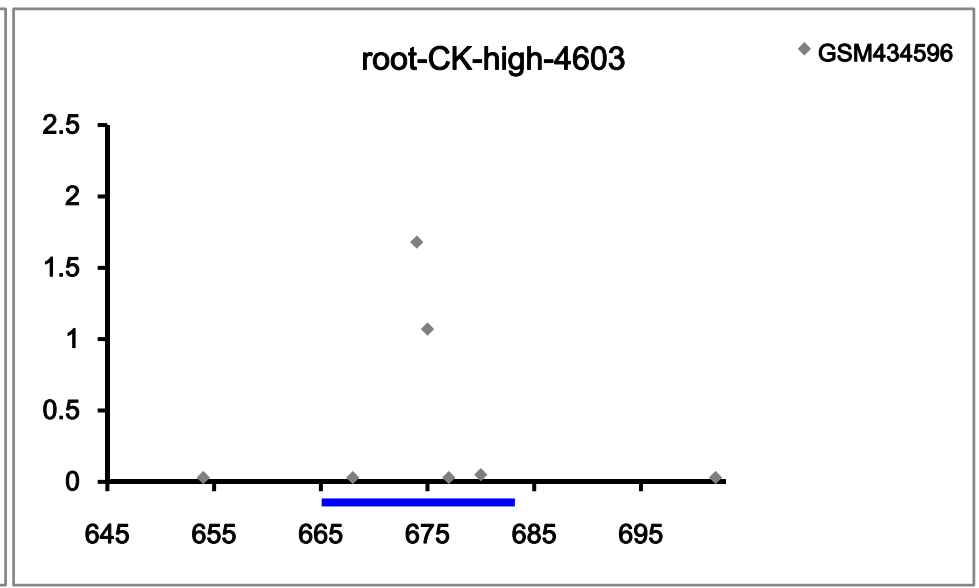

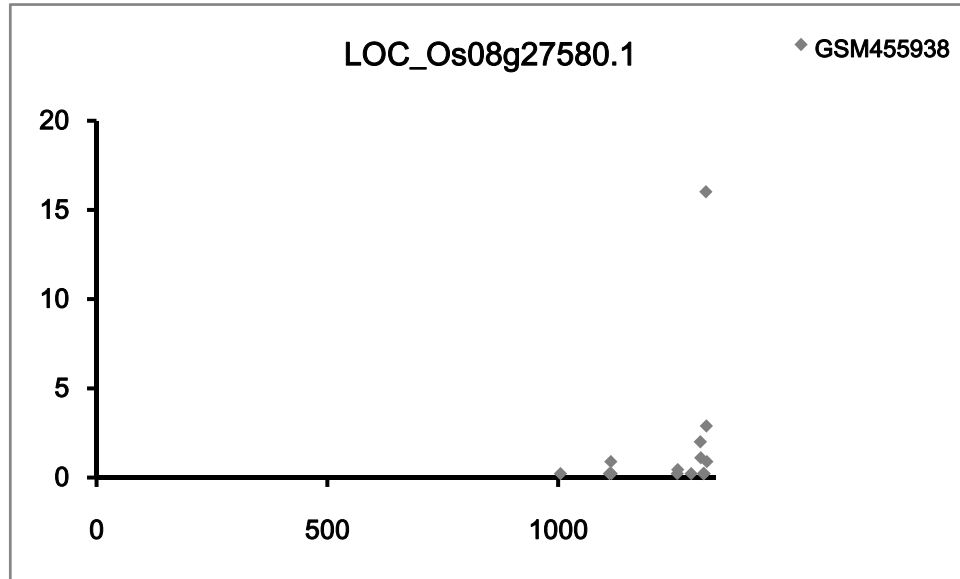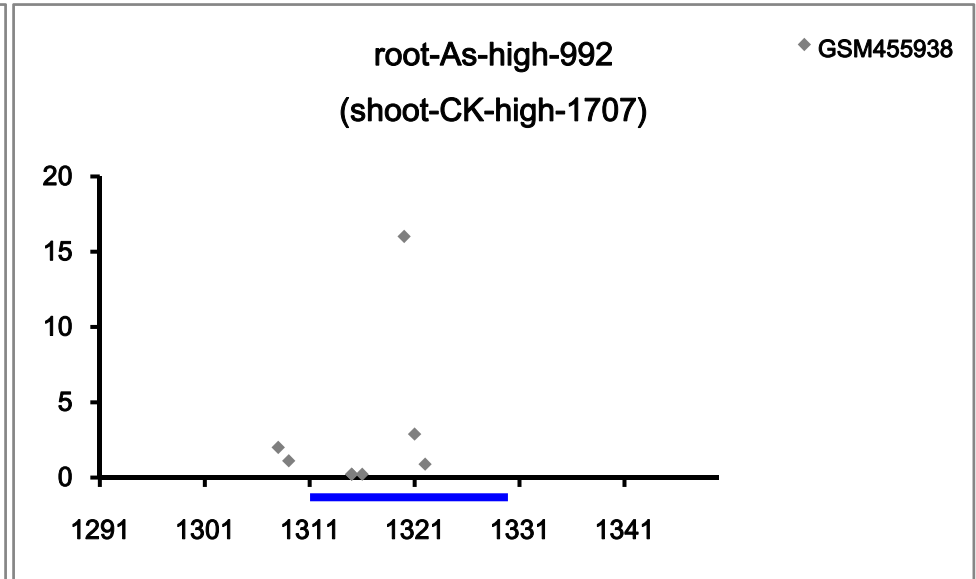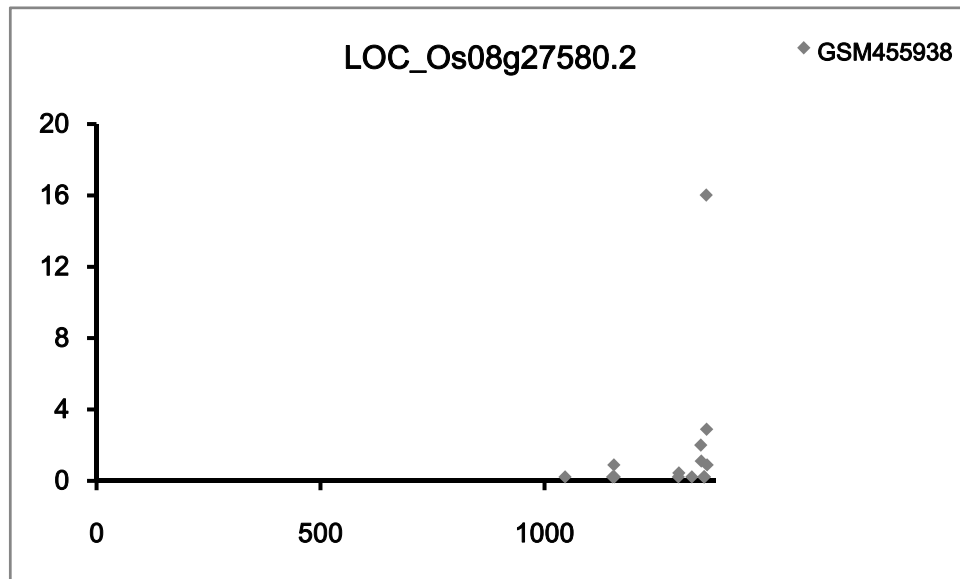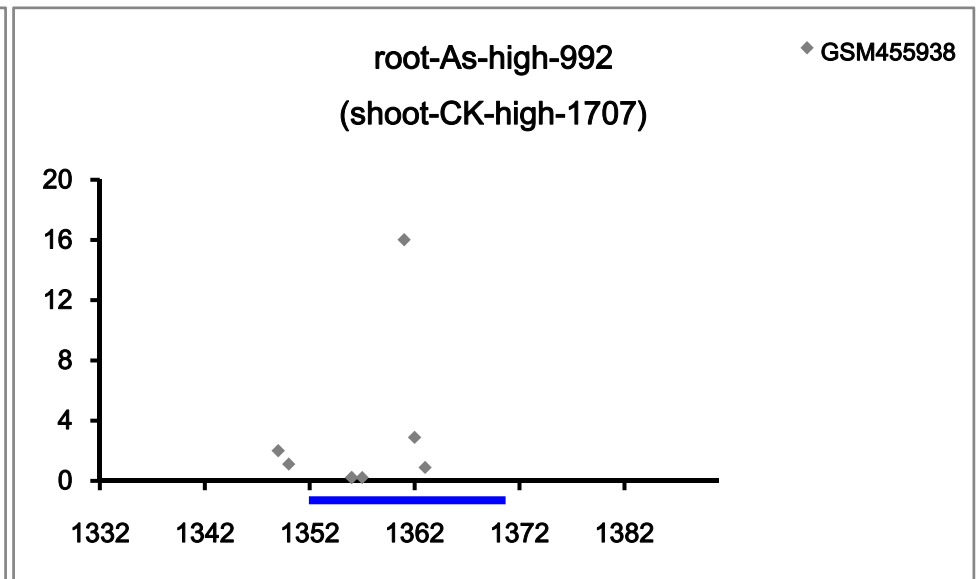

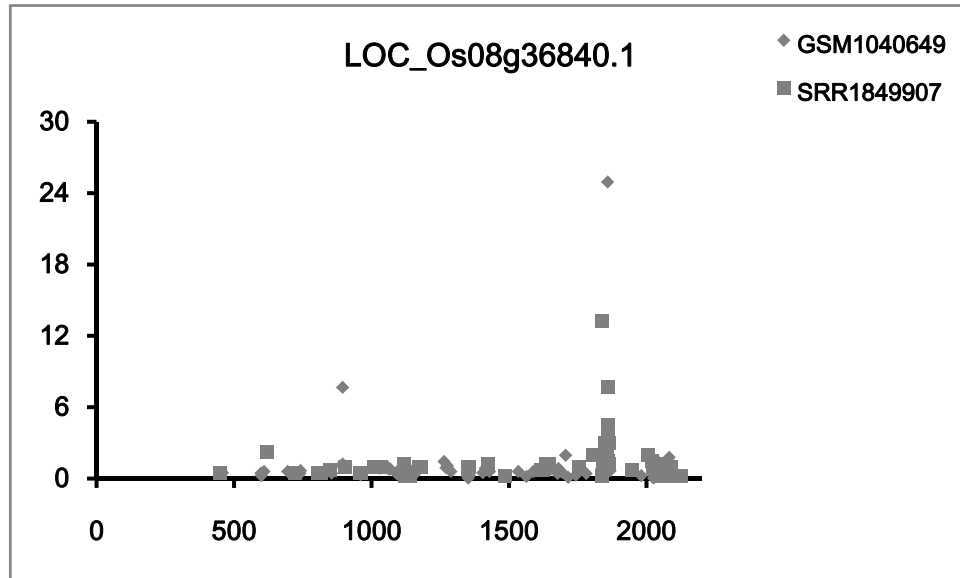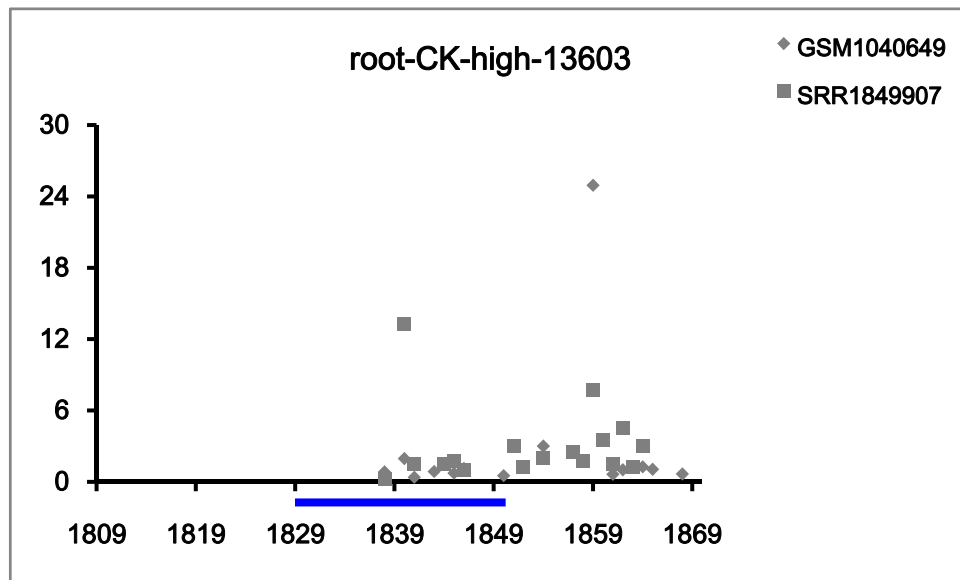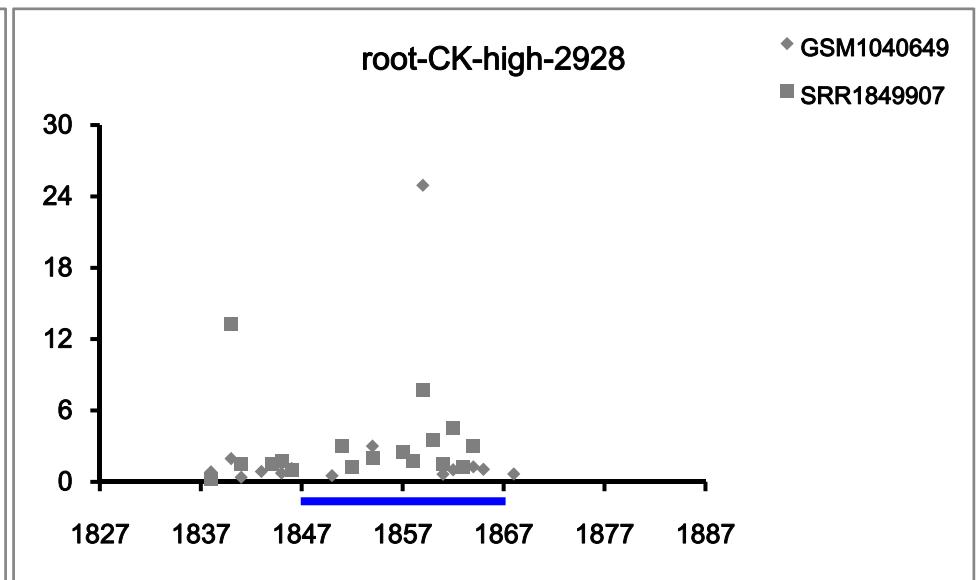

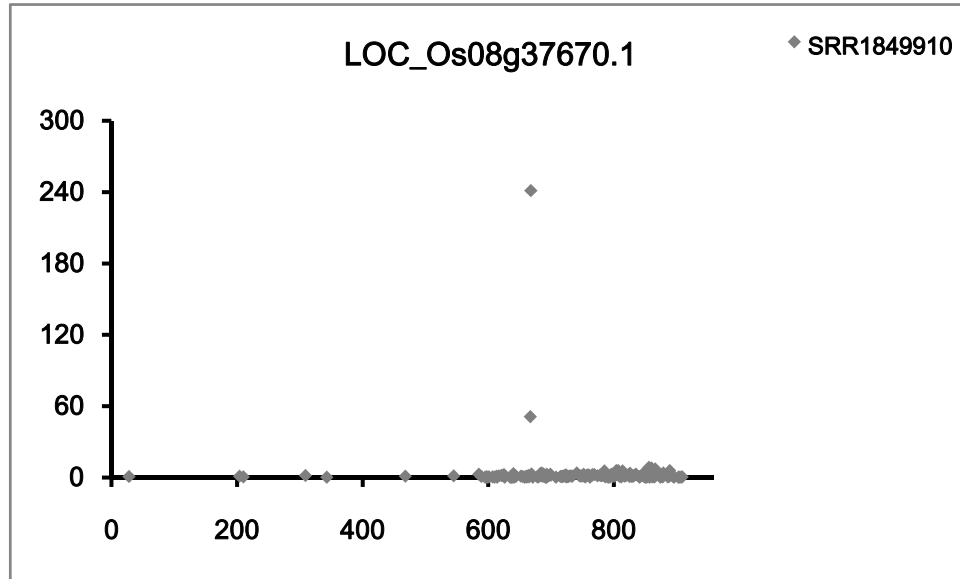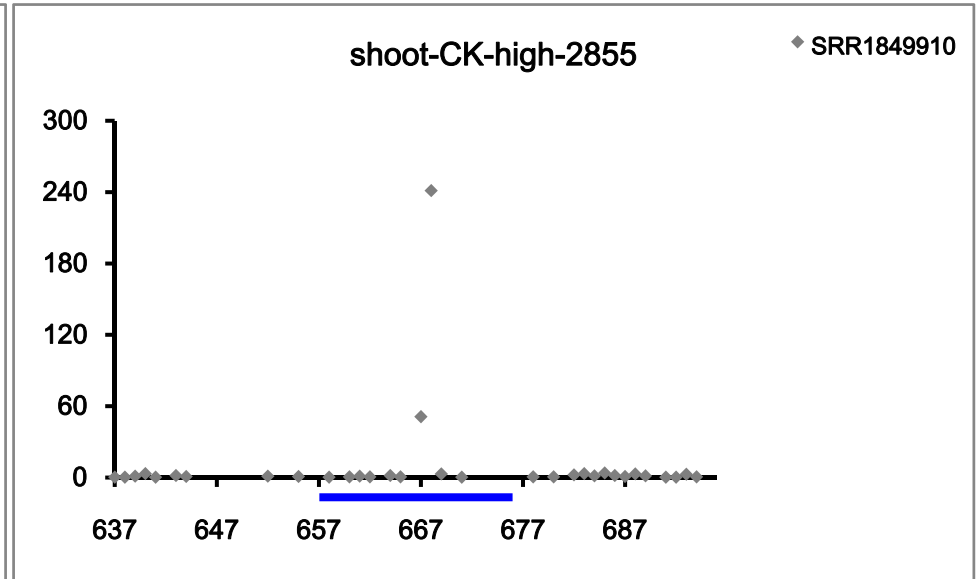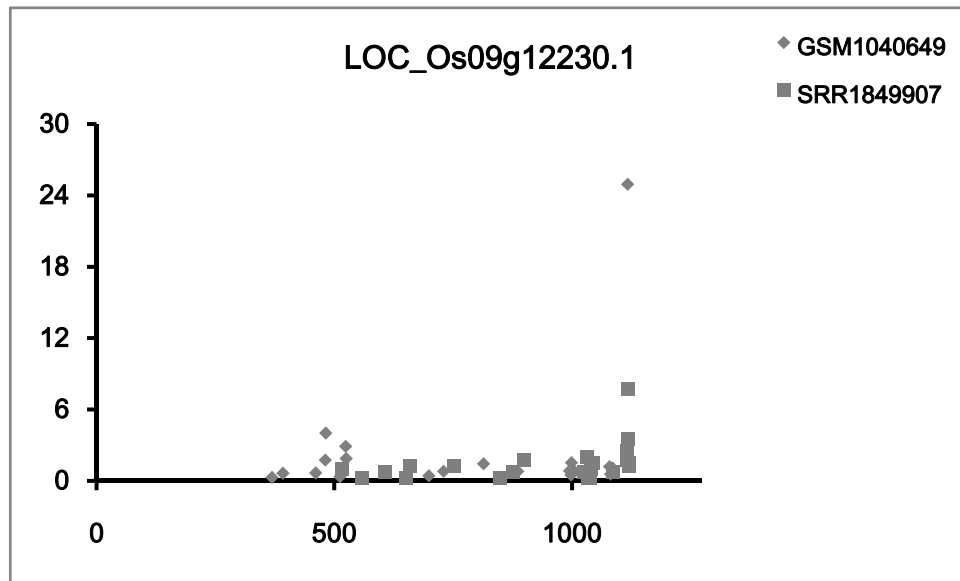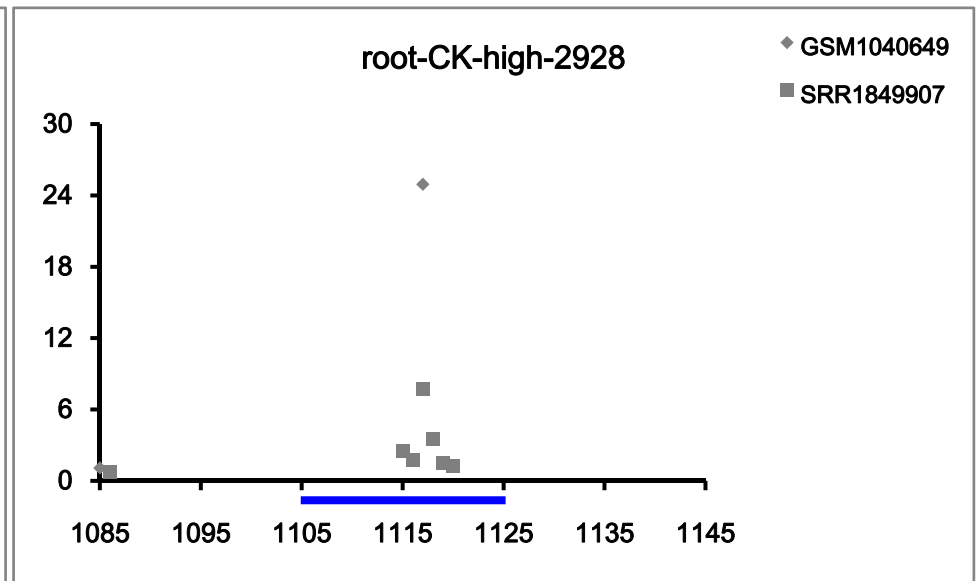

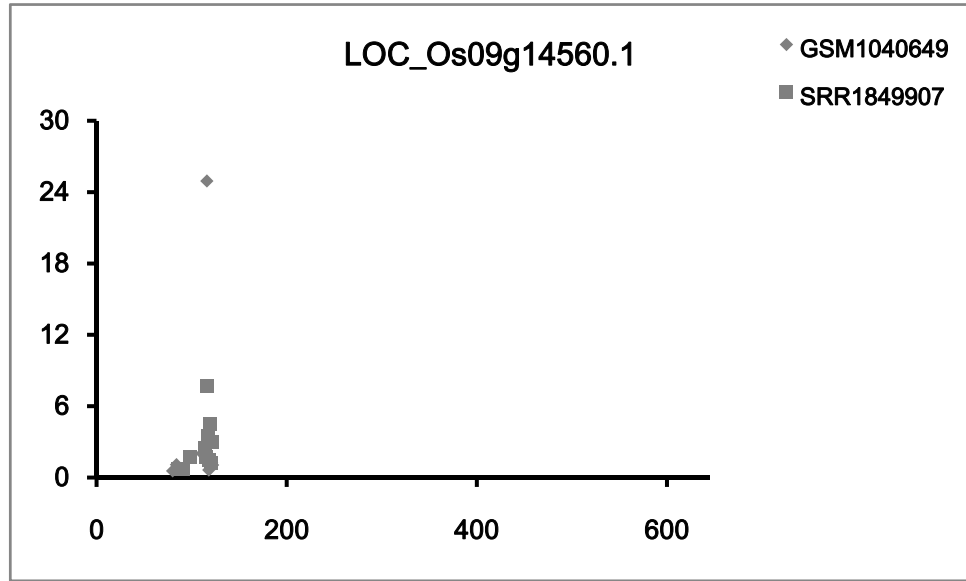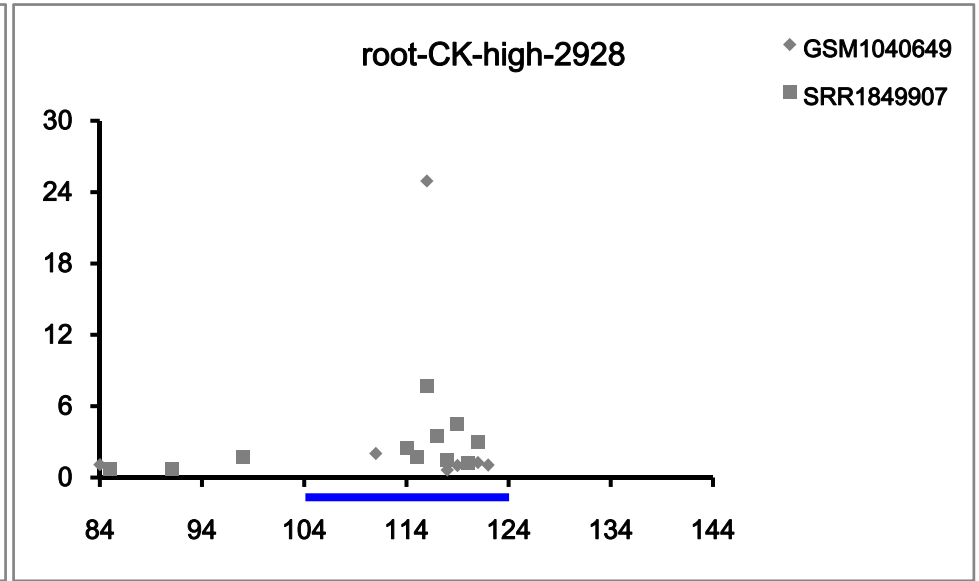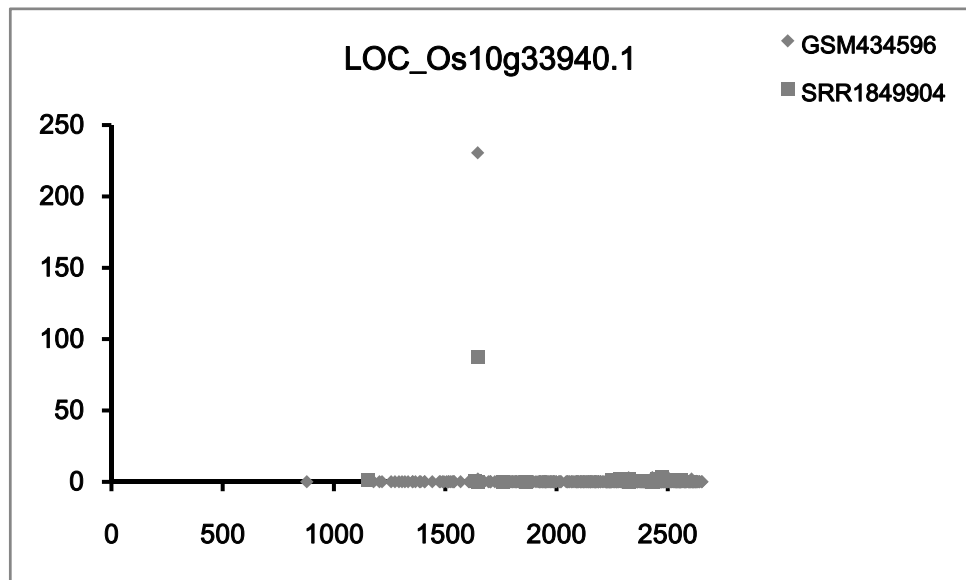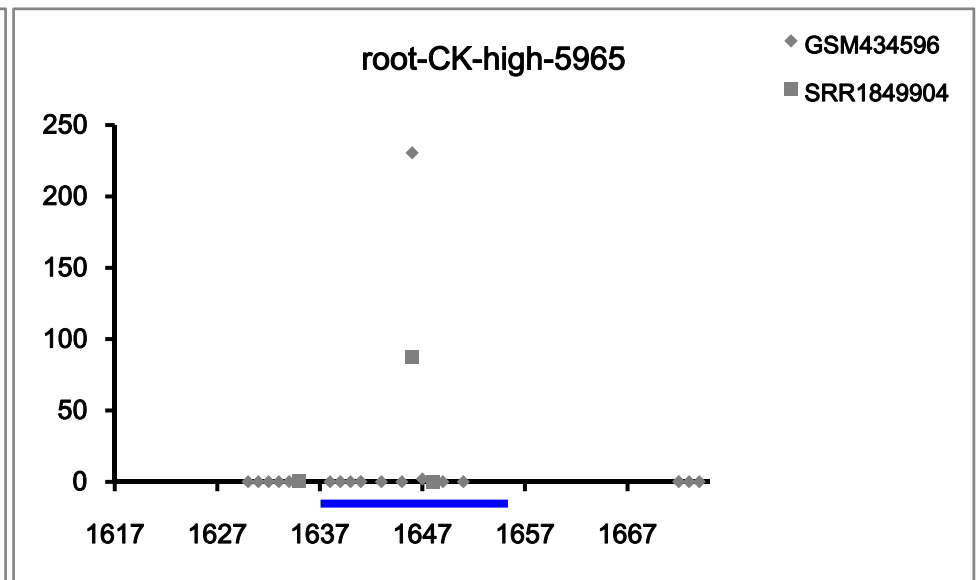



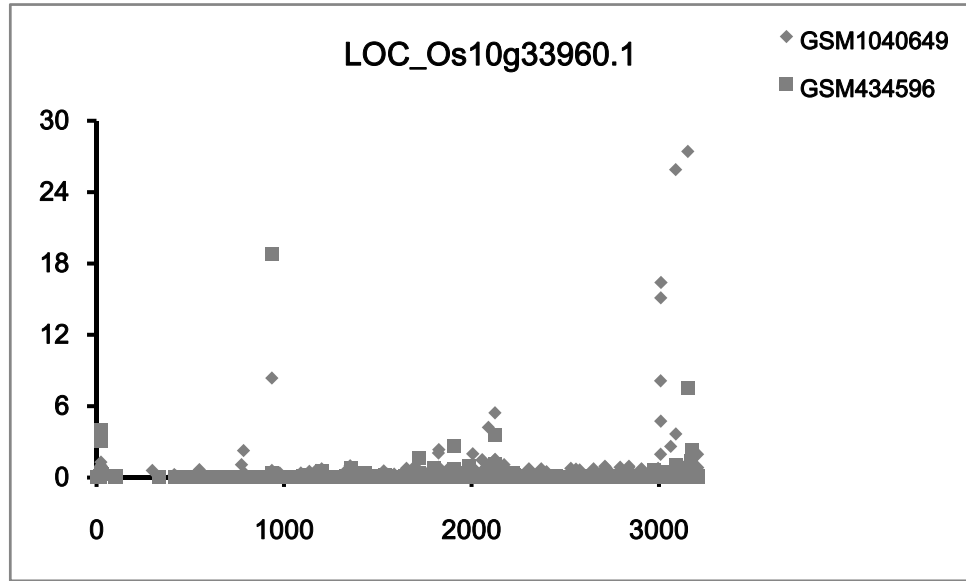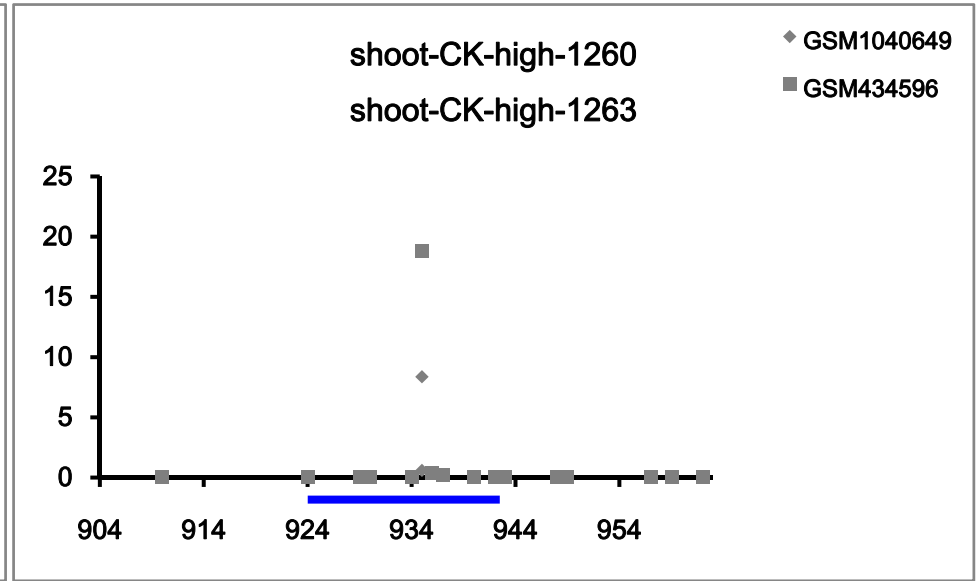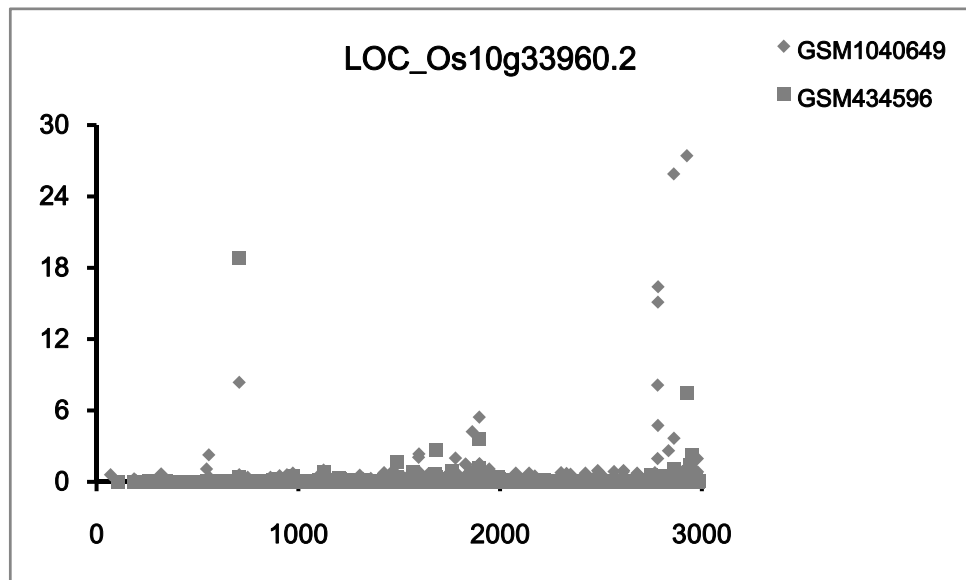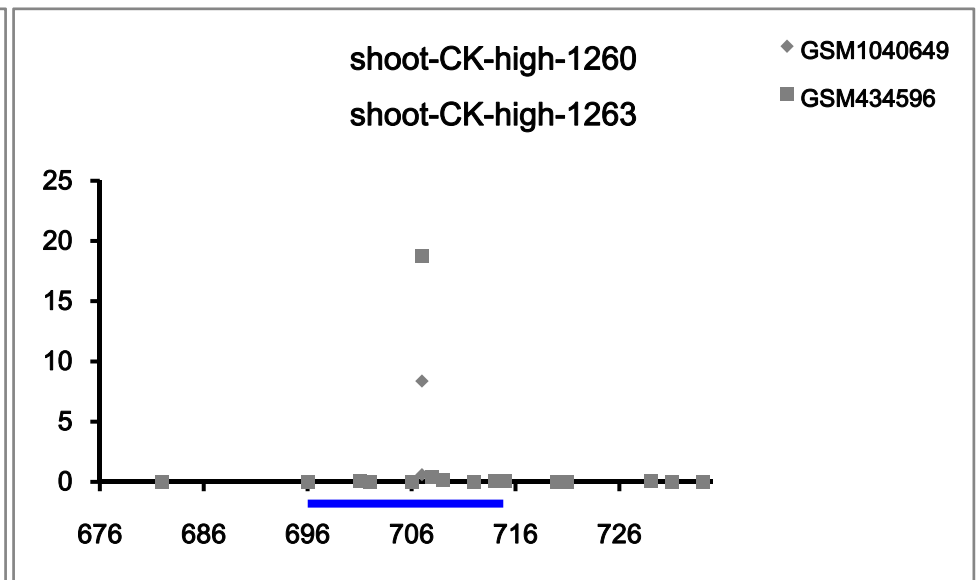

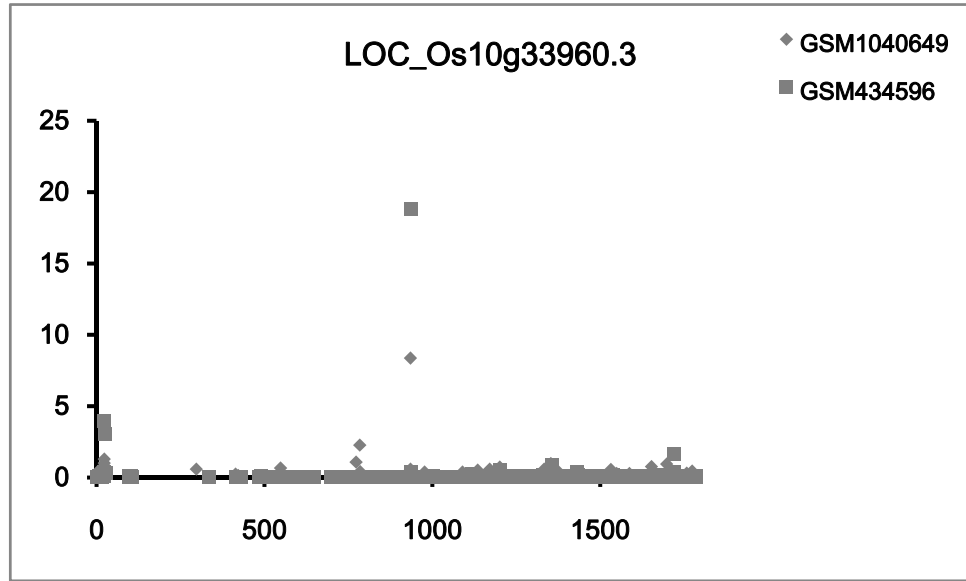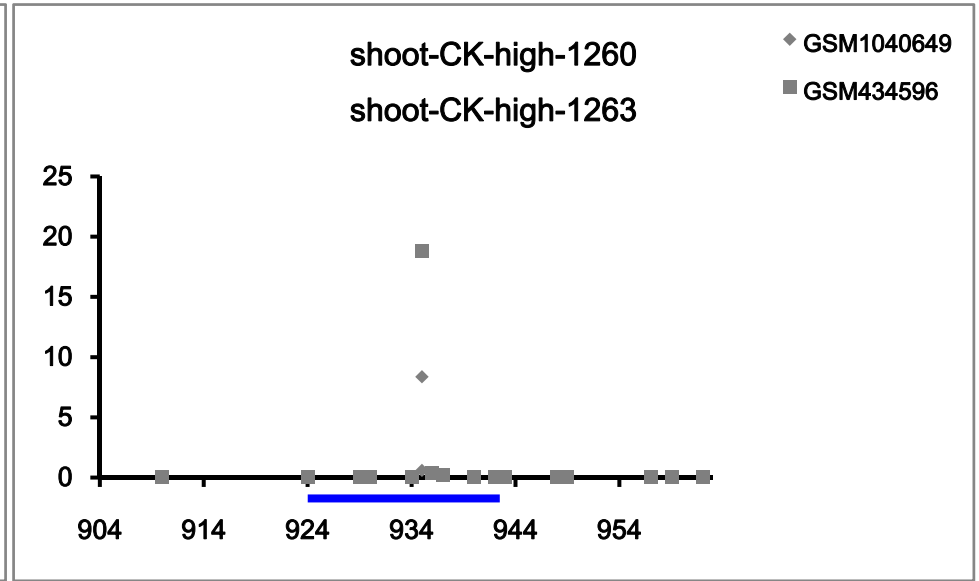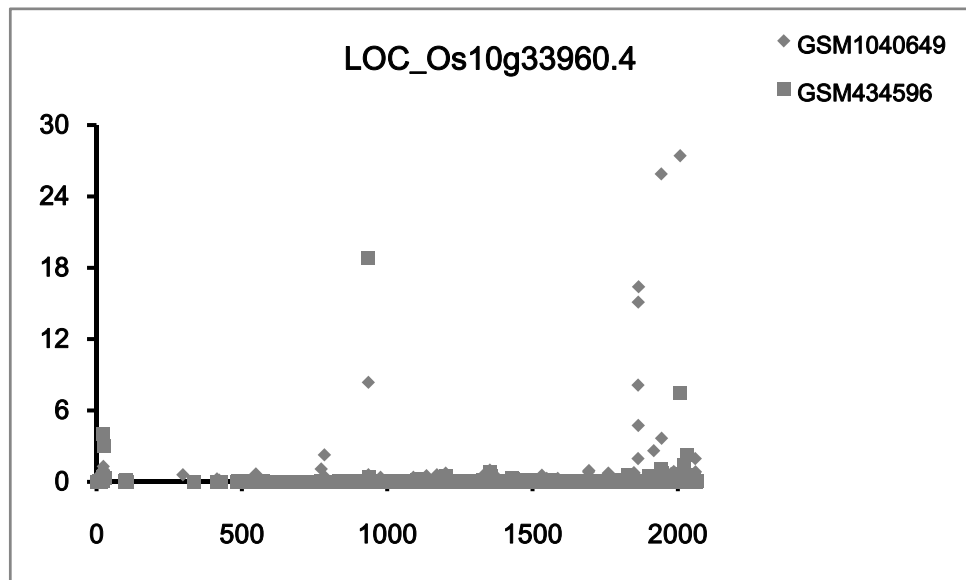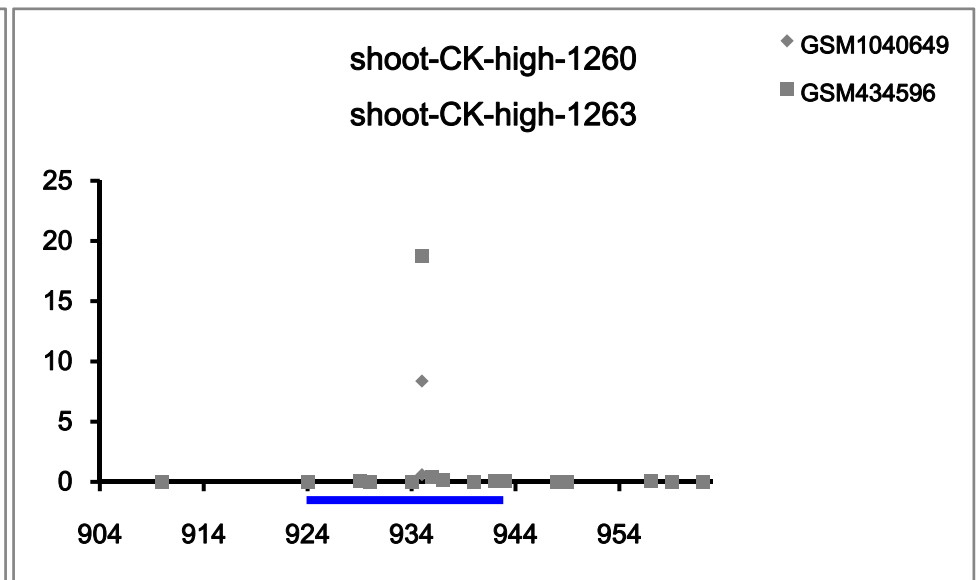

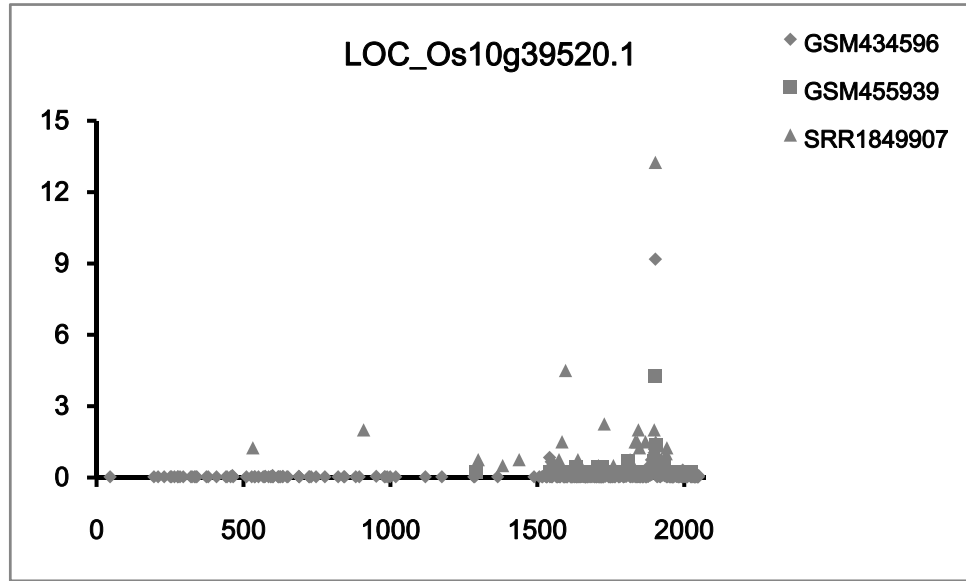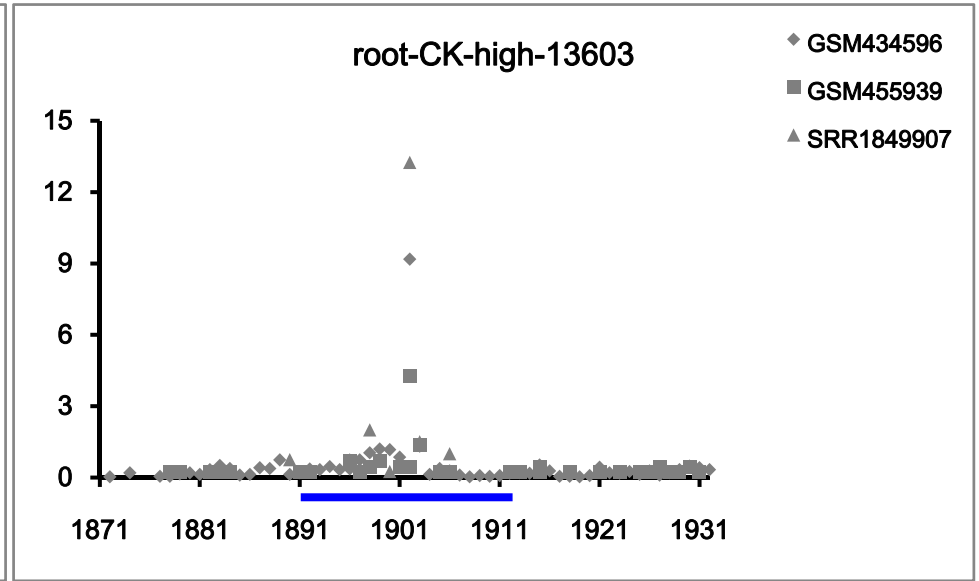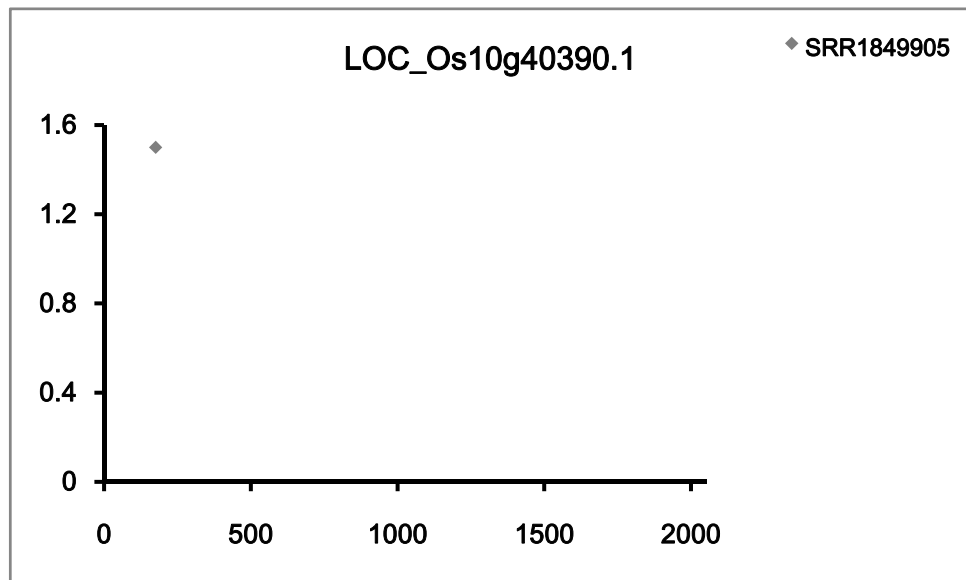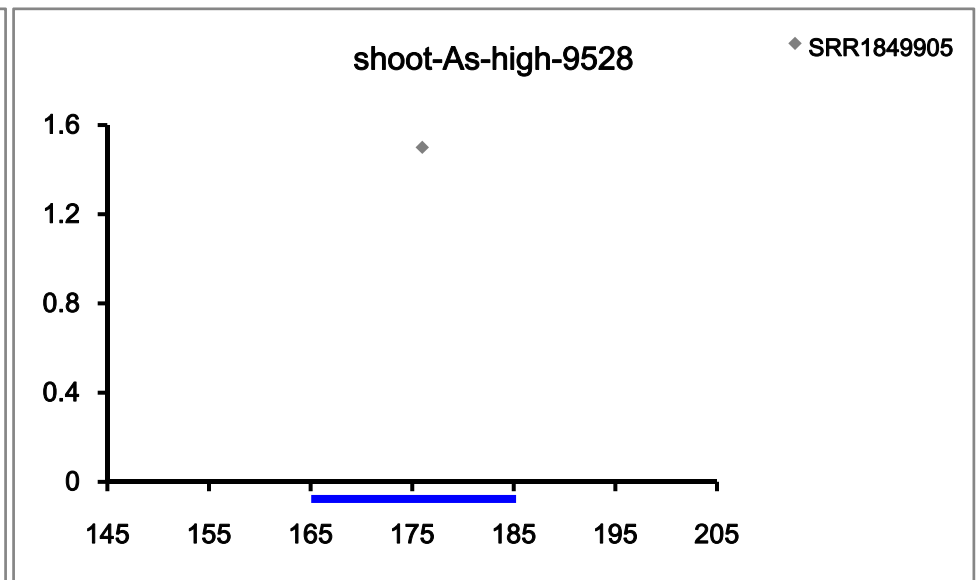

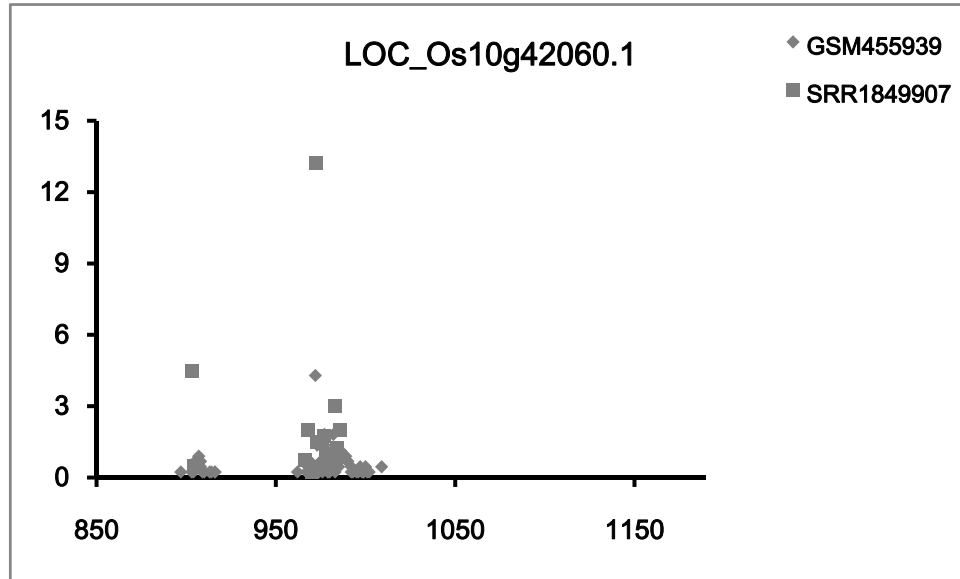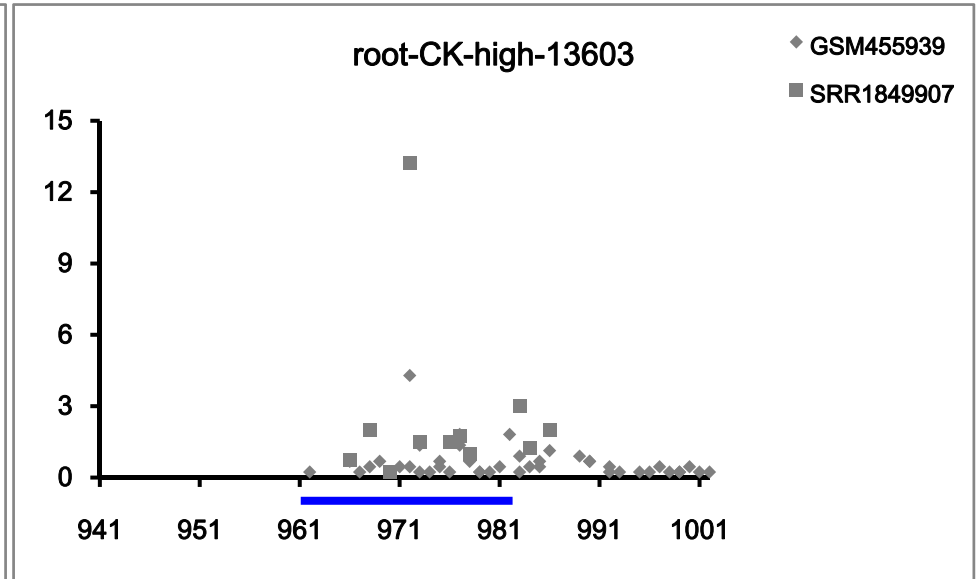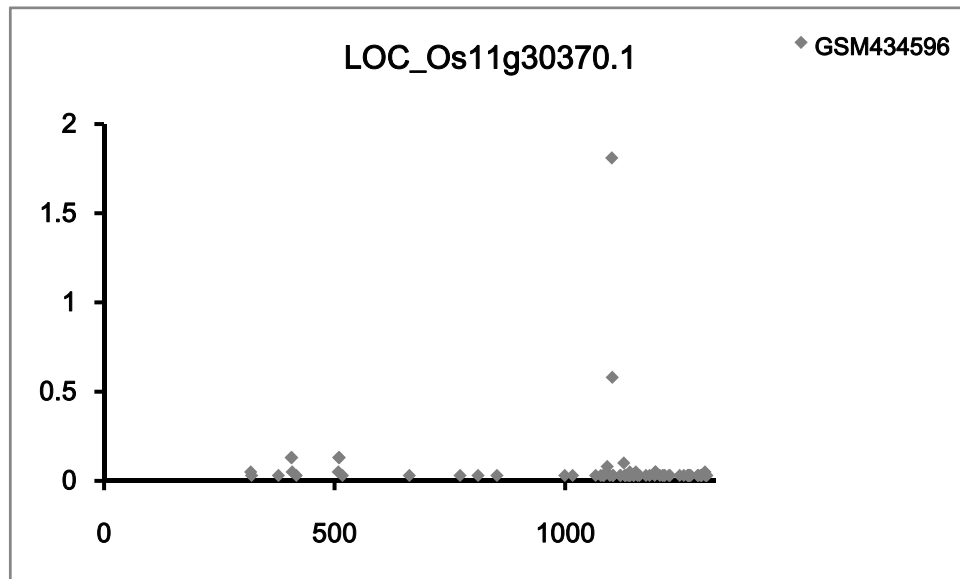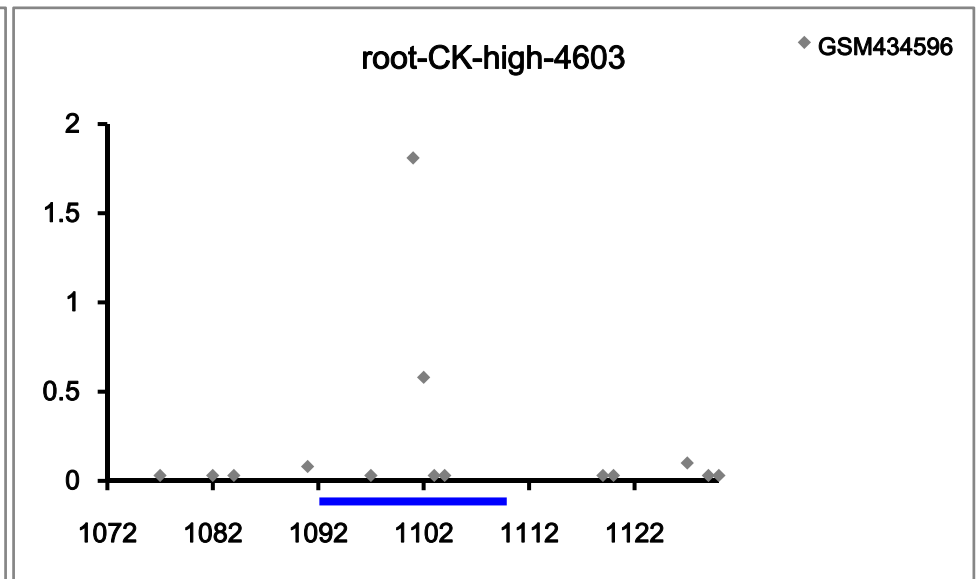

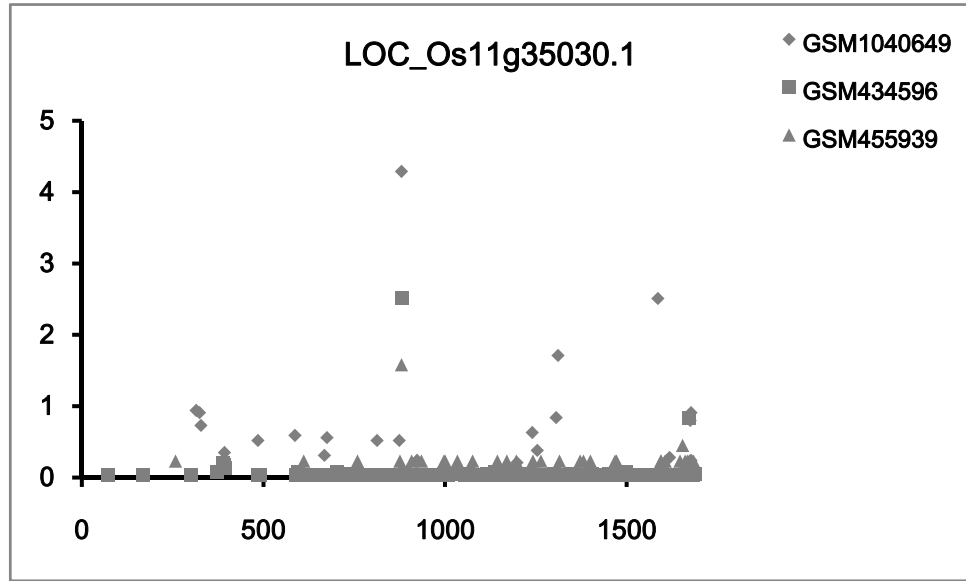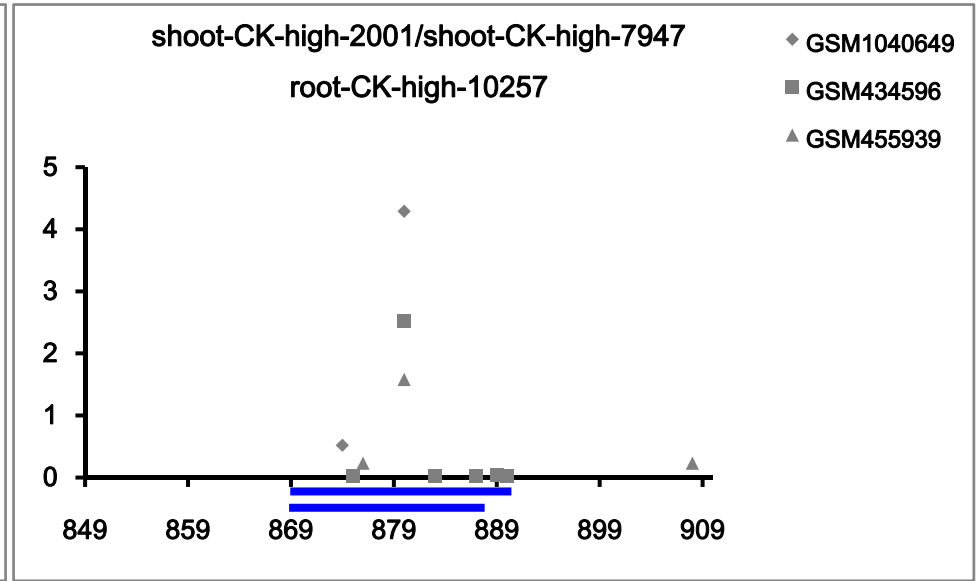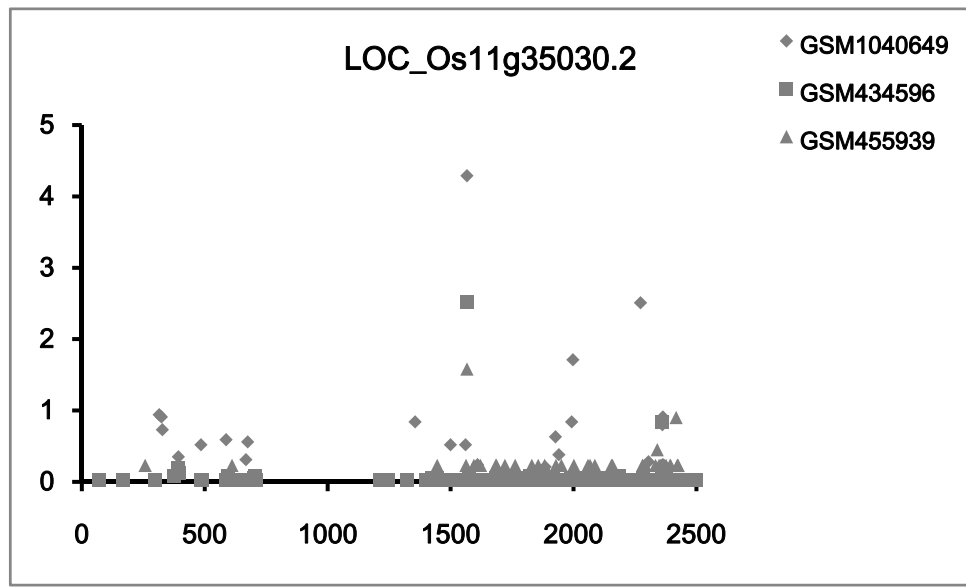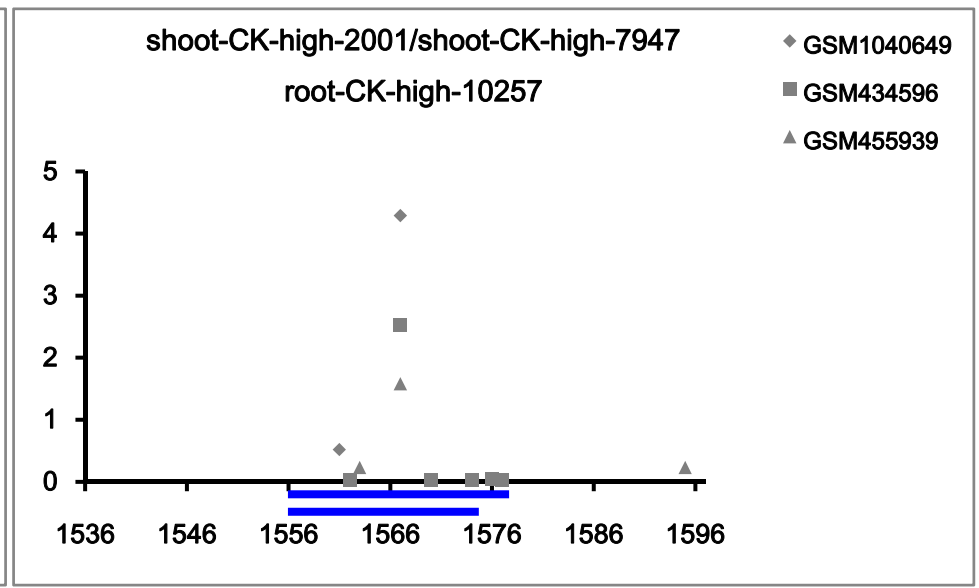

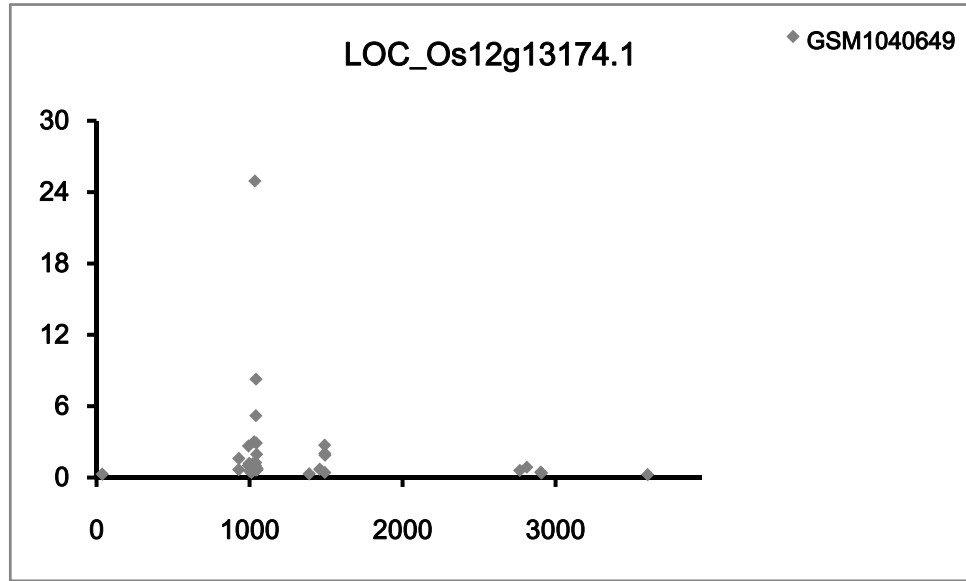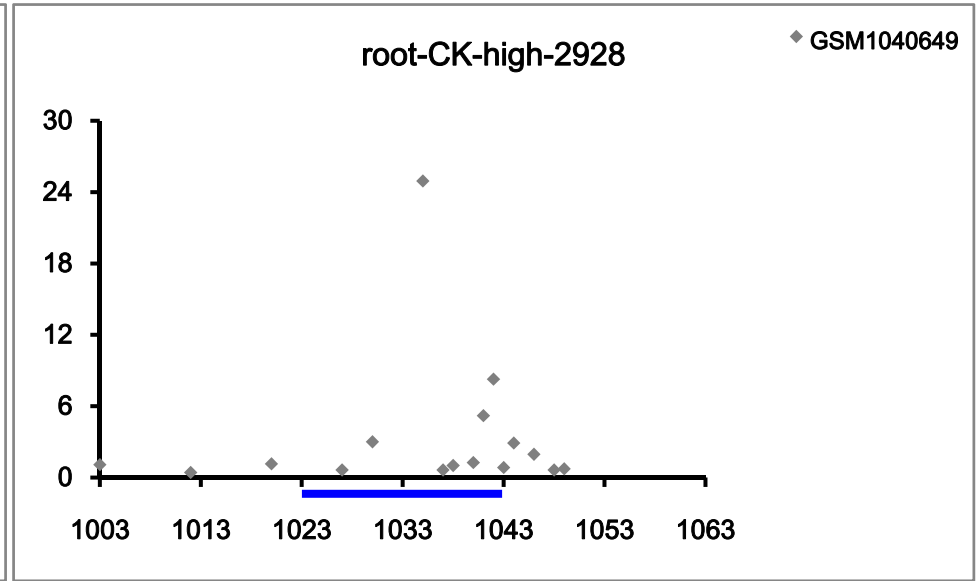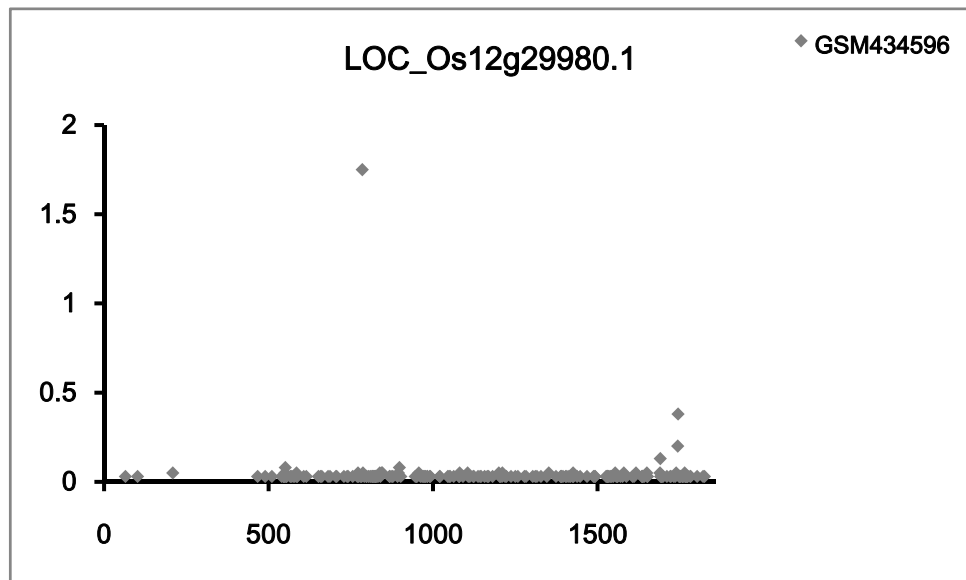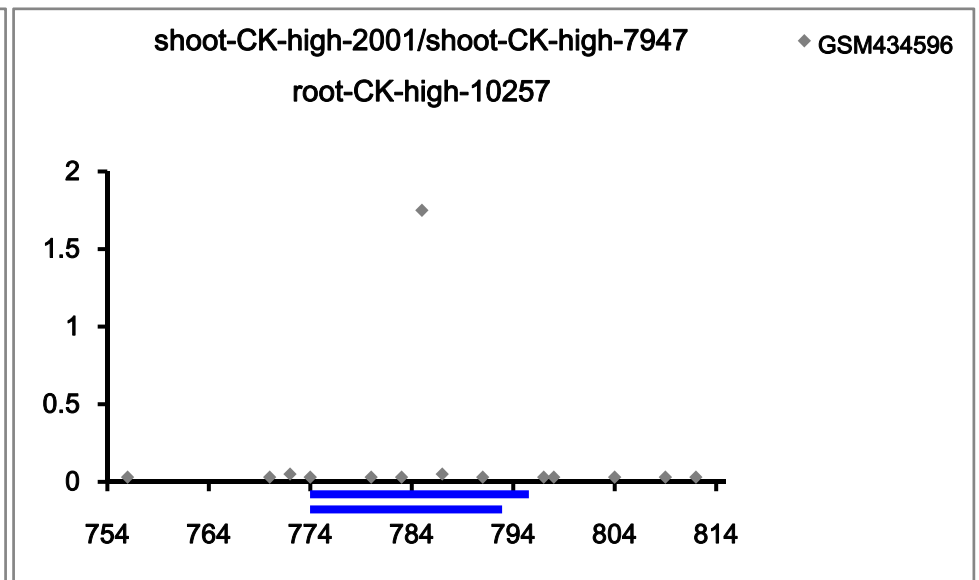

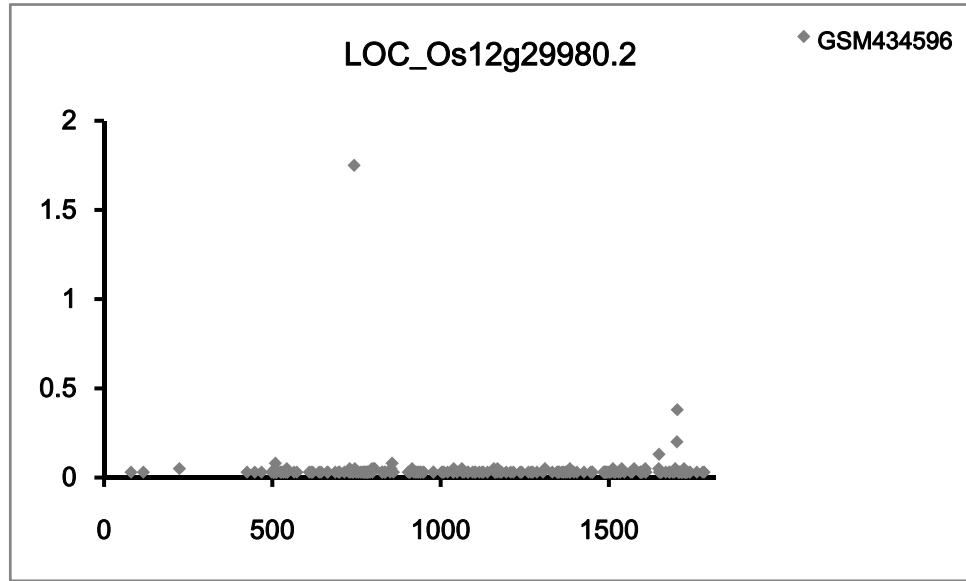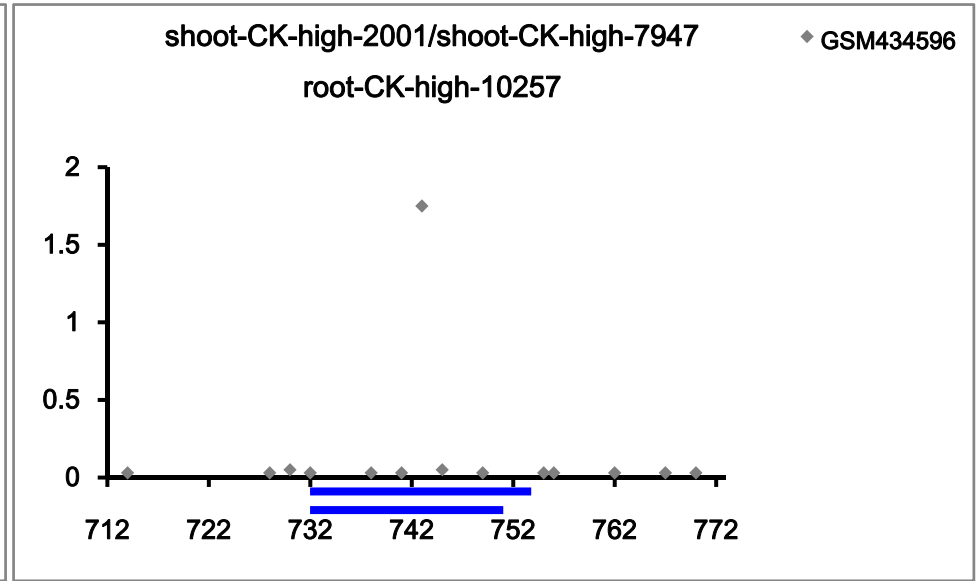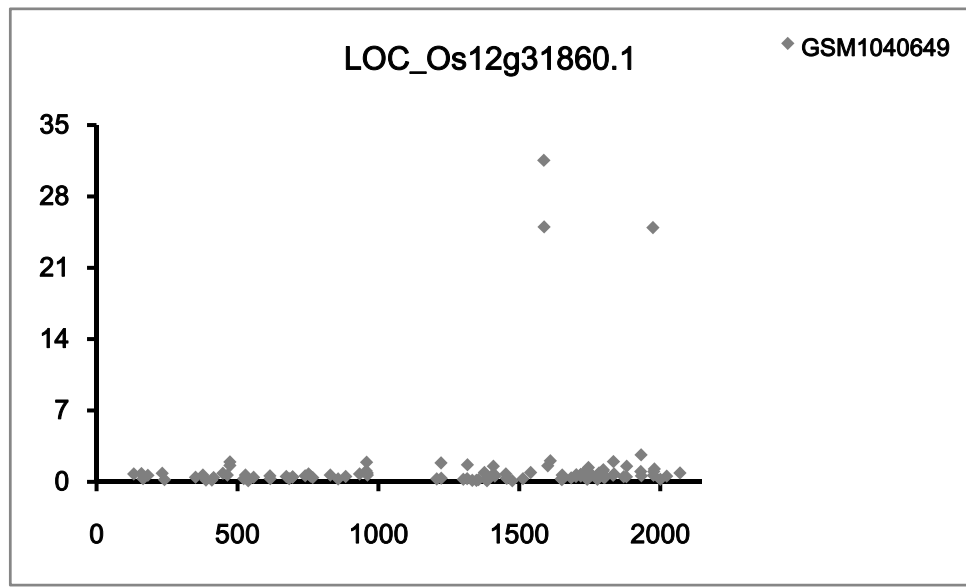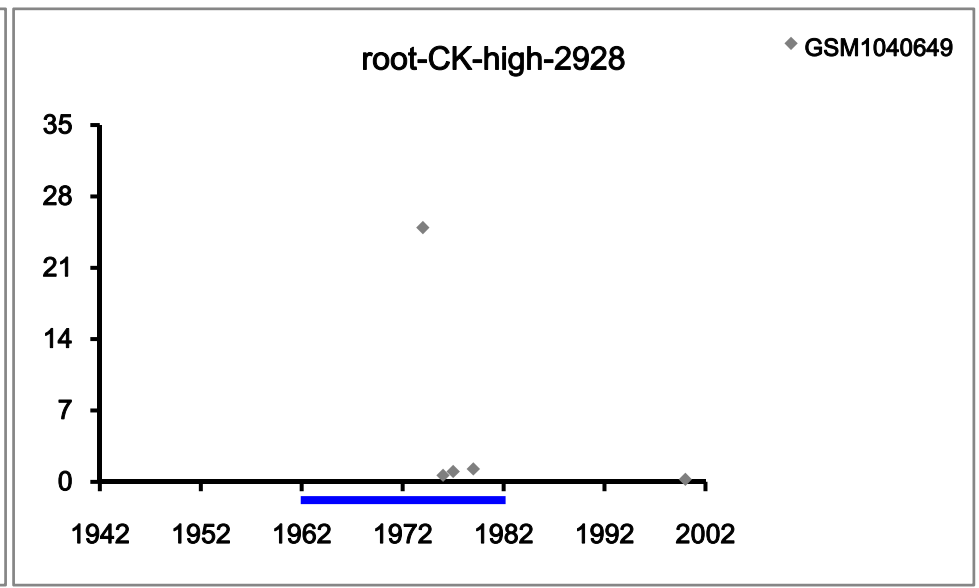

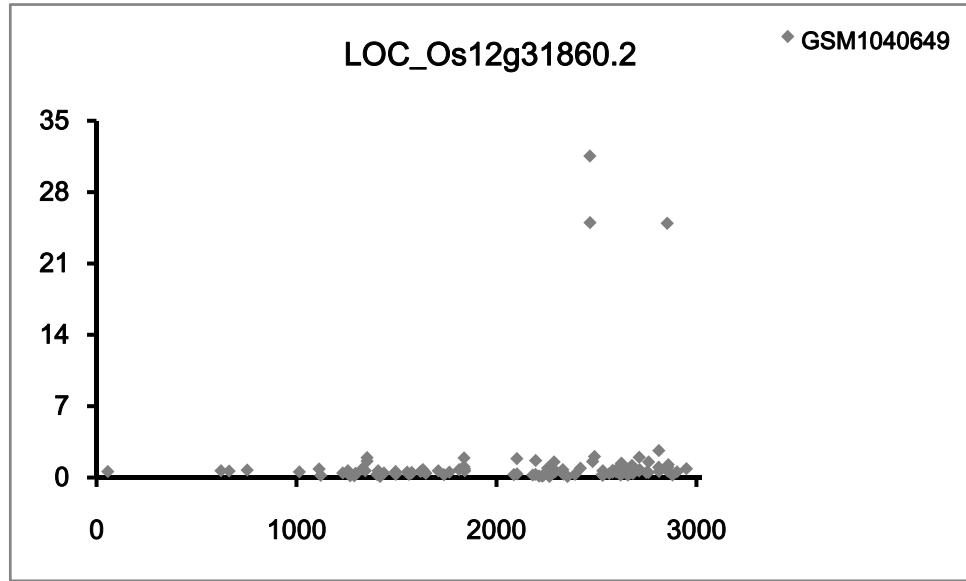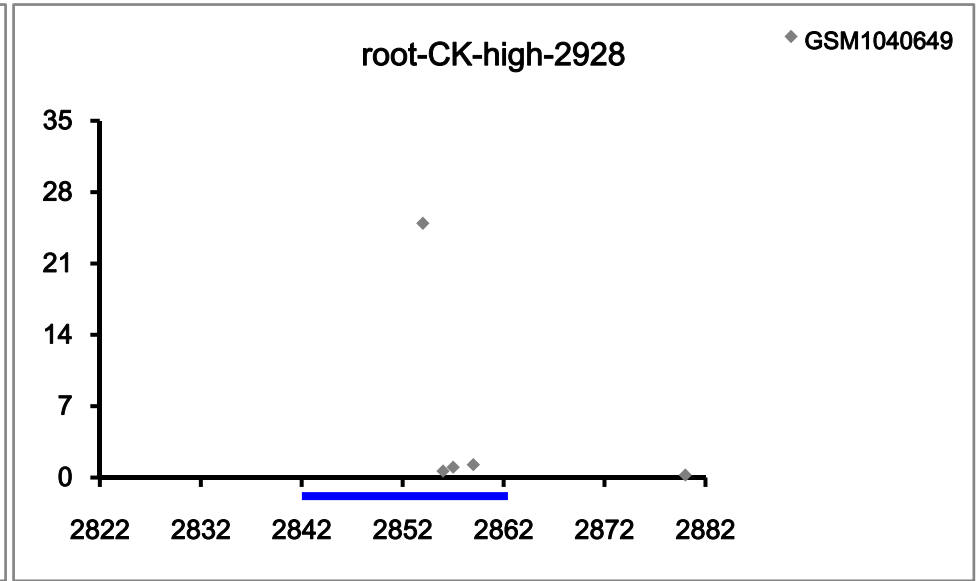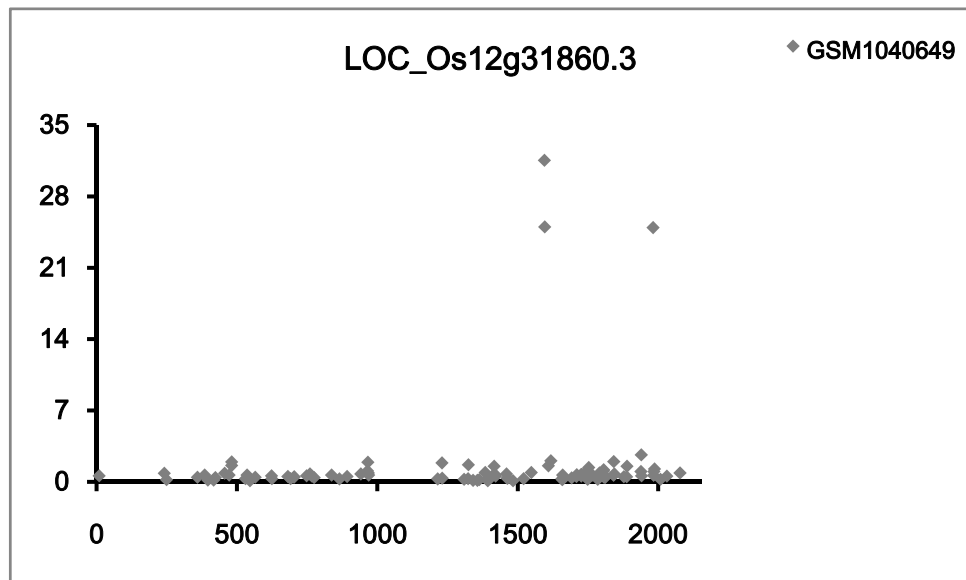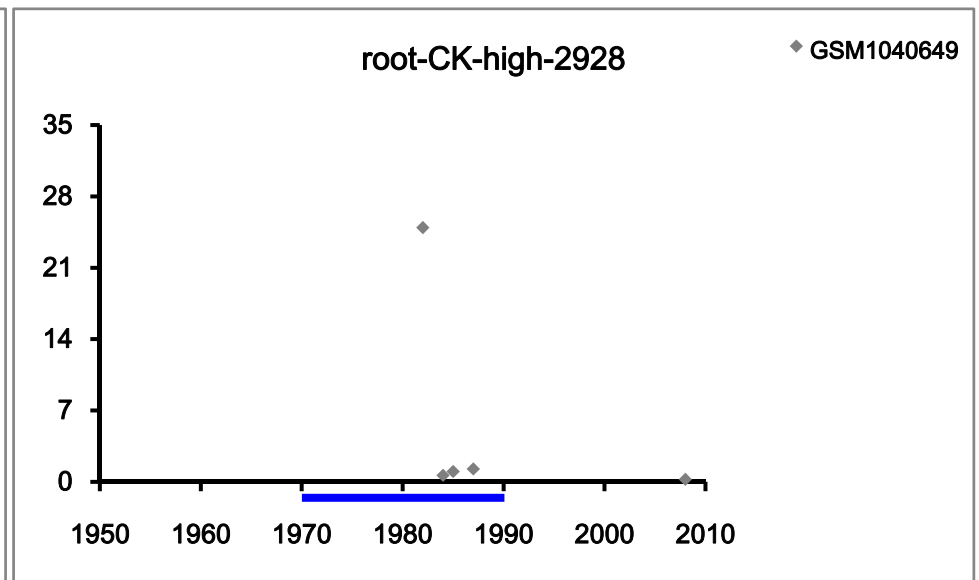



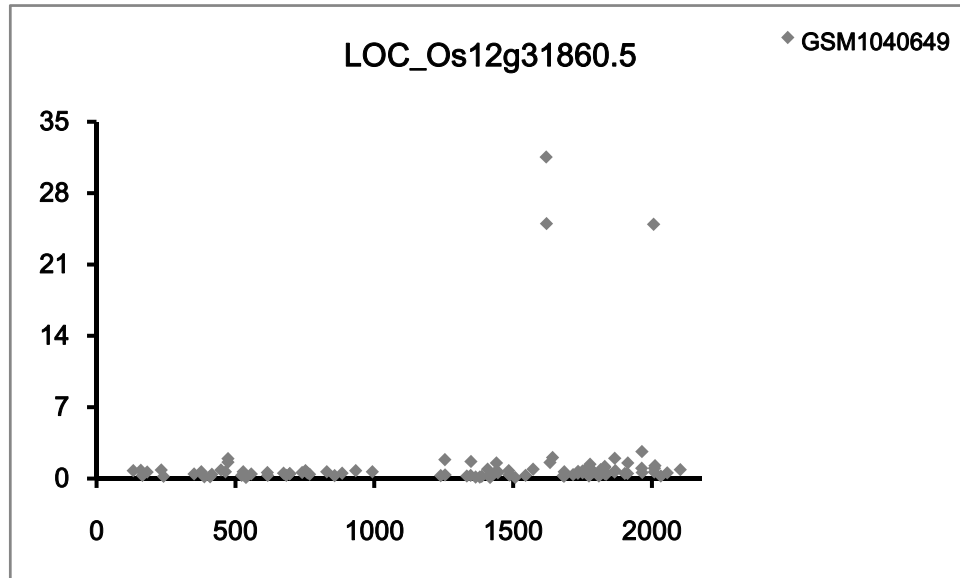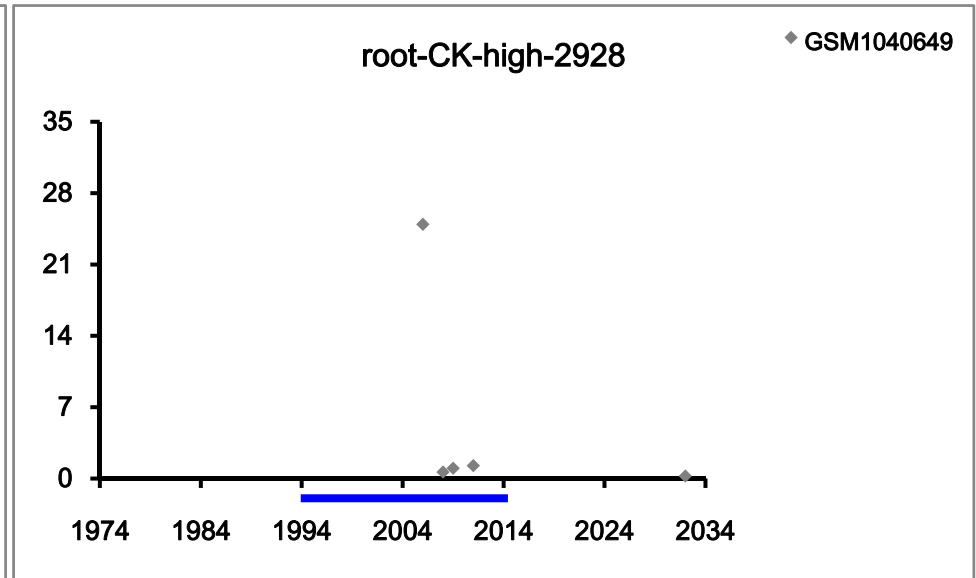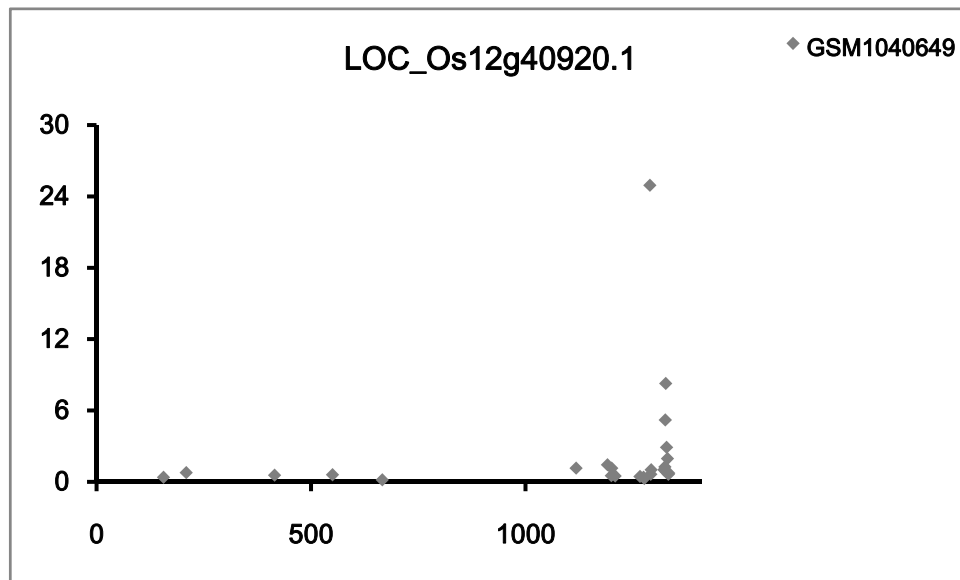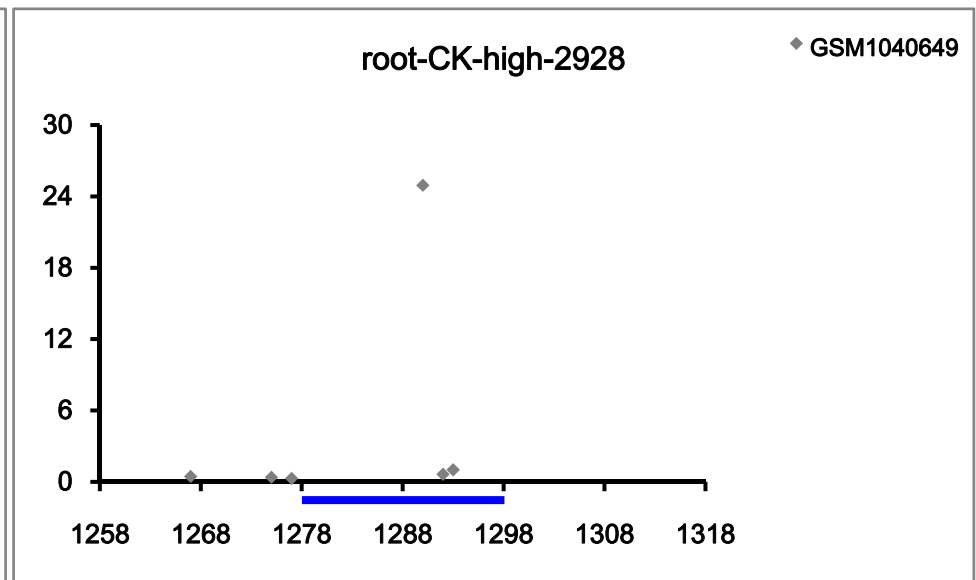

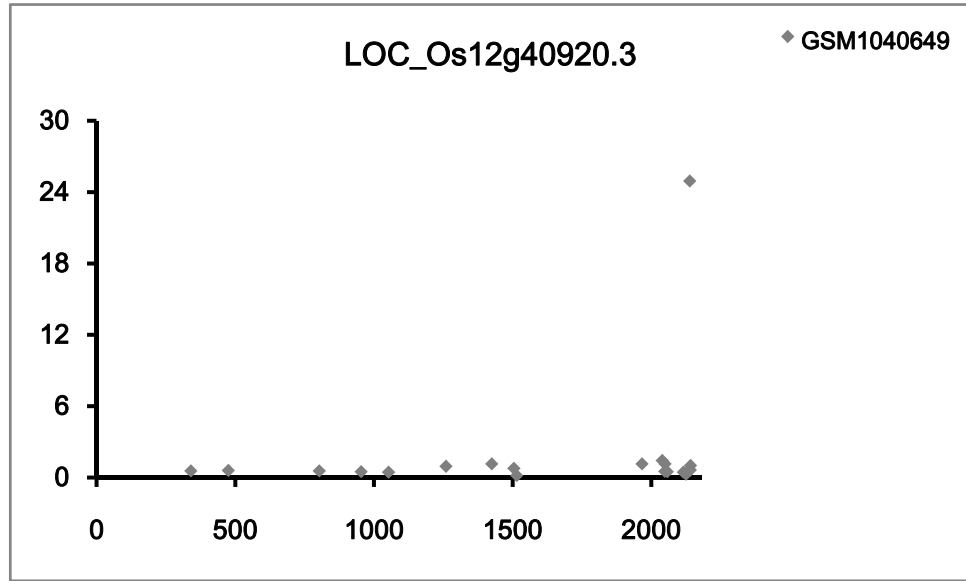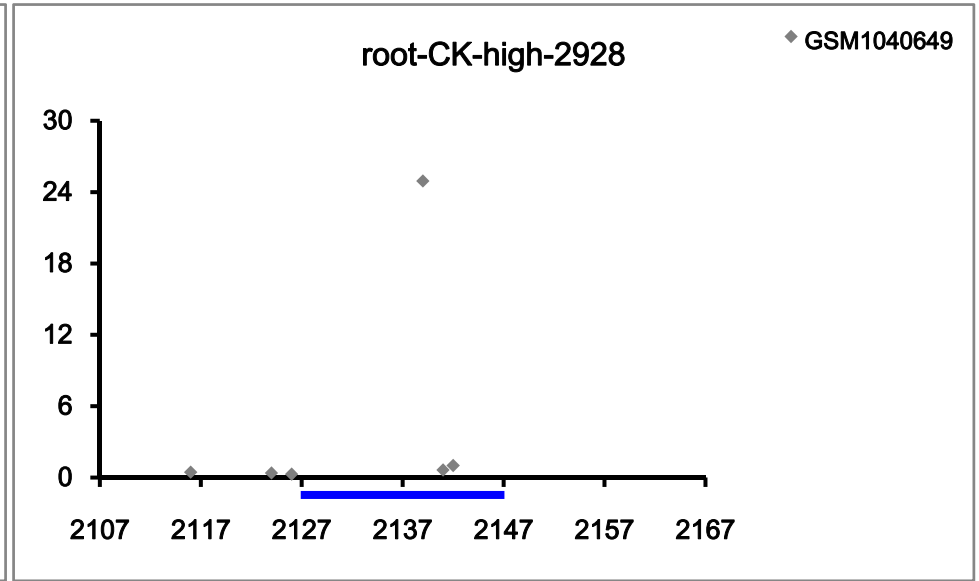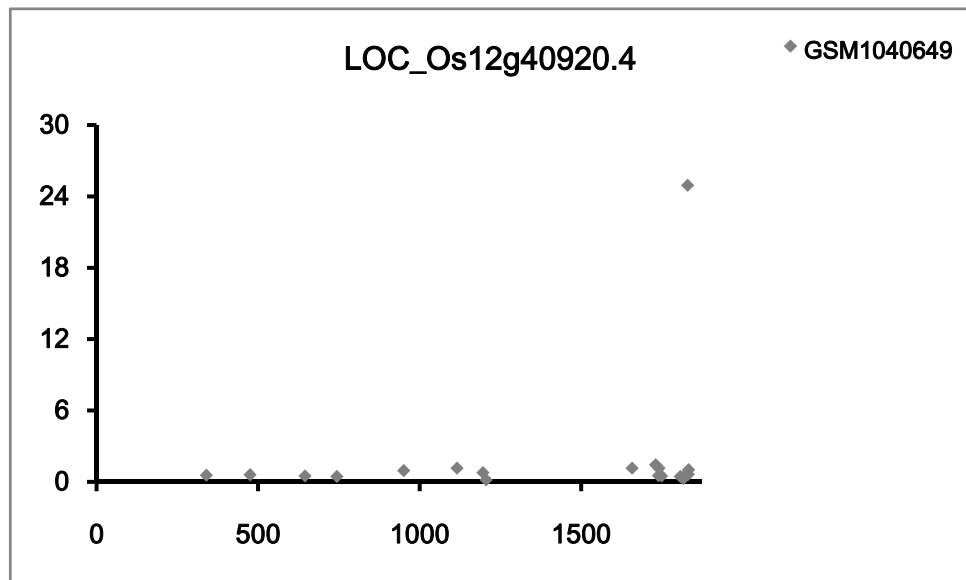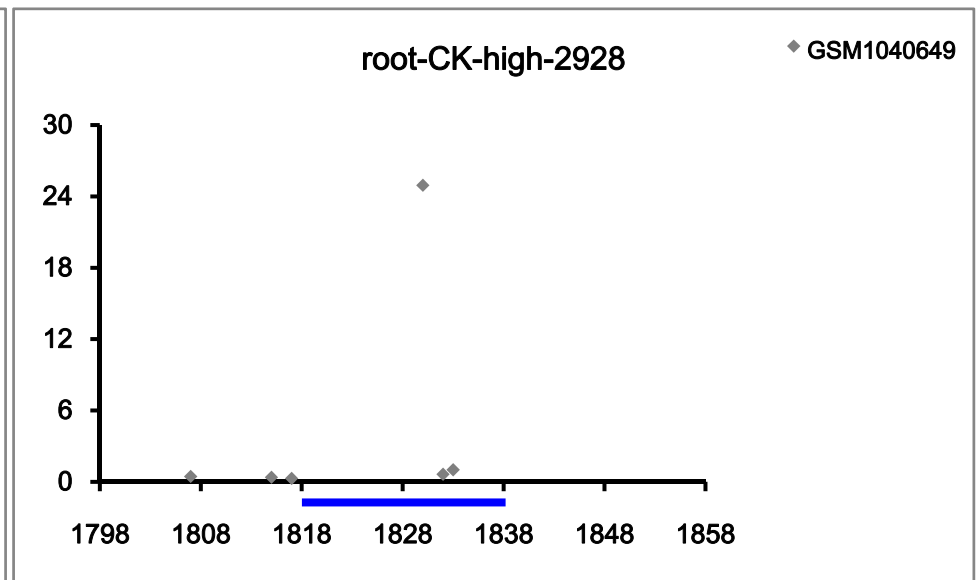

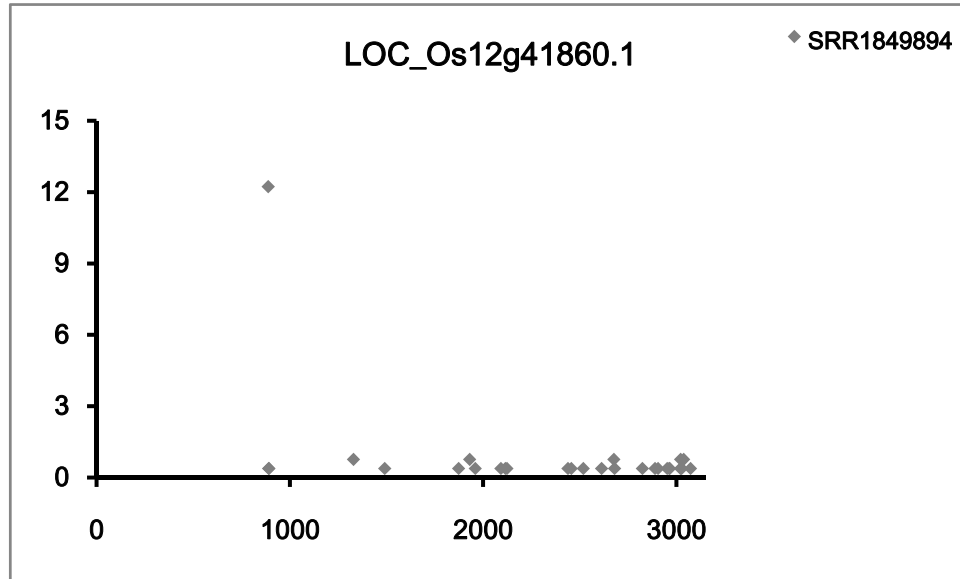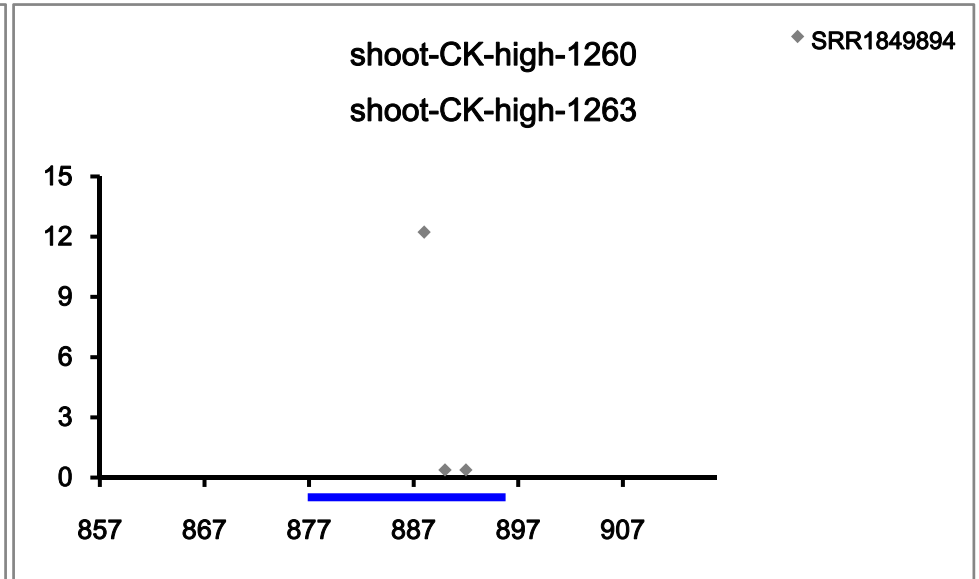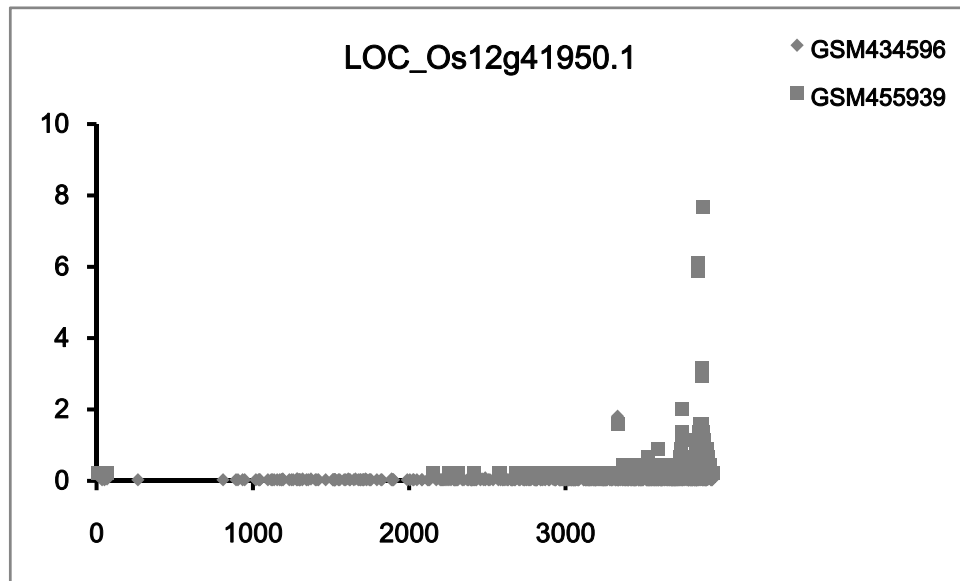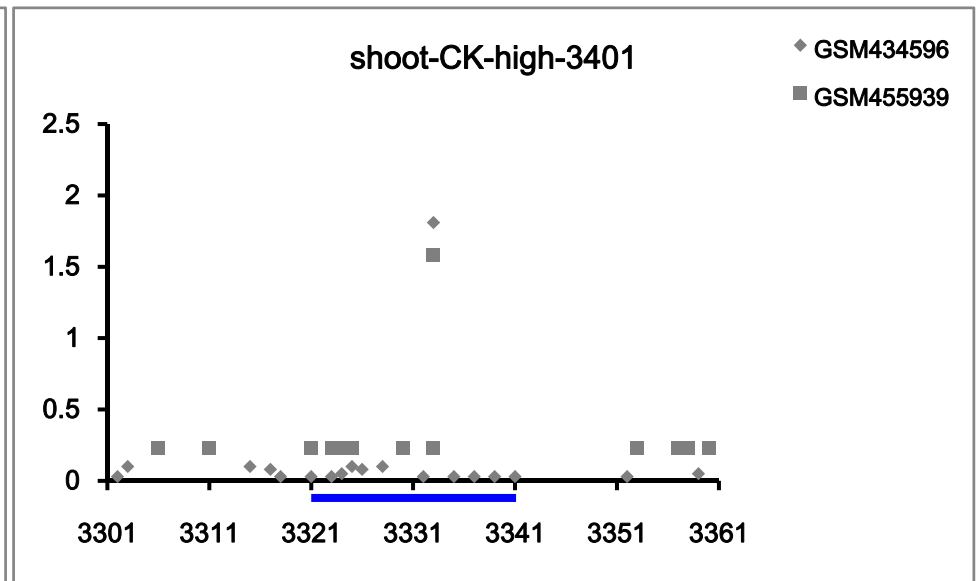

**Figure S3** GO term enrichment in "MF" (Molecular Function) of protein-coding target transcripts.

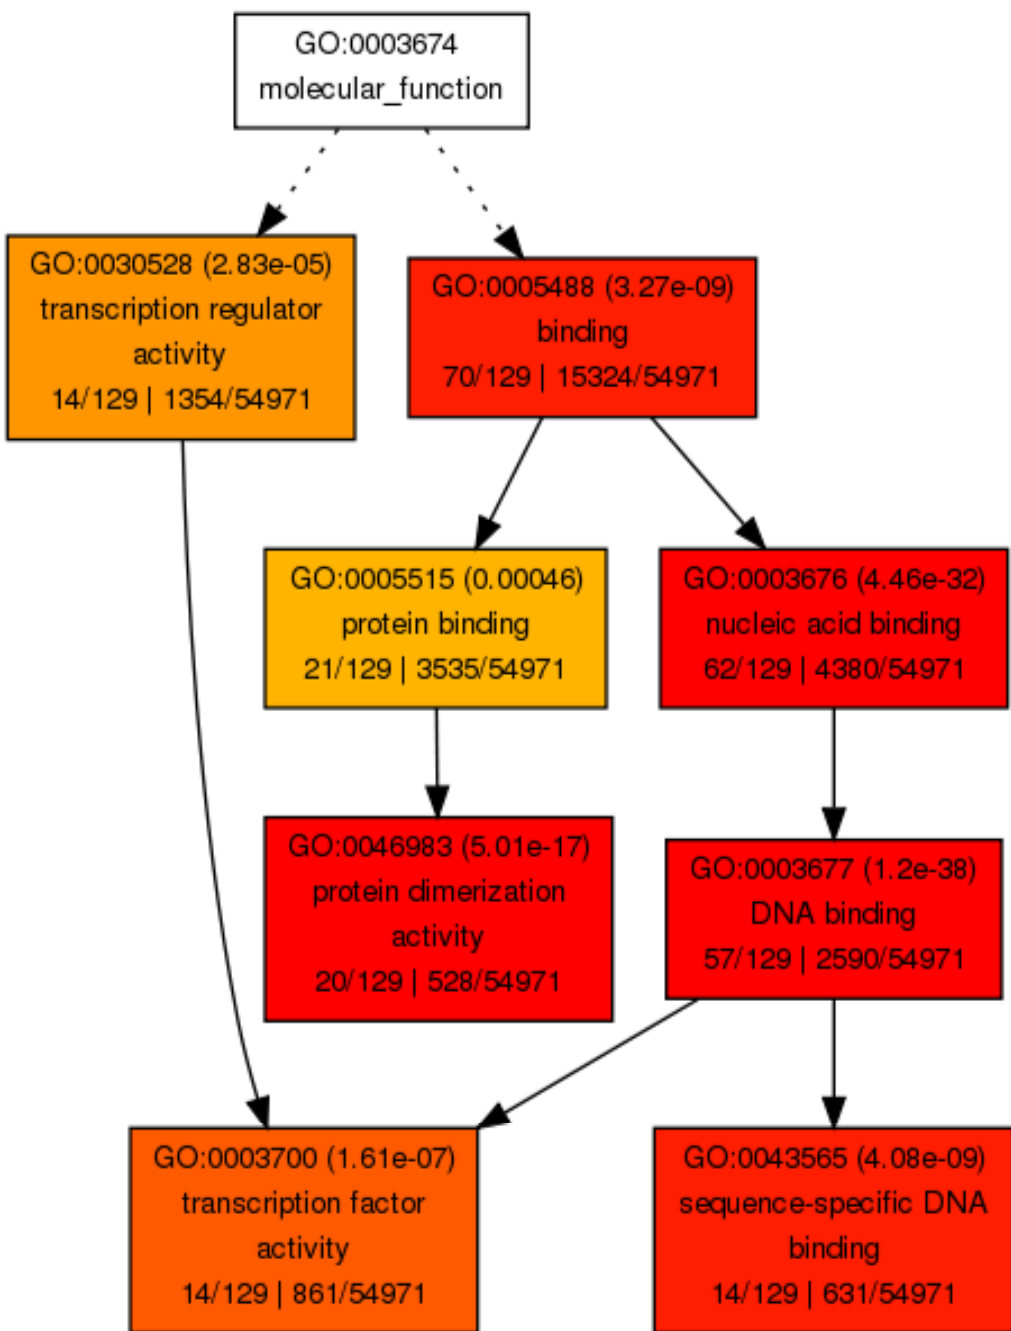

### Significance levels and Arrow types Diagram

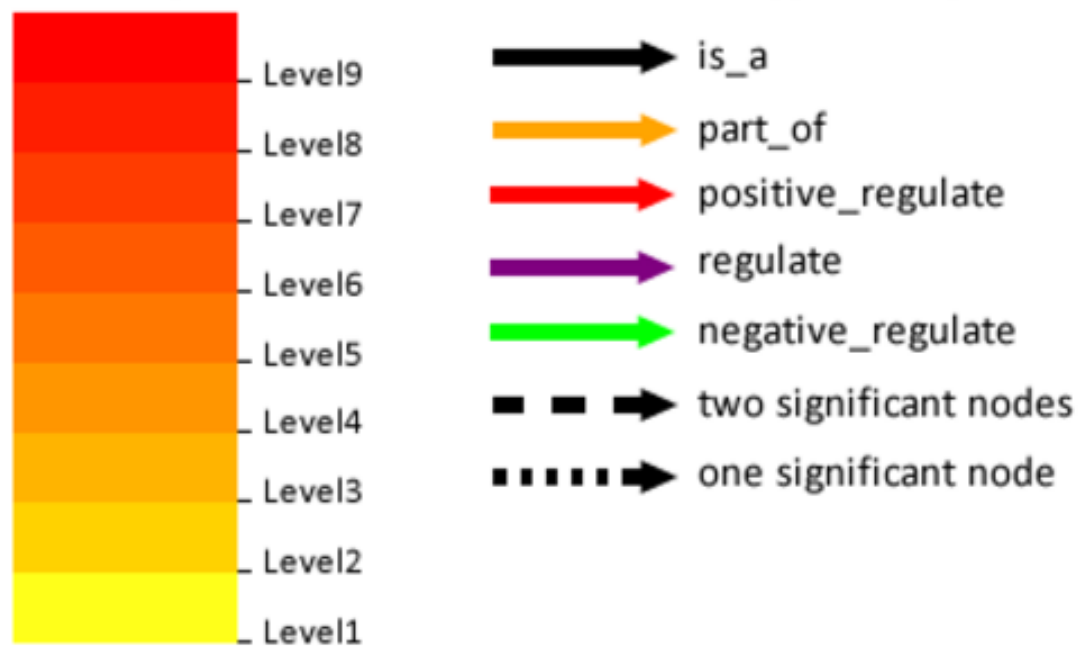

**Figure S4** GO term enrichment in "CC" (Cellular Component) of protein-coding target transcripts.

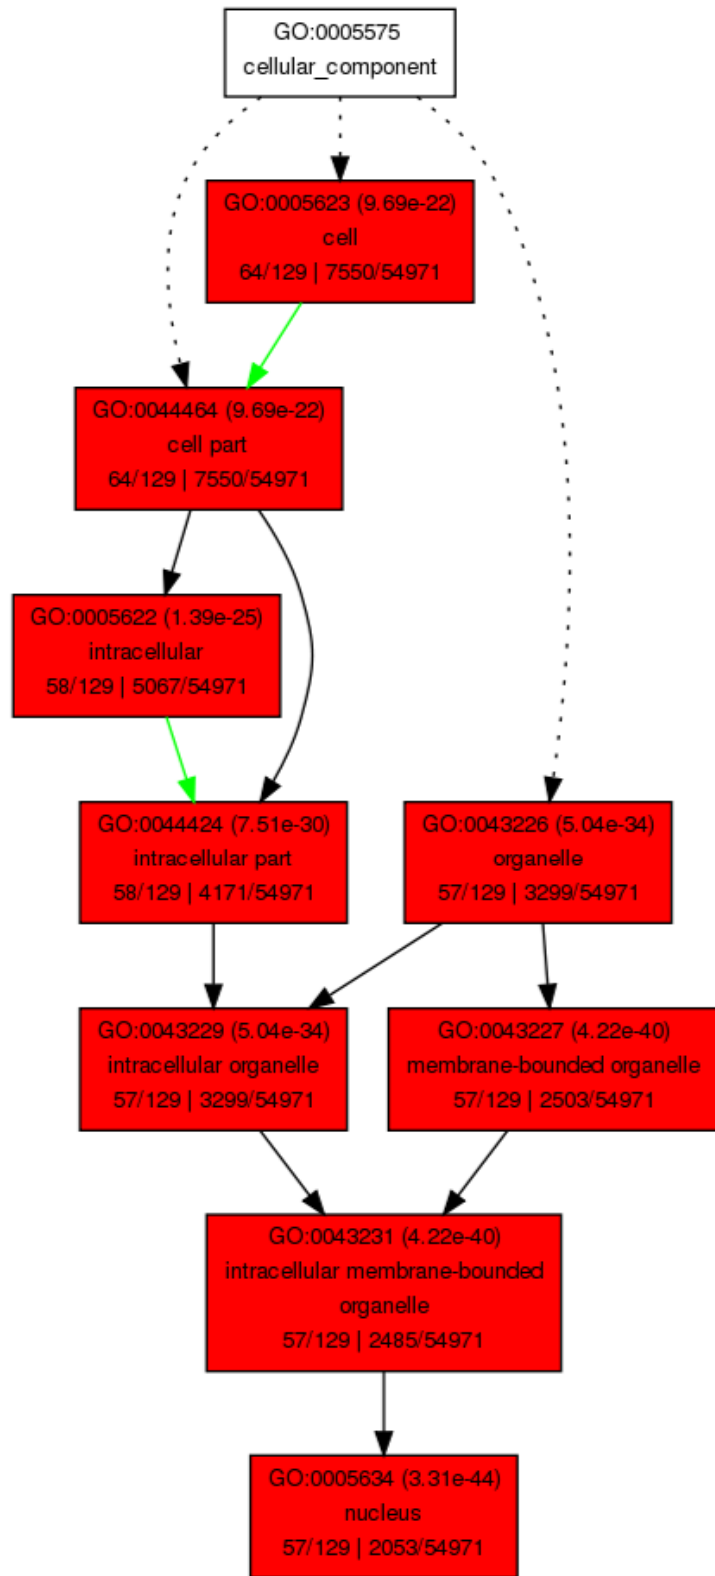

### Significance levels and Arrow types Diagram

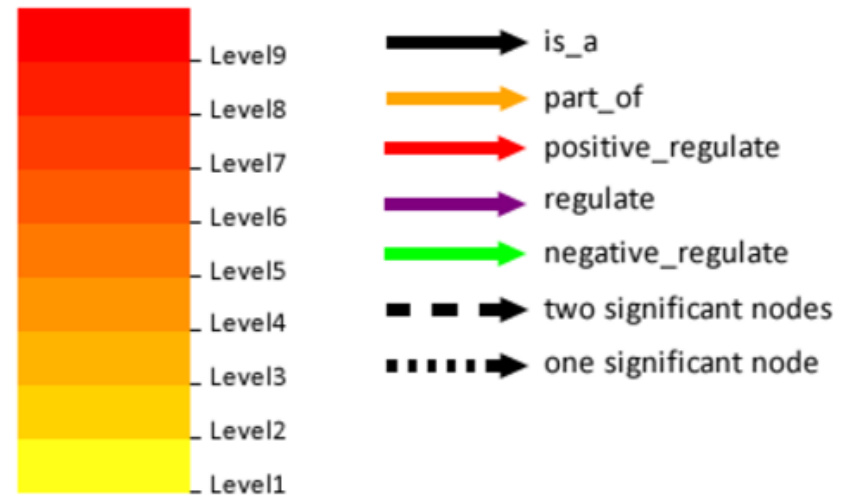

**Figure S5** Regulatory network between arsenic stress-responsive small RNAs and protein-coding targets.



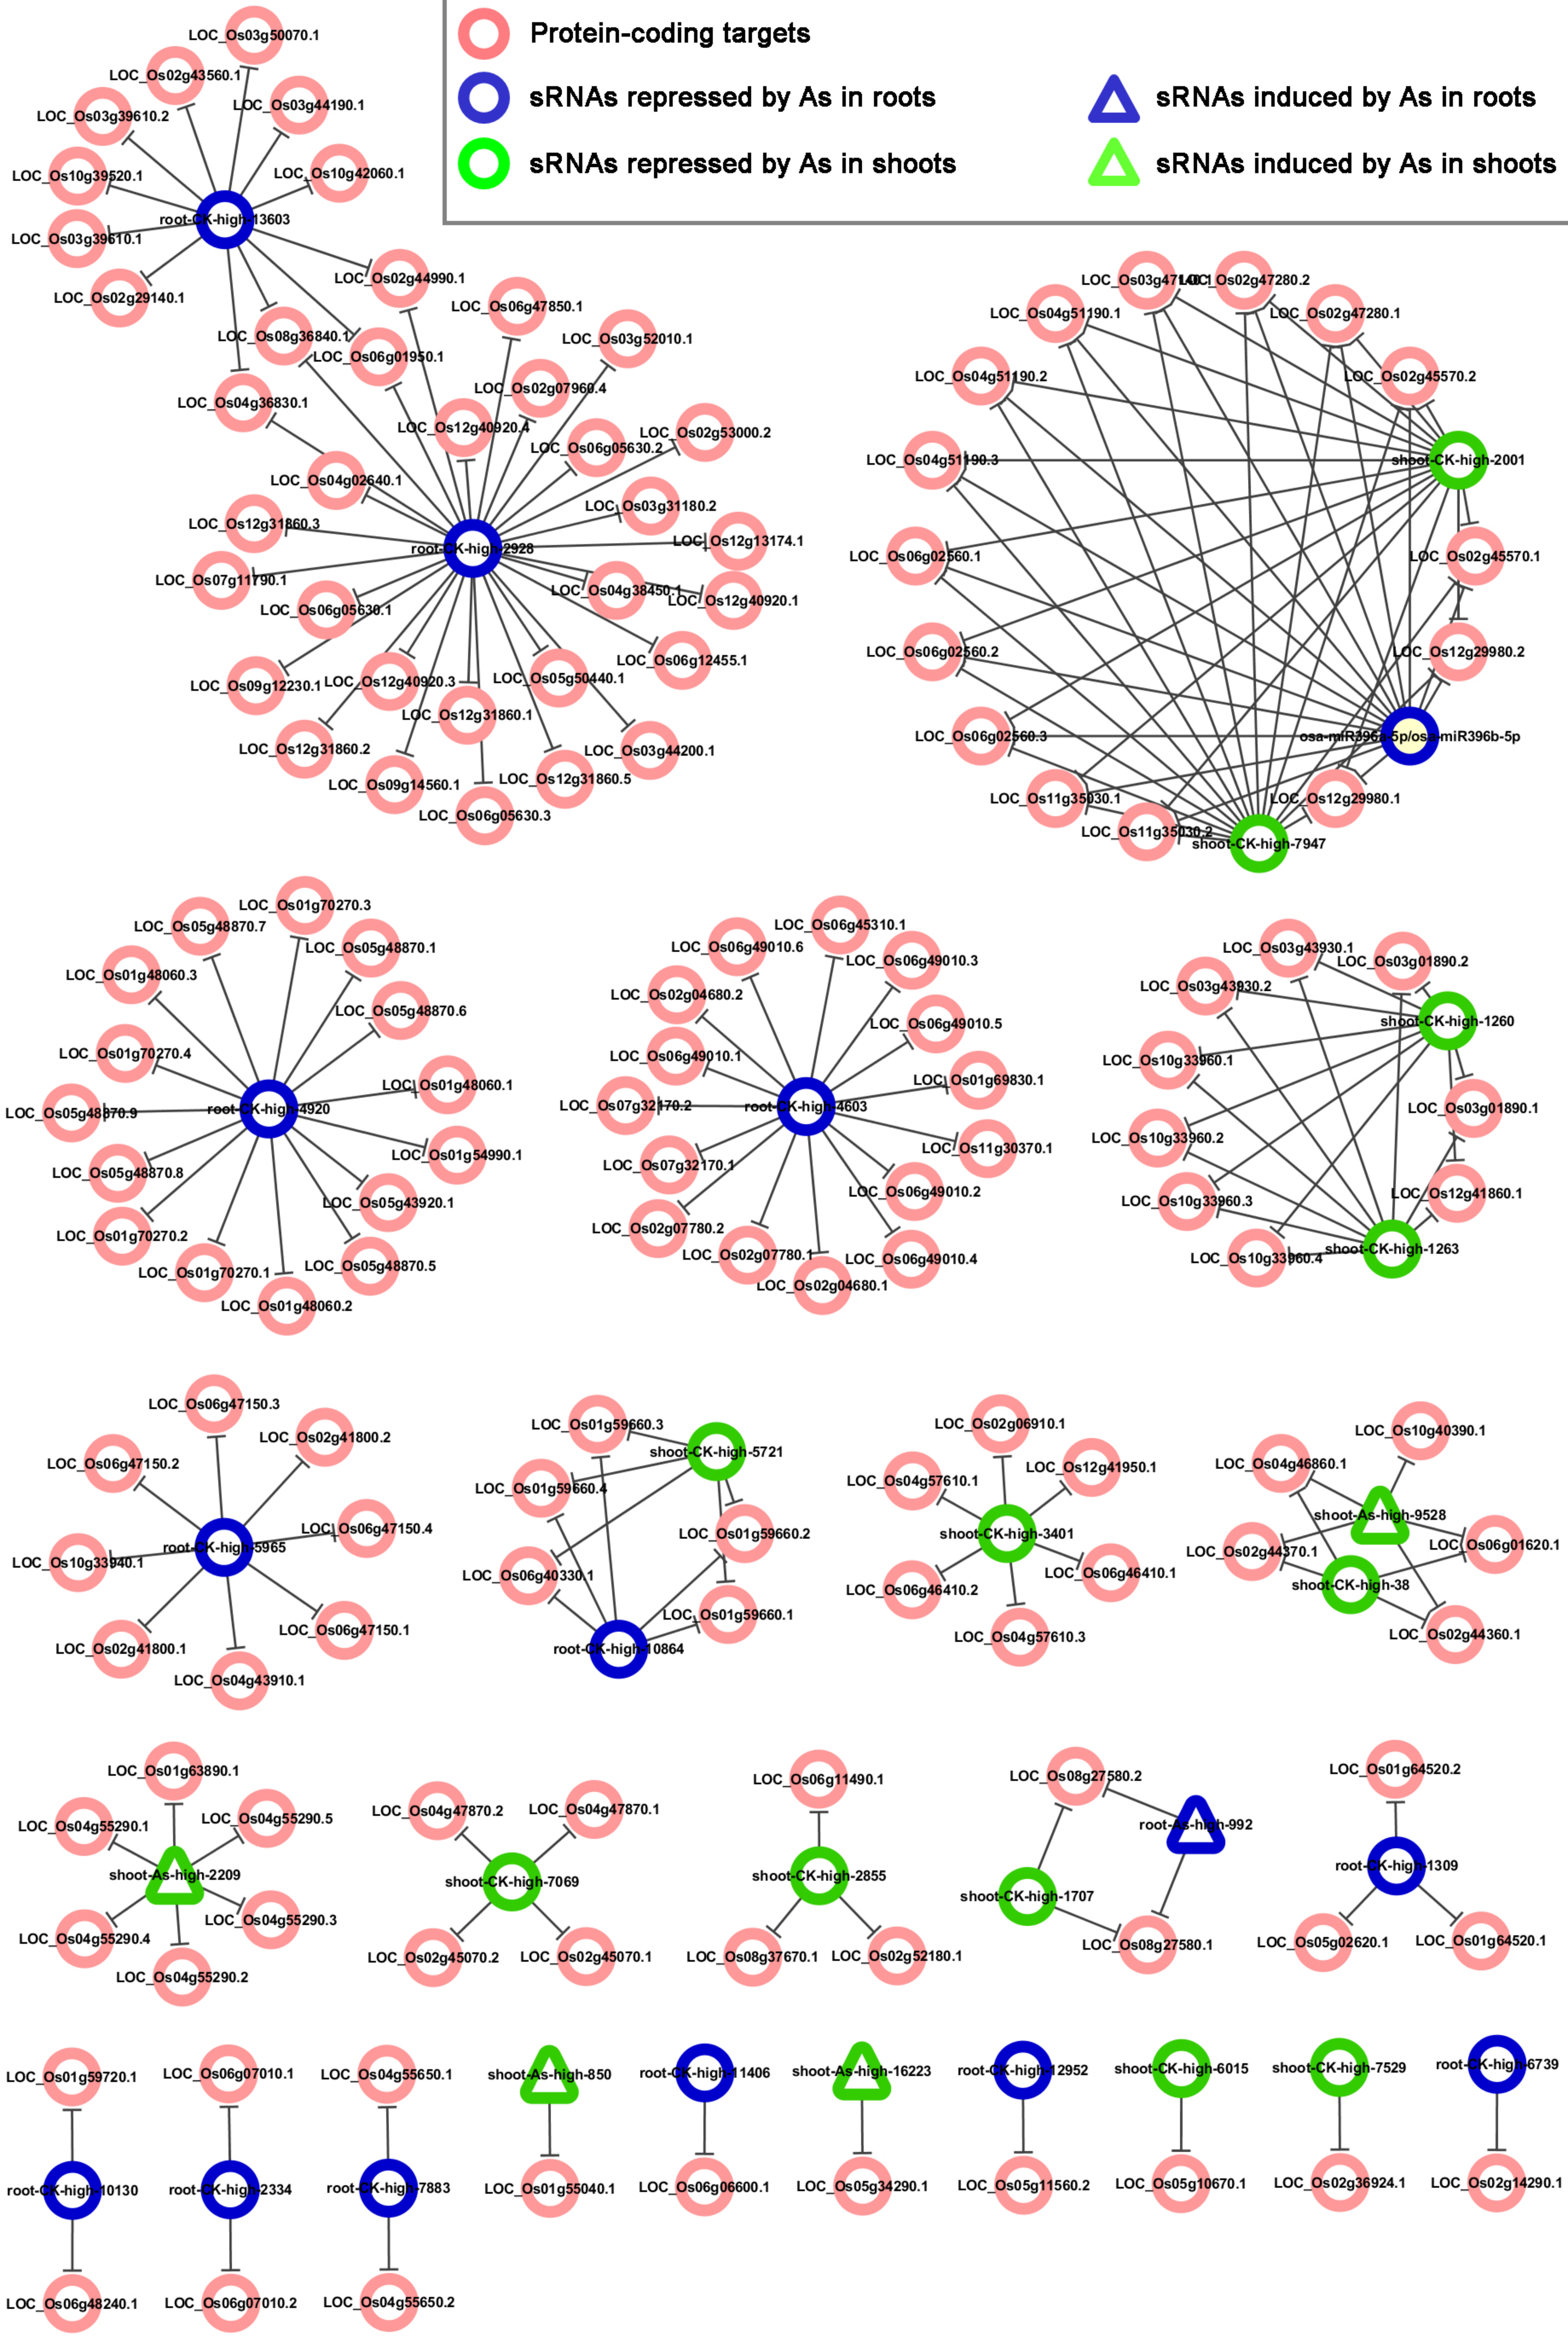

**Figure S6** Degradome sequencing data-based evidence showing the long non-coding RNAs (lncRNAs) regulated by the arsenic stress-responsive small RNAs. On each page, the degradome sequencing evidence is displayed as target plots (t-plots) for each small RNA (sRNA)--target pairs. The first t-plot presents the global distribution of degradome signals along the full-length target transcript, with lncRNA ID and degradome-seq data set IDs shown on the top. The other panel(s) provide(s) a detailed view of degradome signals surrounding the predicted binding site (blue line) of the arsenic-responsive sRNA (ID shown on the top) on the target transcript, which clearly shows the degradome-seq evidence (marked by red arrowheads) supporting the regulatory relationship. For each t-plot, the Y axis measures the degradome signal intensity in RPM (reads per million), and the X axis indicate the position on the target transcript.

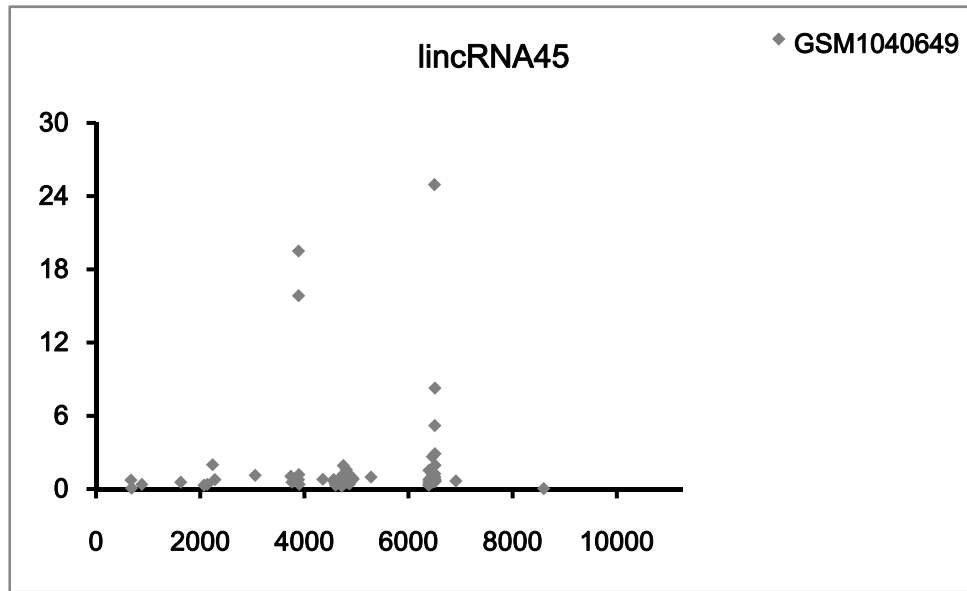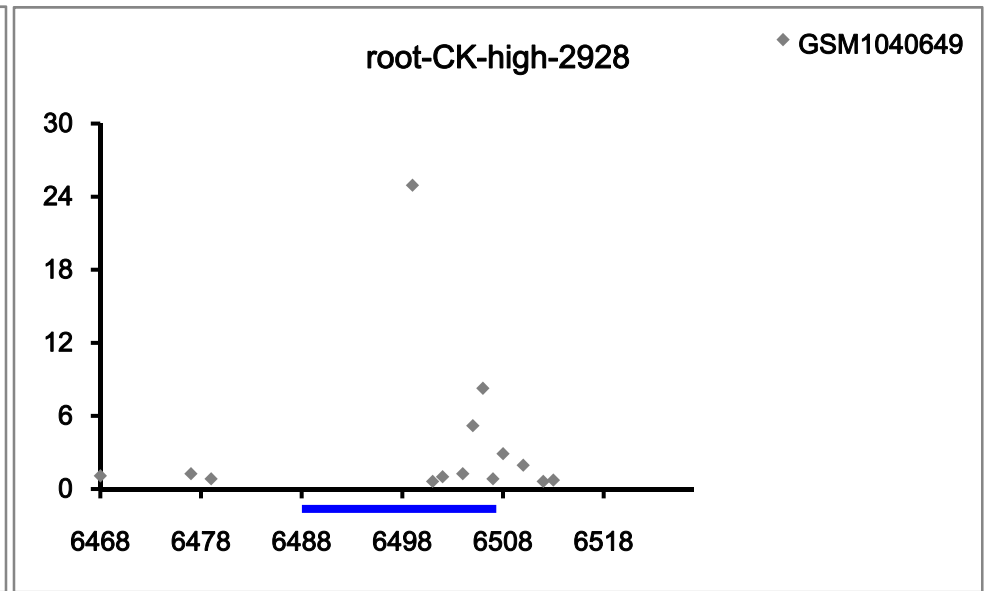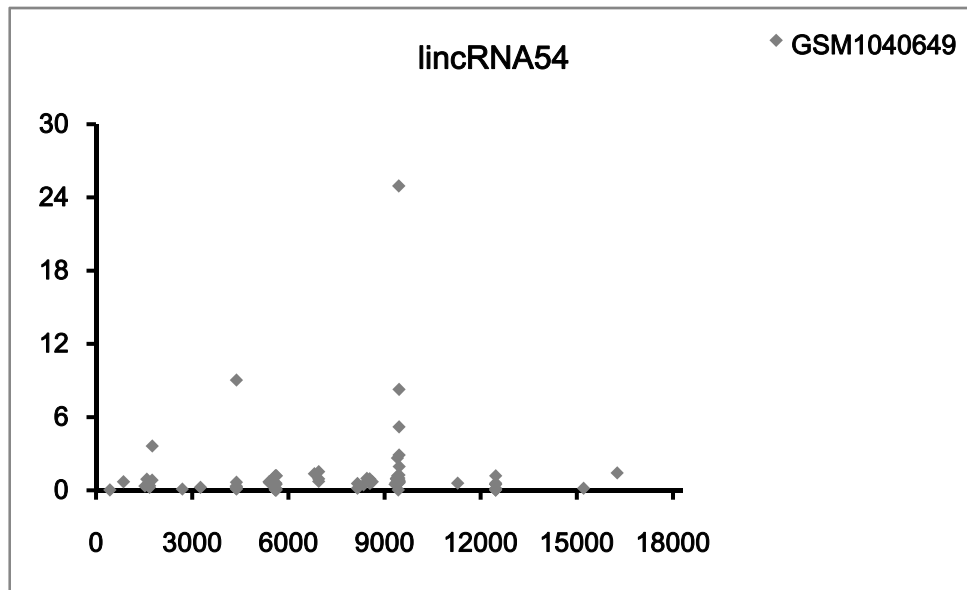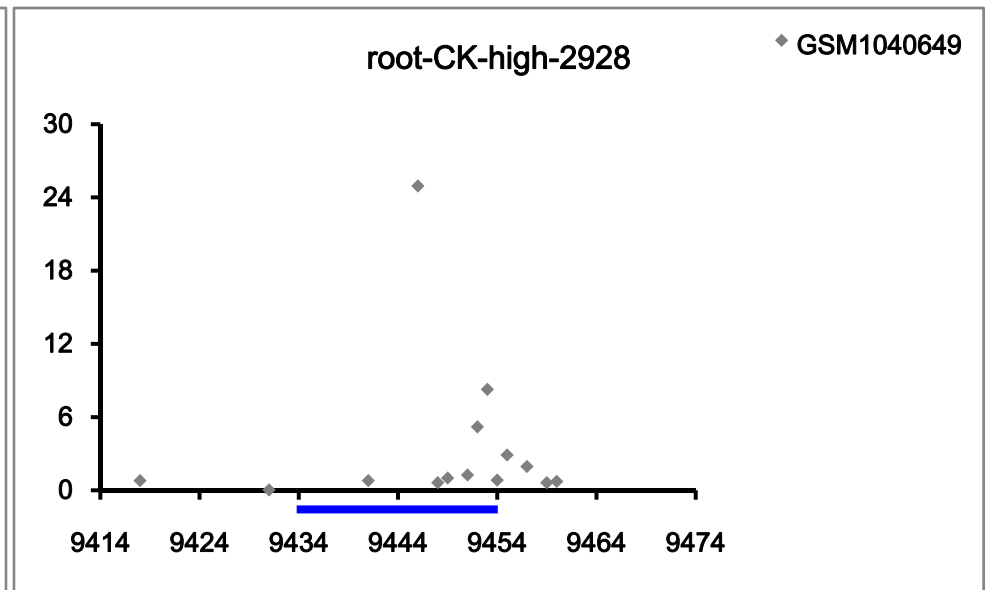

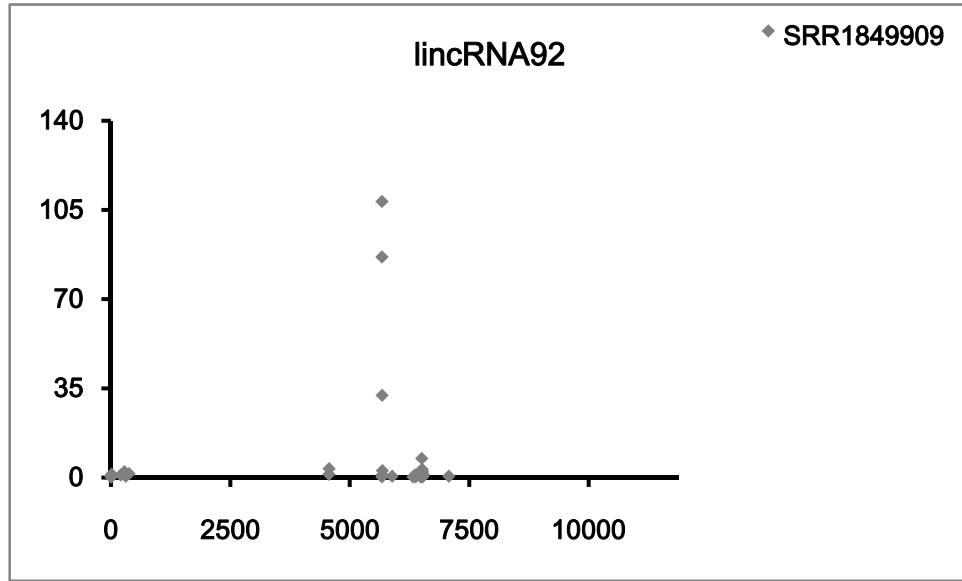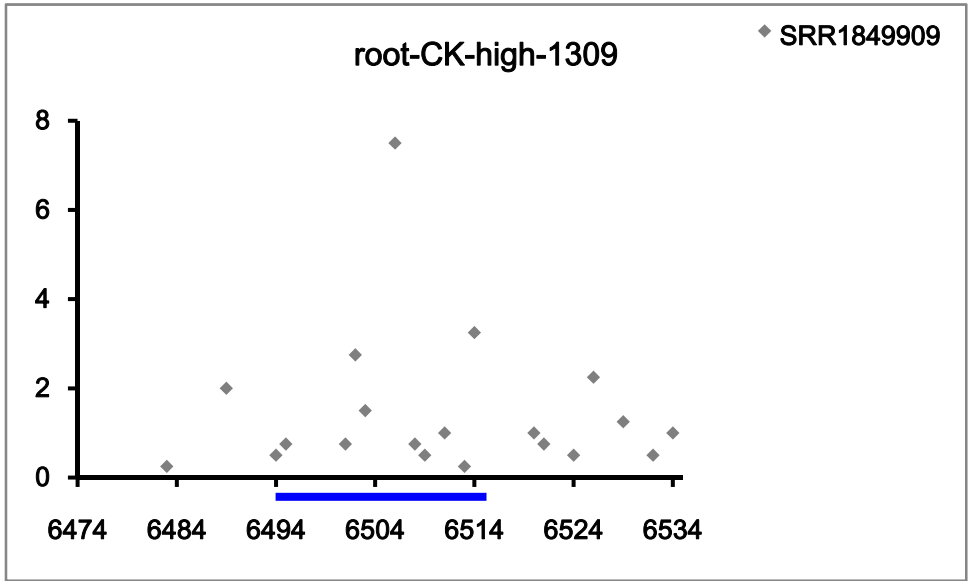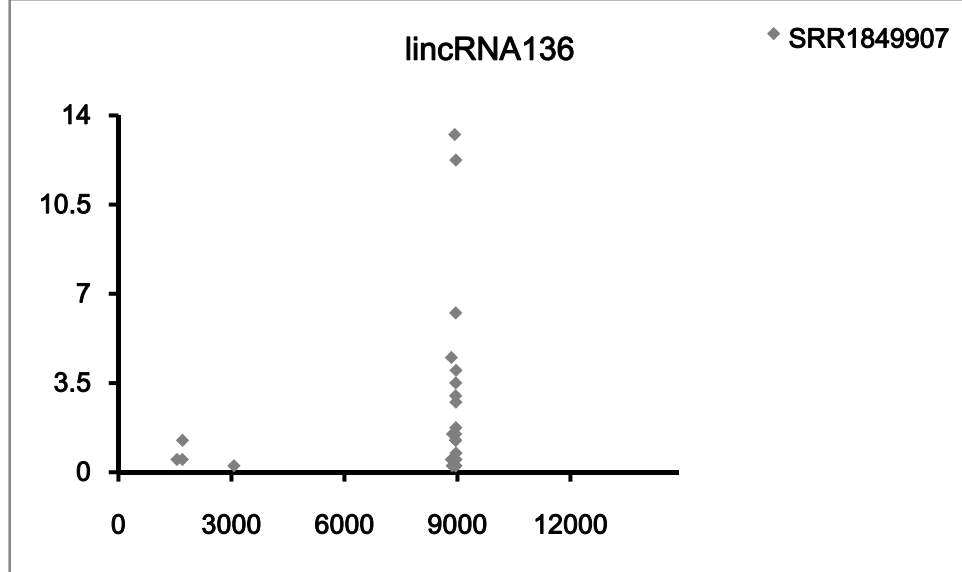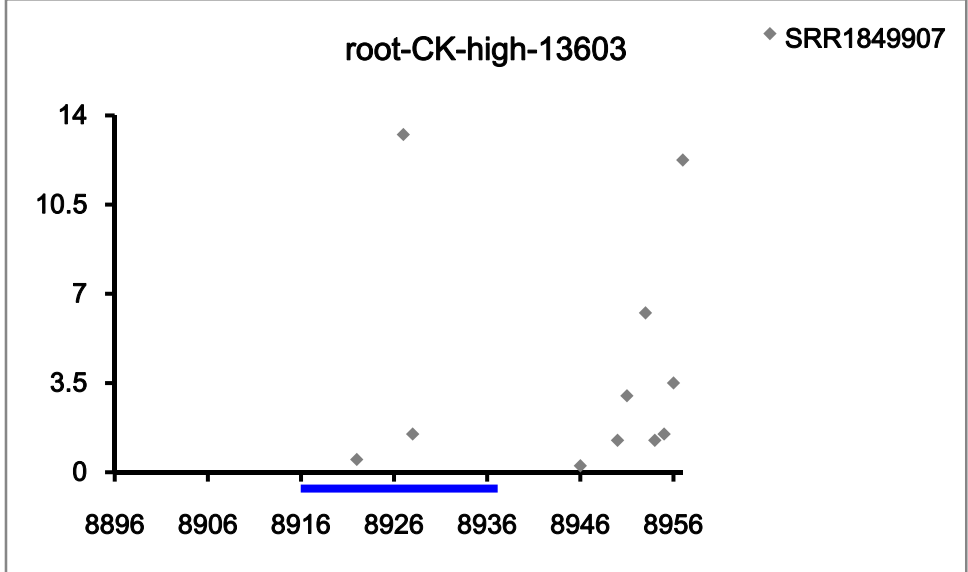

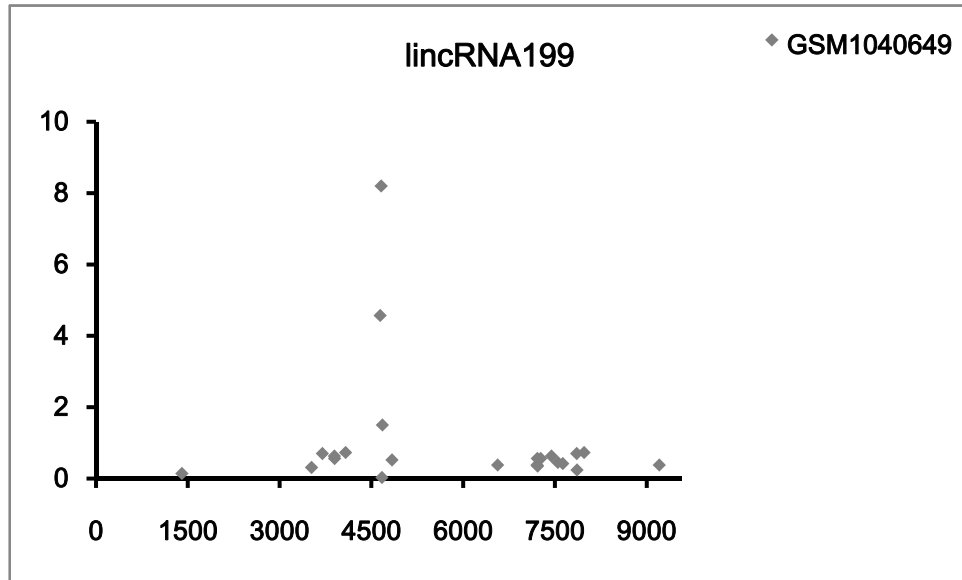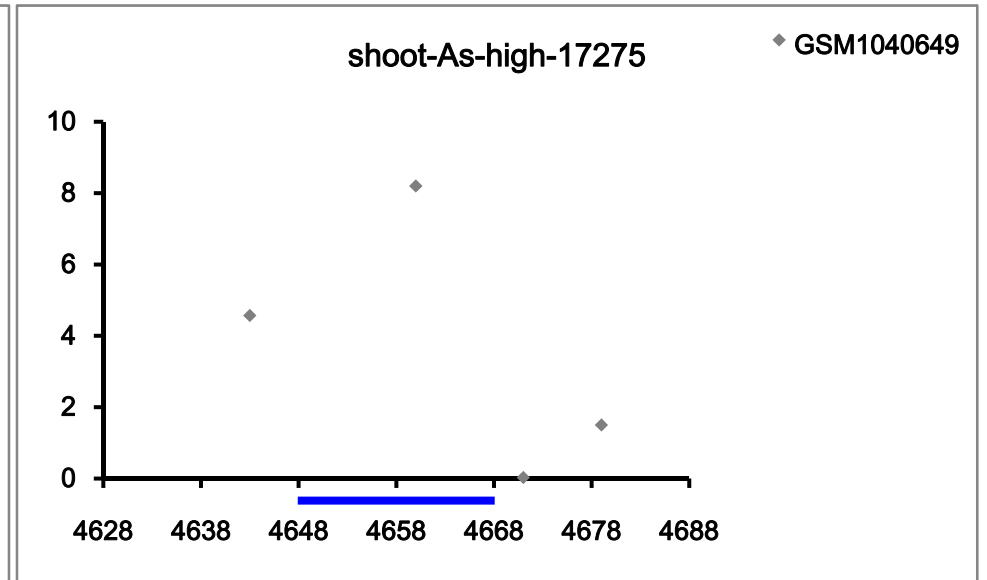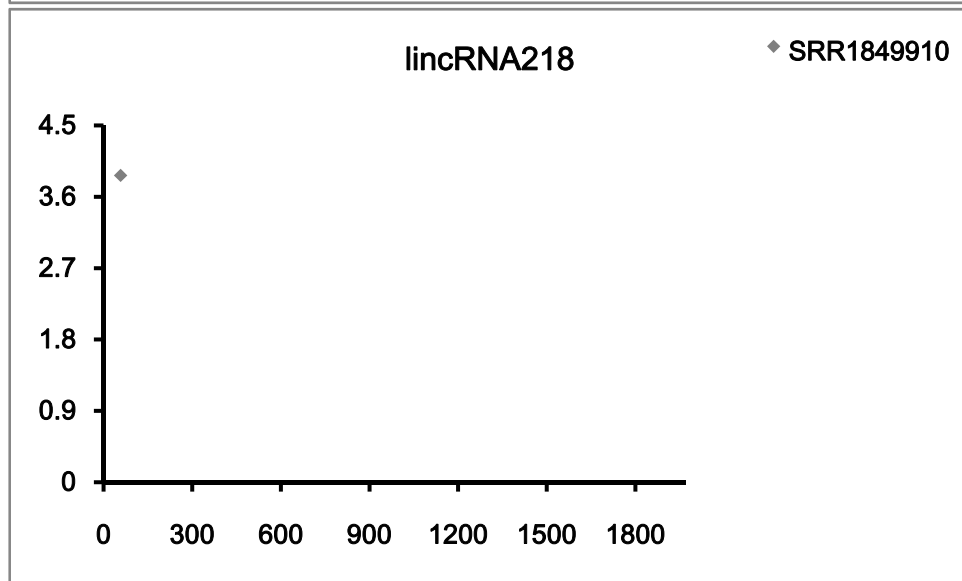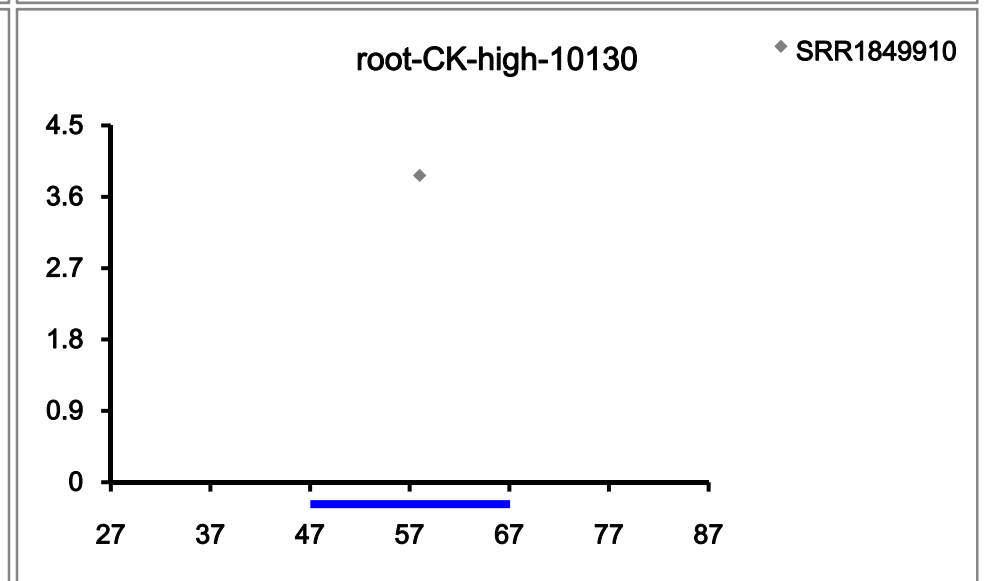

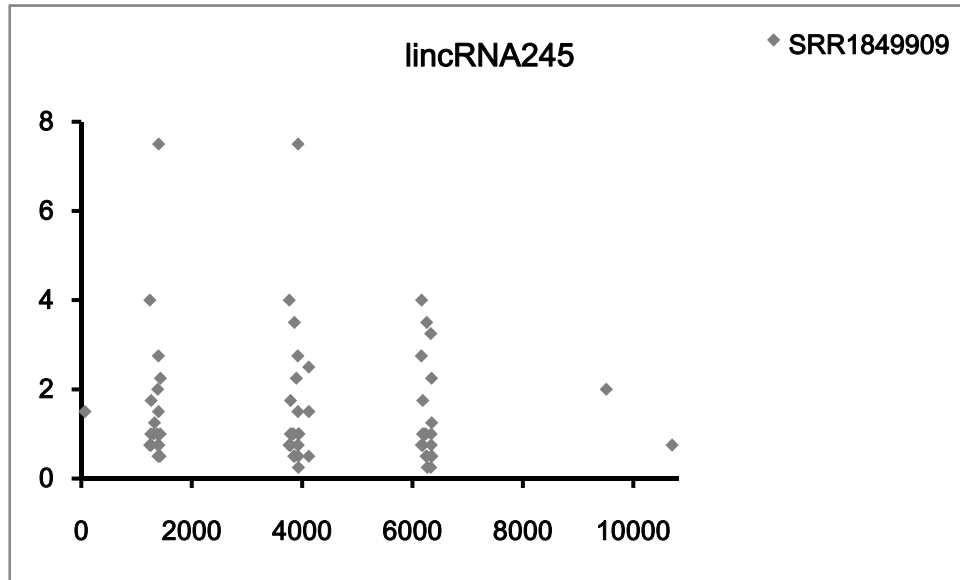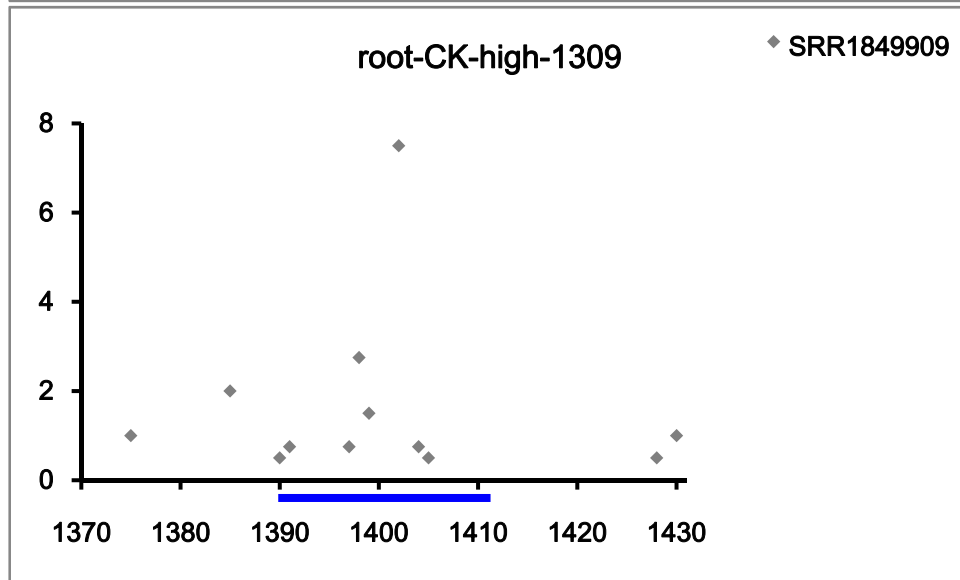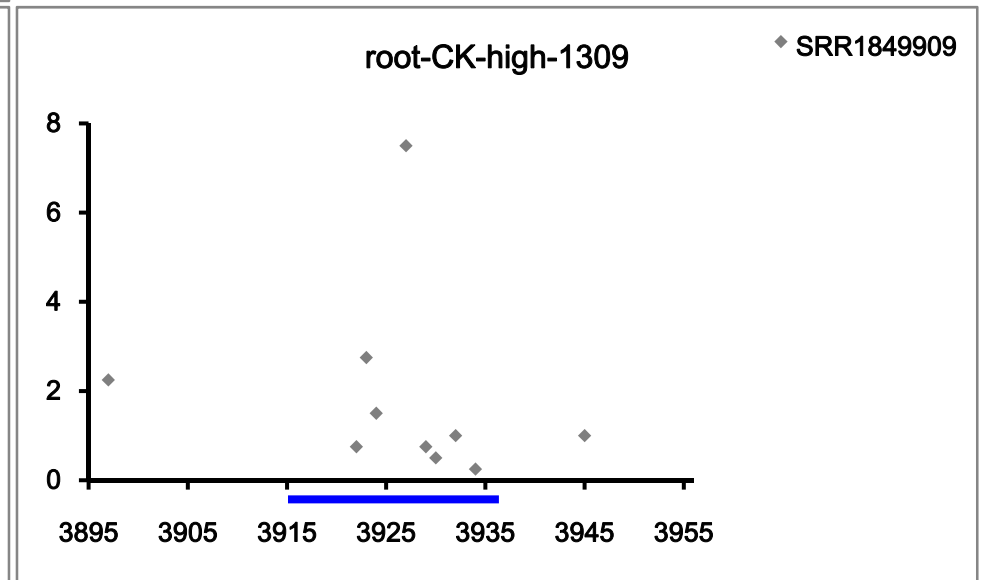

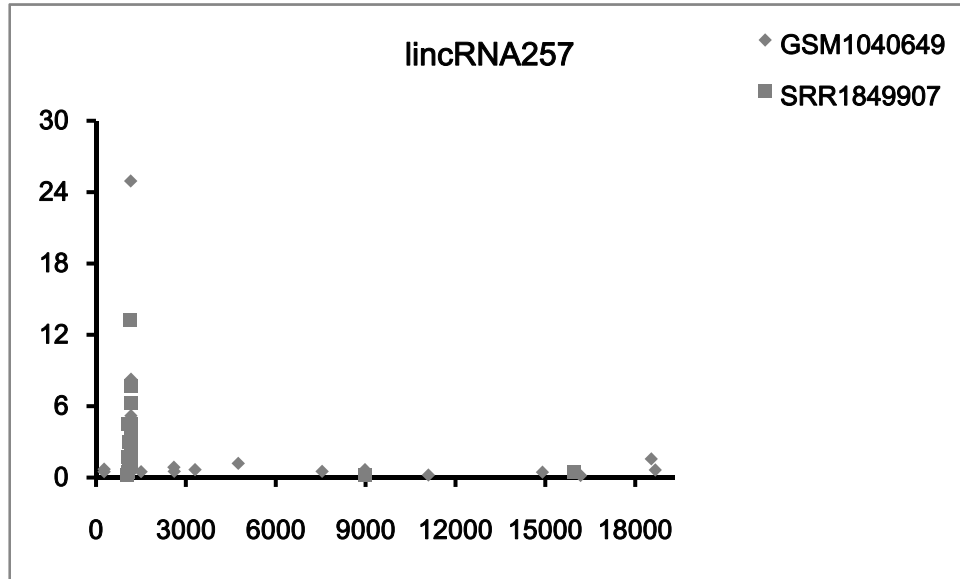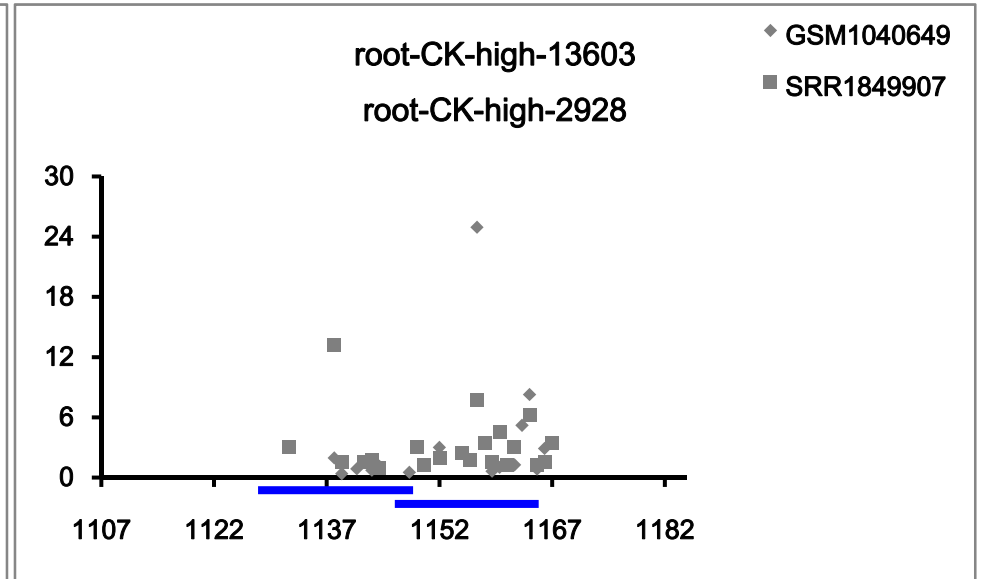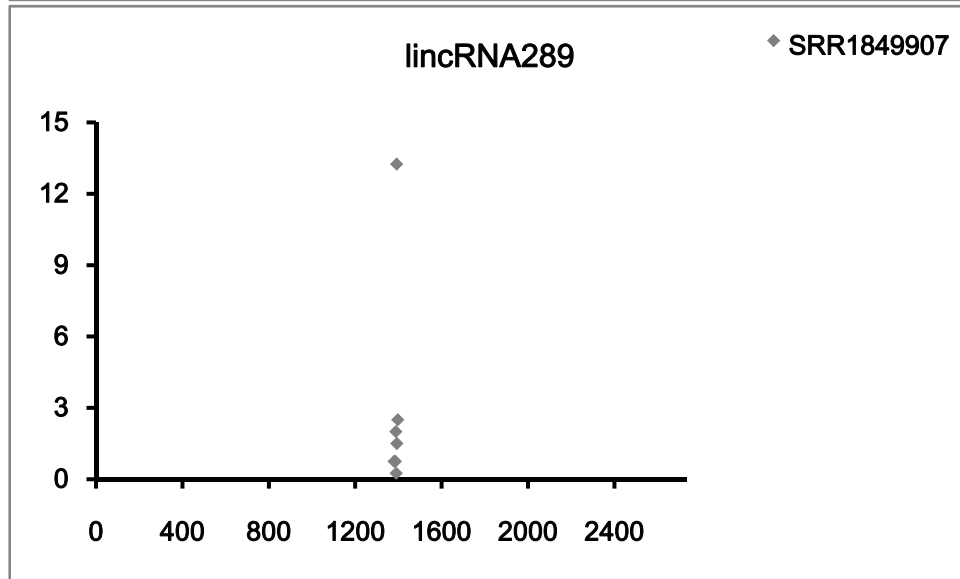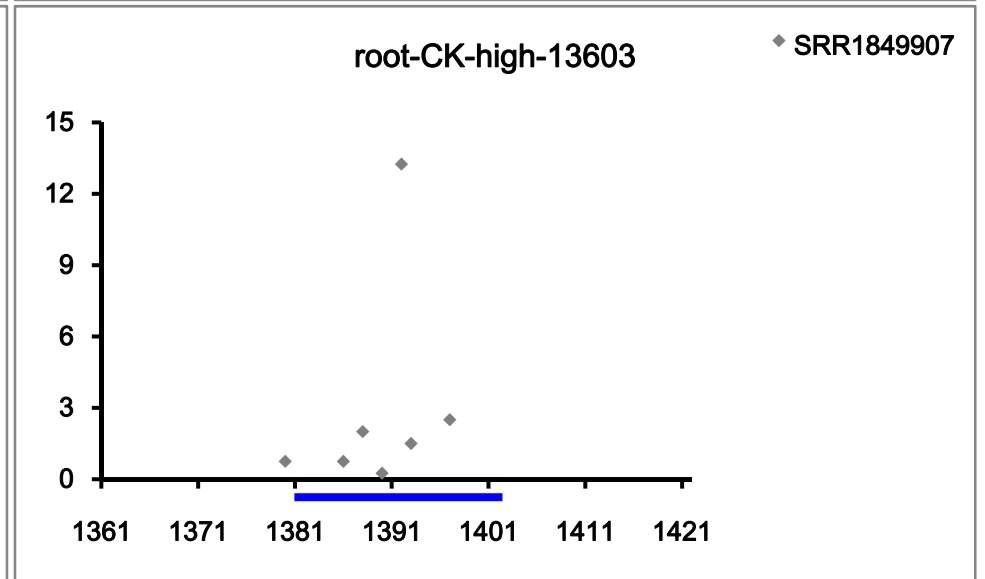





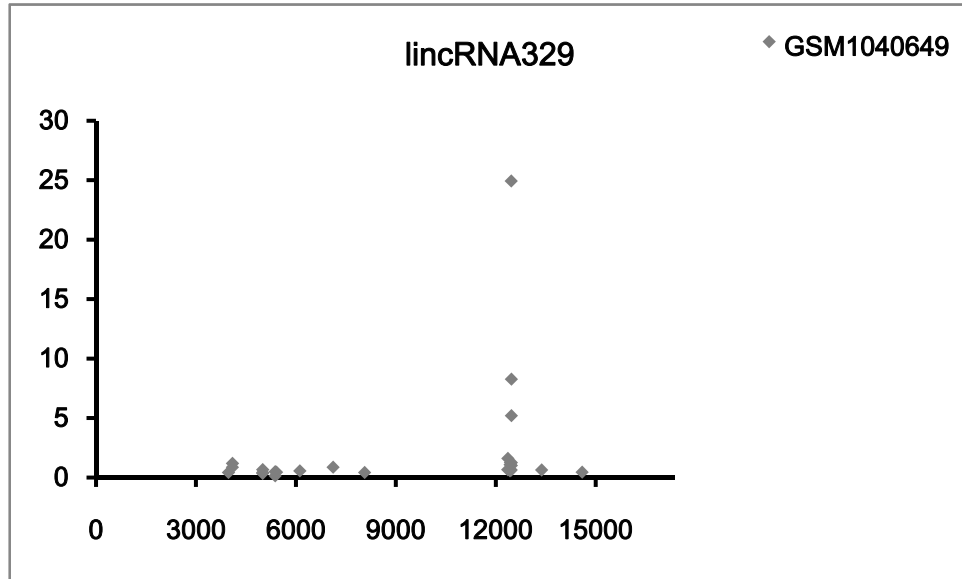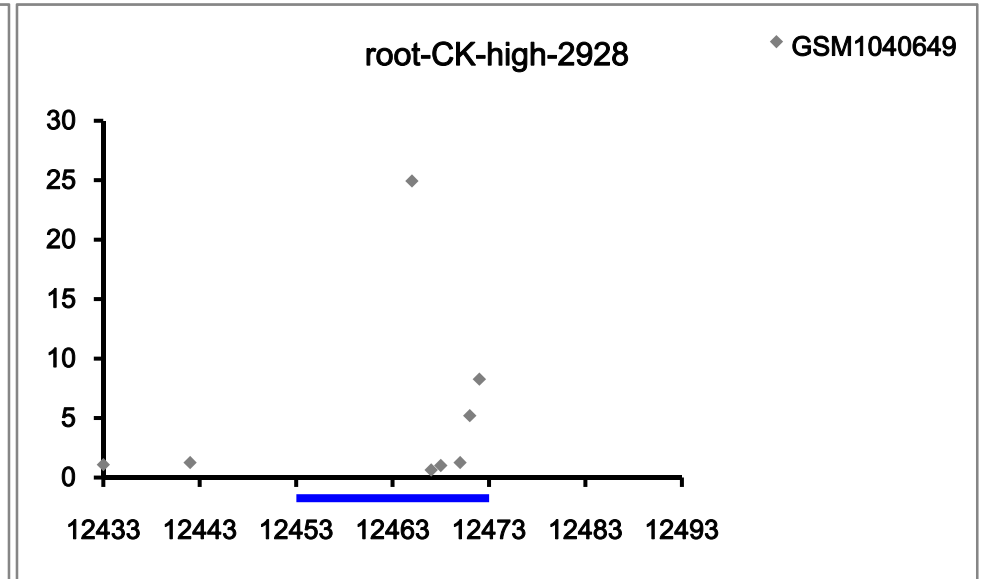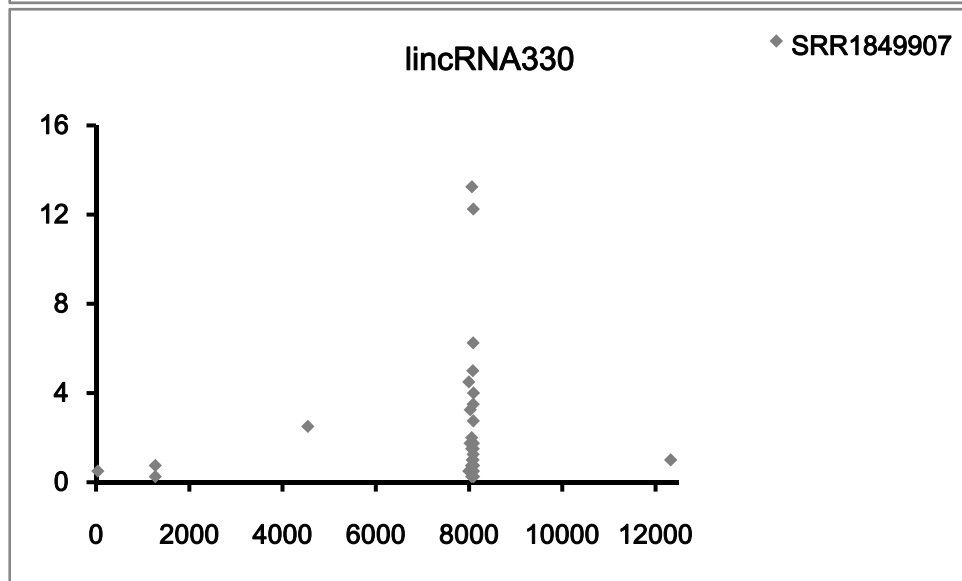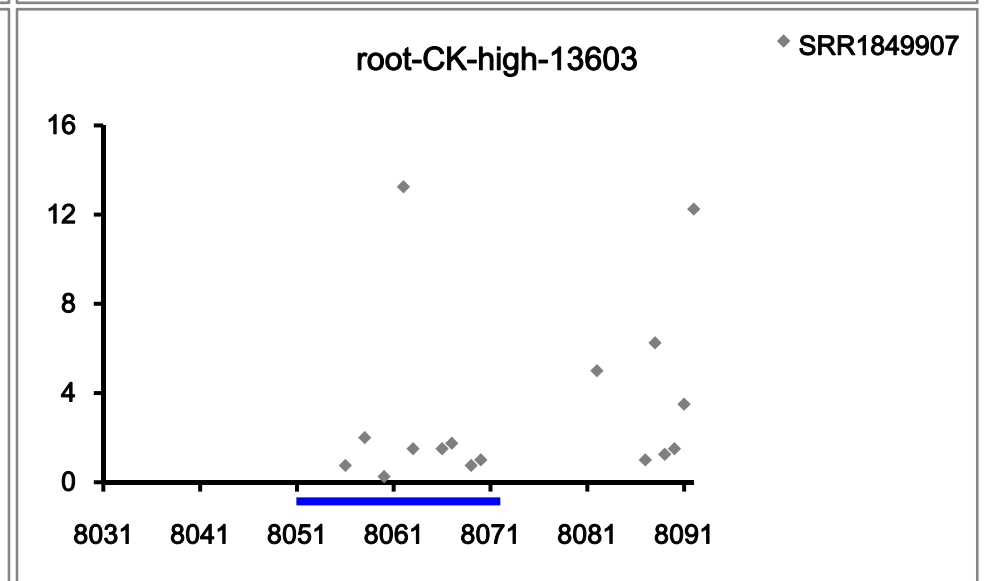

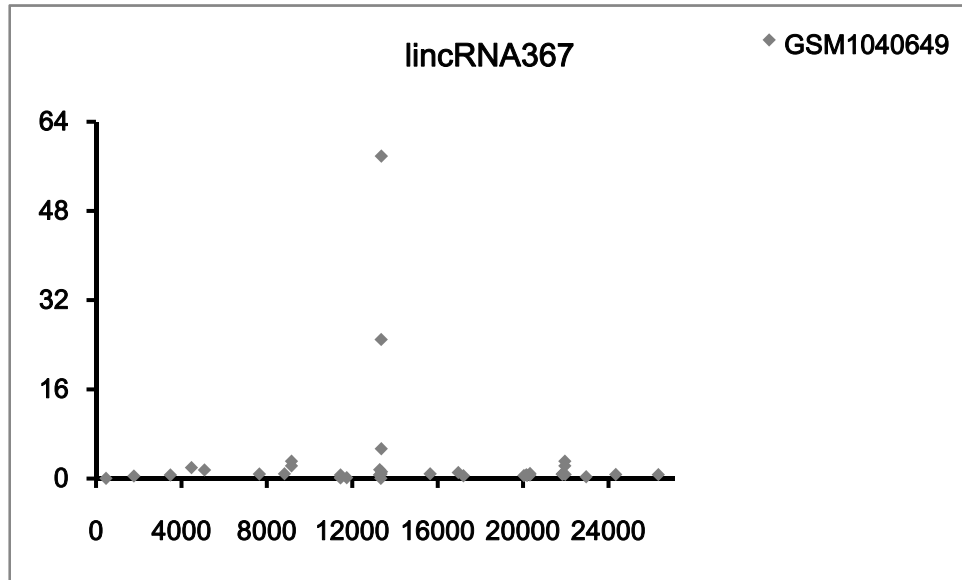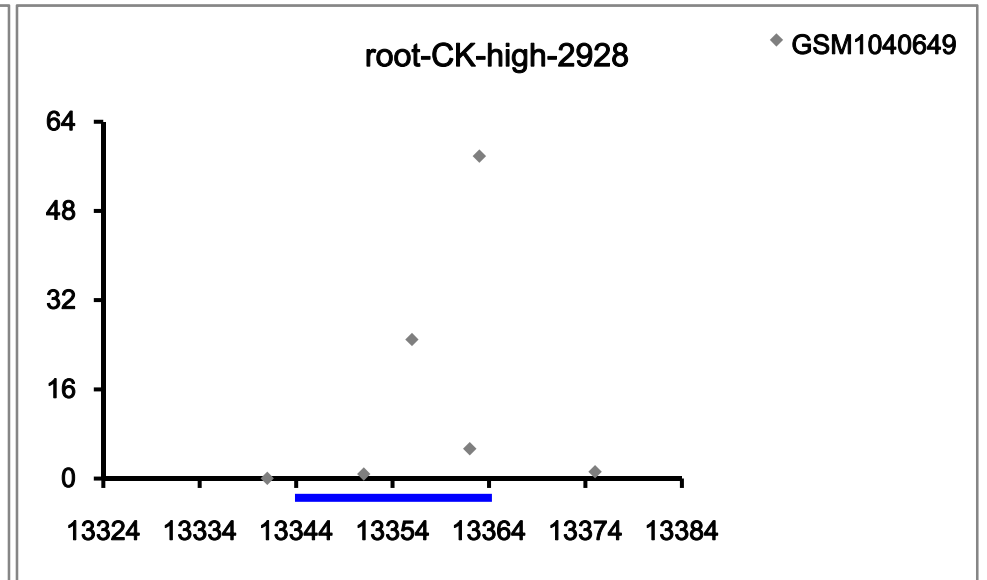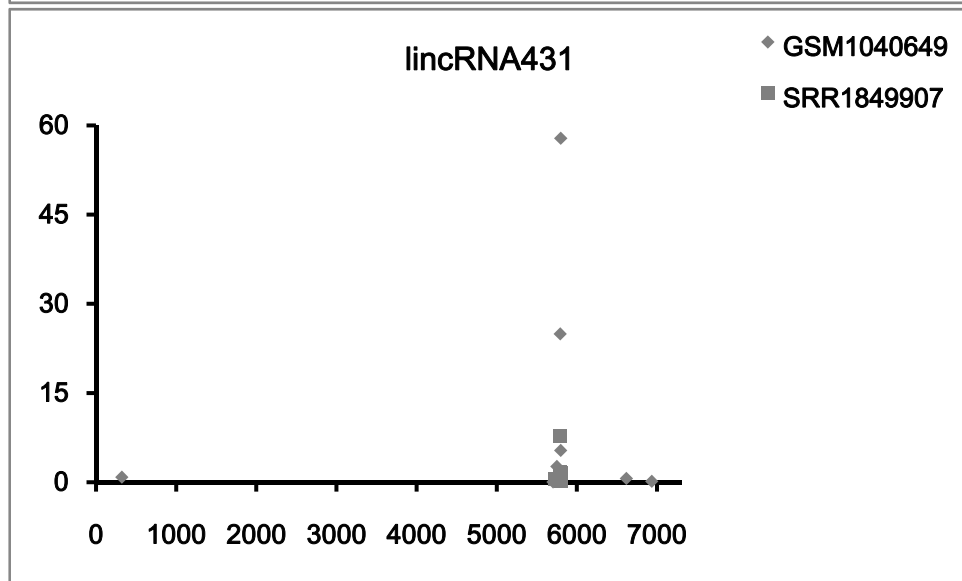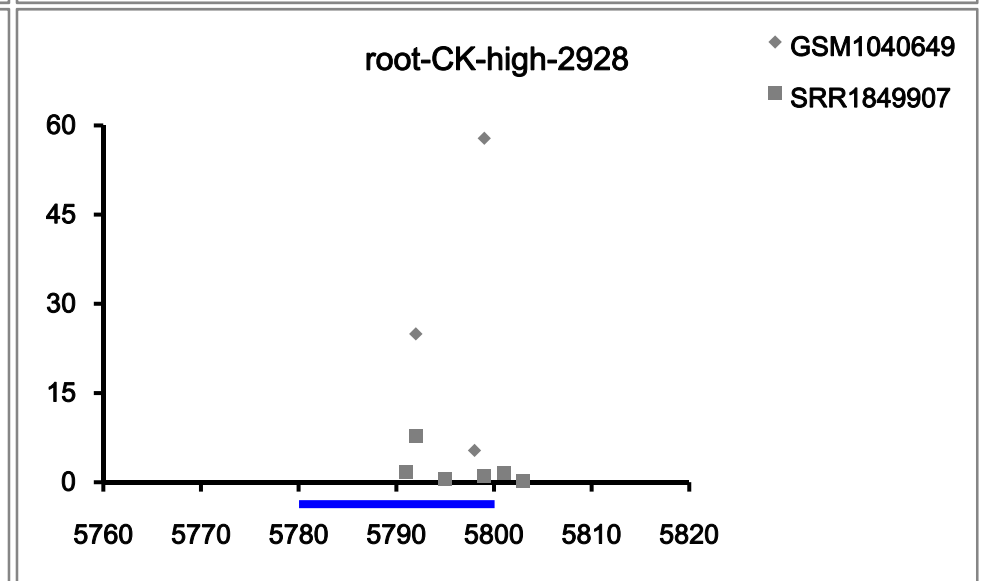

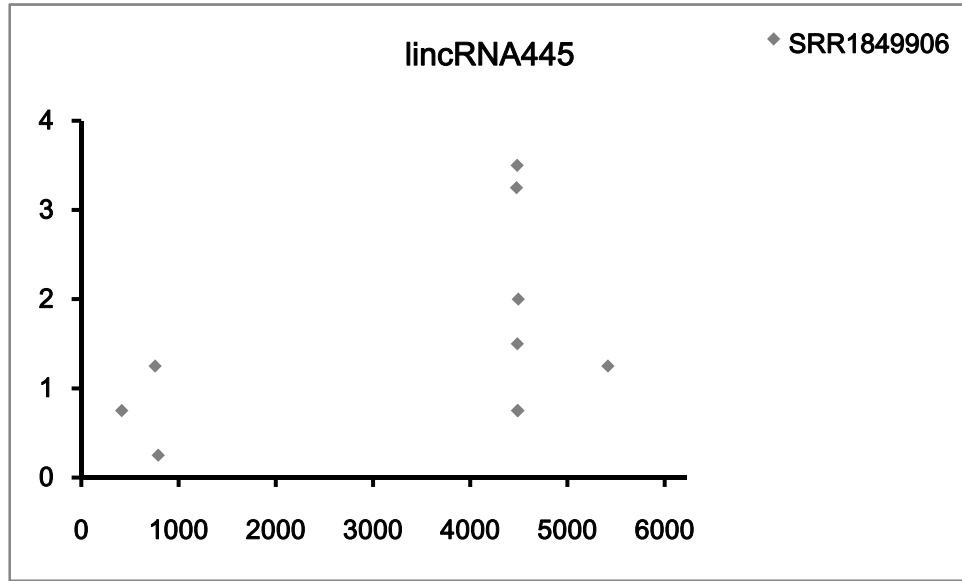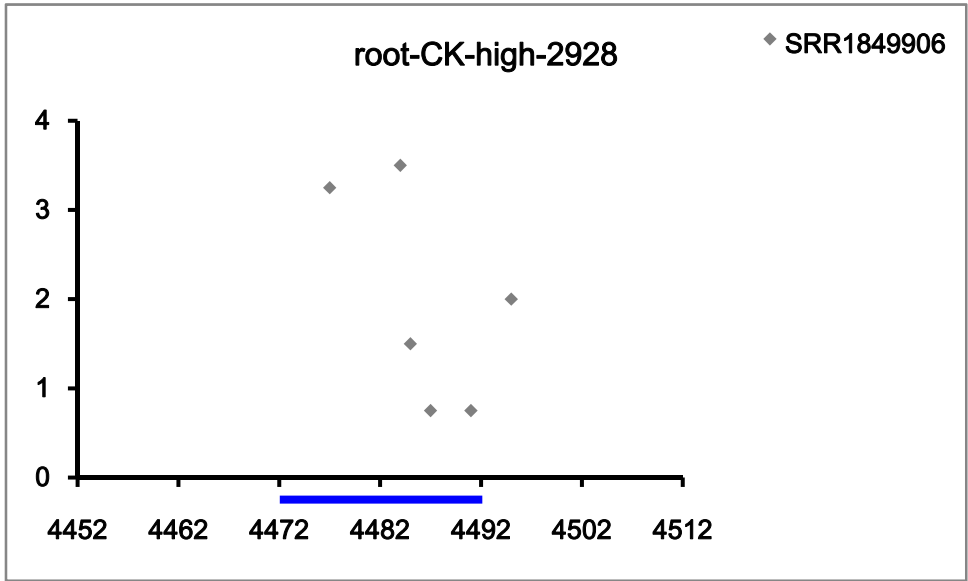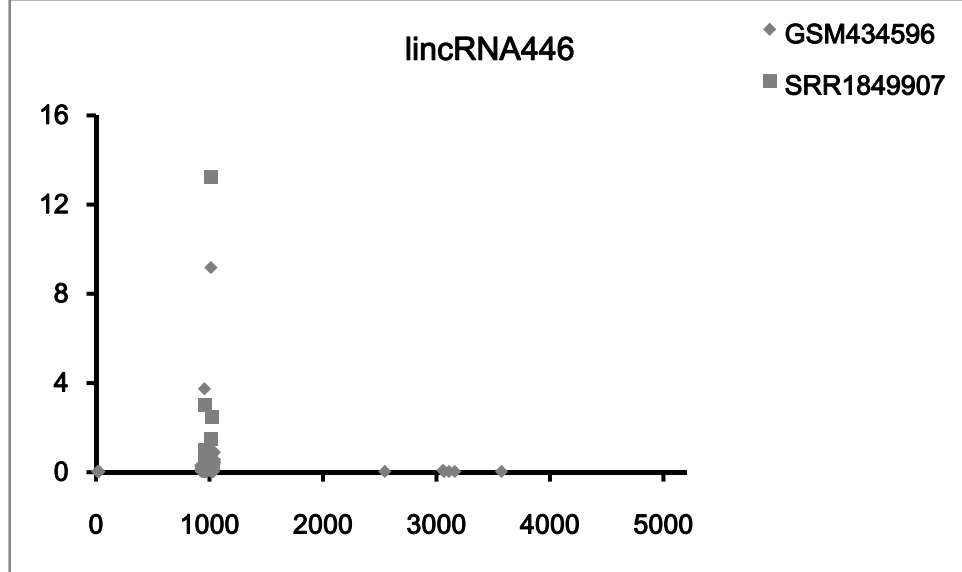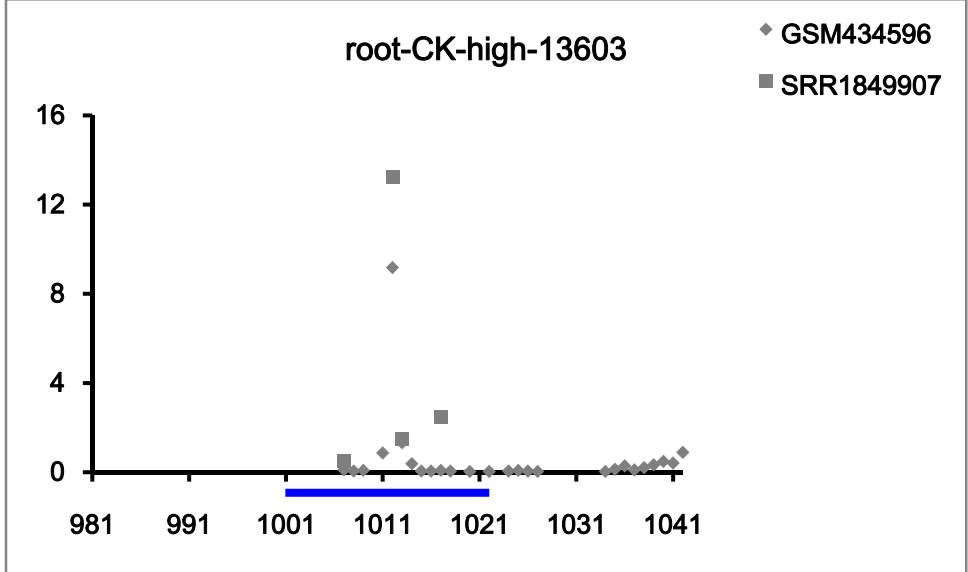

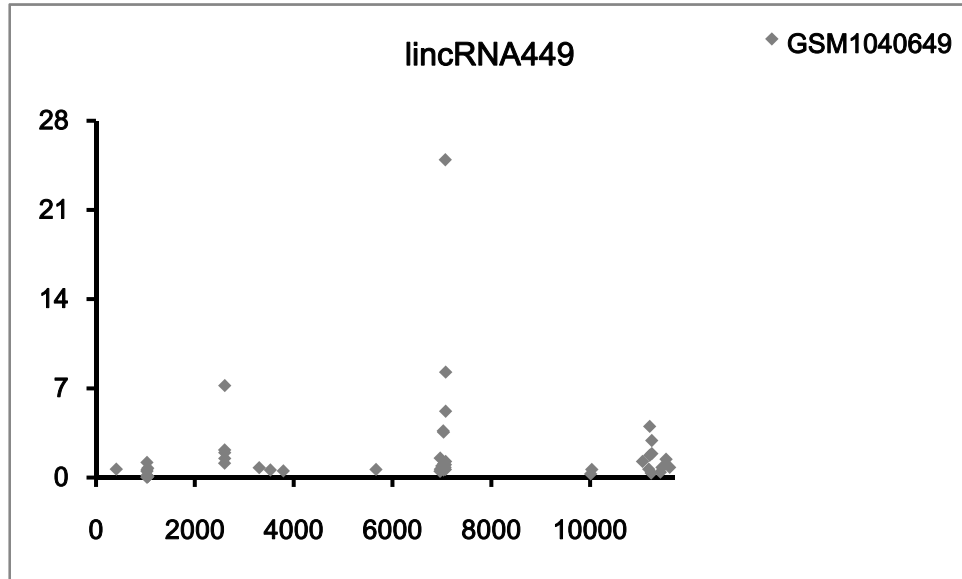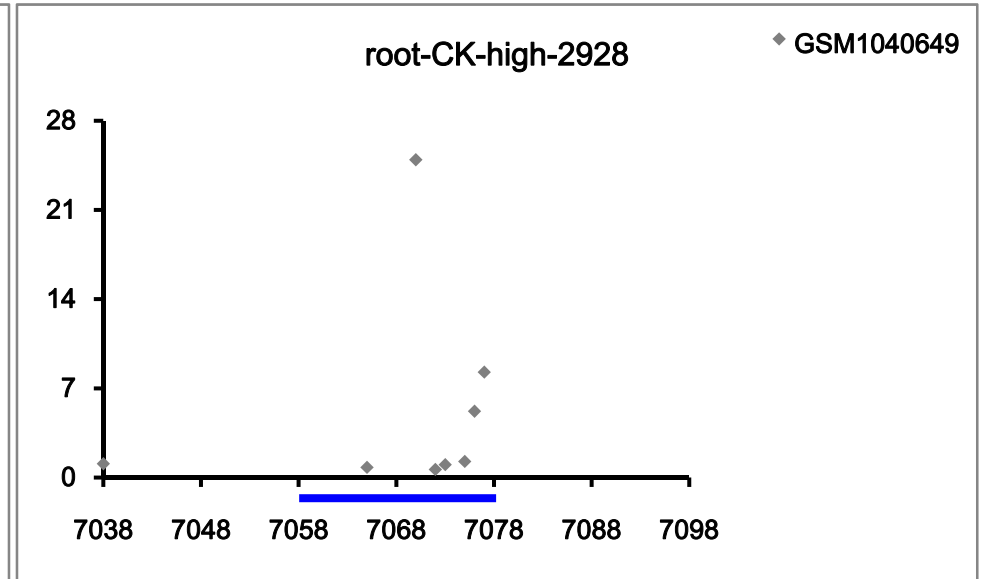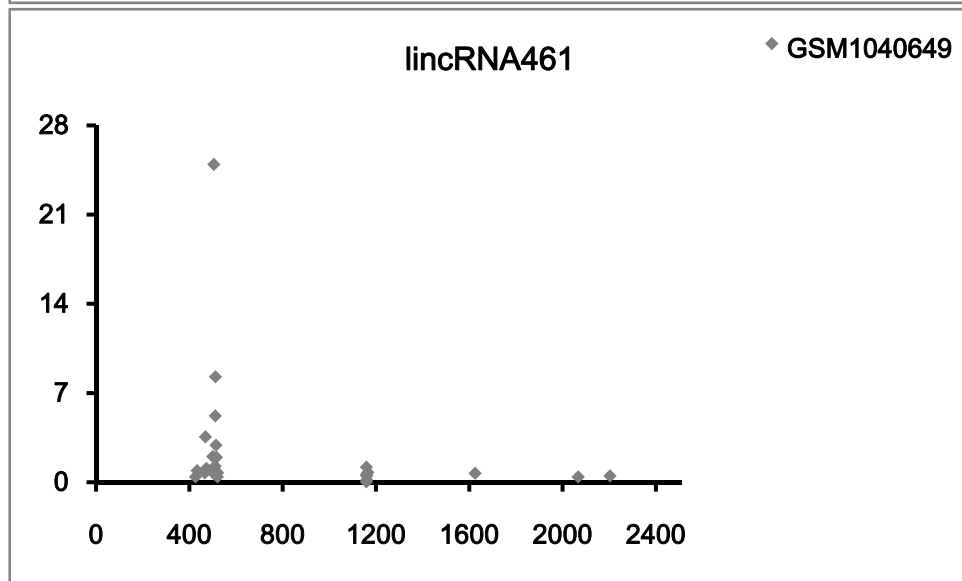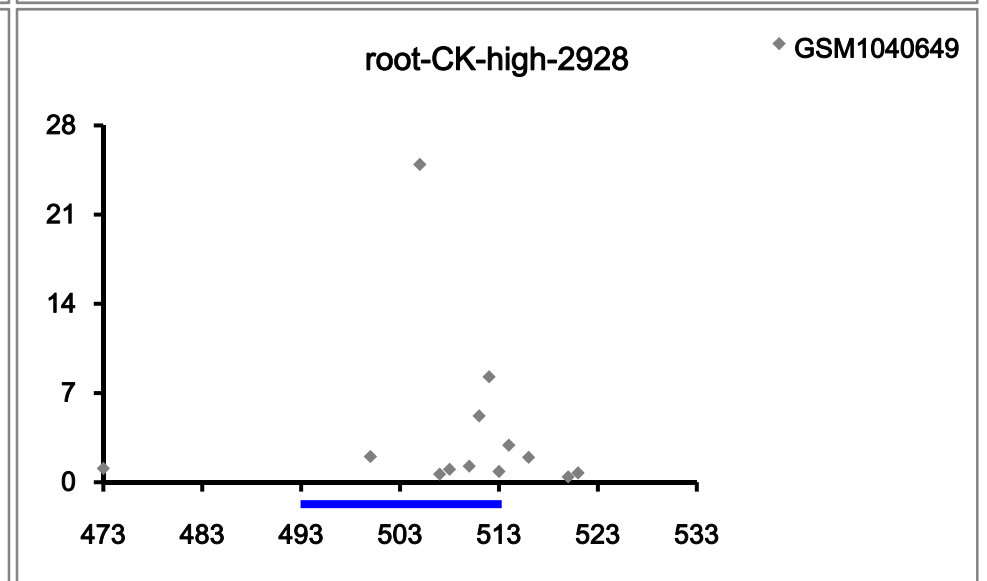

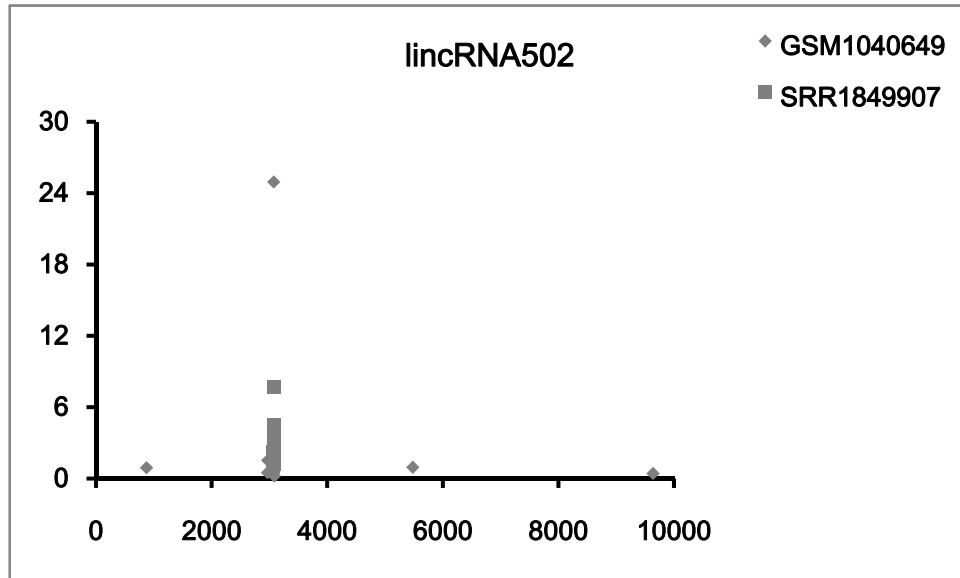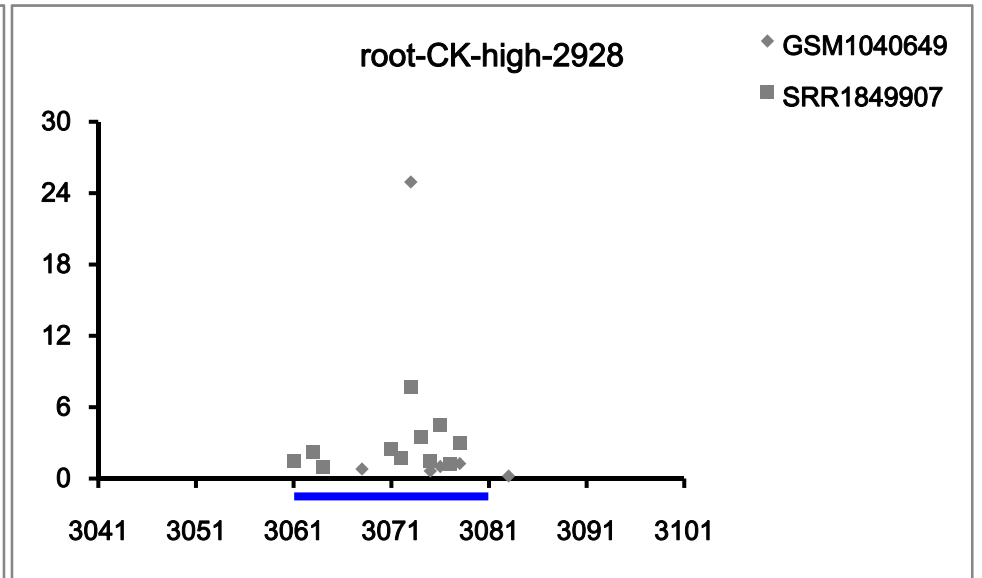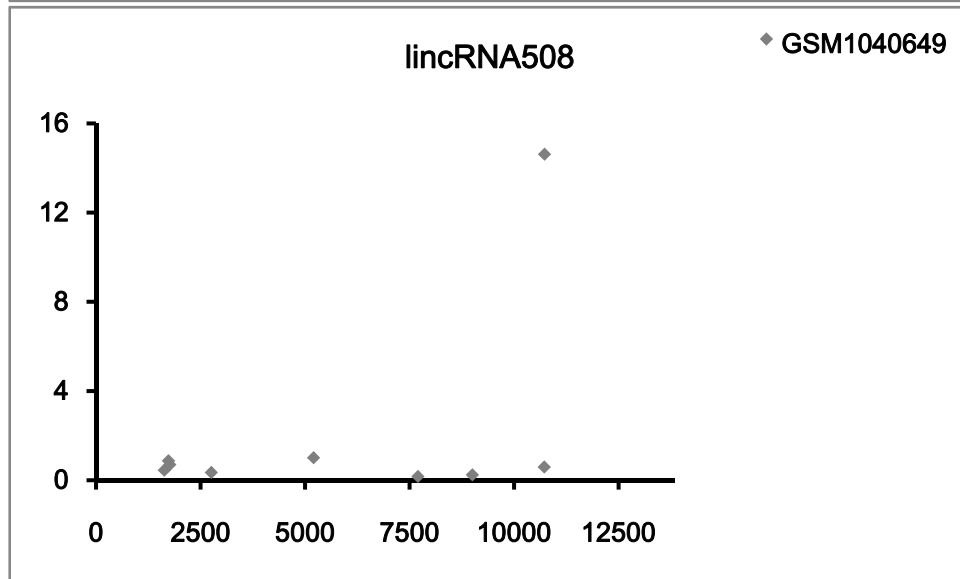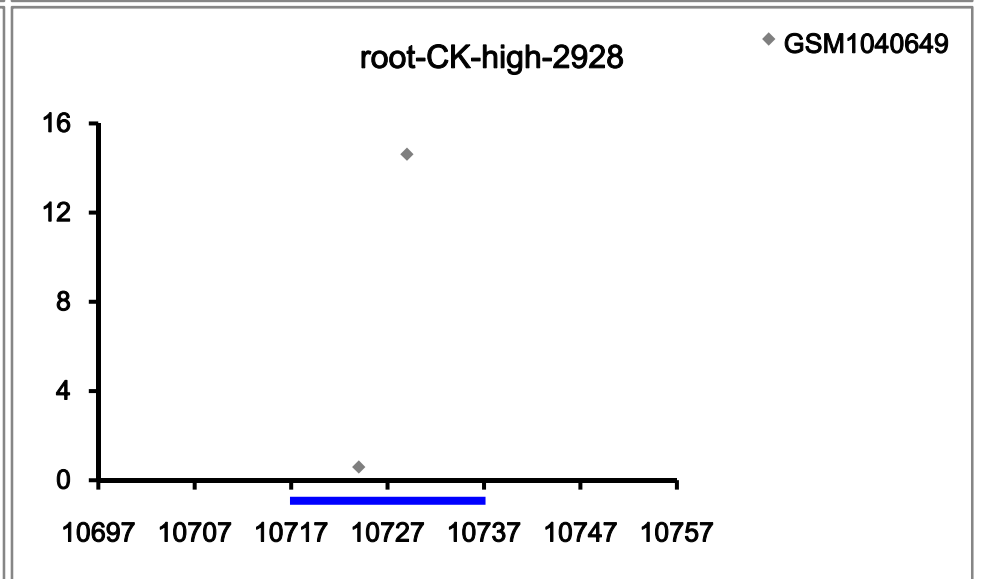

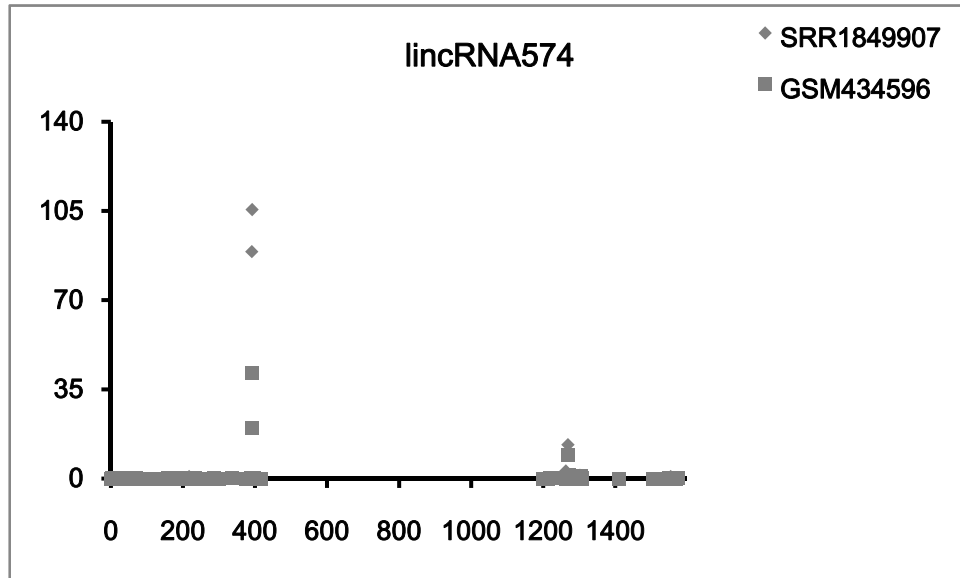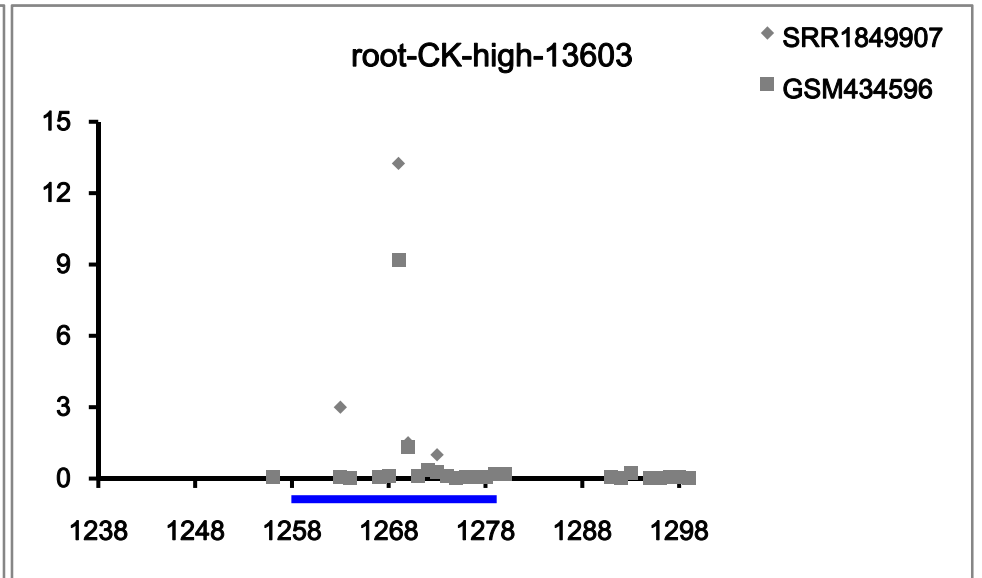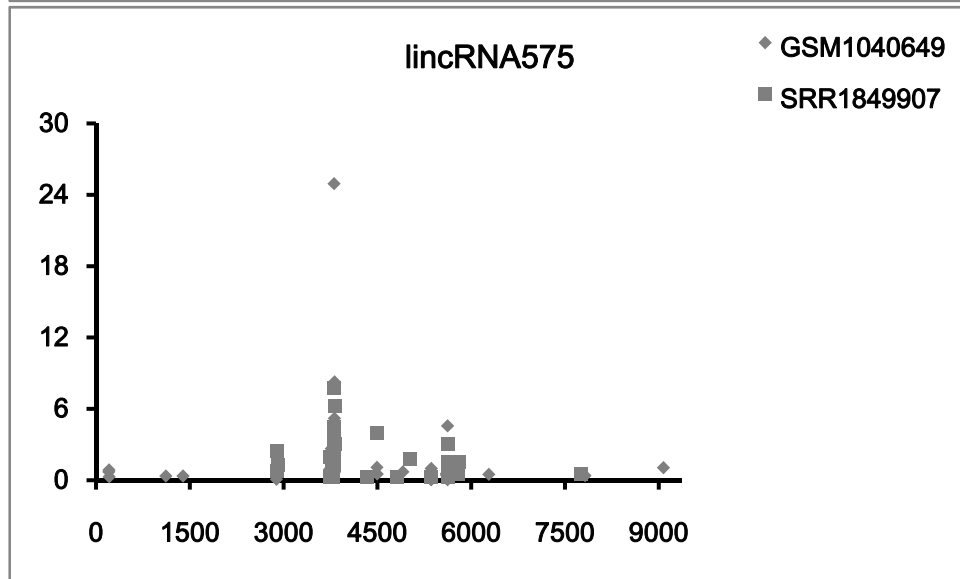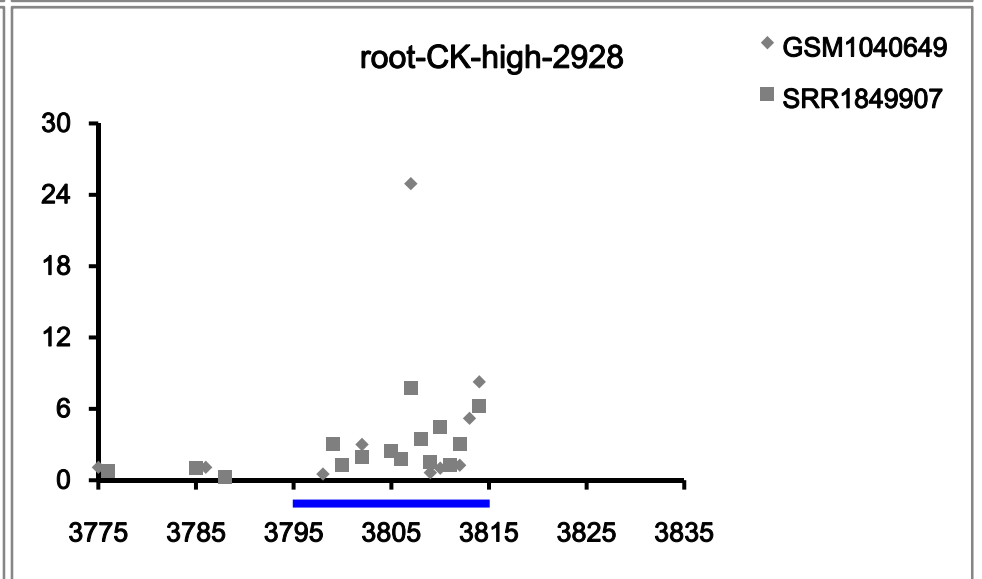

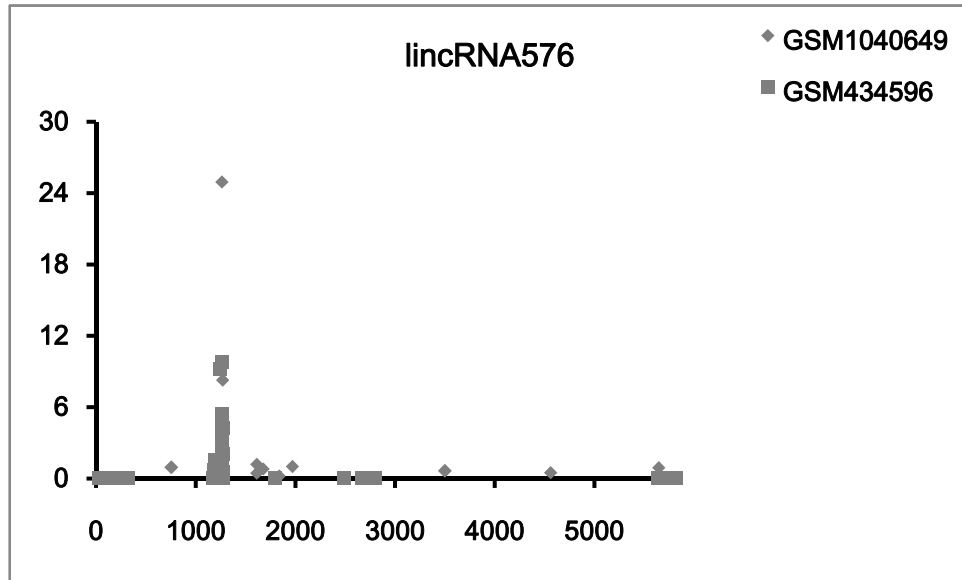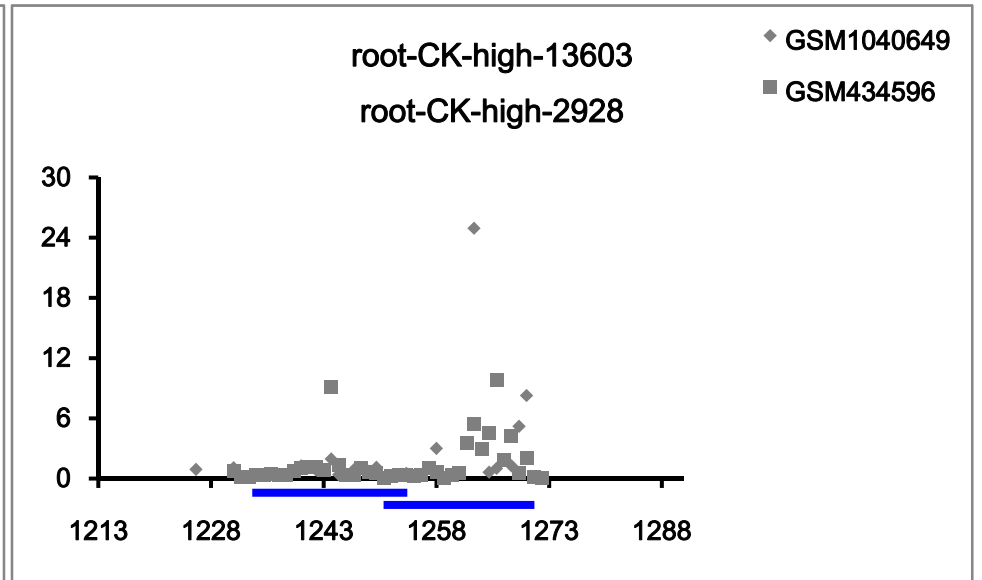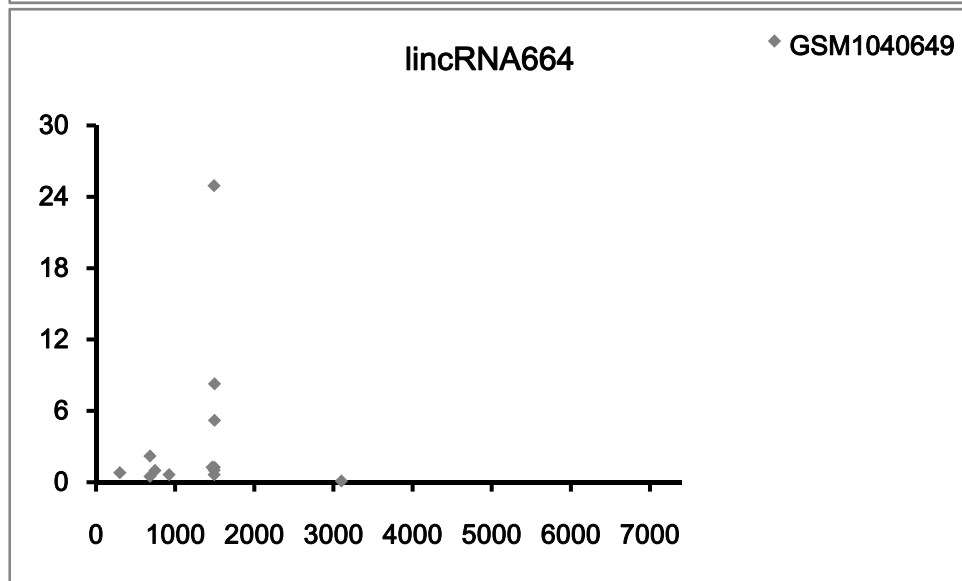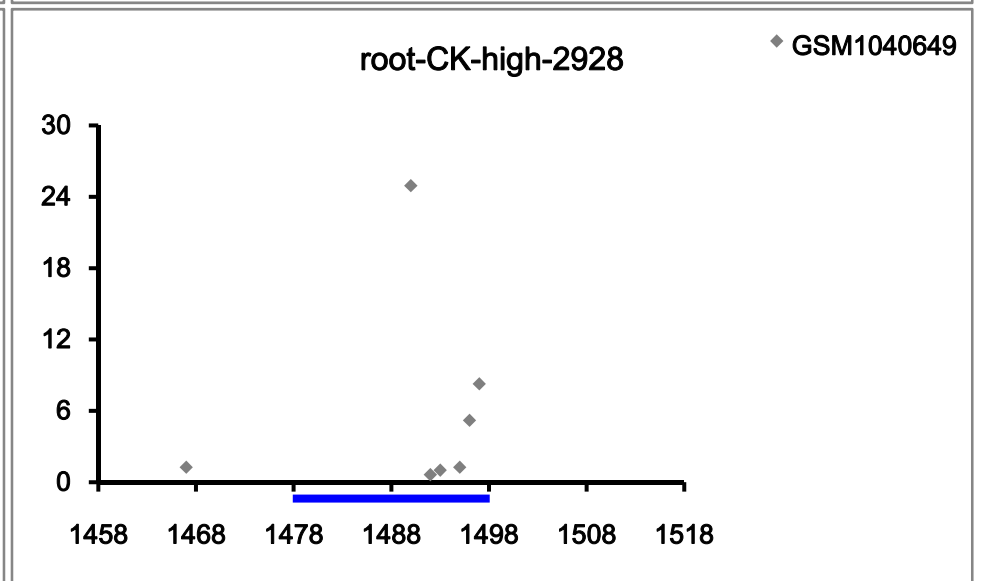

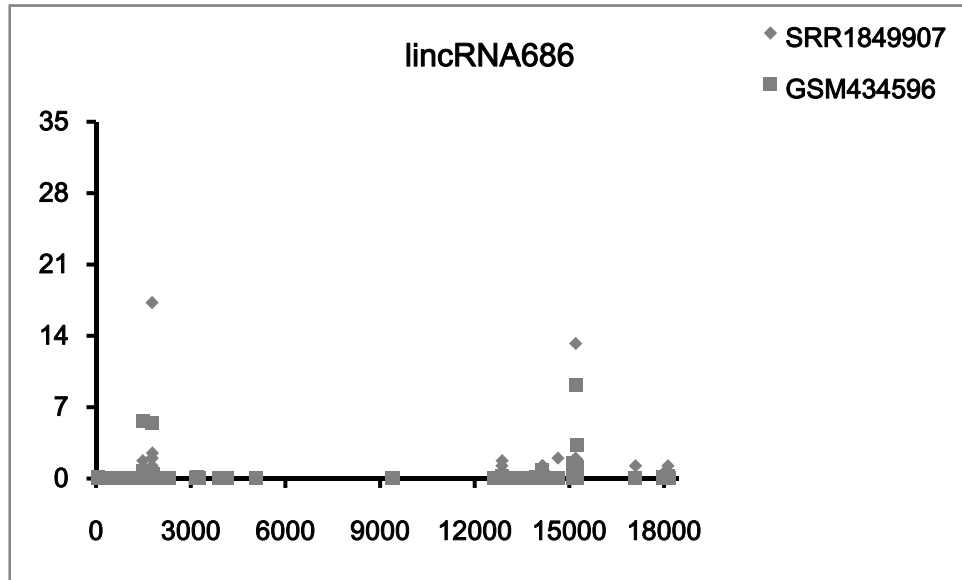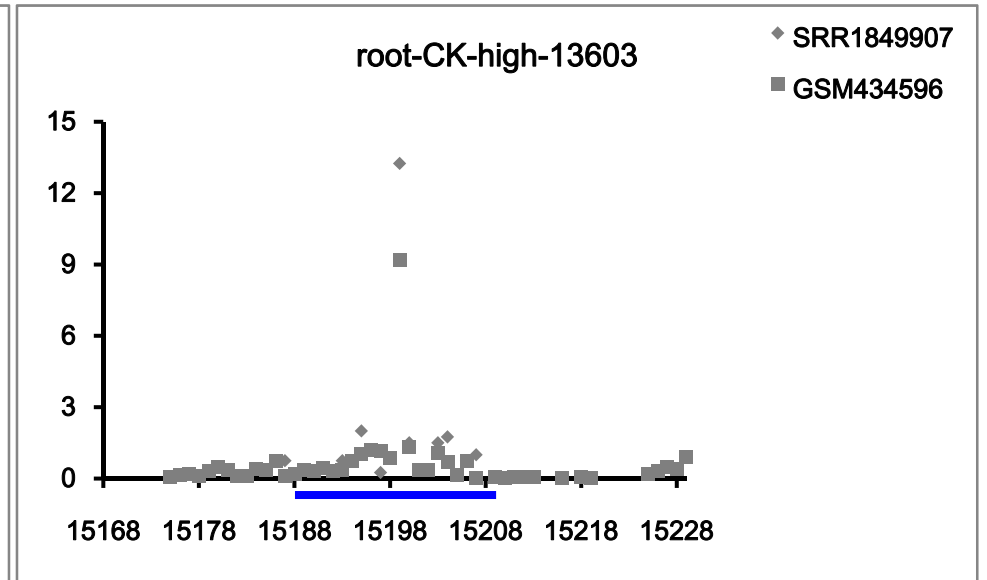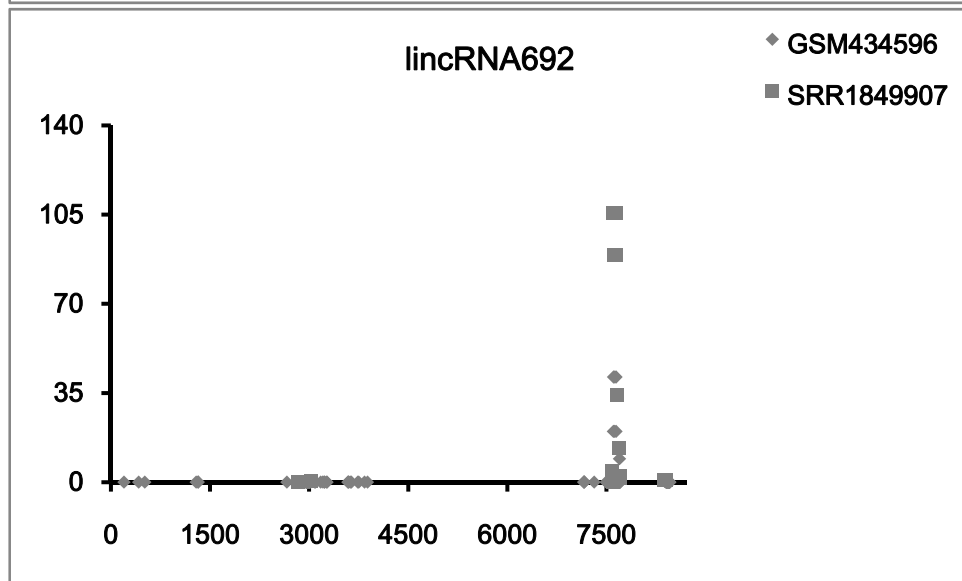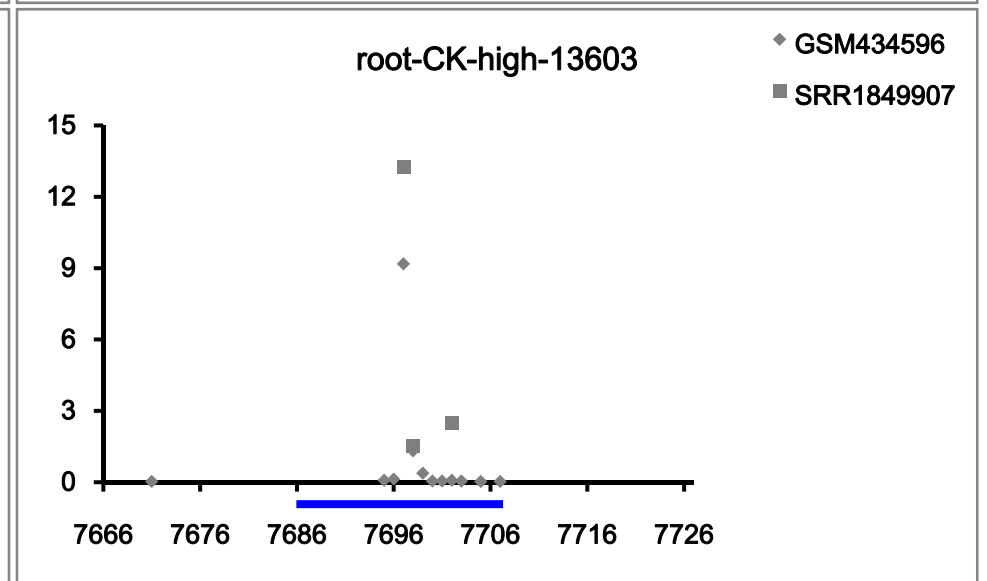



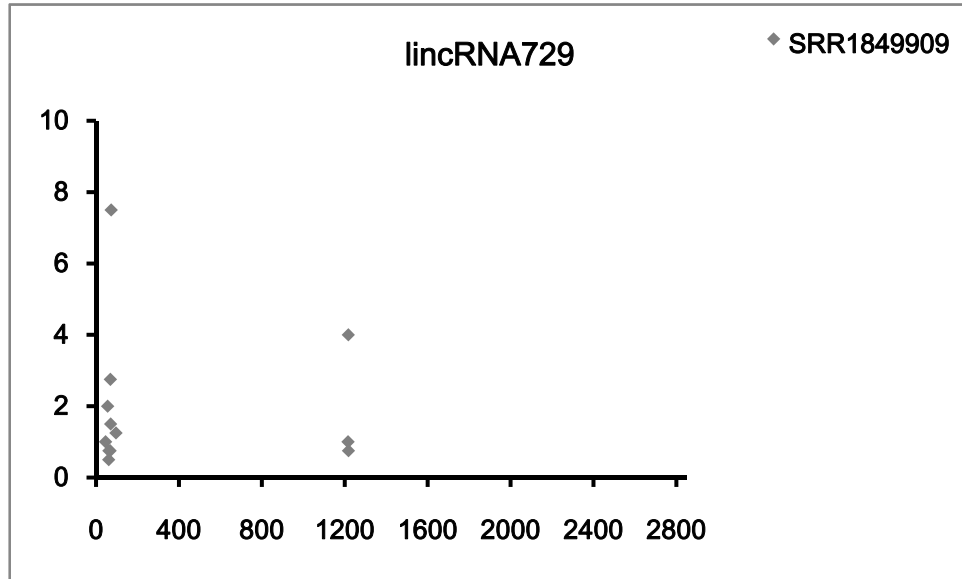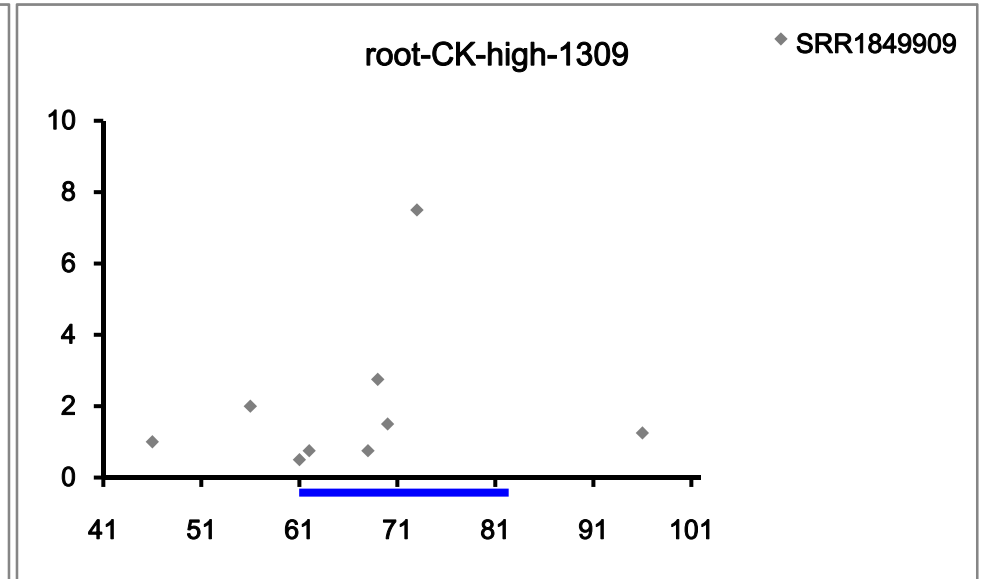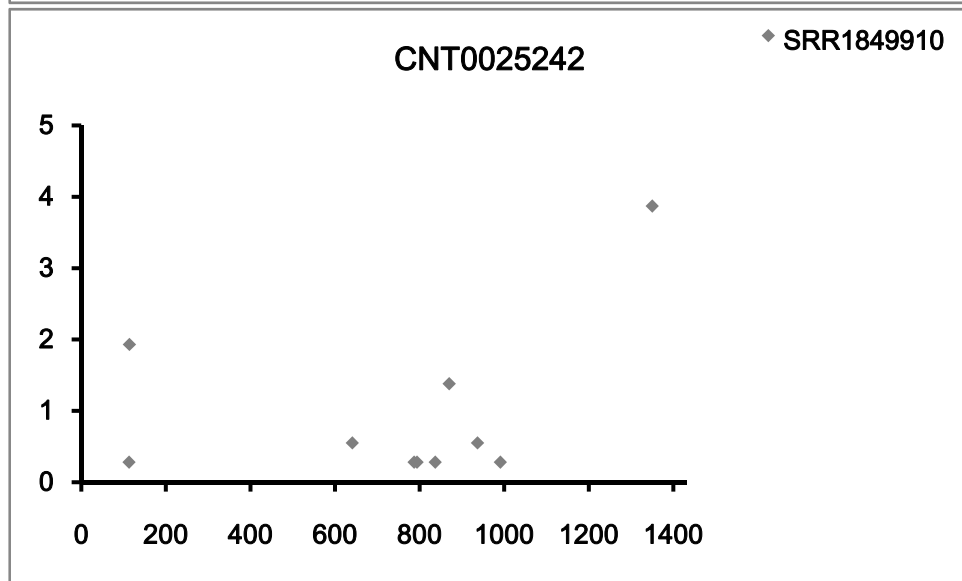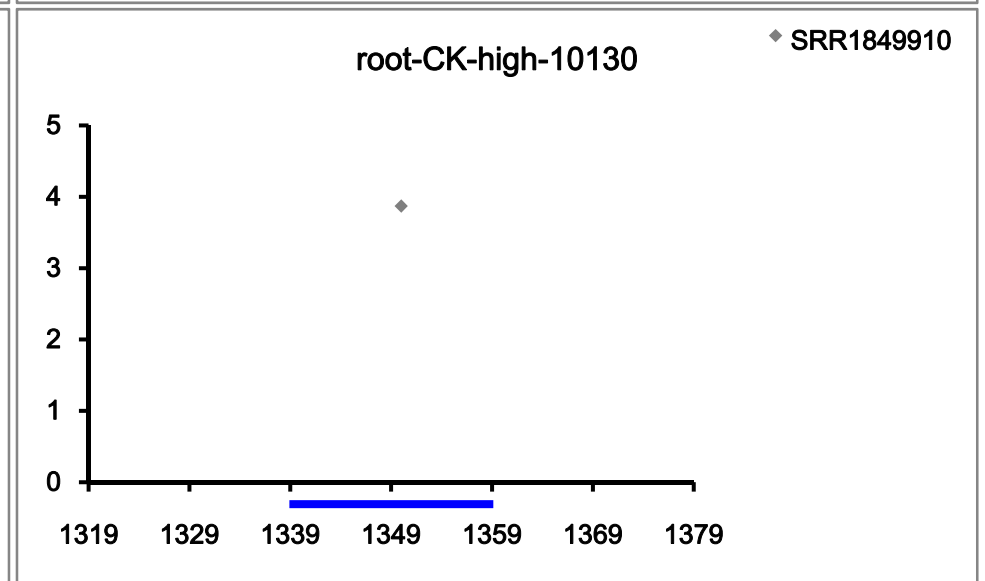

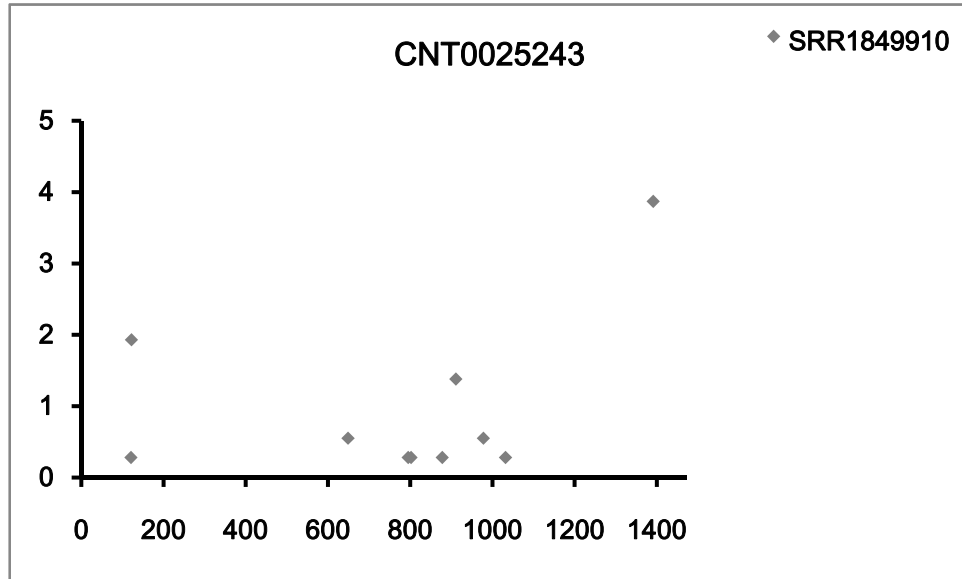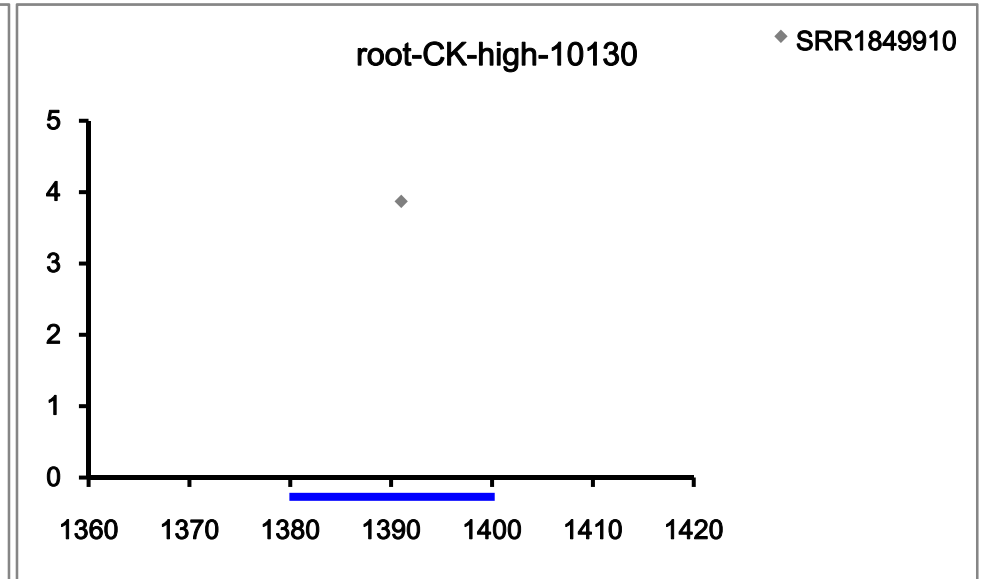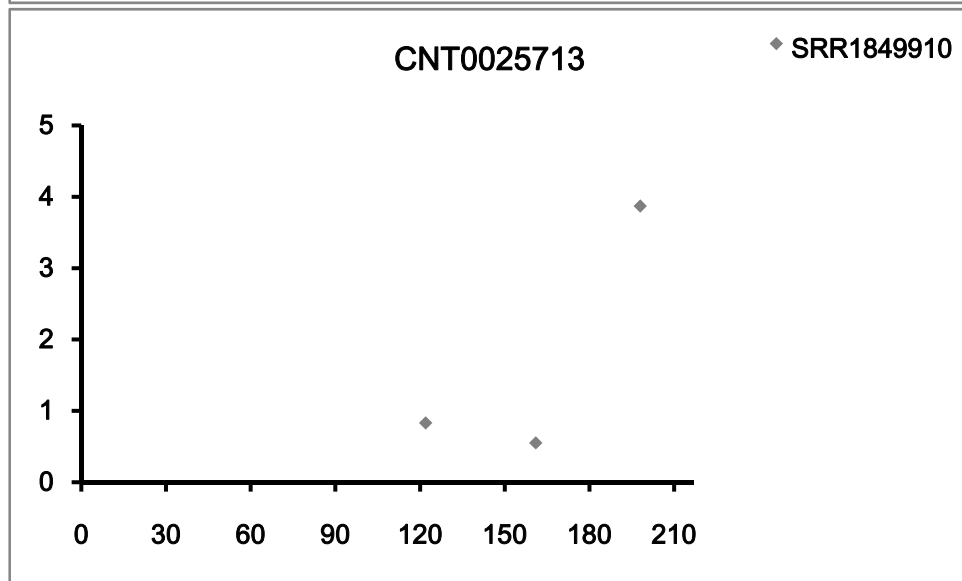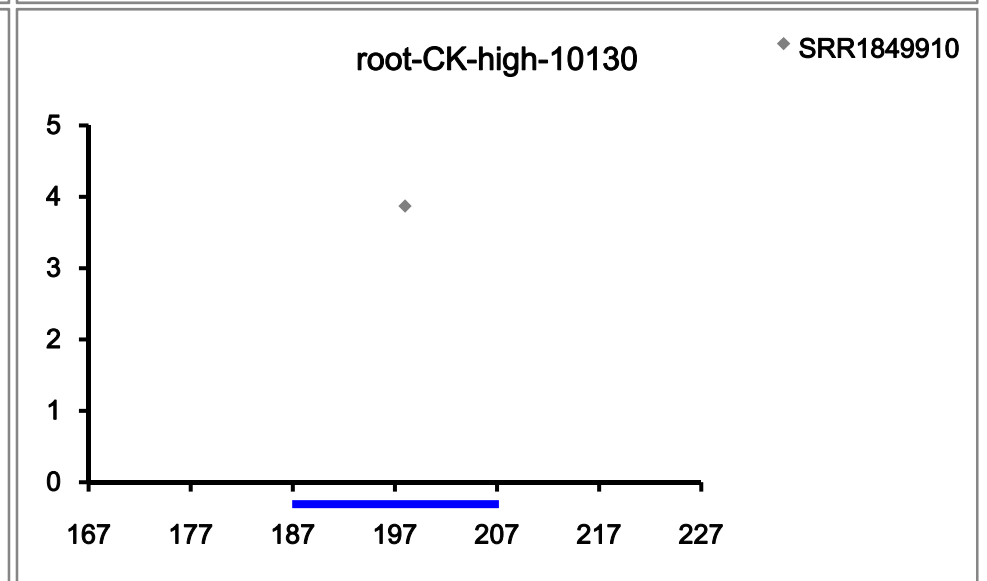



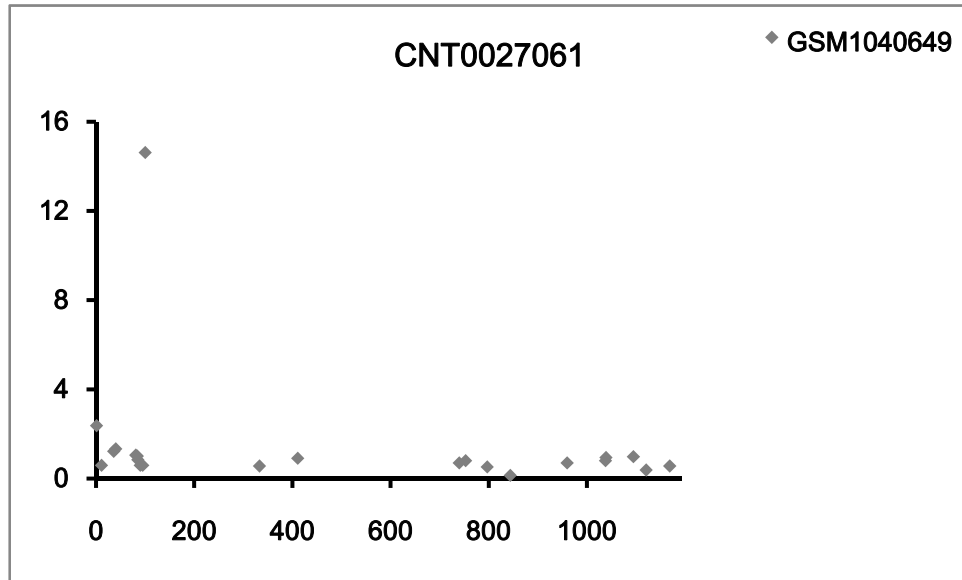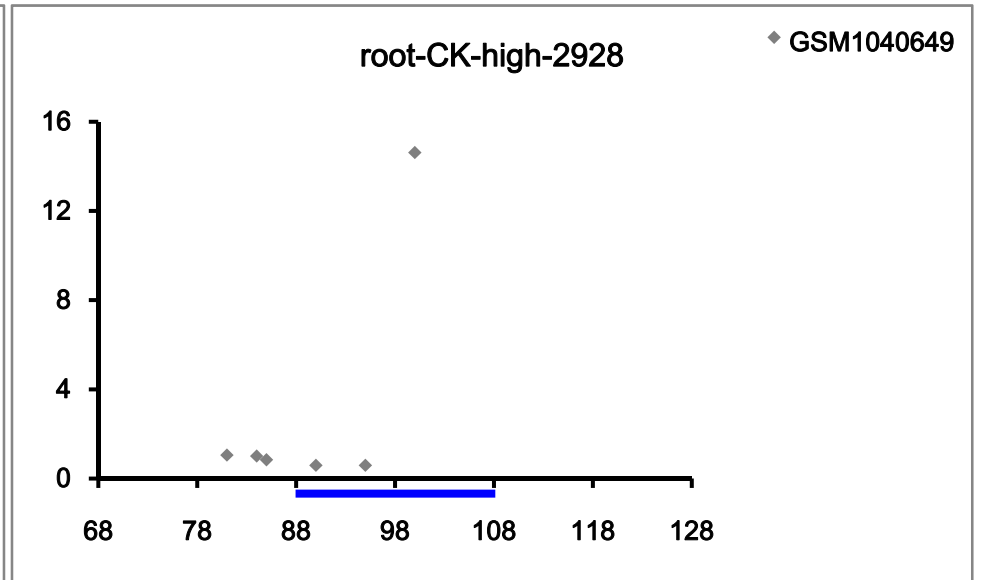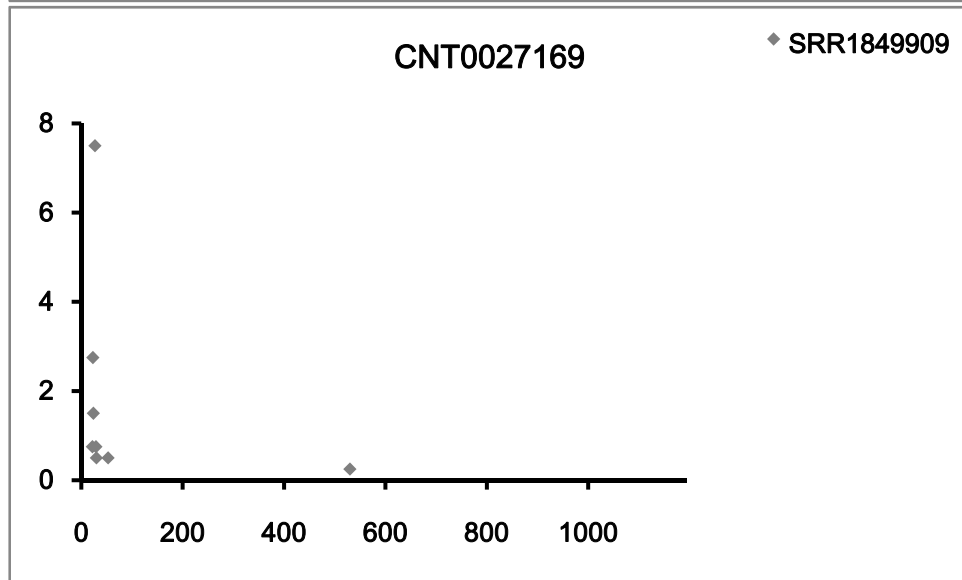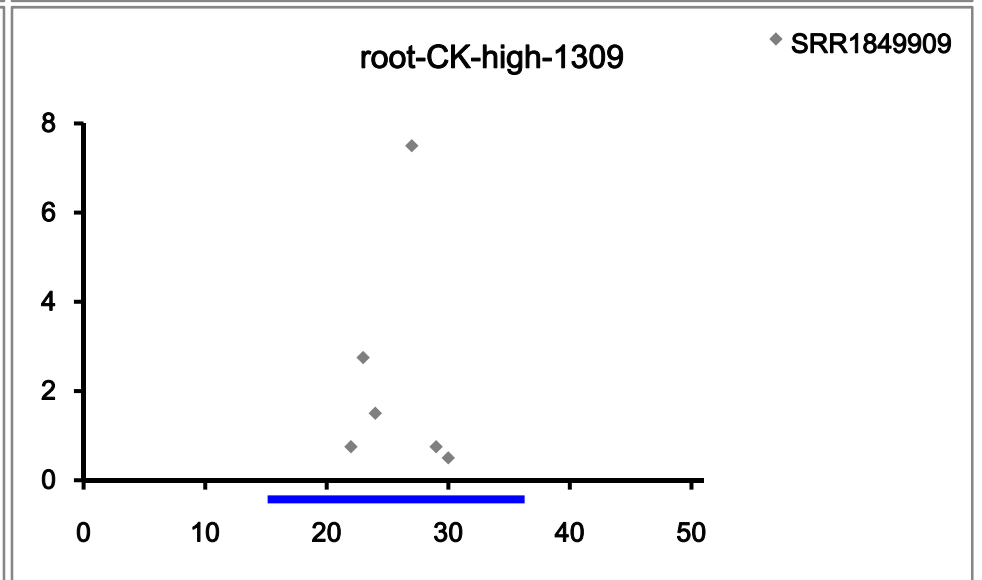

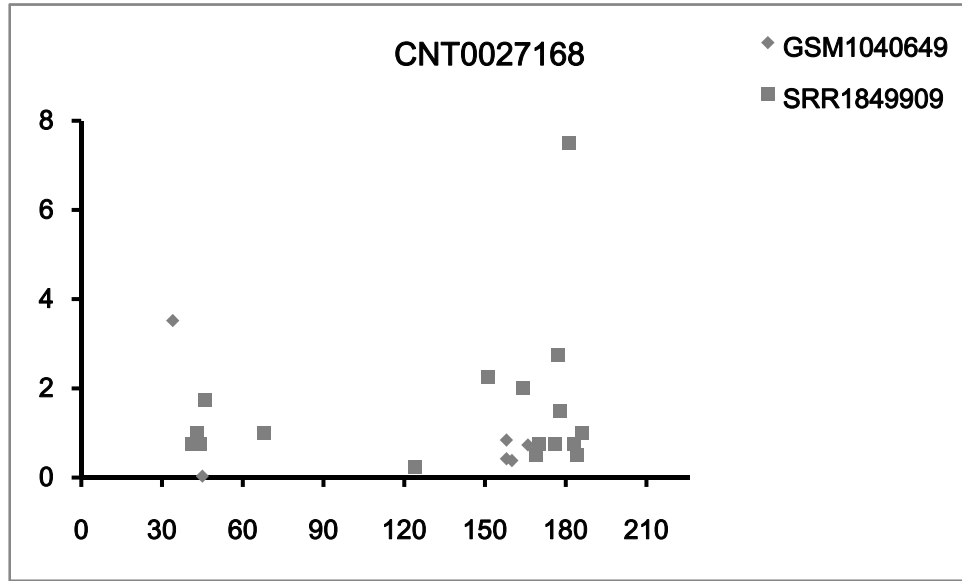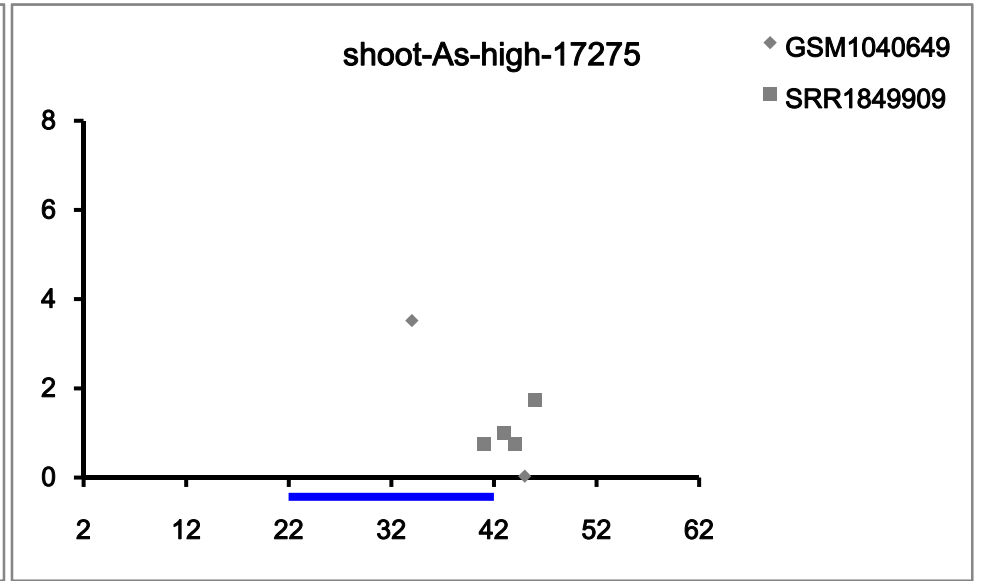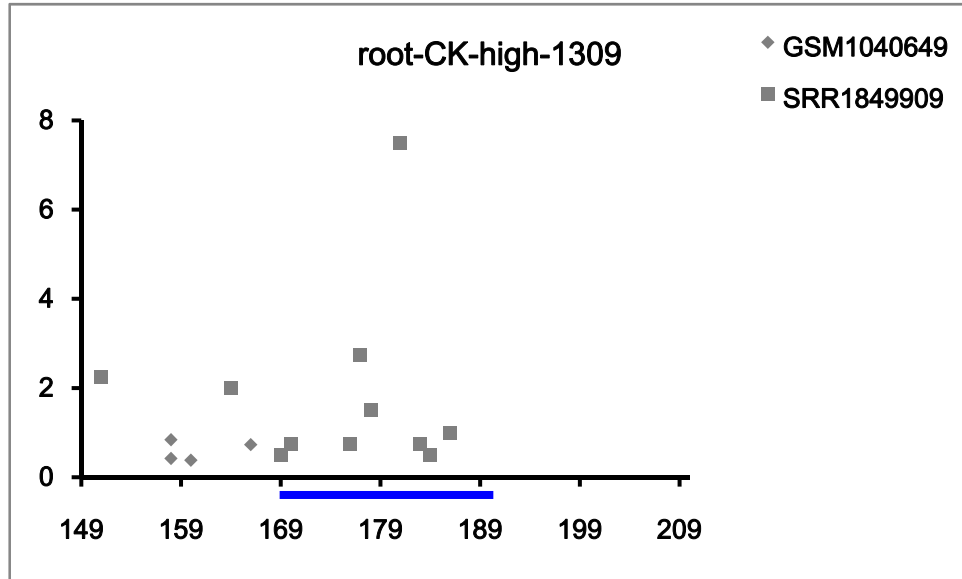

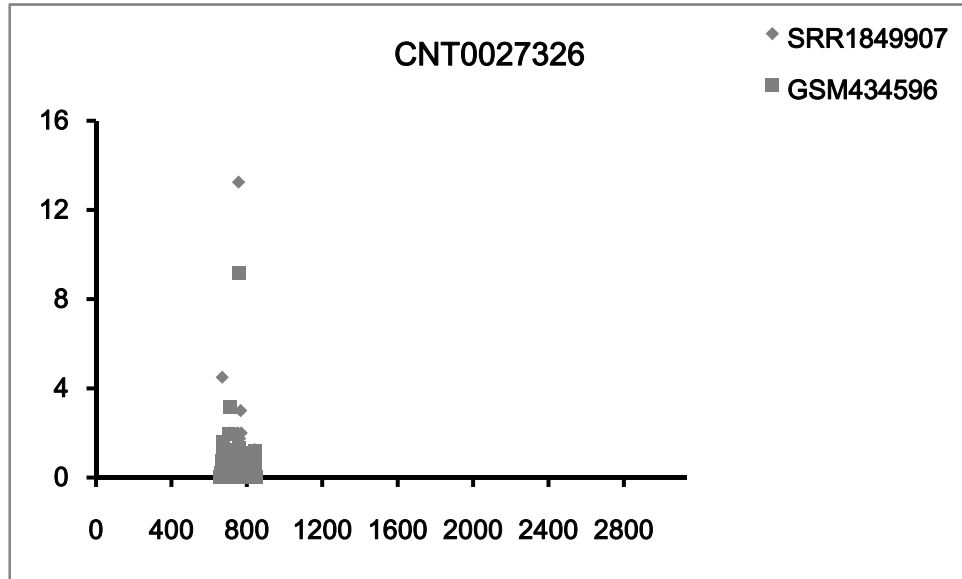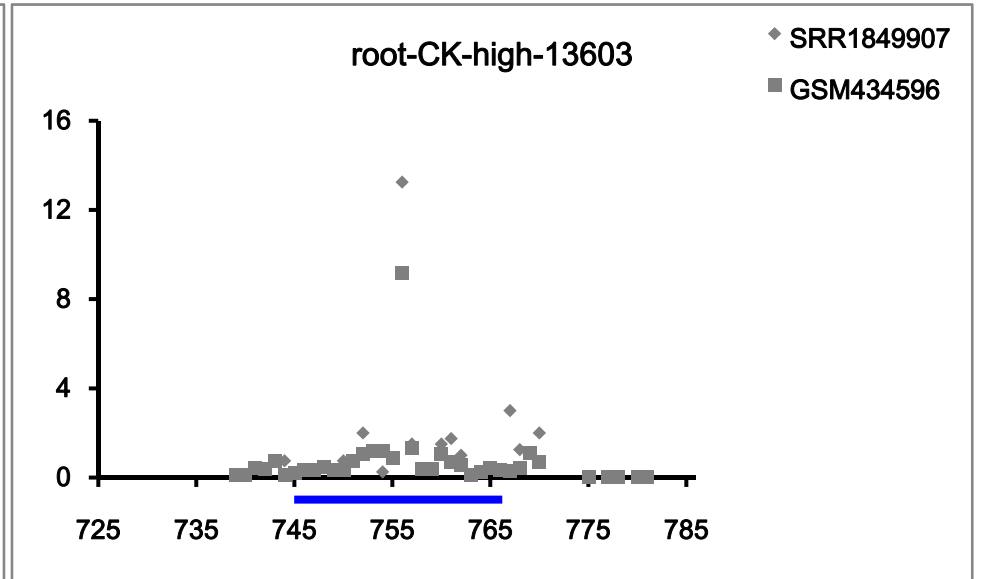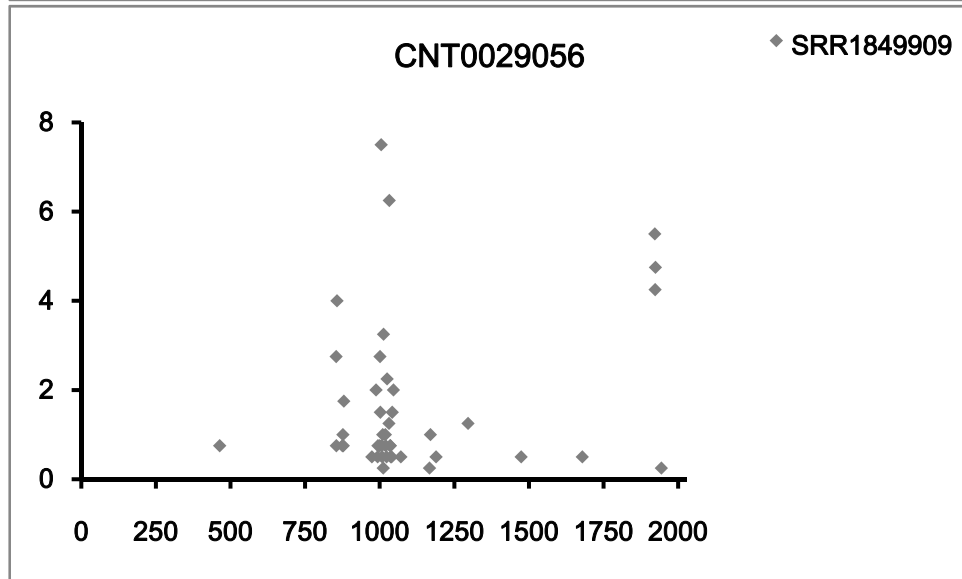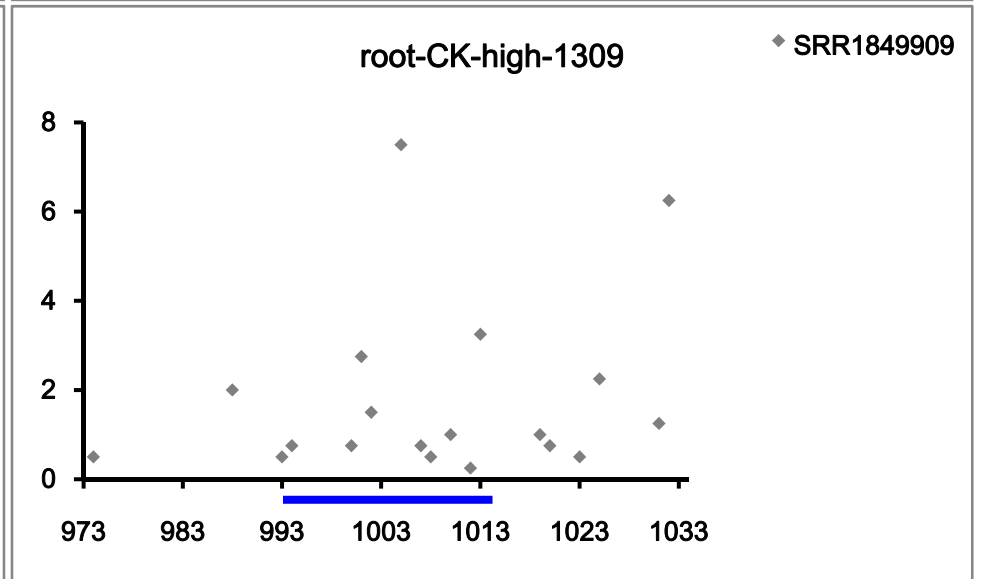

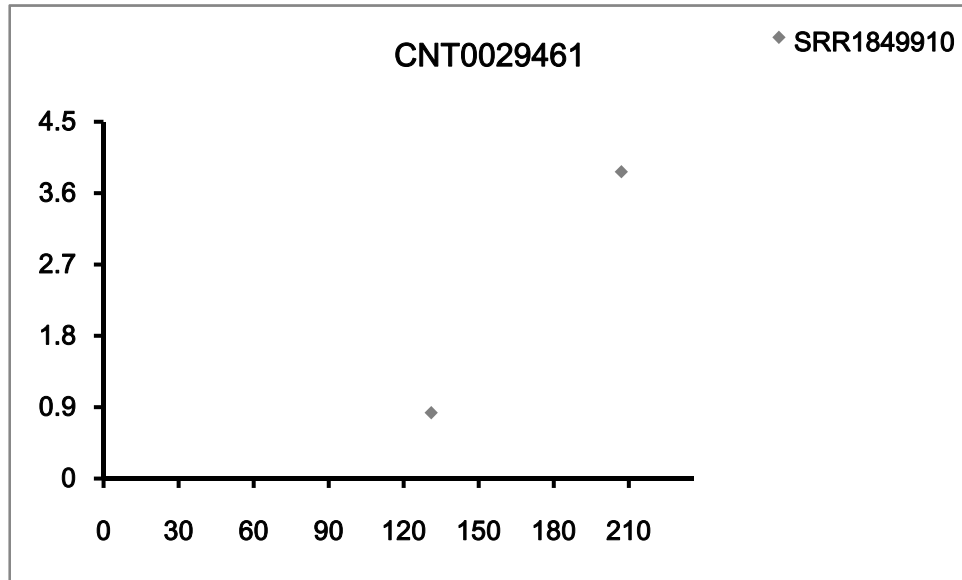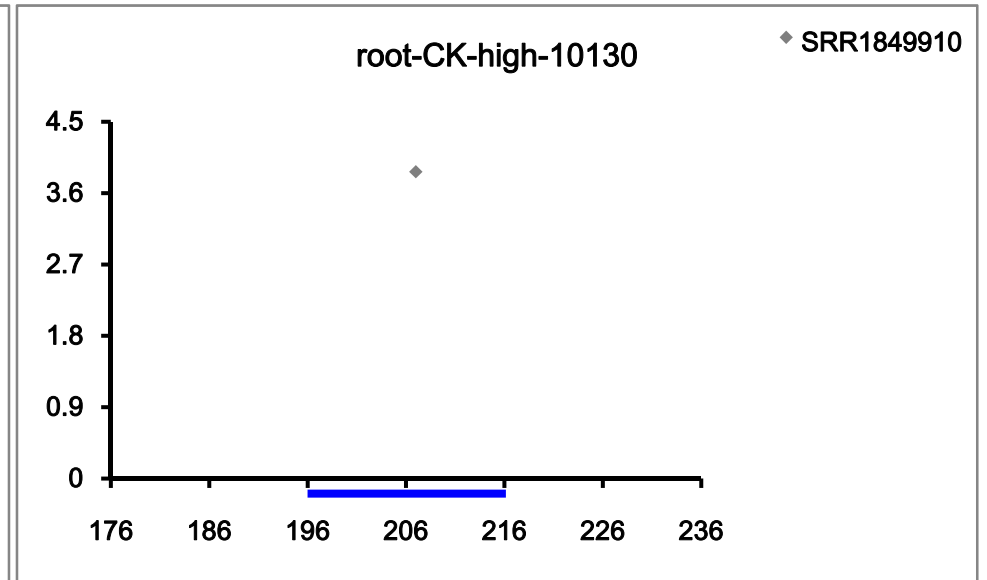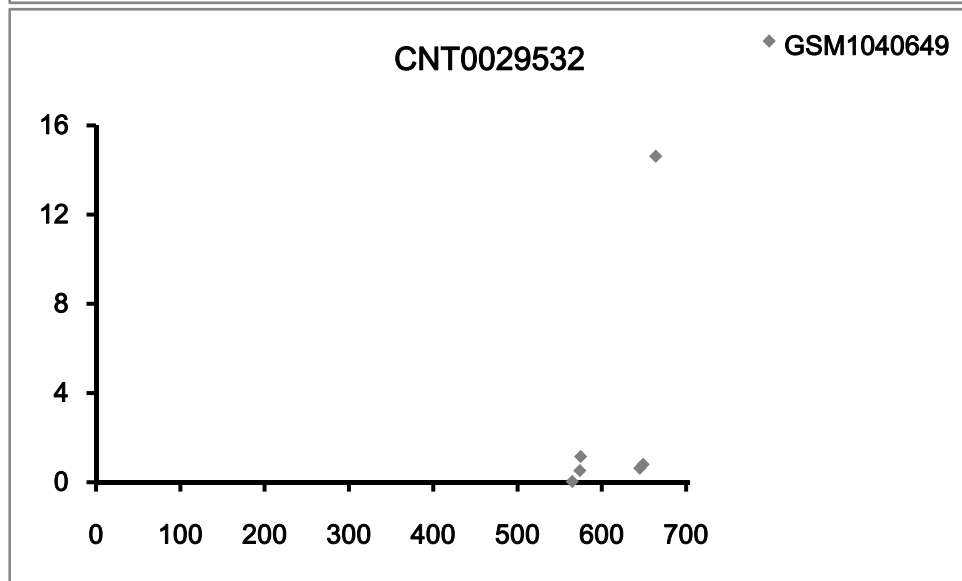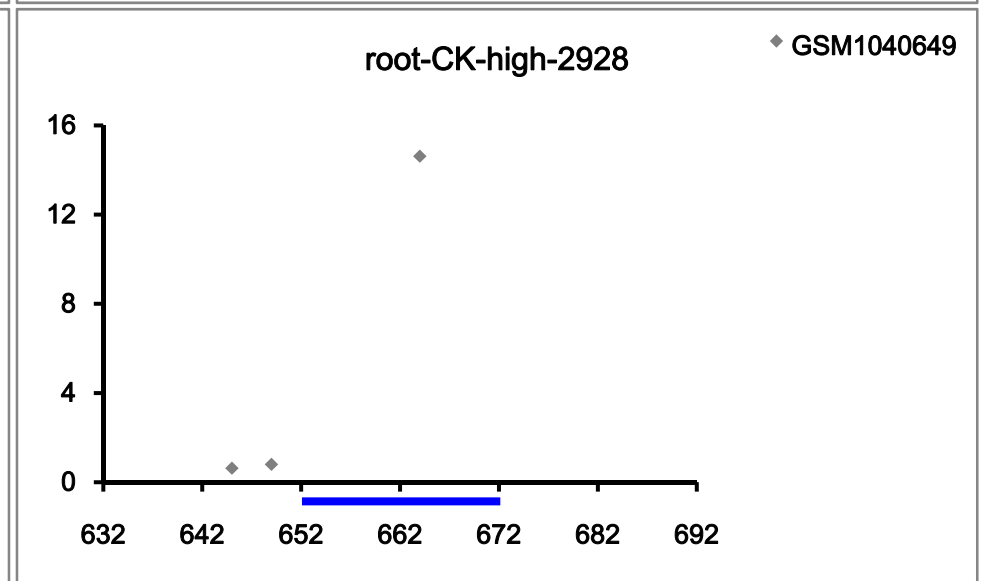

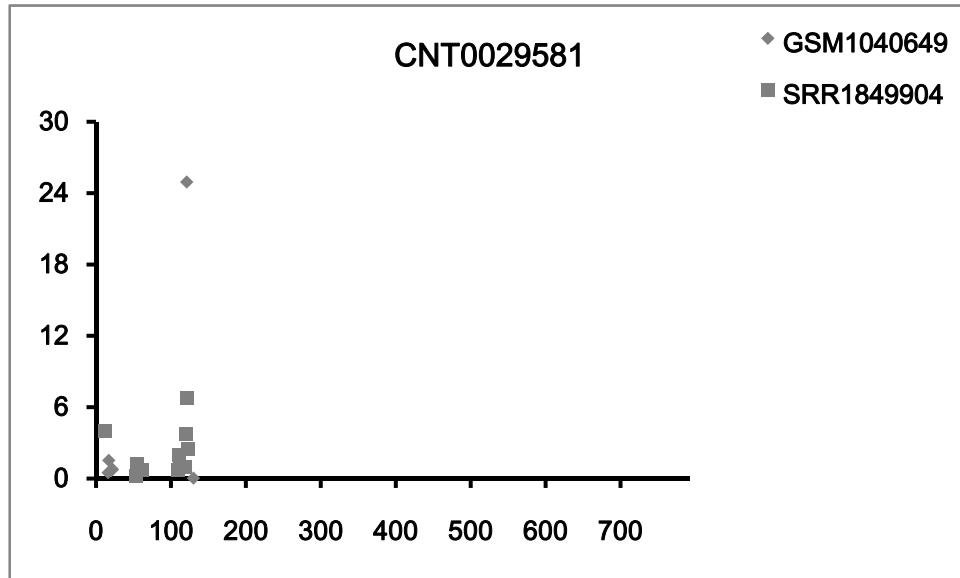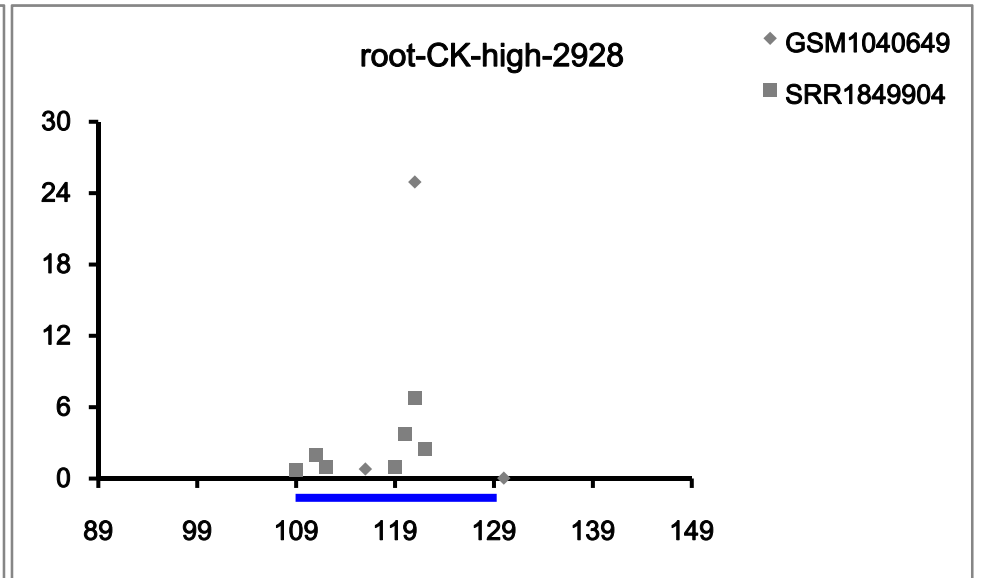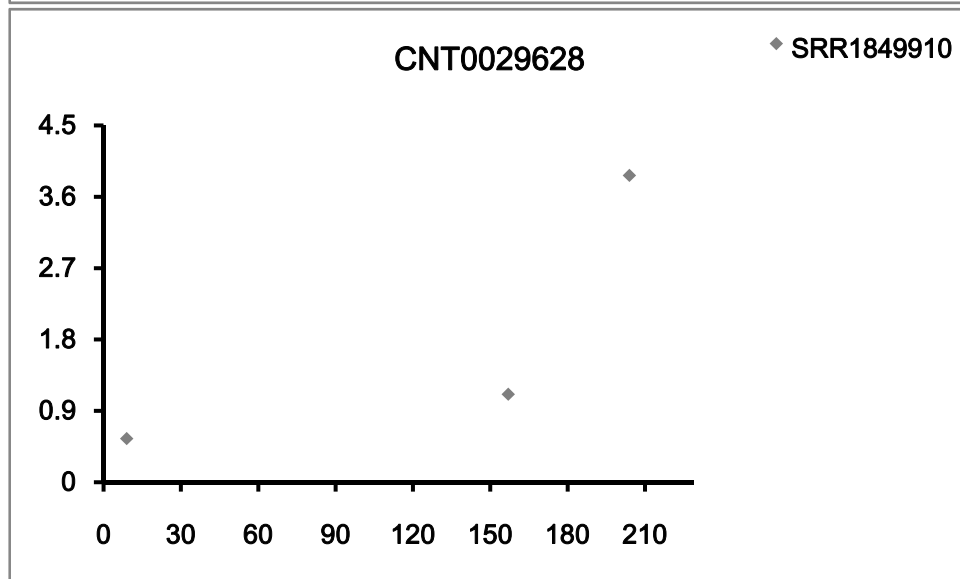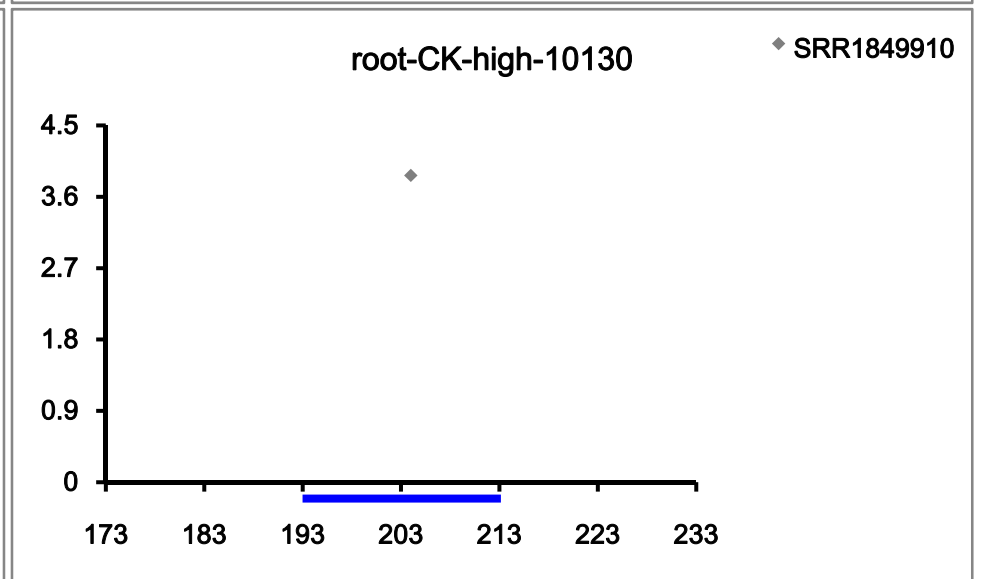



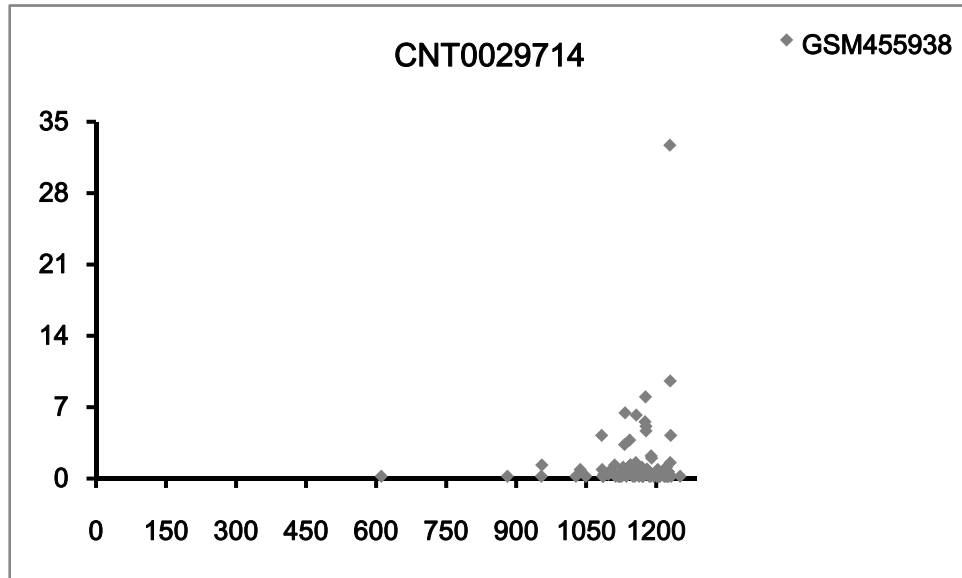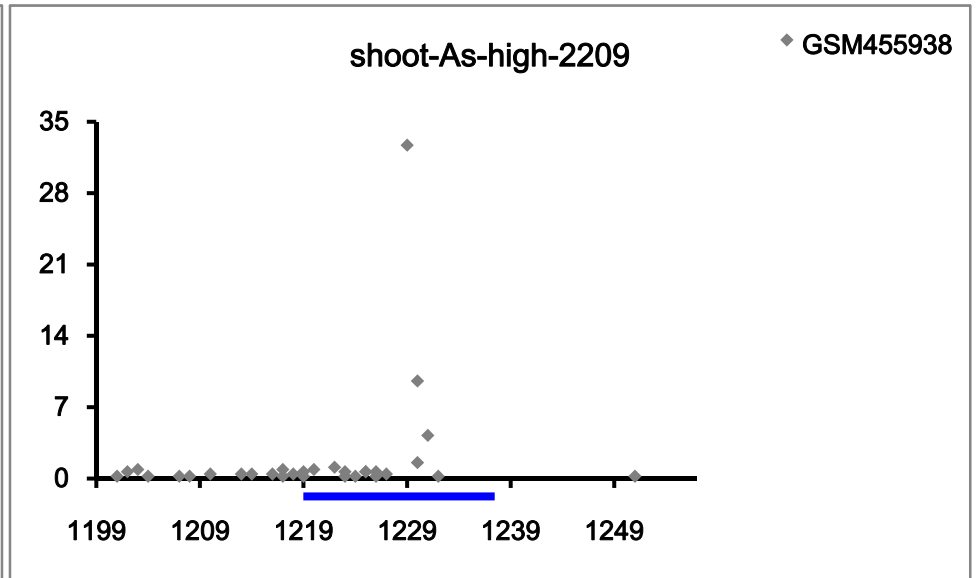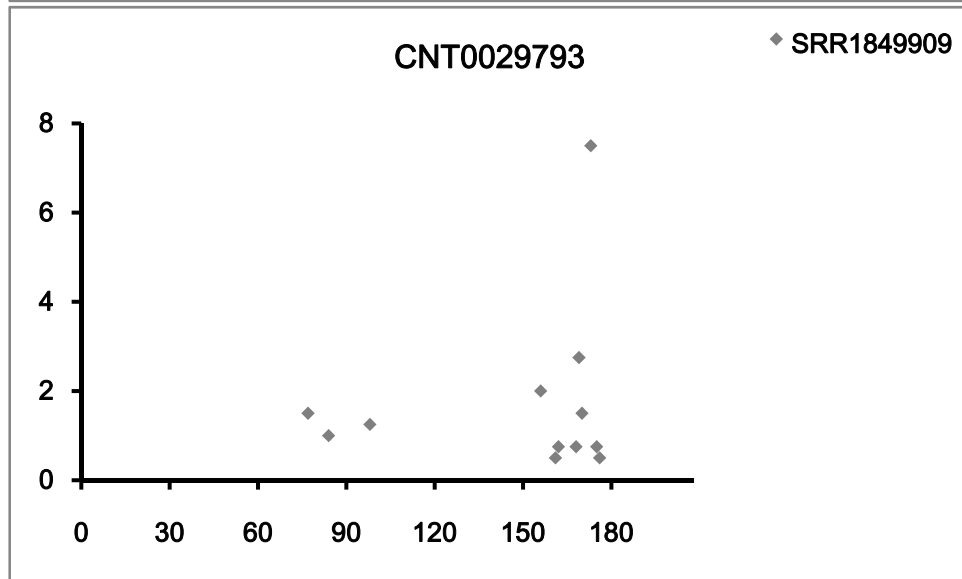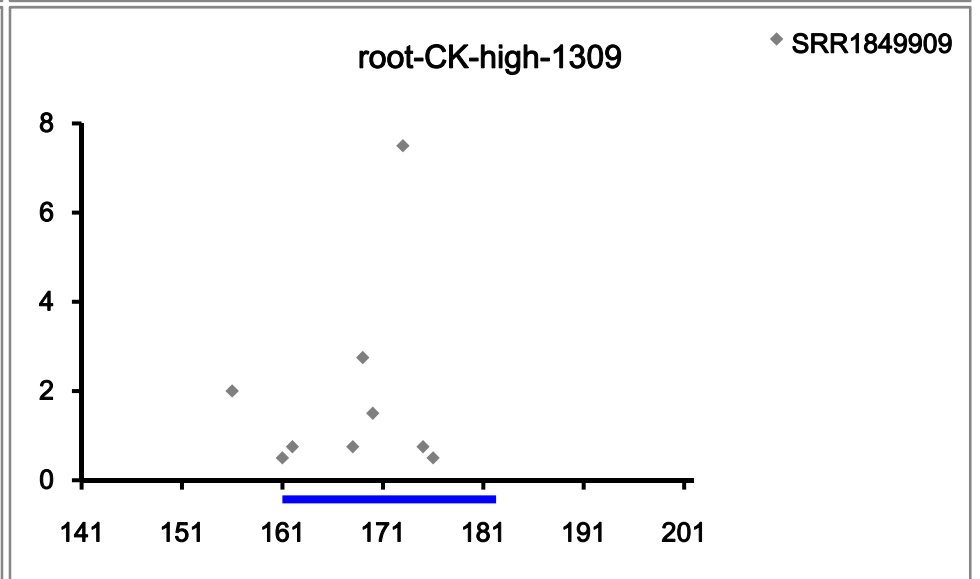

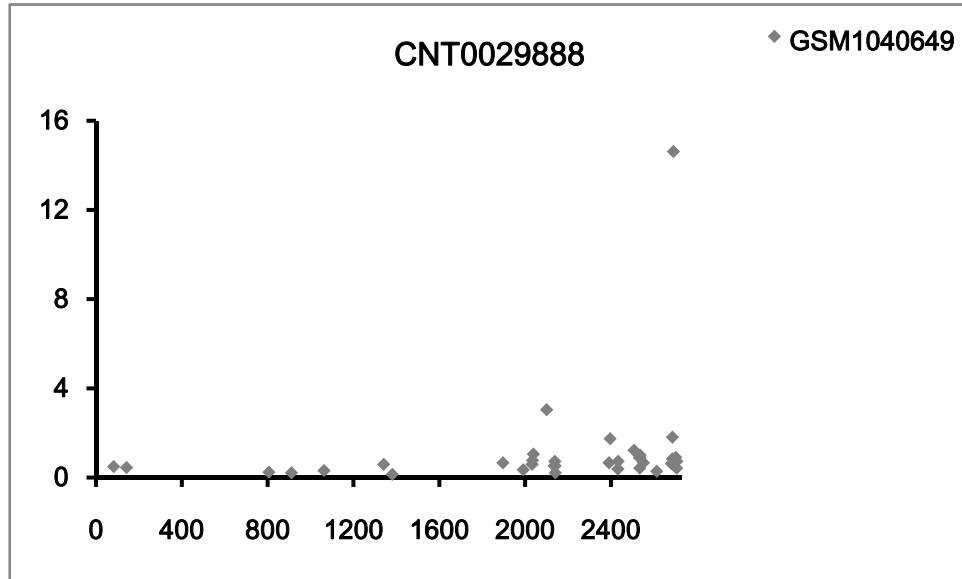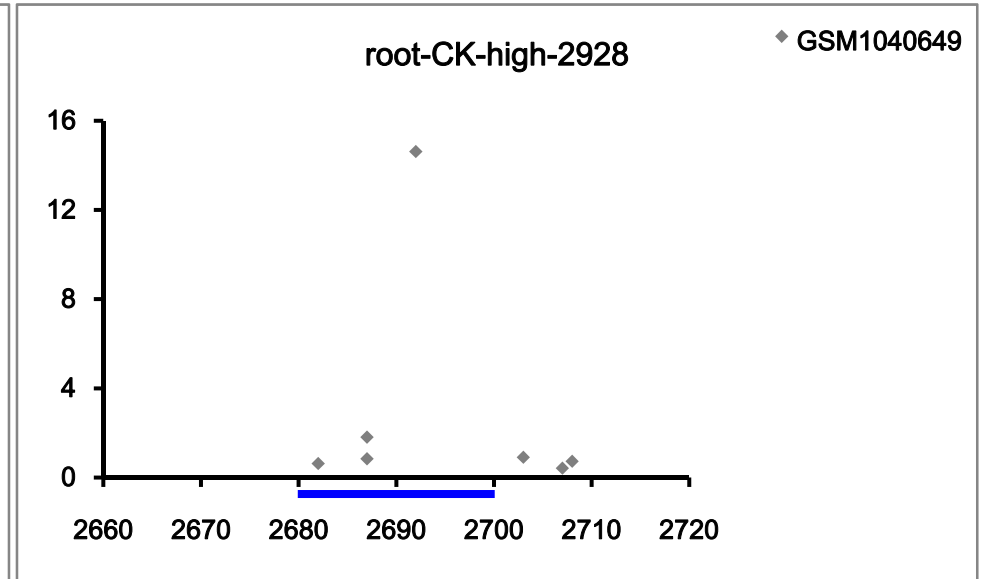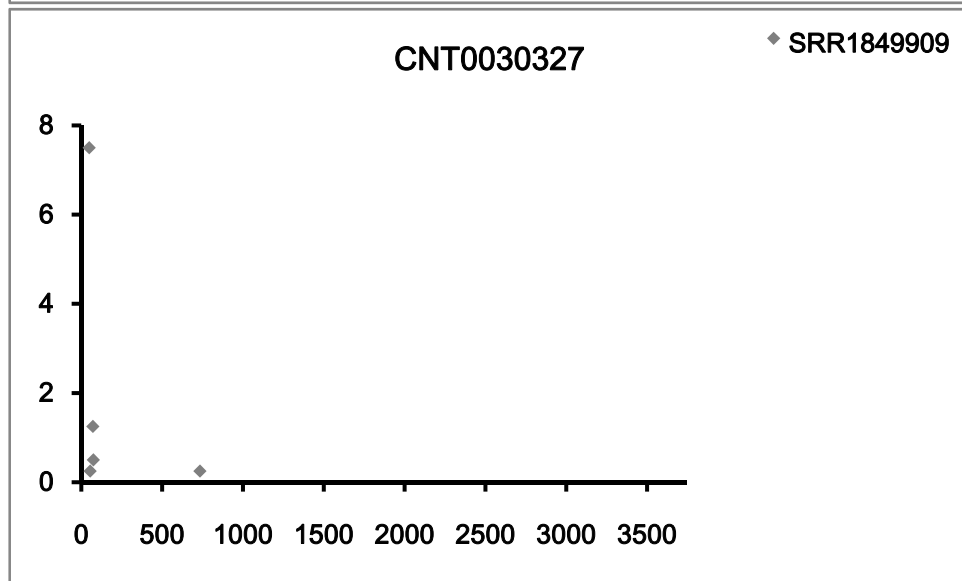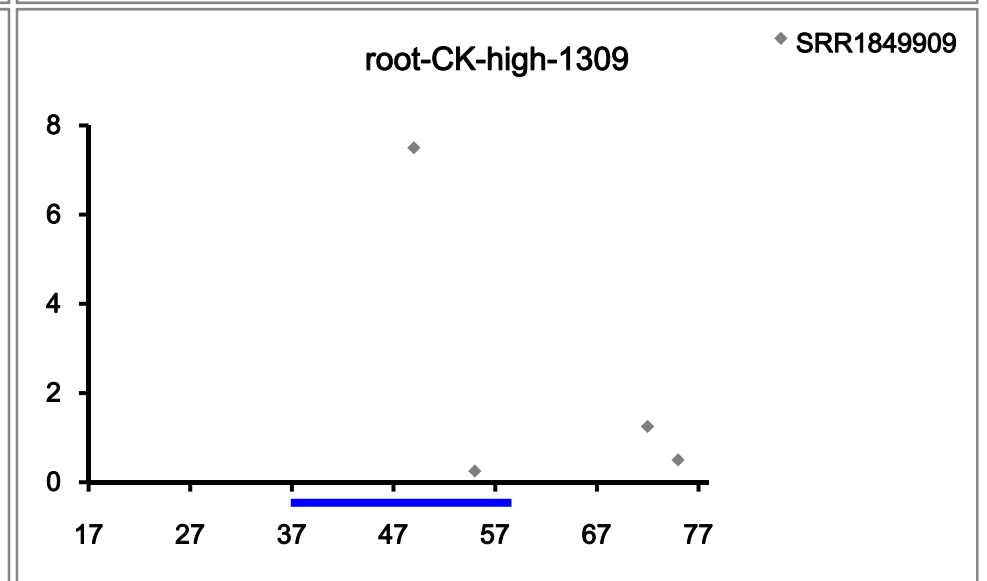

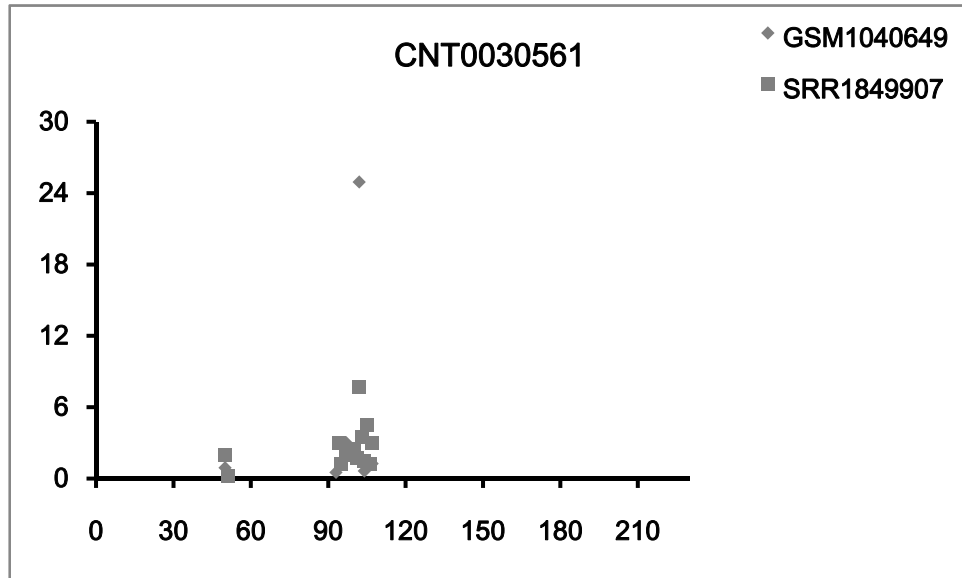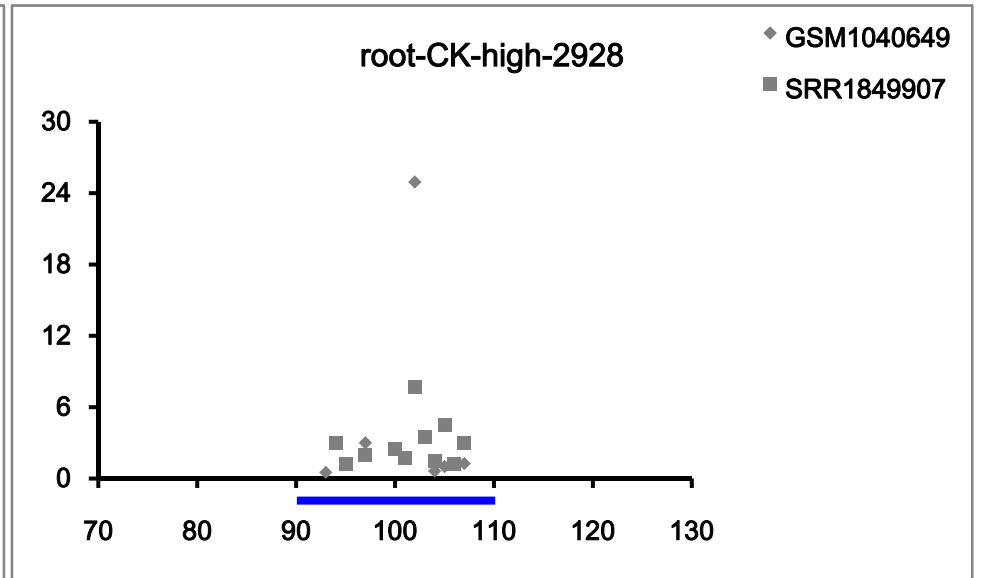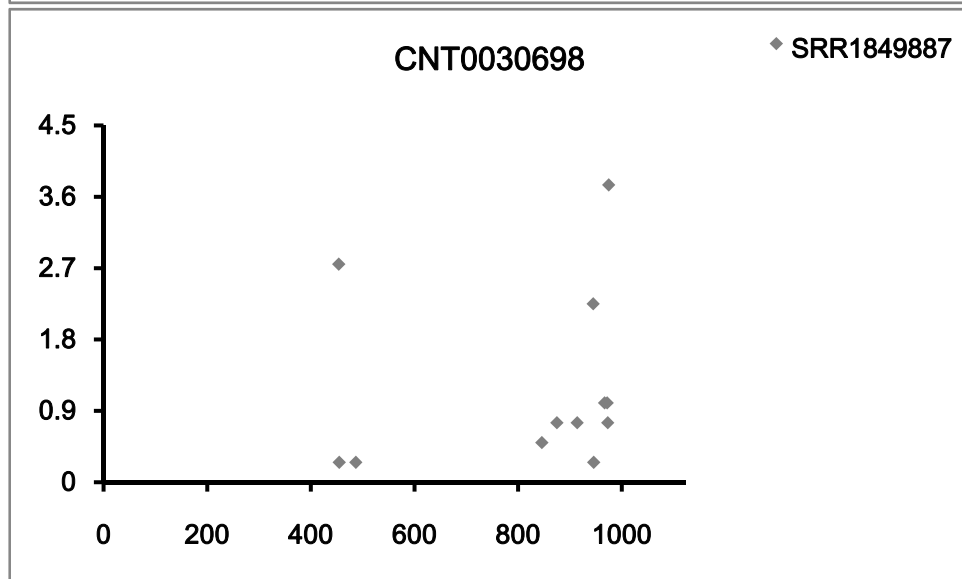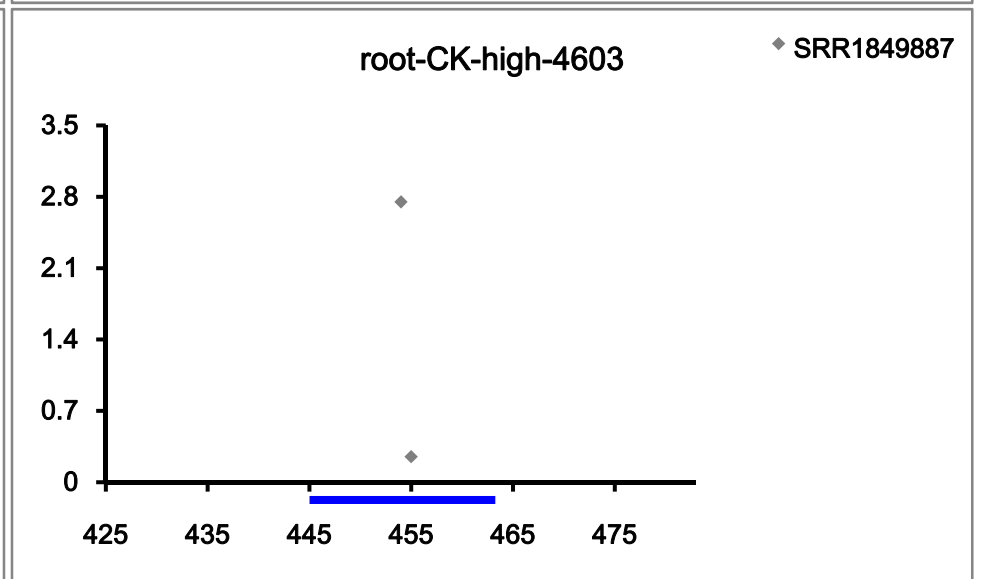

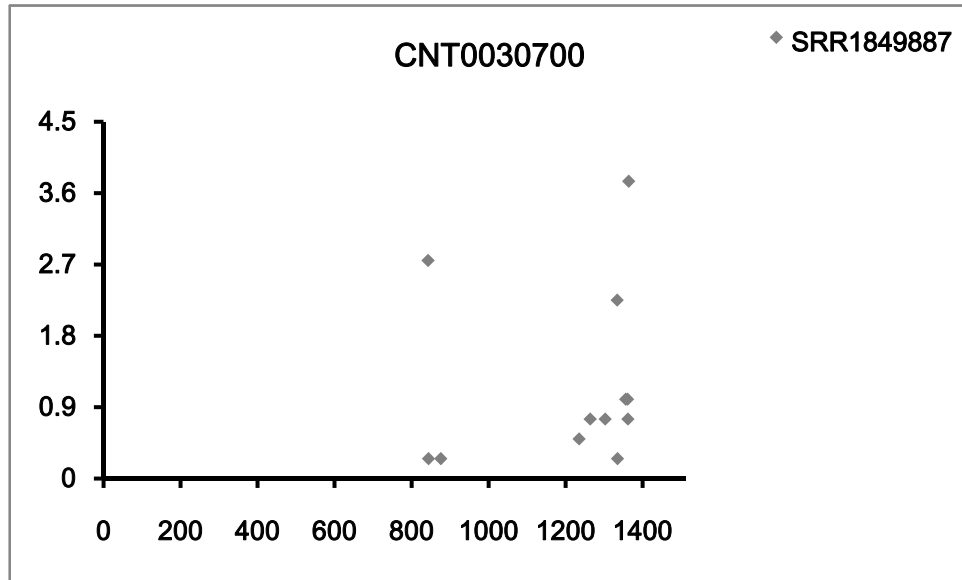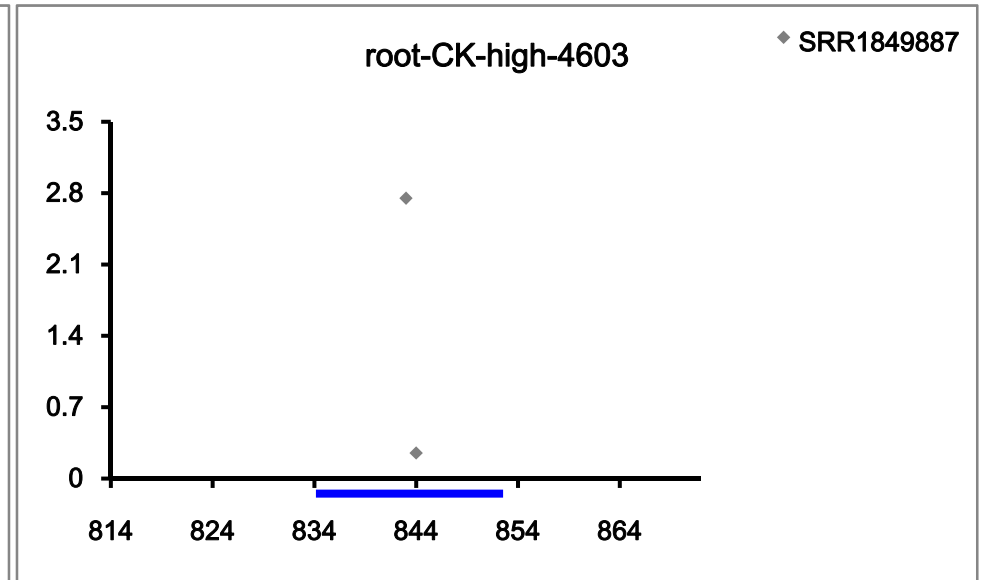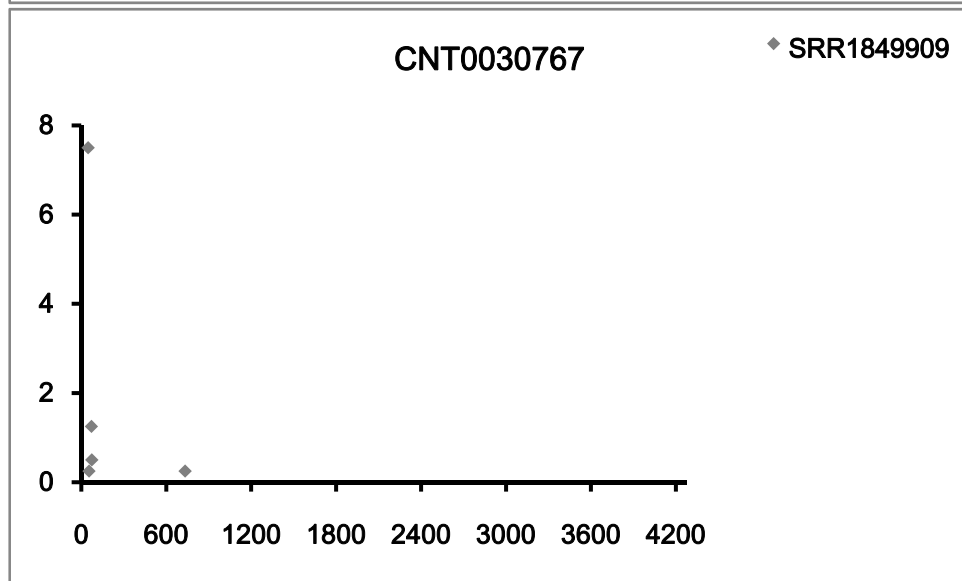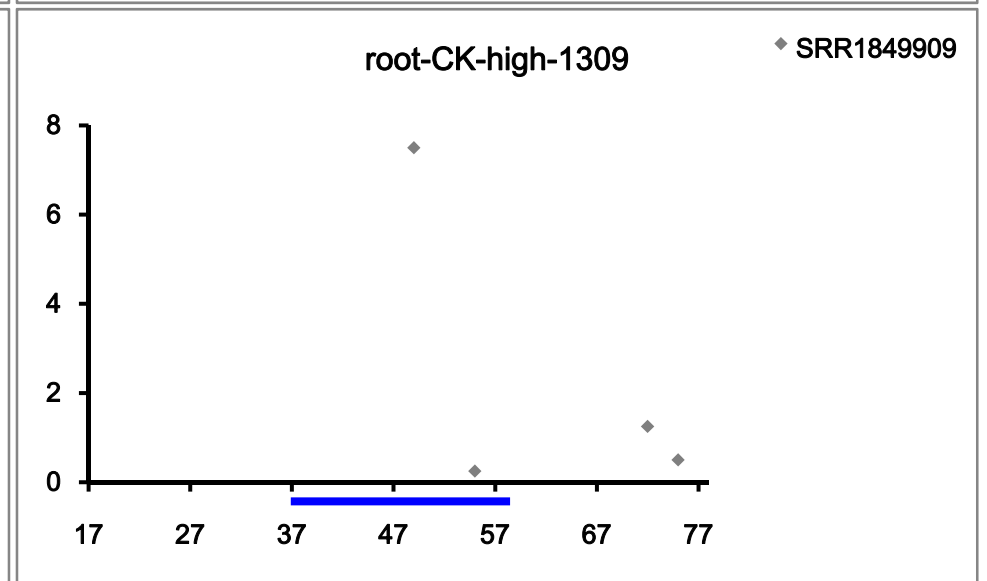

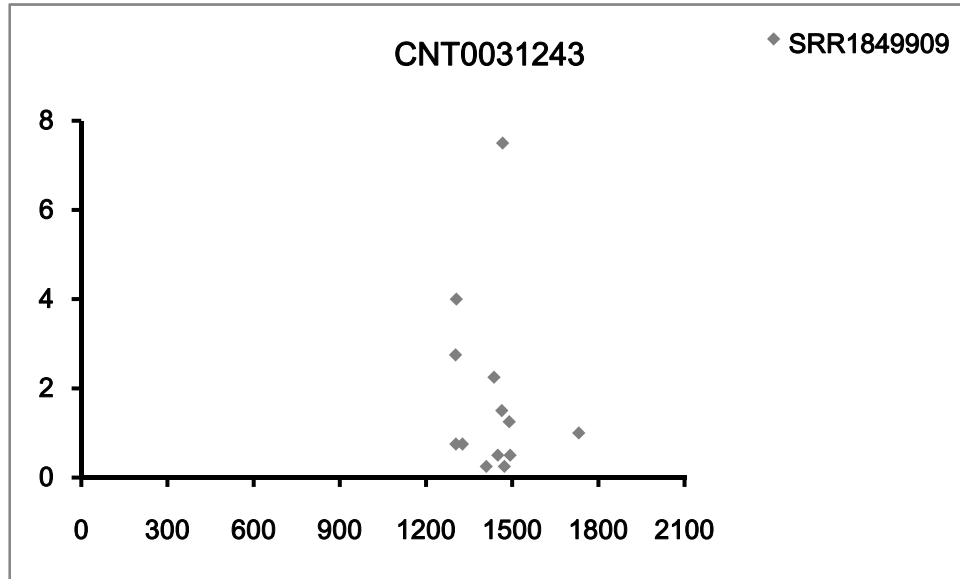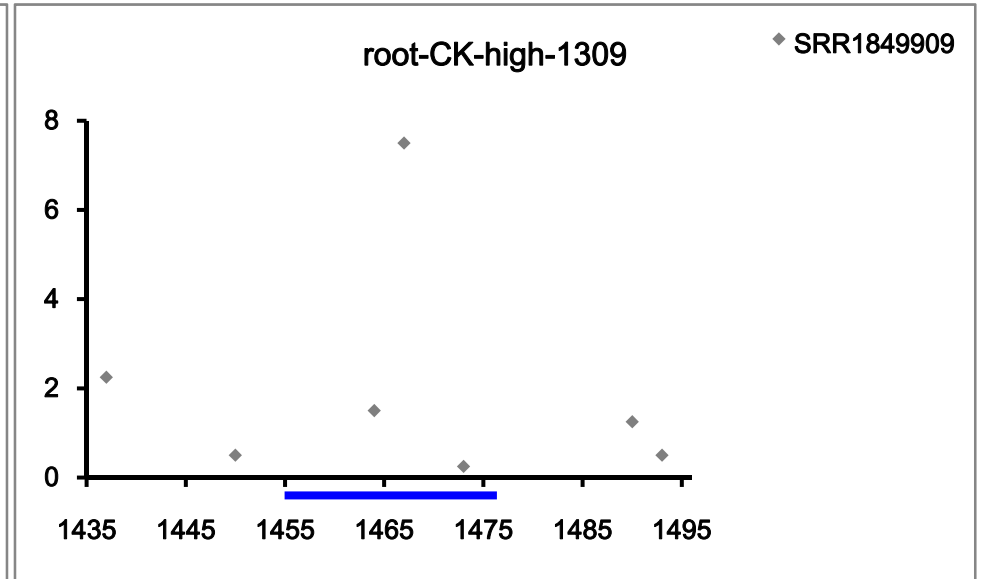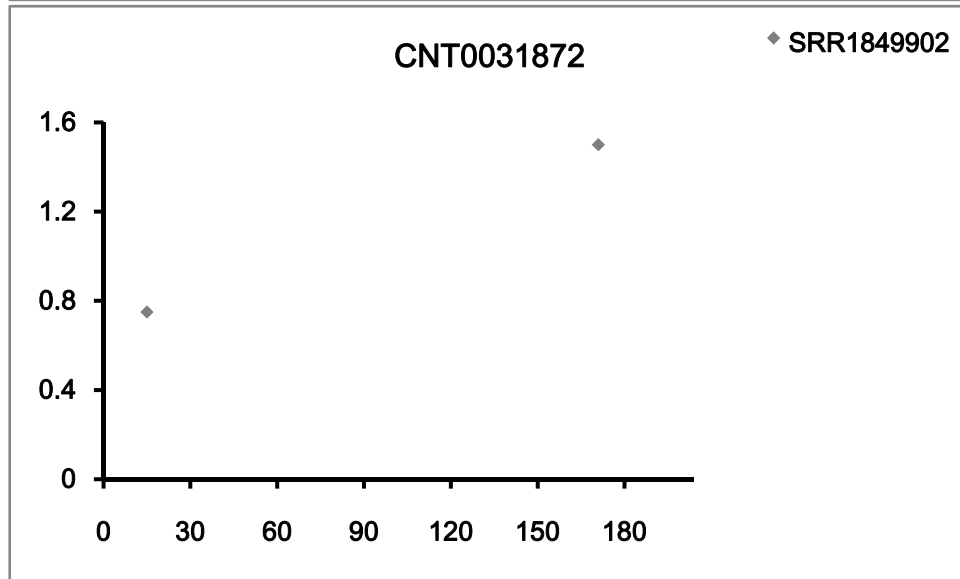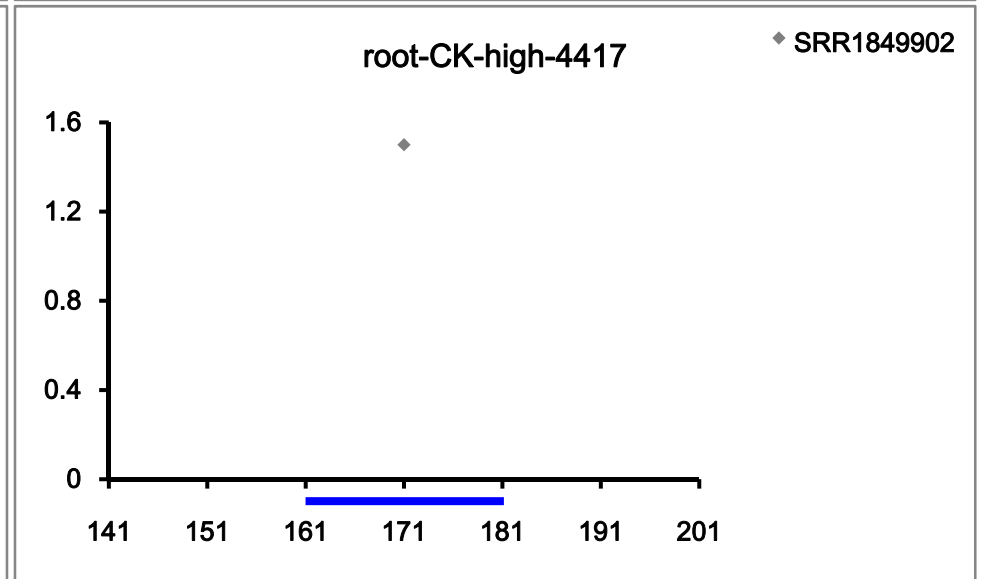

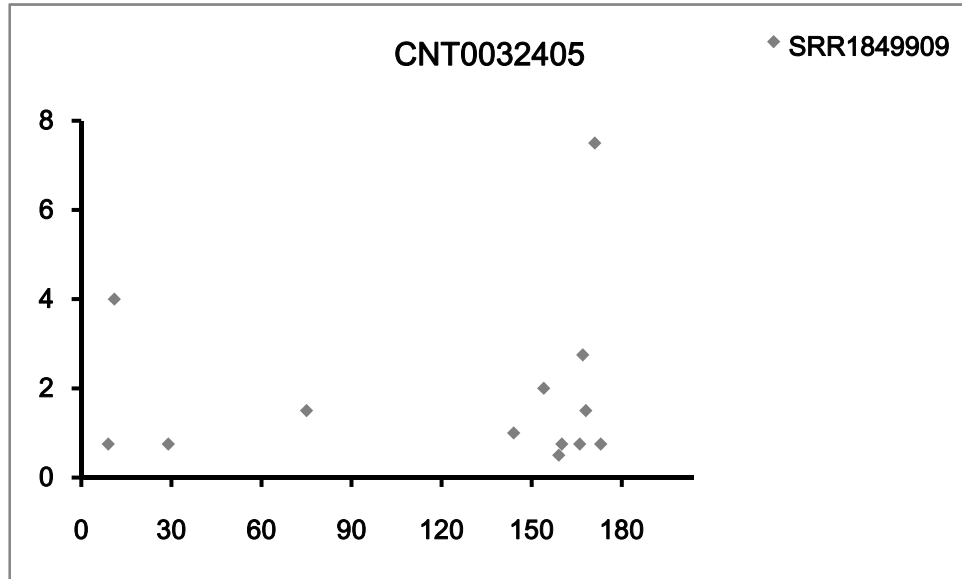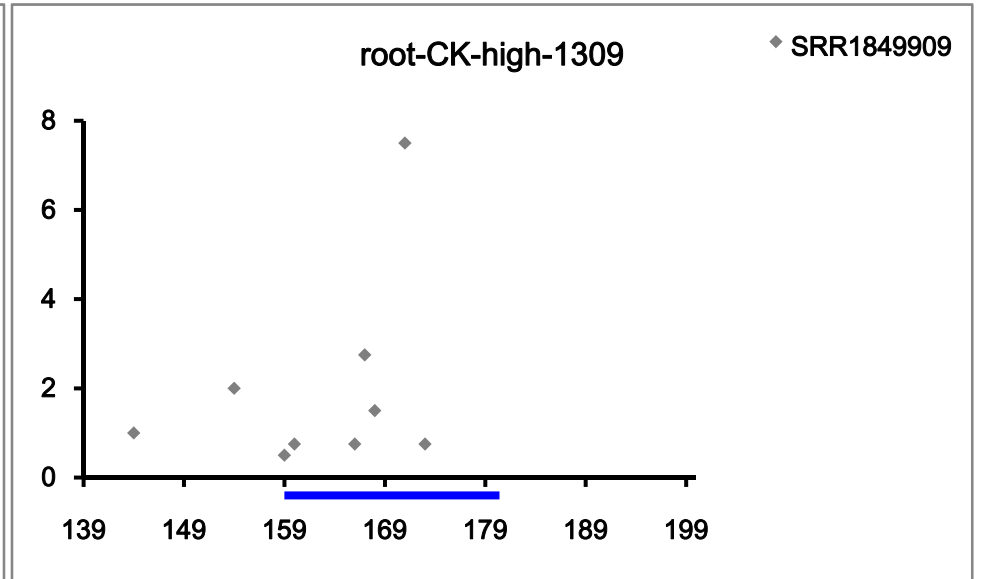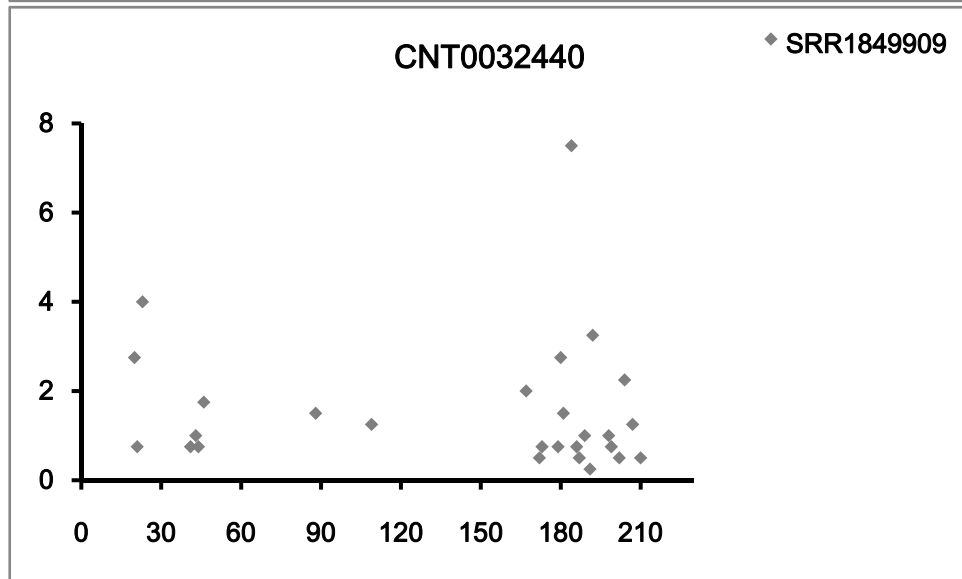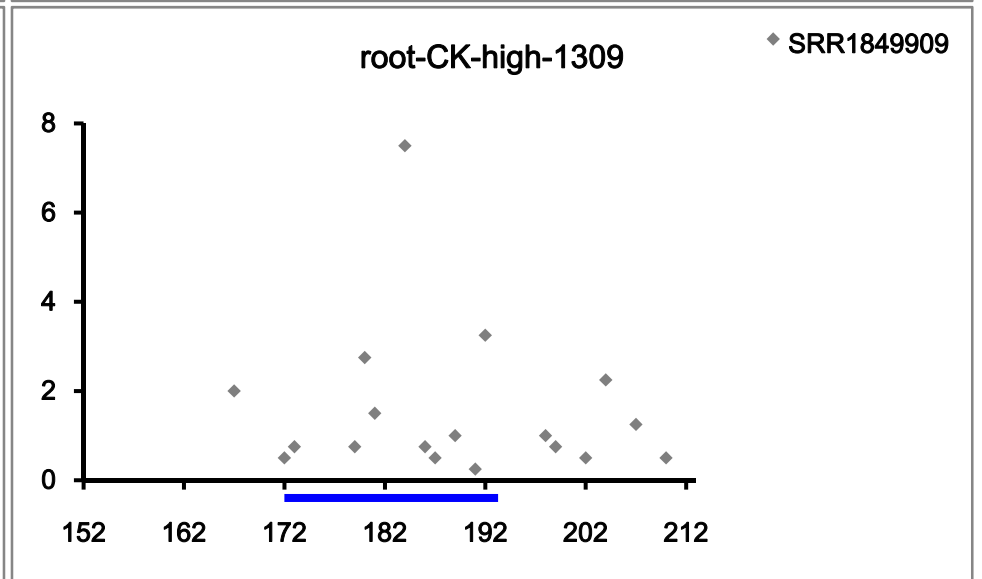

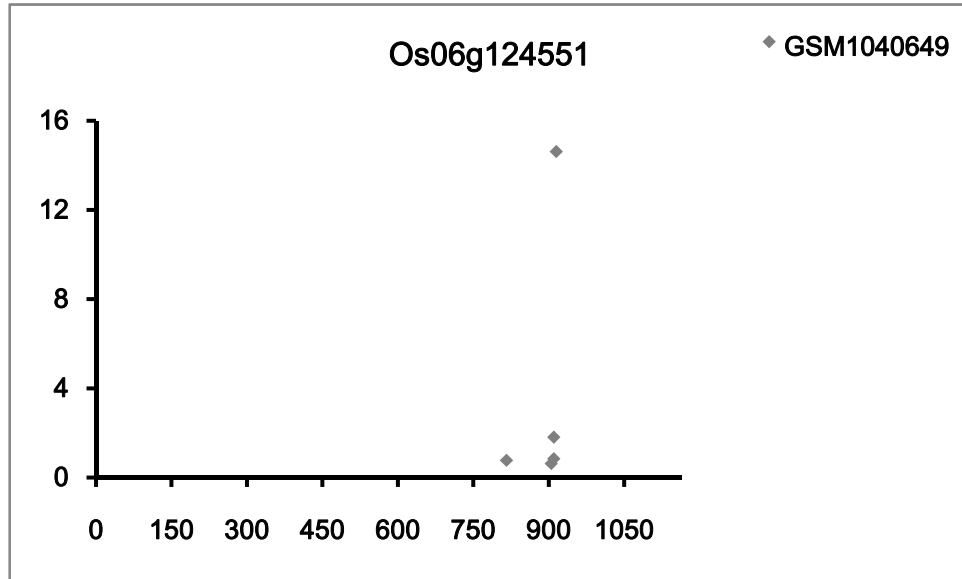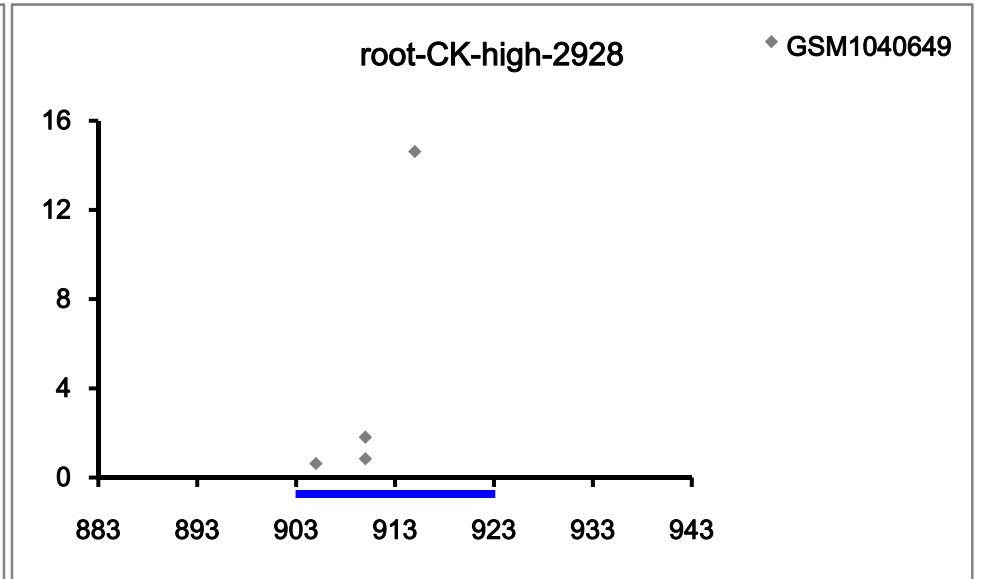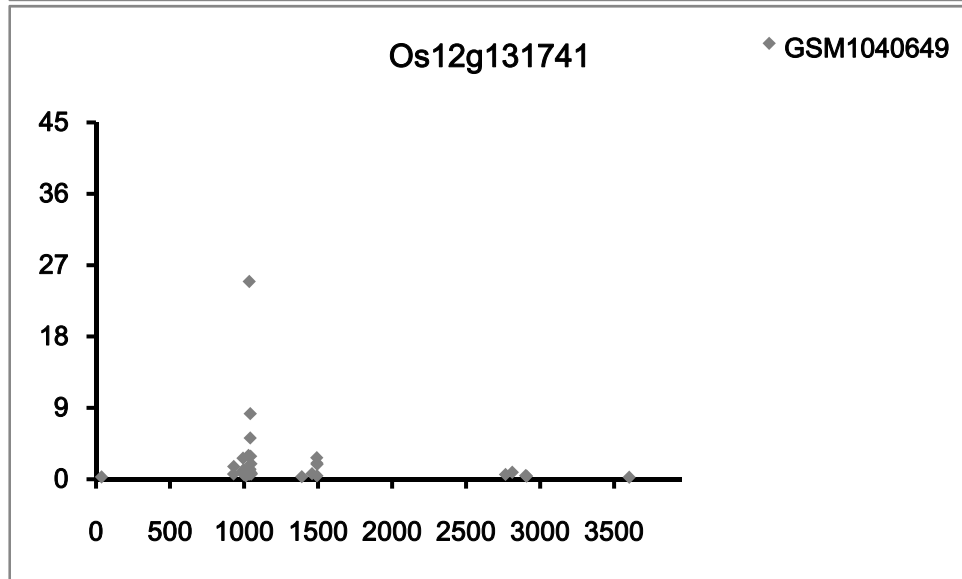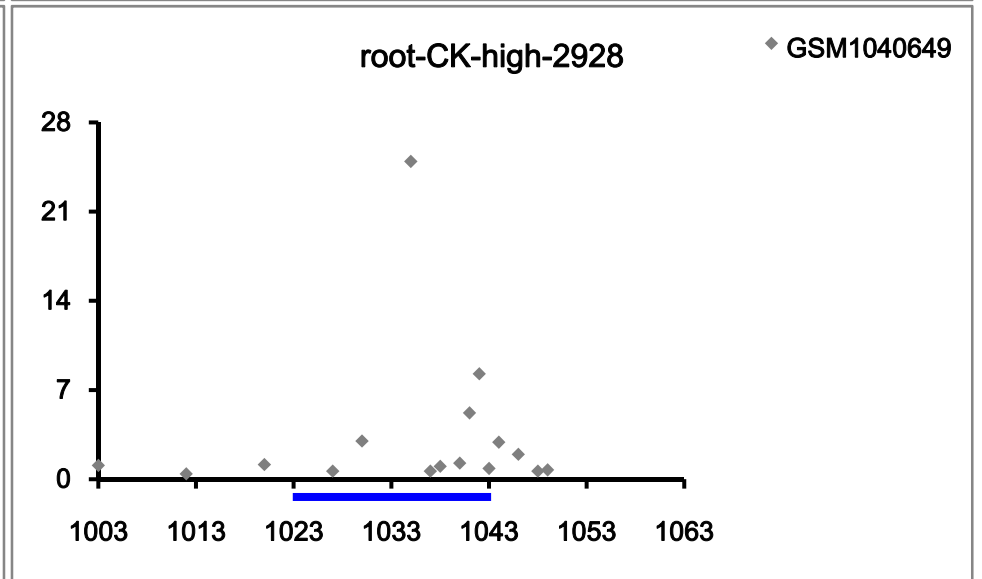

| Table S1 List of rice As-responsive miRNAs identified in this study |                 |                          |                    |
|---------------------------------------------------------------------|-----------------|--------------------------|--------------------|
| Category                                                            | miRNA           | Sequence                 | sRNA ID            |
| MiRNAs repressed by As in rice roots                                | osa-miR1428e-3p | UAAGAUA AUGCCAUGAAUUUG   | root-CK-high-77    |
| MiRNAs repressed by As in rice roots                                | osa-miR171c-5p  | GAUAUUGGUGCGGUUCAUC      | root-CK-high-561   |
| MiRNAs repressed by As in rice roots                                | osa-miR1862d    | ACUAGGUUUGUUUAUUUUGGGACG | root-CK-high-756   |
| MiRNAs repressed by As in rice roots                                | osa-miR2871a-3p | UAUUUUAGUUUCUAUGGUCAC    | root-CK-high-823   |
| MiRNAs repressed by As in rice roots                                | osa-miR156c-3p  | GCUCACUUCUCUCUCUGUCAGC   | root-CK-high-831   |
| MiRNAs repressed by As in rice roots                                | osa-miR159a.2   | UUGCAUGCCCCAGGAGCUGCA    | root-CK-high-842   |
| MiRNAs repressed by As in rice roots                                | osa-miR3979-3p  | CUUCGGGGGAGGAGAGAAGC     | root-CK-high-1561  |
| MiRNAs repressed by As in rice roots                                | osa-miR3979-5p  | UCUCUCUCUCCCUUGAAGGC     | root-CK-high-1916  |
| MiRNAs repressed by As in rice roots                                | osa-miR156h-5p  | UGACAGAAGAGAGUGAGCAC     | root-CK-high-2472  |
| MiRNAs repressed by As in rice roots                                | osa-miR1871     | AUGGCUCUGAUUCAUGUUGUUU   | root-CK-high-2970  |
| MiRNAs repressed by As in rice roots                                | osa-miR156l-3p  | GCUCACUUCUCUUUCUGUCAGC   | root-CK-high-4558  |
| MiRNAs repressed by As in rice roots                                | osa-miR1423-5p  | AGGCAACUACACGUUGGGCGCUCG | root-CK-high-4770  |
| MiRNAs repressed by As in rice roots                                | osa-miR5144-5p  | UUCUUGUGCUGCUGAAGAGAC    | root-CK-high-5089  |
| MiRNAs repressed by As in rice roots                                | osa-miR5540     | UUGUGCGAGAUCGACGGUAUA    | root-CK-high-5714  |
| MiRNAs repressed by As in rice roots                                | osa-miR171f-5p  | UGUUGGCAUGGUUCAAUCAA     | root-CK-high-6140  |
| MiRNAs repressed by As in rice roots                                | osa-miR156b-3p  | GCUCACUCUCUAUCUGUCAGC    | root-CK-high-8453  |
| MiRNAs repressed by As in rice roots                                | osa-miR156j-3p  | GCUCGCUCUCUUUCUGUCAGC    | root-CK-high-9201  |
| MiRNAs repressed by As in rice roots                                | osa-miR396b-5p  | UUCCACAGCUUUCUUGAACUG    | root-CK-high-10257 |
| MiRNAs repressed by As in rice roots                                | osa-miR169r-3p  | UGGCAAGUCUCCUCGGCUACC    | root-CK-high-11189 |
| MiRNAs repressed by As in rice roots                                | osa-miR166a-5p  | GGAAUGUUGUCUGGUUCAAGG    | root-CK-high-11266 |
| MiRNAs repressed by As in rice roots                                | osa-miR1850.1   | UGGAAAGUUGGGAGAUUGGGG    | root-CK-high-11392 |
| MiRNAs repressed by As in rice roots                                | osa-miR535-3p   | GUGCUUUCUCCCGUUGUCACU    | root-CK-high-11802 |
| MiRNAs repressed by As in rice roots                                | osa-miR5814     | AAUCAAGUUAGGAACCAUGCAAGU | root-CK-high-11843 |
| MiRNAs repressed by As in rice roots                                | osa-miR166b-5p  | GGAAUGUUGUCUGGCUCGGGG    | root-CK-high-11997 |
| MiRNAs repressed by As in rice roots                                | osa-miR397a     | UCAUUGAGUGCAGCGUUGAUG    | root-CK-high-12836 |
| MiRNAs repressed by As in rice roots                                | osa-miR5794     | UGAGGAAUCACUAGUAGUCGU    | root-CK-high-13321 |
| MiRNAs induced by As in rice shoots                                 | osa-miR1428e-3p | UAAGAUA AUGCCAUGAAUUUG   | shoot-As-high-94   |



|                                       |                  |                          |                     |
|---------------------------------------|------------------|--------------------------|---------------------|
| MiRNAs induced by As in rice shoots   | osa-miR1427      | UGCGGAACCGUGCGGUGGCGC    | shoot-As-high-1758  |
| MiRNAs induced by As in rice shoots   | osa-miR5542      | UUUGAGAAGGUAUCAUGAGAU    | shoot-As-high-3351  |
| MiRNAs induced by As in rice shoots   | osa-miR6251      | UGUGUAGCCACAUUGUAAGGG    | shoot-As-high-8166  |
| MiRNAs induced by As in rice shoots   | osa-miR169h      | UAGCCAAGGAUGACUUGCCUG    | shoot-As-high-8573  |
| MiRNAs induced by As in rice shoots   | osa-miR1863a     | AGCUCUGAUACCAUGUUAGAUUAG | shoot-As-high-8704  |
| MiRNAs induced by As in rice shoots   | osa-miR812h      | AAGACGGAUGAUUAAAGUUGGACA | shoot-As-high-14795 |
| MiRNAs repressed by As in rice shoots | osa-miR169i-5p.2 | UGGUGAUAAAGGGUGUAGCUCUG  | shoot-CK-high-6605  |
| MiRNAs repressed by As in rice shoots | osa-miR5788      | UGGAUGUGACAUAUCUCUAGUA   | shoot-CK-high-7436  |
| MiRNAs repressed by As in rice shoots | osa-miR160f-3p   | GCAUUGAGGGAGUCAUGCAGG    | shoot-CK-high-7605  |
| MiRNAs repressed by As in rice shoots | osa-miR166i-5p   | AAUGCAGUUUGAUCCAAGAUC    | shoot-CK-high-7700  |
| AS-responsive miRNAs enriched in AGO1 | osa-miR5794      | UGAGGAAUCACUAGUAGUCGU    | root-CK-high-13321  |
| AS-responsive miRNAs enriched in AGO1 | osa-miR169r-3p   | UGGCAAGUCUCCUCGGCUACC    | root-CK-high-11189  |
| AS-responsive miRNAs enriched in AGO1 | osa-miR396b-5p   | UUCCACAGCUUUCUUGAACUG    | root-CK-high-10257  |
| AS-responsive miRNAs enriched in AGO1 | osa-miR5144-5p   | UUCUUGUGCUGCUGAAGAGAC    | root-CK-high-5089   |

Table S2 Annotations of the protein-coding transcripts targeted by As-responsive sRNAs

| Transcript ID    | Annotation                                              | GO ID      | GO term                                                               | GO category |
|------------------|---------------------------------------------------------|------------|-----------------------------------------------------------------------|-------------|
| LOC_Os01g09030.1 | 2-aminoethanethiol dioxygenase, putative, expressed     | GO:0003824 | catalytic activity                                                    | F           |
| LOC_Os01g09030.1 | 2-aminoethanethiol dioxygenase, putative, expressed     | GO:0008152 | metabolic process                                                     | P           |
| LOC_Os01g48060.1 | auxin response factor, putative, expressed              | GO:0009719 | response to endogenous stimulus                                       | P           |
| LOC_Os01g48060.1 | auxin response factor, putative, expressed              | GO:0003677 | DNA binding                                                           | F           |
| LOC_Os01g48060.1 | auxin response factor, putative, expressed              | GO:0005634 | nucleus                                                               | C           |
| LOC_Os01g48060.1 | auxin response factor, putative, expressed              | GO:0009058 | biosynthetic process                                                  | P           |
| LOC_Os01g48060.1 | auxin response factor, putative, expressed              | GO:0006139 | nucleobase, nucleoside, nucleotide and nucleic acid metabolic process | P           |
| LOC_Os01g48060.1 | auxin response factor, putative, expressed              | GO:0030154 | cell differentiation                                                  | P           |
| LOC_Os01g48060.1 | auxin response factor, putative, expressed              | GO:0003700 | sequence-specific DNA binding transcription factor activity           | F           |
| LOC_Os01g48060.1 | auxin response factor, putative, expressed              | GO:0009791 | post-embryonic development                                            | P           |
| LOC_Os01g48060.1 | auxin response factor, putative, expressed              | GO:0008152 | metabolic process                                                     | P           |
| LOC_Os01g48060.1 | auxin response factor, putative, expressed              | GO:0009987 | cellular process                                                      | P           |
| LOC_Os01g48060.2 | auxin response factor, putative, expressed              | GO:0009719 | response to endogenous stimulus                                       | P           |
| LOC_Os01g48060.2 | auxin response factor, putative, expressed              | GO:0003677 | DNA binding                                                           | F           |
| LOC_Os01g48060.2 | auxin response factor, putative, expressed              | GO:0005634 | nucleus                                                               | C           |
| LOC_Os01g48060.2 | auxin response factor, putative, expressed              | GO:0009058 | biosynthetic process                                                  | P           |
| LOC_Os01g48060.2 | auxin response factor, putative, expressed              | GO:0006139 | nucleobase, nucleoside, nucleotide and nucleic acid metabolic process | P           |
| LOC_Os01g48060.2 | auxin response factor, putative, expressed              | GO:0030154 | cell differentiation                                                  | P           |
| LOC_Os01g48060.2 | auxin response factor, putative, expressed              | GO:0003700 | sequence-specific DNA binding transcription factor activity           | F           |
| LOC_Os01g48060.2 | auxin response factor, putative, expressed              | GO:0009791 | post-embryonic development                                            | P           |
| LOC_Os01g48060.2 | auxin response factor, putative, expressed              | GO:0008152 | metabolic process                                                     | P           |
| LOC_Os01g48060.2 | auxin response factor, putative, expressed              | GO:0009987 | cellular process                                                      | P           |
| LOC_Os01g48060.3 | auxin response factor, putative, expressed              | GO:0009719 | response to endogenous stimulus                                       | P           |
| LOC_Os01g48060.3 | auxin response factor, putative, expressed              | GO:0003677 | DNA binding                                                           | F           |
| LOC_Os01g48060.3 | auxin response factor, putative, expressed              | GO:0005634 | nucleus                                                               | C           |
| LOC_Os01g48060.3 | auxin response factor, putative, expressed              | GO:0009058 | biosynthetic process                                                  | P           |
| LOC_Os01g48060.3 | auxin response factor, putative, expressed              | GO:0006139 | nucleobase, nucleoside, nucleotide and nucleic acid metabolic process | P           |
| LOC_Os01g48060.3 | auxin response factor, putative, expressed              | GO:0030154 | cell differentiation                                                  | P           |
| LOC_Os01g48060.3 | auxin response factor, putative, expressed              | GO:0003700 | sequence-specific DNA binding transcription factor activity           | F           |
| LOC_Os01g48060.3 | auxin response factor, putative, expressed              | GO:0009791 | post-embryonic development                                            | P           |
| LOC_Os01g48060.3 | auxin response factor, putative, expressed              | GO:0008152 | metabolic process                                                     | P           |
| LOC_Os01g48060.3 | auxin response factor, putative, expressed              | GO:0009987 | cellular process                                                      | P           |
| LOC_Os01g54990.1 | auxin response factor, putative, expressed              | GO:0009719 | response to endogenous stimulus                                       | P           |
| LOC_Os01g54990.1 | auxin response factor, putative, expressed              | GO:0003677 | DNA binding                                                           | F           |
| LOC_Os01g54990.1 | auxin response factor, putative, expressed              | GO:0005634 | nucleus                                                               | C           |
| LOC_Os01g54990.1 | auxin response factor, putative, expressed              | GO:0009058 | biosynthetic process                                                  | P           |
| LOC_Os01g54990.1 | auxin response factor, putative, expressed              | GO:0006139 | nucleobase, nucleoside, nucleotide and nucleic acid metabolic process | P           |
| LOC_Os01g54990.1 | auxin response factor, putative, expressed              | GO:0030154 | cell differentiation                                                  | P           |
| LOC_Os01g54990.1 | auxin response factor, putative, expressed              | GO:0003700 | sequence-specific DNA binding transcription factor activity           | F           |
| LOC_Os01g54990.1 | auxin response factor, putative, expressed              | GO:0009791 | post-embryonic development                                            | P           |
| LOC_Os01g54990.1 | auxin response factor, putative, expressed              | GO:0008152 | metabolic process                                                     | P           |
| LOC_Os01g54990.1 | auxin response factor, putative, expressed              | GO:0009987 | cellular process                                                      | P           |
| LOC_Os01g55040.1 | 1,3-beta-glucan synthase component, putative, expressed | GO:0000003 | reproduction                                                          | P           |
| LOC_Os01g55040.1 | 1,3-beta-glucan synthase component, putative, expressed | GO:0007275 | multicellular organismal development                                  | P           |
| LOC_Os01g55040.1 | 1,3-beta-glucan synthase component, putative, expressed | GO:0009607 | response to biotic stimulus                                           | P           |
| LOC_Os01g55040.1 | 1,3-beta-glucan synthase component, putative, expressed | GO:0006950 | response to stress                                                    | P           |
| LOC_Os01g55040.1 | 1,3-beta-glucan synthase component, putative, expressed | GO:0009653 | anatomical structure morphogenesis                                    | P           |
| LOC_Os01g55040.1 | 1,3-beta-glucan synthase component, putative, expressed | GO:0007165 | signal transduction                                                   | P           |
| LOC_Os01g55040.1 | 1,3-beta-glucan synthase component, putative, expressed | GO:0009058 | biosynthetic process                                                  | P           |
| LOC_Os01g55040.1 | 1,3-beta-glucan synthase component, putative, expressed | GO:0005975 | carbohydrate metabolic process                                        | P           |

|                  |                                                         |            |                                                                       |   |
|------------------|---------------------------------------------------------|------------|-----------------------------------------------------------------------|---|
| LOC_Os01g55040.1 | 1,3-beta-glucan synthase component, putative, expressed | GO:0009987 | cellular process                                                      | P |
| LOC_Os01g55040.1 | 1,3-beta-glucan synthase component, putative, expressed | GO:0005886 | plasma membrane                                                       | C |
| LOC_Os01g55040.1 | 1,3-beta-glucan synthase component, putative, expressed | GO:0005575 | cellular_component                                                    | C |
| LOC_Os01g55040.1 | 1,3-beta-glucan synthase component, putative, expressed | GO:0016740 | transferase activity                                                  | F |
| LOC_Os01g59660.1 | MYB family transcription factor, putative, expressed    | GO:0009719 | response to endogenous stimulus                                       | P |
| LOC_Os01g59660.1 | MYB family transcription factor, putative, expressed    | GO:0007165 | signal transduction                                                   | P |
| LOC_Os01g59660.1 | MYB family transcription factor, putative, expressed    | GO:0040007 | growth                                                                | P |
| LOC_Os01g59660.1 | MYB family transcription factor, putative, expressed    | GO:0003677 | DNA binding                                                           | F |
| LOC_Os01g59660.1 | MYB family transcription factor, putative, expressed    | GO:0005634 | nucleus                                                               | C |
| LOC_Os01g59660.1 | MYB family transcription factor, putative, expressed    | GO:0009058 | biosynthetic process                                                  | P |
| LOC_Os01g59660.1 | MYB family transcription factor, putative, expressed    | GO:0006139 | nucleobase, nucleoside, nucleotide and nucleic acid metabolic process | P |
| LOC_Os01g59660.1 | MYB family transcription factor, putative, expressed    | GO:0000003 | reproduction                                                          | P |
| LOC_Os01g59660.1 | MYB family transcription factor, putative, expressed    | GO:0030154 | cell differentiation                                                  | P |
| LOC_Os01g59660.1 | MYB family transcription factor, putative, expressed    | GO:0007275 | multicellular organismal development                                  | P |
| LOC_Os01g59660.1 | MYB family transcription factor, putative, expressed    | GO:0008219 | cell death                                                            | P |
| LOC_Os01g59660.1 | MYB family transcription factor, putative, expressed    | GO:0003700 | sequence-specific DNA binding transcription factor activity           | F |
| LOC_Os01g59660.2 | MYB family transcription factor, putative, expressed    | GO:0009719 | response to endogenous stimulus                                       | P |
| LOC_Os01g59660.2 | MYB family transcription factor, putative, expressed    | GO:0007165 | signal transduction                                                   | P |
| LOC_Os01g59660.2 | MYB family transcription factor, putative, expressed    | GO:0040007 | growth                                                                | P |
| LOC_Os01g59660.2 | MYB family transcription factor, putative, expressed    | GO:0003677 | DNA binding                                                           | F |
| LOC_Os01g59660.2 | MYB family transcription factor, putative, expressed    | GO:0005634 | nucleus                                                               | C |
| LOC_Os01g59660.2 | MYB family transcription factor, putative, expressed    | GO:0009058 | biosynthetic process                                                  | P |
| LOC_Os01g59660.2 | MYB family transcription factor, putative, expressed    | GO:0006139 | nucleobase, nucleoside, nucleotide and nucleic acid metabolic process | P |
| LOC_Os01g59660.2 | MYB family transcription factor, putative, expressed    | GO:0000003 | reproduction                                                          | P |
| LOC_Os01g59660.2 | MYB family transcription factor, putative, expressed    | GO:0030154 | cell differentiation                                                  | P |
| LOC_Os01g59660.2 | MYB family transcription factor, putative, expressed    | GO:0007275 | multicellular organismal development                                  | P |
| LOC_Os01g59660.2 | MYB family transcription factor, putative, expressed    | GO:0008219 | cell death                                                            | P |
| LOC_Os01g59660.2 | MYB family transcription factor, putative, expressed    | GO:0003700 | sequence-specific DNA binding transcription factor activity           | F |
| LOC_Os01g59660.3 | MYB family transcription factor, putative, expressed    | GO:0040007 | growth                                                                | P |
| LOC_Os01g59660.3 | MYB family transcription factor, putative, expressed    | GO:0003677 | DNA binding                                                           | F |
| LOC_Os01g59660.3 | MYB family transcription factor, putative, expressed    | GO:0005634 | nucleus                                                               | C |
| LOC_Os01g59660.3 | MYB family transcription factor, putative, expressed    | GO:0009058 | biosynthetic process                                                  | P |
| LOC_Os01g59660.3 | MYB family transcription factor, putative, expressed    | GO:0006139 | nucleobase, nucleoside, nucleotide and nucleic acid metabolic process | P |
| LOC_Os01g59660.3 | MYB family transcription factor, putative, expressed    | GO:0000003 | reproduction                                                          | P |
| LOC_Os01g59660.3 | MYB family transcription factor, putative, expressed    | GO:0030154 | cell differentiation                                                  | P |
| LOC_Os01g59660.3 | MYB family transcription factor, putative, expressed    | GO:0007275 | multicellular organismal development                                  | P |
| LOC_Os01g59660.3 | MYB family transcription factor, putative, expressed    | GO:0009719 | response to endogenous stimulus                                       | P |
| LOC_Os01g59660.3 | MYB family transcription factor, putative, expressed    | GO:0008150 | biological_process                                                    | P |
| LOC_Os01g59660.3 | MYB family transcription factor, putative, expressed    | GO:0008219 | cell death                                                            | P |
| LOC_Os01g59660.3 | MYB family transcription factor, putative, expressed    | GO:0003700 | sequence-specific DNA binding transcription factor activity           | F |
| LOC_Os01g59660.3 | MYB family transcription factor, putative, expressed    | GO:0007165 | signal transduction                                                   | P |
| LOC_Os01g59660.4 | MYB family transcription factor, putative, expressed    | GO:0009719 | response to endogenous stimulus                                       | P |
| LOC_Os01g59660.4 | MYB family transcription factor, putative, expressed    | GO:0007165 | signal transduction                                                   | P |
| LOC_Os01g59660.4 | MYB family transcription factor, putative, expressed    | GO:0040007 | growth                                                                | P |
| LOC_Os01g59660.4 | MYB family transcription factor, putative, expressed    | GO:0003677 | DNA binding                                                           | F |
| LOC_Os01g59660.4 | MYB family transcription factor, putative, expressed    | GO:0005634 | nucleus                                                               | C |
| LOC_Os01g59660.4 | MYB family transcription factor, putative, expressed    | GO:0009058 | biosynthetic process                                                  | P |
| LOC_Os01g59660.4 | MYB family transcription factor, putative, expressed    | GO:0006139 | nucleobase, nucleoside, nucleotide and nucleic acid metabolic process | P |
| LOC_Os01g59660.4 | MYB family transcription factor, putative, expressed    | GO:0000003 | reproduction                                                          | P |
| LOC_Os01g59660.4 | MYB family transcription factor, putative, expressed    | GO:0030154 | cell differentiation                                                  | P |
| LOC_Os01g59660.4 | MYB family transcription factor, putative, expressed    | GO:0007275 | multicellular organismal development                                  | P |
| LOC_Os01g59660.4 | MYB family transcription factor, putative, expressed    | GO:0008219 | cell death                                                            | P |

|                  |                                                      |            |                                                                       |   |
|------------------|------------------------------------------------------|------------|-----------------------------------------------------------------------|---|
| LOC_Os01g59660.4 | MYB family transcription factor, putative, expressed | GO:0003700 | sequence-specific DNA binding transcription factor activity           | F |
| LOC_Os01g59720.1 | expressed protein                                    | GO:0016020 | membrane                                                              | C |
| LOC_Os01g59720.1 | expressed protein                                    | GO:0005575 | cellular_component                                                    | C |
| LOC_Os01g59720.1 | expressed protein                                    | GO:0005515 | protein binding                                                       | F |
| LOC_Os01g59720.1 | expressed protein                                    | GO:0005488 | binding                                                               | F |
| LOC_Os01g59720.1 | expressed protein                                    | GO:0005773 | vacuole                                                               | C |
| LOC_Os01g59720.1 | expressed protein                                    | GO:0006810 | transport                                                             | P |
| LOC_Os01g59720.1 | expressed protein                                    | GO:0009987 | cellular process                                                      | P |
| LOC_Os01g59720.1 | expressed protein                                    | GO:0005886 | plasma membrane                                                       | C |
| LOC_Os01g63890.1 | G10 protein, putative, expressed                     | GO:0005634 | nucleus                                                               | C |
| LOC_Os01g63890.1 | G10 protein, putative, expressed                     | GO:0005829 | cytosol                                                               | C |
| LOC_Os01g63890.1 | G10 protein, putative, expressed                     | GO:0008150 | biological_process                                                    | P |
| LOC_Os01g64520.1 | uricase, putative, expressed                         | GO:0006139 | nucleobase, nucleoside, nucleotide and nucleic acid metabolic process | P |
| LOC_Os01g64520.1 | uricase, putative, expressed                         | GO:0005777 | peroxisome                                                            | C |
| LOC_Os01g64520.1 | uricase, putative, expressed                         | GO:0008152 | metabolic process                                                     | P |
| LOC_Os01g64520.1 | uricase, putative, expressed                         | GO:0003824 | catalytic activity                                                    | F |
| LOC_Os01g64520.2 | uricase, putative, expressed                         | GO:0006139 | nucleobase, nucleoside, nucleotide and nucleic acid metabolic process | P |
| LOC_Os01g64520.2 | uricase, putative, expressed                         | GO:0005777 | peroxisome                                                            | C |
| LOC_Os01g64520.2 | uricase, putative, expressed                         | GO:0008152 | metabolic process                                                     | P |
| LOC_Os01g64520.2 | uricase, putative, expressed                         | GO:0003824 | catalytic activity                                                    | F |
| LOC_Os01g69830.1 | OsSPL2 - SBP-box gene family member, expressed       | GO:0009908 | flower development                                                    | P |
| LOC_Os01g69830.1 | OsSPL2 - SBP-box gene family member, expressed       | GO:0003677 | DNA binding                                                           | F |
| LOC_Os01g69830.1 | OsSPL2 - SBP-box gene family member, expressed       | GO:0005634 | nucleus                                                               | C |
| LOC_Os01g69830.1 | OsSPL2 - SBP-box gene family member, expressed       | GO:0009058 | biosynthetic process                                                  | P |
| LOC_Os01g69830.1 | OsSPL2 - SBP-box gene family member, expressed       | GO:0006139 | nucleobase, nucleoside, nucleotide and nucleic acid metabolic process | P |
| LOC_Os01g69830.1 | OsSPL2 - SBP-box gene family member, expressed       | GO:0003700 | sequence-specific DNA binding transcription factor activity           | F |
| LOC_Os01g70270.1 | auxin response factor, putative, expressed           | GO:0009058 | biosynthetic process                                                  | P |
| LOC_Os01g70270.1 | auxin response factor, putative, expressed           | GO:0006139 | nucleobase, nucleoside, nucleotide and nucleic acid metabolic process | P |
| LOC_Os01g70270.1 | auxin response factor, putative, expressed           | GO:0005634 | nucleus                                                               | C |
| LOC_Os01g70270.1 | auxin response factor, putative, expressed           | GO:0000003 | reproduction                                                          | P |
| LOC_Os01g70270.1 | auxin response factor, putative, expressed           | GO:0007275 | multicellular organismal development                                  | P |
| LOC_Os01g70270.1 | auxin response factor, putative, expressed           | GO:0009838 | abscission                                                            | P |
| LOC_Os01g70270.1 | auxin response factor, putative, expressed           | GO:0009908 | flower development                                                    | P |
| LOC_Os01g70270.1 | auxin response factor, putative, expressed           | GO:0009719 | response to endogenous stimulus                                       | P |
| LOC_Os01g70270.1 | auxin response factor, putative, expressed           | GO:0005515 | protein binding                                                       | F |
| LOC_Os01g70270.1 | auxin response factor, putative, expressed           | GO:0003677 | DNA binding                                                           | F |
| LOC_Os01g70270.1 | auxin response factor, putative, expressed           | GO:0003700 | sequence-specific DNA binding transcription factor activity           | F |
| LOC_Os01g70270.1 | auxin response factor, putative, expressed           | GO:0009536 | plastid                                                               | C |
| LOC_Os01g70270.1 | auxin response factor, putative, expressed           | GO:0009987 | cellular process                                                      | P |
| LOC_Os01g70270.2 | auxin response factor, putative, expressed           | GO:0009058 | biosynthetic process                                                  | P |
| LOC_Os01g70270.2 | auxin response factor, putative, expressed           | GO:0006139 | nucleobase, nucleoside, nucleotide and nucleic acid metabolic process | P |
| LOC_Os01g70270.2 | auxin response factor, putative, expressed           | GO:0005634 | nucleus                                                               | C |
| LOC_Os01g70270.2 | auxin response factor, putative, expressed           | GO:0000003 | reproduction                                                          | P |
| LOC_Os01g70270.2 | auxin response factor, putative, expressed           | GO:0007275 | multicellular organismal development                                  | P |
| LOC_Os01g70270.2 | auxin response factor, putative, expressed           | GO:0009838 | abscission                                                            | P |
| LOC_Os01g70270.2 | auxin response factor, putative, expressed           | GO:0009908 | flower development                                                    | P |
| LOC_Os01g70270.2 | auxin response factor, putative, expressed           | GO:0009719 | response to endogenous stimulus                                       | P |
| LOC_Os01g70270.2 | auxin response factor, putative, expressed           | GO:0005515 | protein binding                                                       | F |
| LOC_Os01g70270.2 | auxin response factor, putative, expressed           | GO:0003677 | DNA binding                                                           | F |
| LOC_Os01g70270.2 | auxin response factor, putative, expressed           | GO:0003700 | sequence-specific DNA binding transcription factor activity           | F |
| LOC_Os01g70270.2 | auxin response factor, putative, expressed           | GO:0009536 | plastid                                                               | C |
| LOC_Os01g70270.2 | auxin response factor, putative, expressed           | GO:0009987 | cellular process                                                      | P |

|                  |                                                |            |                                                                       |   |
|------------------|------------------------------------------------|------------|-----------------------------------------------------------------------|---|
| LOC_Os01g70270.3 | auxin response factor, putative, expressed     | GO:0009058 | biosynthetic process                                                  | P |
| LOC_Os01g70270.3 | auxin response factor, putative, expressed     | GO:0006139 | nucleobase, nucleoside, nucleotide and nucleic acid metabolic process | P |
| LOC_Os01g70270.3 | auxin response factor, putative, expressed     | GO:0005634 | nucleus                                                               | C |
| LOC_Os01g70270.3 | auxin response factor, putative, expressed     | GO:0000003 | reproduction                                                          | P |
| LOC_Os01g70270.3 | auxin response factor, putative, expressed     | GO:0007275 | multicellular organismal development                                  | P |
| LOC_Os01g70270.3 | auxin response factor, putative, expressed     | GO:0009838 | abscission                                                            | P |
| LOC_Os01g70270.3 | auxin response factor, putative, expressed     | GO:0009908 | flower development                                                    | P |
| LOC_Os01g70270.3 | auxin response factor, putative, expressed     | GO:0009719 | response to endogenous stimulus                                       | P |
| LOC_Os01g70270.3 | auxin response factor, putative, expressed     | GO:0005515 | protein binding                                                       | F |
| LOC_Os01g70270.3 | auxin response factor, putative, expressed     | GO:0003677 | DNA binding                                                           | F |
| LOC_Os01g70270.3 | auxin response factor, putative, expressed     | GO:0003700 | sequence-specific DNA binding transcription factor activity           | F |
| LOC_Os01g70270.3 | auxin response factor, putative, expressed     | GO:0009536 | plastid                                                               | C |
| LOC_Os01g70270.3 | auxin response factor, putative, expressed     | GO:0009987 | cellular process                                                      | P |
| LOC_Os01g70270.4 | auxin response factor, putative, expressed     | GO:0009058 | biosynthetic process                                                  | P |
| LOC_Os01g70270.4 | auxin response factor, putative, expressed     | GO:0006139 | nucleobase, nucleoside, nucleotide and nucleic acid metabolic process | P |
| LOC_Os01g70270.4 | auxin response factor, putative, expressed     | GO:0005634 | nucleus                                                               | C |
| LOC_Os01g70270.4 | auxin response factor, putative, expressed     | GO:0000003 | reproduction                                                          | P |
| LOC_Os01g70270.4 | auxin response factor, putative, expressed     | GO:0007275 | multicellular organismal development                                  | P |
| LOC_Os01g70270.4 | auxin response factor, putative, expressed     | GO:0009838 | abscission                                                            | P |
| LOC_Os01g70270.4 | auxin response factor, putative, expressed     | GO:0009908 | flower development                                                    | P |
| LOC_Os01g70270.4 | auxin response factor, putative, expressed     | GO:0009719 | response to endogenous stimulus                                       | P |
| LOC_Os01g70270.4 | auxin response factor, putative, expressed     | GO:0005515 | protein binding                                                       | F |
| LOC_Os01g70270.4 | auxin response factor, putative, expressed     | GO:0003677 | DNA binding                                                           | F |
| LOC_Os01g70270.4 | auxin response factor, putative, expressed     | GO:0003700 | sequence-specific DNA binding transcription factor activity           | F |
| LOC_Os01g70270.4 | auxin response factor, putative, expressed     | GO:0009536 | plastid                                                               | C |
| LOC_Os01g70270.4 | auxin response factor, putative, expressed     | GO:0009987 | cellular process                                                      | P |
| LOC_Os02g04680.1 | OsSPL3 - SBP-box gene family member, expressed | GO:0009908 | flower development                                                    | P |
| LOC_Os02g04680.1 | OsSPL3 - SBP-box gene family member, expressed | GO:0003677 | DNA binding                                                           | F |
| LOC_Os02g04680.1 | OsSPL3 - SBP-box gene family member, expressed | GO:0005634 | nucleus                                                               | C |
| LOC_Os02g04680.1 | OsSPL3 - SBP-box gene family member, expressed | GO:0007275 | multicellular organismal development                                  | P |
| LOC_Os02g04680.1 | OsSPL3 - SBP-box gene family member, expressed | GO:0009058 | biosynthetic process                                                  | P |
| LOC_Os02g04680.1 | OsSPL3 - SBP-box gene family member, expressed | GO:0006139 | nucleobase, nucleoside, nucleotide and nucleic acid metabolic process | P |
| LOC_Os02g04680.1 | OsSPL3 - SBP-box gene family member, expressed | GO:0003700 | sequence-specific DNA binding transcription factor activity           | F |
| LOC_Os02g04680.2 | OsSPL3 - SBP-box gene family member, expressed | GO:0009908 | flower development                                                    | P |
| LOC_Os02g04680.2 | OsSPL3 - SBP-box gene family member, expressed | GO:0003677 | DNA binding                                                           | F |
| LOC_Os02g04680.2 | OsSPL3 - SBP-box gene family member, expressed | GO:0005634 | nucleus                                                               | C |
| LOC_Os02g04680.2 | OsSPL3 - SBP-box gene family member, expressed | GO:0007275 | multicellular organismal development                                  | P |
| LOC_Os02g04680.2 | OsSPL3 - SBP-box gene family member, expressed | GO:0009058 | biosynthetic process                                                  | P |
| LOC_Os02g04680.2 | OsSPL3 - SBP-box gene family member, expressed | GO:0006139 | nucleobase, nucleoside, nucleotide and nucleic acid metabolic process | P |
| LOC_Os02g04680.2 | OsSPL3 - SBP-box gene family member, expressed | GO:0003700 | sequence-specific DNA binding transcription factor activity           | F |
| LOC_Os02g06910.1 | auxin response factor 6, putative, expressed   | GO:0009908 | flower development                                                    | P |
| LOC_Os02g06910.1 | auxin response factor 6, putative, expressed   | GO:0009719 | response to endogenous stimulus                                       | P |
| LOC_Os02g06910.1 | auxin response factor 6, putative, expressed   | GO:0005634 | nucleus                                                               | C |
| LOC_Os02g06910.1 | auxin response factor 6, putative, expressed   | GO:0009058 | biosynthetic process                                                  | P |
| LOC_Os02g06910.1 | auxin response factor 6, putative, expressed   | GO:0006139 | nucleobase, nucleoside, nucleotide and nucleic acid metabolic process | P |
| LOC_Os02g06910.1 | auxin response factor 6, putative, expressed   | GO:0003700 | sequence-specific DNA binding transcription factor activity           | F |
| LOC_Os02g07780.1 | OsSPL4 - SBP-box gene family member, expressed | GO:0009908 | flower development                                                    | P |
| LOC_Os02g07780.1 | OsSPL4 - SBP-box gene family member, expressed | GO:0003677 | DNA binding                                                           | F |
| LOC_Os02g07780.1 | OsSPL4 - SBP-box gene family member, expressed | GO:0005634 | nucleus                                                               | C |
| LOC_Os02g07780.1 | OsSPL4 - SBP-box gene family member, expressed | GO:0007275 | multicellular organismal development                                  | P |
| LOC_Os02g07780.1 | OsSPL4 - SBP-box gene family member, expressed | GO:0009058 | biosynthetic process                                                  | P |
| LOC_Os02g07780.1 | OsSPL4 - SBP-box gene family member, expressed | GO:0006139 | nucleobase, nucleoside, nucleotide and nucleic acid metabolic process | P |

|                  |                                                                    |            |                                                                       |   |
|------------------|--------------------------------------------------------------------|------------|-----------------------------------------------------------------------|---|
| LOC_Os02g07780.1 | OsSPL4 - SBP-box gene family member, expressed                     | GO:0003700 | sequence-specific DNA binding transcription factor activity           | F |
| LOC_Os02g07780.2 | OsSPL4 - SBP-box gene family member, expressed                     | GO:0009908 | flower development                                                    | P |
| LOC_Os02g07780.2 | OsSPL4 - SBP-box gene family member, expressed                     | GO:0003677 | DNA binding                                                           | F |
| LOC_Os02g07780.2 | OsSPL4 - SBP-box gene family member, expressed                     | GO:0005634 | nucleus                                                               | C |
| LOC_Os02g07780.2 | OsSPL4 - SBP-box gene family member, expressed                     | GO:0007275 | multicellular organismal development                                  | P |
| LOC_Os02g07780.2 | OsSPL4 - SBP-box gene family member, expressed                     | GO:0009058 | biosynthetic process                                                  | P |
| LOC_Os02g07780.2 | OsSPL4 - SBP-box gene family member, expressed                     | GO:0006139 | nucleobase, nucleoside, nucleotide and nucleic acid metabolic process | P |
| LOC_Os02g07780.2 | OsSPL4 - SBP-box gene family member, expressed                     | GO:0003700 | sequence-specific DNA binding transcription factor activity           | F |
| LOC_Os02g07960.4 | STRUBBELIG-RECEPTOR FAMILY 3 precursor, putative, expressed        | GO:0008150 | biological_process                                                    | P |
| LOC_Os02g07960.4 | STRUBBELIG-RECEPTOR FAMILY 3 precursor, putative, expressed        | GO:0007165 | signal transduction                                                   | P |
| LOC_Os02g07960.4 | STRUBBELIG-RECEPTOR FAMILY 3 precursor, putative, expressed        | GO:0016301 | kinase activity                                                       | F |
| LOC_Os02g07960.4 | STRUBBELIG-RECEPTOR FAMILY 3 precursor, putative, expressed        | GO:0000166 | nucleotide binding                                                    | F |
| LOC_Os02g07960.4 | STRUBBELIG-RECEPTOR FAMILY 3 precursor, putative, expressed        | GO:0006464 | protein modification process                                          | P |
| LOC_Os02g07960.4 | STRUBBELIG-RECEPTOR FAMILY 3 precursor, putative, expressed        | GO:0005886 | plasma membrane                                                       | C |
| LOC_Os02g14290.1 | scramblase, putative, expressed                                    | GO:0003674 | molecular_function                                                    | F |
| LOC_Os02g14290.1 | scramblase, putative, expressed                                    | GO:0009536 | plastid                                                               | C |
| LOC_Os02g14290.1 | scramblase, putative, expressed                                    | GO:0005739 | mitochondrion                                                         | C |
| LOC_Os02g14290.1 | scramblase, putative, expressed                                    | GO:0008150 | biological_process                                                    | P |
| LOC_Os02g29140.1 | ankyrin, putative, expressed                                       | GO:0005575 | cellular_component                                                    | C |
| LOC_Os02g29140.1 | ankyrin, putative, expressed                                       | GO:0008150 | biological_process                                                    | P |
| LOC_Os02g29140.1 | ankyrin, putative, expressed                                       | GO:0005488 | binding                                                               | F |
| LOC_Os02g36924.1 | OsMADS27 - MADS-box family gene with MIKCC type-box, expressed     | GO:0009791 | post-embryonic development                                            | P |
| LOC_Os02g36924.1 | OsMADS27 - MADS-box family gene with MIKCC type-box, expressed     | GO:0009987 | cellular process                                                      | P |
| LOC_Os02g36924.1 | OsMADS27 - MADS-box family gene with MIKCC type-box, expressed     | GO:0005515 | protein binding                                                       | F |
| LOC_Os02g36924.1 | OsMADS27 - MADS-box family gene with MIKCC type-box, expressed     | GO:0009058 | biosynthetic process                                                  | P |
| LOC_Os02g36924.1 | OsMADS27 - MADS-box family gene with MIKCC type-box, expressed     | GO:0006139 | nucleobase, nucleoside, nucleotide and nucleic acid metabolic process | P |
| LOC_Os02g36924.1 | OsMADS27 - MADS-box family gene with MIKCC type-box, expressed     | GO:0003700 | sequence-specific DNA binding transcription factor activity           | F |
| LOC_Os02g41800.1 | auxin response factor, putative, expressed                         | GO:0007275 | multicellular organismal development                                  | P |
| LOC_Os02g41800.1 | auxin response factor, putative, expressed                         | GO:0009719 | response to endogenous stimulus                                       | P |
| LOC_Os02g41800.1 | auxin response factor, putative, expressed                         | GO:0005634 | nucleus                                                               | C |
| LOC_Os02g41800.1 | auxin response factor, putative, expressed                         | GO:0009987 | cellular process                                                      | P |
| LOC_Os02g41800.1 | auxin response factor, putative, expressed                         | GO:0003723 | RNA binding                                                           | F |
| LOC_Os02g41800.1 | auxin response factor, putative, expressed                         | GO:0009058 | biosynthetic process                                                  | P |
| LOC_Os02g41800.1 | auxin response factor, putative, expressed                         | GO:0006139 | nucleobase, nucleoside, nucleotide and nucleic acid metabolic process | P |
| LOC_Os02g41800.1 | auxin response factor, putative, expressed                         | GO:0003700 | sequence-specific DNA binding transcription factor activity           | F |
| LOC_Os02g41800.2 | auxin response factor, putative, expressed                         | GO:0007275 | multicellular organismal development                                  | P |
| LOC_Os02g41800.2 | auxin response factor, putative, expressed                         | GO:0009719 | response to endogenous stimulus                                       | P |
| LOC_Os02g41800.2 | auxin response factor, putative, expressed                         | GO:0005634 | nucleus                                                               | C |
| LOC_Os02g41800.2 | auxin response factor, putative, expressed                         | GO:0009987 | cellular process                                                      | P |
| LOC_Os02g41800.2 | auxin response factor, putative, expressed                         | GO:0003723 | RNA binding                                                           | F |
| LOC_Os02g41800.2 | auxin response factor, putative, expressed                         | GO:0009058 | biosynthetic process                                                  | P |
| LOC_Os02g41800.2 | auxin response factor, putative, expressed                         | GO:0006139 | nucleobase, nucleoside, nucleotide and nucleic acid metabolic process | P |
| LOC_Os02g41800.2 | auxin response factor, putative, expressed                         | GO:0003700 | sequence-specific DNA binding transcription factor activity           | F |
| LOC_Os02g43560.1 | WRKY34, expressed                                                  | GO:0009058 | biosynthetic process                                                  | P |
| LOC_Os02g43560.1 | WRKY34, expressed                                                  | GO:0006139 | nucleobase, nucleoside, nucleotide and nucleic acid metabolic process | P |
| LOC_Os02g43560.1 | WRKY34, expressed                                                  | GO:0003700 | sequence-specific DNA binding transcription factor activity           | F |
| LOC_Os02g44360.1 | scarecrow transcription factor family protein, putative, expressed | GO:0008150 | biological_process                                                    | P |
| LOC_Os02g44360.1 | scarecrow transcription factor family protein, putative, expressed | GO:0030154 | cell differentiation                                                  | P |
| LOC_Os02g44360.1 | scarecrow transcription factor family protein, putative, expressed | GO:0009058 | biosynthetic process                                                  | P |
| LOC_Os02g44360.1 | scarecrow transcription factor family protein, putative, expressed | GO:0006139 | nucleobase, nucleoside, nucleotide and nucleic acid metabolic process | P |
| LOC_Os02g44360.1 | scarecrow transcription factor family protein, putative, expressed | GO:0016043 | cellular component organization                                       | P |
| LOC_Os02g44360.1 | scarecrow transcription factor family protein, putative, expressed | GO:0009653 | anatomical structure morphogenesis                                    | P |

|                  |                                                                    |            |                                                                       |   |
|------------------|--------------------------------------------------------------------|------------|-----------------------------------------------------------------------|---|
| LOC_Os02g44360.1 | scarecrow transcription factor family protein, putative, expressed | GO:0016049 | cell growth                                                           | P |
| LOC_Os02g44360.1 | scarecrow transcription factor family protein, putative, expressed | GO:0007275 | multicellular organismal development                                  | P |
| LOC_Os02g44360.1 | scarecrow transcription factor family protein, putative, expressed | GO:0005515 | protein binding                                                       | F |
| LOC_Os02g44360.1 | scarecrow transcription factor family protein, putative, expressed | GO:0009987 | cellular process                                                      | P |
| LOC_Os02g44360.1 | scarecrow transcription factor family protein, putative, expressed | GO:0003700 | sequence-specific DNA binding transcription factor activity           | F |
| LOC_Os02g44360.1 | scarecrow transcription factor family protein, putative, expressed | GO:0009536 | plastid                                                               | C |
| LOC_Os02g44370.1 | scarecrow, putative, expressed                                     | GO:0008150 | biological_process                                                    | P |
| LOC_Os02g44370.1 | scarecrow, putative, expressed                                     | GO:0030154 | cell differentiation                                                  | P |
| LOC_Os02g44370.1 | scarecrow, putative, expressed                                     | GO:0009058 | biosynthetic process                                                  | P |
| LOC_Os02g44370.1 | scarecrow, putative, expressed                                     | GO:0006139 | nucleobase, nucleoside, nucleotide and nucleic acid metabolic process | P |
| LOC_Os02g44370.1 | scarecrow, putative, expressed                                     | GO:0016043 | cellular component organization                                       | P |
| LOC_Os02g44370.1 | scarecrow, putative, expressed                                     | GO:0009653 | anatomical structure morphogenesis                                    | P |
| LOC_Os02g44370.1 | scarecrow, putative, expressed                                     | GO:0016049 | cell growth                                                           | P |
| LOC_Os02g44370.1 | scarecrow, putative, expressed                                     | GO:0007275 | multicellular organismal development                                  | P |
| LOC_Os02g44370.1 | scarecrow, putative, expressed                                     | GO:0005515 | protein binding                                                       | F |
| LOC_Os02g44370.1 | scarecrow, putative, expressed                                     | GO:0009987 | cellular process                                                      | P |
| LOC_Os02g44370.1 | scarecrow, putative, expressed                                     | GO:0003700 | sequence-specific DNA binding transcription factor activity           | F |
| LOC_Os02g44370.1 | scarecrow, putative, expressed                                     | GO:0009536 | plastid                                                               | C |
| LOC_Os02g44990.1 | OsFBDF13 - F-box and DUF domain containing protein, expressed      | GO:0003674 | molecular_function                                                    | F |
| LOC_Os02g44990.1 | OsFBDF13 - F-box and DUF domain containing protein, expressed      | GO:0005575 | cellular_component                                                    | C |
| LOC_Os02g44990.1 | OsFBDF13 - F-box and DUF domain containing protein, expressed      | GO:0008150 | biological_process                                                    | P |
| LOC_Os02g45070.1 | PINHEAD, putative, expressed                                       | GO:0009719 | response to endogenous stimulus                                       | P |
| LOC_Os02g45070.1 | PINHEAD, putative, expressed                                       | GO:0006950 | response to stress                                                    | P |
| LOC_Os02g45070.1 | PINHEAD, putative, expressed                                       | GO:0009607 | response to biotic stimulus                                           | P |
| LOC_Os02g45070.1 | PINHEAD, putative, expressed                                       | GO:0009653 | anatomical structure morphogenesis                                    | P |
| LOC_Os02g45070.1 | PINHEAD, putative, expressed                                       | GO:0007275 | multicellular organismal development                                  | P |
| LOC_Os02g45070.1 | PINHEAD, putative, expressed                                       | GO:0005737 | cytoplasm                                                             | C |
| LOC_Os02g45070.1 | PINHEAD, putative, expressed                                       | GO:0004518 | nuclease activity                                                     | F |
| LOC_Os02g45070.1 | PINHEAD, putative, expressed                                       | GO:0040029 | regulation of gene expression, epigenetic                             | P |
| LOC_Os02g45070.1 | PINHEAD, putative, expressed                                       | GO:0009987 | cellular process                                                      | P |
| LOC_Os02g45070.1 | PINHEAD, putative, expressed                                       | GO:0030154 | cell differentiation                                                  | P |
| LOC_Os02g45070.1 | PINHEAD, putative, expressed                                       | GO:0005515 | protein binding                                                       | F |
| LOC_Os02g45070.1 | PINHEAD, putative, expressed                                       | GO:0009628 | response to abiotic stimulus                                          | P |
| LOC_Os02g45070.1 | PINHEAD, putative, expressed                                       | GO:0005829 | cytosol                                                               | C |
| LOC_Os02g45070.1 | PINHEAD, putative, expressed                                       | GO:0003723 | RNA binding                                                           | F |
| LOC_Os02g45070.1 | PINHEAD, putative, expressed                                       | GO:0005634 | nucleus                                                               | C |
| LOC_Os02g45070.1 | PINHEAD, putative, expressed                                       | GO:0008152 | metabolic process                                                     | P |
| LOC_Os02g45070.1 | PINHEAD, putative, expressed                                       | GO:0000003 | reproduction                                                          | P |
| LOC_Os02g45070.1 | PINHEAD, putative, expressed                                       | GO:0009791 | post-embryonic development                                            | P |
| LOC_Os02g45070.1 | PINHEAD, putative, expressed                                       | GO:0009790 | embryo development                                                    | P |
| LOC_Os02g45070.2 | PINHEAD, putative, expressed                                       | GO:0009719 | response to endogenous stimulus                                       | P |
| LOC_Os02g45070.2 | PINHEAD, putative, expressed                                       | GO:0006950 | response to stress                                                    | P |
| LOC_Os02g45070.2 | PINHEAD, putative, expressed                                       | GO:0009607 | response to biotic stimulus                                           | P |
| LOC_Os02g45070.2 | PINHEAD, putative, expressed                                       | GO:0009653 | anatomical structure morphogenesis                                    | P |
| LOC_Os02g45070.2 | PINHEAD, putative, expressed                                       | GO:0007275 | multicellular organismal development                                  | P |
| LOC_Os02g45070.2 | PINHEAD, putative, expressed                                       | GO:0005737 | cytoplasm                                                             | C |
| LOC_Os02g45070.2 | PINHEAD, putative, expressed                                       | GO:0004518 | nuclease activity                                                     | F |
| LOC_Os02g45070.2 | PINHEAD, putative, expressed                                       | GO:0040029 | regulation of gene expression, epigenetic                             | P |
| LOC_Os02g45070.2 | PINHEAD, putative, expressed                                       | GO:0009987 | cellular process                                                      | P |
| LOC_Os02g45070.2 | PINHEAD, putative, expressed                                       | GO:0030154 | cell differentiation                                                  | P |
| LOC_Os02g45070.2 | PINHEAD, putative, expressed                                       | GO:0005515 | protein binding                                                       | F |
| LOC_Os02g45070.2 | PINHEAD, putative, expressed                                       | GO:0009628 | response to abiotic stimulus                                          | P |

|                  |                                                                            |            |                                                                       |   |
|------------------|----------------------------------------------------------------------------|------------|-----------------------------------------------------------------------|---|
| LOC_Os02g45070.2 | PINHEAD, putative, expressed                                               | GO:0005829 | cytosol                                                               | C |
| LOC_Os02g45070.2 | PINHEAD, putative, expressed                                               | GO:0003723 | RNA binding                                                           | F |
| LOC_Os02g45070.2 | PINHEAD, putative, expressed                                               | GO:0005634 | nucleus                                                               | C |
| LOC_Os02g45070.2 | PINHEAD, putative, expressed                                               | GO:0008152 | metabolic process                                                     | P |
| LOC_Os02g45070.2 | PINHEAD, putative, expressed                                               | GO:0000003 | reproduction                                                          | P |
| LOC_Os02g45070.2 | PINHEAD, putative, expressed                                               | GO:0009791 | post-embryonic development                                            | P |
| LOC_Os02g45070.2 | PINHEAD, putative, expressed                                               | GO:0009790 | embryo development                                                    | P |
| LOC_Os02g45570.1 | growth regulating factor protein, putative, expressed                      | GO:0005634 | nucleus                                                               | C |
| LOC_Os02g45570.1 | growth regulating factor protein, putative, expressed                      | GO:0007275 | multicellular organismal development                                  | P |
| LOC_Os02g45570.2 | growth regulating factor protein, putative, expressed                      | GO:0005634 | nucleus                                                               | C |
| LOC_Os02g45570.2 | growth regulating factor protein, putative, expressed                      | GO:0007275 | multicellular organismal development                                  | P |
| LOC_Os02g47280.1 | growth-regulating factor, putative, expressed                              | GO:0005634 | nucleus                                                               | C |
| LOC_Os02g47280.1 | growth-regulating factor, putative, expressed                              | GO:0007275 | multicellular organismal development                                  | P |
| LOC_Os02g47280.2 | growth-regulating factor, putative, expressed                              | GO:0005634 | nucleus                                                               | C |
| LOC_Os02g47280.2 | growth-regulating factor, putative, expressed                              | GO:0007275 | multicellular organismal development                                  | P |
| LOC_Os02g52180.1 | plastocyanin-like domain containing protein, putative, expressed           | GO:0003674 | molecular_function                                                    | F |
| LOC_Os02g52180.1 | plastocyanin-like domain containing protein, putative, expressed           | GO:0005488 | binding                                                               | F |
| LOC_Os02g52180.1 | plastocyanin-like domain containing protein, putative, expressed           | GO:0016020 | membrane                                                              | C |
| LOC_Os02g53000.2 | lysM domain-containing GPI-anchored protein precursor, putative, expressed | GO:0003674 | molecular_function                                                    | F |
| LOC_Os02g53000.2 | lysM domain-containing GPI-anchored protein precursor, putative, expressed | GO:0009056 | catabolic process                                                     | P |
| LOC_Os02g53000.2 | lysM domain-containing GPI-anchored protein precursor, putative, expressed | GO:0005886 | plasma membrane                                                       | C |
| LOC_Os02g53000.2 | lysM domain-containing GPI-anchored protein precursor, putative, expressed | GO:0016020 | membrane                                                              | C |
| LOC_Os03g01890.1 | START domain containing protein, expressed                                 | GO:0007275 | multicellular organismal development                                  | P |
| LOC_Os03g01890.1 | START domain containing protein, expressed                                 | GO:0003677 | DNA binding                                                           | F |
| LOC_Os03g01890.1 | START domain containing protein, expressed                                 | GO:0005634 | nucleus                                                               | C |
| LOC_Os03g01890.1 | START domain containing protein, expressed                                 | GO:0030154 | cell differentiation                                                  | P |
| LOC_Os03g01890.1 | START domain containing protein, expressed                                 | GO:0009058 | biosynthetic process                                                  | P |
| LOC_Os03g01890.1 | START domain containing protein, expressed                                 | GO:0006139 | nucleobase, nucleoside, nucleotide and nucleic acid metabolic process | P |
| LOC_Os03g01890.1 | START domain containing protein, expressed                                 | GO:0009653 | anatomical structure morphogenesis                                    | P |
| LOC_Os03g01890.1 | START domain containing protein, expressed                                 | GO:0008289 | lipid binding                                                         | F |
| LOC_Os03g01890.1 | START domain containing protein, expressed                                 | GO:0003700 | sequence-specific DNA binding transcription factor activity           | F |
| LOC_Os03g01890.2 | START domain containing protein, expressed                                 | GO:0007275 | multicellular organismal development                                  | P |
| LOC_Os03g01890.2 | START domain containing protein, expressed                                 | GO:0003677 | DNA binding                                                           | F |
| LOC_Os03g01890.2 | START domain containing protein, expressed                                 | GO:0005634 | nucleus                                                               | C |
| LOC_Os03g01890.2 | START domain containing protein, expressed                                 | GO:0030154 | cell differentiation                                                  | P |
| LOC_Os03g01890.2 | START domain containing protein, expressed                                 | GO:0009058 | biosynthetic process                                                  | P |
| LOC_Os03g01890.2 | START domain containing protein, expressed                                 | GO:0006139 | nucleobase, nucleoside, nucleotide and nucleic acid metabolic process | P |
| LOC_Os03g01890.2 | START domain containing protein, expressed                                 | GO:0009653 | anatomical structure morphogenesis                                    | P |
| LOC_Os03g01890.2 | START domain containing protein, expressed                                 | GO:0008289 | lipid binding                                                         | F |
| LOC_Os03g01890.2 | START domain containing protein, expressed                                 | GO:0003700 | sequence-specific DNA binding transcription factor activity           | F |
| LOC_Os03g31180.2 | diacylglycerol kinase 1, putative, expressed                               | GO:0016301 | kinase activity                                                       | F |
| LOC_Os03g31180.2 | diacylglycerol kinase 1, putative, expressed                               | GO:0005575 | cellular_component                                                    | C |
| LOC_Os03g31180.2 | diacylglycerol kinase 1, putative, expressed                               | GO:0007165 | signal transduction                                                   | P |
| LOC_Os03g31180.2 | diacylglycerol kinase 1, putative, expressed                               | GO:0006464 | protein modification process                                          | P |
| LOC_Os03g31180.2 | diacylglycerol kinase 1, putative, expressed                               | GO:0005488 | binding                                                               | F |
| LOC_Os03g39610.1 | chlorophyll A-B binding protein, putative, expressed                       | GO:0016020 | membrane                                                              | C |
| LOC_Os03g39610.1 | chlorophyll A-B binding protein, putative, expressed                       | GO:0009536 | plastid                                                               | C |
| LOC_Os03g39610.1 | chlorophyll A-B binding protein, putative, expressed                       | GO:0009579 | thylakoid                                                             | C |
| LOC_Os03g39610.1 | chlorophyll A-B binding protein, putative, expressed                       | GO:0009628 | response to abiotic stimulus                                          | P |
| LOC_Os03g39610.1 | chlorophyll A-B binding protein, putative, expressed                       | GO:0005622 | intracellular                                                         | C |
| LOC_Os03g39610.1 | chlorophyll A-B binding protein, putative, expressed                       | GO:0005488 | binding                                                               | F |
| LOC_Os03g39610.1 | chlorophyll A-B binding protein, putative, expressed                       | GO:0015979 | photosynthesis                                                        | P |



|                  |                                                        |            |                                                                       |   |
|------------------|--------------------------------------------------------|------------|-----------------------------------------------------------------------|---|
| LOC_Os03g39610.2 | chlorophyll A-B binding protein, putative, expressed   | GO:0009536 | plastid                                                               | C |
| LOC_Os03g39610.2 | chlorophyll A-B binding protein, putative, expressed   | GO:0016020 | membrane                                                              | C |
| LOC_Os03g39610.2 | chlorophyll A-B binding protein, putative, expressed   | GO:0009579 | thylakoid                                                             | C |
| LOC_Os03g39610.2 | chlorophyll A-B binding protein, putative, expressed   | GO:0005773 | vacuole                                                               | C |
| LOC_Os03g39610.2 | chlorophyll A-B binding protein, putative, expressed   | GO:0006091 | generation of precursor metabolites and energy                        | P |
| LOC_Os03g39610.2 | chlorophyll A-B binding protein, putative, expressed   | GO:0015979 | photosynthesis                                                        | P |
| LOC_Os03g39610.2 | chlorophyll A-B binding protein, putative, expressed   | GO:0005622 | intracellular                                                         | C |
| LOC_Os03g39610.2 | chlorophyll A-B binding protein, putative, expressed   | GO:0005488 | binding                                                               | F |
| LOC_Os03g43930.1 | START domain containing protein, expressed             | GO:0003677 | DNA binding                                                           | F |
| LOC_Os03g43930.1 | START domain containing protein, expressed             | GO:0005634 | nucleus                                                               | C |
| LOC_Os03g43930.1 | START domain containing protein, expressed             | GO:0007275 | multicellular organismal development                                  | P |
| LOC_Os03g43930.1 | START domain containing protein, expressed             | GO:0009058 | biosynthetic process                                                  | P |
| LOC_Os03g43930.1 | START domain containing protein, expressed             | GO:0006139 | nucleobase, nucleoside, nucleotide and nucleic acid metabolic process | P |
| LOC_Os03g43930.1 | START domain containing protein, expressed             | GO:0009653 | anatomical structure morphogenesis                                    | P |
| LOC_Os03g43930.1 | START domain containing protein, expressed             | GO:0000003 | reproduction                                                          | P |
| LOC_Os03g43930.1 | START domain containing protein, expressed             | GO:0009791 | post-embryonic development                                            | P |
| LOC_Os03g43930.1 | START domain containing protein, expressed             | GO:0009790 | embryo development                                                    | P |
| LOC_Os03g43930.1 | START domain containing protein, expressed             | GO:0009908 | flower development                                                    | P |
| LOC_Os03g43930.1 | START domain containing protein, expressed             | GO:0003700 | sequence-specific DNA binding transcription factor activity           | F |
| LOC_Os03g43930.2 | START domain containing protein, expressed             | GO:0003677 | DNA binding                                                           | F |
| LOC_Os03g43930.2 | START domain containing protein, expressed             | GO:0005634 | nucleus                                                               | C |
| LOC_Os03g43930.2 | START domain containing protein, expressed             | GO:0007275 | multicellular organismal development                                  | P |
| LOC_Os03g43930.2 | START domain containing protein, expressed             | GO:0009058 | biosynthetic process                                                  | P |
| LOC_Os03g43930.2 | START domain containing protein, expressed             | GO:0006139 | nucleobase, nucleoside, nucleotide and nucleic acid metabolic process | P |
| LOC_Os03g43930.2 | START domain containing protein, expressed             | GO:0009653 | anatomical structure morphogenesis                                    | P |
| LOC_Os03g43930.2 | START domain containing protein, expressed             | GO:0000003 | reproduction                                                          | P |
| LOC_Os03g43930.2 | START domain containing protein, expressed             | GO:0009791 | post-embryonic development                                            | P |
| LOC_Os03g43930.2 | START domain containing protein, expressed             | GO:0009790 | embryo development                                                    | P |
| LOC_Os03g43930.2 | START domain containing protein, expressed             | GO:0009908 | flower development                                                    | P |
| LOC_Os03g43930.2 | START domain containing protein, expressed             | GO:0003700 | sequence-specific DNA binding transcription factor activity           | F |
| LOC_Os03g44200.1 | beclin-1, putative, expressed                          | GO:0006950 | response to stress                                                    | P |
| LOC_Os03g44200.1 | beclin-1, putative, expressed                          | GO:0009607 | response to biotic stimulus                                           | P |
| LOC_Os03g44200.1 | beclin-1, putative, expressed                          | GO:0009856 | pollination                                                           | P |
| LOC_Os03g44200.1 | beclin-1, putative, expressed                          | GO:0009791 | post-embryonic development                                            | P |
| LOC_Os03g44200.1 | beclin-1, putative, expressed                          | GO:0003674 | molecular_function                                                    | F |
| LOC_Os03g44200.1 | beclin-1, putative, expressed                          | GO:0006810 | transport                                                             | P |
| LOC_Os03g44200.1 | beclin-1, putative, expressed                          | GO:0009987 | cellular process                                                      | P |
| LOC_Os03g44200.1 | beclin-1, putative, expressed                          | GO:0009056 | catabolic process                                                     | P |
| LOC_Os03g44200.1 | beclin-1, putative, expressed                          | GO:0005737 | cytoplasm                                                             | C |
| LOC_Os03g44200.1 | beclin-1, putative, expressed                          | GO:0009991 | response to extracellular stimulus                                    | P |
| LOC_Os03g44200.1 | beclin-1, putative, expressed                          | GO:0016043 | cellular component organization                                       | P |
| LOC_Os03g44200.1 | beclin-1, putative, expressed                          | GO:0007154 | cell communication                                                    | P |
| LOC_Os03g47140.1 | growth regulating factor protein, putative, expressed  | GO:0005634 | nucleus                                                               | C |
| LOC_Os03g47140.1 | growth regulating factor protein, putative, expressed  | GO:0005515 | protein binding                                                       | F |
| LOC_Os03g47140.1 | growth regulating factor protein, putative, expressed  | GO:0007275 | multicellular organismal development                                  | P |
| LOC_Os03g50070.1 | DUF1295 domain containing protein, putative, expressed | GO:0003824 | catalytic activity                                                    | F |
| LOC_Os03g50070.1 | DUF1295 domain containing protein, putative, expressed | GO:0016020 | membrane                                                              | C |
| LOC_Os03g50070.1 | DUF1295 domain containing protein, putative, expressed | GO:0005773 | vacuole                                                               | C |
| LOC_Os03g50070.1 | DUF1295 domain containing protein, putative, expressed | GO:0005575 | cellular_component                                                    | C |
| LOC_Os03g50070.1 | DUF1295 domain containing protein, putative, expressed | GO:0008152 | metabolic process                                                     | P |
| LOC_Os03g50070.1 | DUF1295 domain containing protein, putative, expressed | GO:0005886 | plasma membrane                                                       | C |
| LOC_Os03g50070.1 | DUF1295 domain containing protein, putative, expressed | GO:0006629 | lipid metabolic process                                               | P |

|                  |                                                               |            |                                                                       |   |
|------------------|---------------------------------------------------------------|------------|-----------------------------------------------------------------------|---|
| LOC_Os03g52010.1 | lecithin cholesterol acyltransferase, putative, expressed     | GO:0016020 | membrane                                                              | C |
| LOC_Os03g52010.1 | lecithin cholesterol acyltransferase, putative, expressed     | GO:0005773 | vacuole                                                               | C |
| LOC_Os03g52010.1 | lecithin cholesterol acyltransferase, putative, expressed     | GO:0016740 | transferase activity                                                  | F |
| LOC_Os03g52010.1 | lecithin cholesterol acyltransferase, putative, expressed     | GO:0006629 | lipid metabolic process                                               | P |
| LOC_Os04g02640.1 | 3-ketoacyl-CoA synthase 6, putative, expressed                | GO:0016043 | cellular component organization                                       | P |
| LOC_Os04g02640.1 | 3-ketoacyl-CoA synthase 6, putative, expressed                | GO:0009653 | anatomical structure morphogenesis                                    | P |
| LOC_Os04g02640.1 | 3-ketoacyl-CoA synthase 6, putative, expressed                | GO:0016049 | cell growth                                                           | P |
| LOC_Os04g02640.1 | 3-ketoacyl-CoA synthase 6, putative, expressed                | GO:0009987 | cellular process                                                      | P |
| LOC_Os04g02640.1 | 3-ketoacyl-CoA synthase 6, putative, expressed                | GO:0006629 | lipid metabolic process                                               | P |
| LOC_Os04g02640.1 | 3-ketoacyl-CoA synthase 6, putative, expressed                | GO:0005783 | endoplasmic reticulum                                                 | C |
| LOC_Os04g02640.1 | 3-ketoacyl-CoA synthase 6, putative, expressed                | GO:0007275 | multicellular organismal development                                  | P |
| LOC_Os04g02640.1 | 3-ketoacyl-CoA synthase 6, putative, expressed                | GO:0008152 | metabolic process                                                     | P |
| LOC_Os04g02640.1 | 3-ketoacyl-CoA synthase 6, putative, expressed                | GO:0006950 | response to stress                                                    | P |
| LOC_Os04g02640.1 | 3-ketoacyl-CoA synthase 6, putative, expressed                | GO:0009628 | response to abiotic stimulus                                          | P |
| LOC_Os04g02640.1 | 3-ketoacyl-CoA synthase 6, putative, expressed                | GO:0009058 | biosynthetic process                                                  | P |
| LOC_Os04g02640.1 | 3-ketoacyl-CoA synthase 6, putative, expressed                | GO:0003824 | catalytic activity                                                    | F |
| LOC_Os04g02640.1 | 3-ketoacyl-CoA synthase 6, putative, expressed                | GO:0016740 | transferase activity                                                  | F |
| LOC_Os04g36830.1 | DUF567 domain containing protein, putative, expressed         | GO:0003674 | molecular_function                                                    | F |
| LOC_Os04g36830.1 | DUF567 domain containing protein, putative, expressed         | GO:0005575 | cellular_component                                                    | C |
| LOC_Os04g36830.1 | DUF567 domain containing protein, putative, expressed         | GO:0008150 | biological_process                                                    | P |
| LOC_Os04g38450.1 | gamma-glutamyltranspeptidase 1 precursor, putative, expressed | GO:0005576 | extracellular region                                                  | C |
| LOC_Os04g38450.1 | gamma-glutamyltranspeptidase 1 precursor, putative, expressed | GO:0008152 | metabolic process                                                     | P |
| LOC_Os04g38450.1 | gamma-glutamyltranspeptidase 1 precursor, putative, expressed | GO:0005575 | cellular_component                                                    | C |
| LOC_Os04g38450.1 | gamma-glutamyltranspeptidase 1 precursor, putative, expressed | GO:0006950 | response to stress                                                    | P |
| LOC_Os04g38450.1 | gamma-glutamyltranspeptidase 1 precursor, putative, expressed | GO:0005618 | cell wall                                                             | C |
| LOC_Os04g38450.1 | gamma-glutamyltranspeptidase 1 precursor, putative, expressed | GO:0016740 | transferase activity                                                  | F |
| LOC_Os04g38450.1 | gamma-glutamyltranspeptidase 1 precursor, putative, expressed | GO:0009056 | catabolic process                                                     | P |
| LOC_Os04g38450.1 | gamma-glutamyltranspeptidase 1 precursor, putative, expressed | GO:0009987 | cellular process                                                      | P |
| LOC_Os04g43910.1 | auxin response factor, putative, expressed                    | GO:0000003 | reproduction                                                          | P |
| LOC_Os04g43910.1 | auxin response factor, putative, expressed                    | GO:0009719 | response to endogenous stimulus                                       | P |
| LOC_Os04g43910.1 | auxin response factor, putative, expressed                    | GO:0007165 | signal transduction                                                   | P |
| LOC_Os04g43910.1 | auxin response factor, putative, expressed                    | GO:0009058 | biosynthetic process                                                  | P |
| LOC_Os04g43910.1 | auxin response factor, putative, expressed                    | GO:0006139 | nucleobase, nucleoside, nucleotide and nucleic acid metabolic process | P |
| LOC_Os04g43910.1 | auxin response factor, putative, expressed                    | GO:0007275 | multicellular organismal development                                  | P |
| LOC_Os04g43910.1 | auxin response factor, putative, expressed                    | GO:0003700 | sequence-specific DNA binding transcription factor activity           | F |
| LOC_Os04g43910.1 | auxin response factor, putative, expressed                    | GO:0009908 | flower development                                                    | P |
| LOC_Os04g43910.1 | auxin response factor, putative, expressed                    | GO:0005634 | nucleus                                                               | C |
| LOC_Os04g43910.1 | auxin response factor, putative, expressed                    | GO:0008150 | biological_process                                                    | P |
| LOC_Os04g43910.1 | auxin response factor, putative, expressed                    | GO:0003723 | RNA binding                                                           | F |
| LOC_Os04g43910.1 | auxin response factor, putative, expressed                    | GO:0009987 | cellular process                                                      | P |
| LOC_Os04g43910.1 | auxin response factor, putative, expressed                    | GO:0040007 | growth                                                                | P |
| LOC_Os04g43910.1 | auxin response factor, putative, expressed                    | GO:0019748 | secondary metabolic process                                           | P |
| LOC_Os04g46860.1 | scarecrow, putative, expressed                                | GO:0008150 | biological_process                                                    | P |
| LOC_Os04g46860.1 | scarecrow, putative, expressed                                | GO:0030154 | cell differentiation                                                  | P |
| LOC_Os04g46860.1 | scarecrow, putative, expressed                                | GO:0009058 | biosynthetic process                                                  | P |
| LOC_Os04g46860.1 | scarecrow, putative, expressed                                | GO:0006139 | nucleobase, nucleoside, nucleotide and nucleic acid metabolic process | P |
| LOC_Os04g46860.1 | scarecrow, putative, expressed                                | GO:0016043 | cellular component organization                                       | P |
| LOC_Os04g46860.1 | scarecrow, putative, expressed                                | GO:0009653 | anatomical structure morphogenesis                                    | P |
| LOC_Os04g46860.1 | scarecrow, putative, expressed                                | GO:0016049 | cell growth                                                           | P |
| LOC_Os04g46860.1 | scarecrow, putative, expressed                                | GO:0007275 | multicellular organismal development                                  | P |
| LOC_Os04g46860.1 | scarecrow, putative, expressed                                | GO:0005515 | protein binding                                                       | F |
| LOC_Os04g46860.1 | scarecrow, putative, expressed                                | GO:0009987 | cellular process                                                      | P |

|                  |                                               |            |                                                             |   |
|------------------|-----------------------------------------------|------------|-------------------------------------------------------------|---|
| LOC_Os04g46860.1 | scarecrow, putative, expressed                | GO:0003700 | sequence-specific DNA binding transcription factor activity | F |
| LOC_Os04g46860.1 | scarecrow, putative, expressed                | GO:0009536 | plastid                                                     | C |
| LOC_Os04g47870.1 | PINHEAD, putative, expressed                  | GO:0009719 | response to endogenous stimulus                             | P |
| LOC_Os04g47870.1 | PINHEAD, putative, expressed                  | GO:0006950 | response to stress                                          | P |
| LOC_Os04g47870.1 | PINHEAD, putative, expressed                  | GO:0009607 | response to biotic stimulus                                 | P |
| LOC_Os04g47870.1 | PINHEAD, putative, expressed                  | GO:0009653 | anatomical structure morphogenesis                          | P |
| LOC_Os04g47870.1 | PINHEAD, putative, expressed                  | GO:0007275 | multicellular organismal development                        | P |
| LOC_Os04g47870.1 | PINHEAD, putative, expressed                  | GO:0005737 | cytoplasm                                                   | C |
| LOC_Os04g47870.1 | PINHEAD, putative, expressed                  | GO:0004518 | nuclease activity                                           | F |
| LOC_Os04g47870.1 | PINHEAD, putative, expressed                  | GO:0040029 | regulation of gene expression, epigenetic                   | P |
| LOC_Os04g47870.1 | PINHEAD, putative, expressed                  | GO:0009987 | cellular process                                            | P |
| LOC_Os04g47870.1 | PINHEAD, putative, expressed                  | GO:0030154 | cell differentiation                                        | P |
| LOC_Os04g47870.1 | PINHEAD, putative, expressed                  | GO:0005515 | protein binding                                             | F |
| LOC_Os04g47870.1 | PINHEAD, putative, expressed                  | GO:0009628 | response to abiotic stimulus                                | P |
| LOC_Os04g47870.1 | PINHEAD, putative, expressed                  | GO:0005829 | cytosol                                                     | C |
| LOC_Os04g47870.1 | PINHEAD, putative, expressed                  | GO:0003723 | RNA binding                                                 | F |
| LOC_Os04g47870.1 | PINHEAD, putative, expressed                  | GO:0005634 | nucleus                                                     | C |
| LOC_Os04g47870.1 | PINHEAD, putative, expressed                  | GO:0008152 | metabolic process                                           | P |
| LOC_Os04g47870.1 | PINHEAD, putative, expressed                  | GO:0000003 | reproduction                                                | P |
| LOC_Os04g47870.1 | PINHEAD, putative, expressed                  | GO:0009791 | post-embryonic development                                  | P |
| LOC_Os04g47870.1 | PINHEAD, putative, expressed                  | GO:0009790 | embryo development                                          | P |
| LOC_Os04g47870.2 | PINHEAD, putative, expressed                  | GO:0009719 | response to endogenous stimulus                             | P |
| LOC_Os04g47870.2 | PINHEAD, putative, expressed                  | GO:0006950 | response to stress                                          | P |
| LOC_Os04g47870.2 | PINHEAD, putative, expressed                  | GO:0009607 | response to biotic stimulus                                 | P |
| LOC_Os04g47870.2 | PINHEAD, putative, expressed                  | GO:0009653 | anatomical structure morphogenesis                          | P |
| LOC_Os04g47870.2 | PINHEAD, putative, expressed                  | GO:0007275 | multicellular organismal development                        | P |
| LOC_Os04g47870.2 | PINHEAD, putative, expressed                  | GO:0005737 | cytoplasm                                                   | C |
| LOC_Os04g47870.2 | PINHEAD, putative, expressed                  | GO:0004518 | nuclease activity                                           | F |
| LOC_Os04g47870.2 | PINHEAD, putative, expressed                  | GO:0040029 | regulation of gene expression, epigenetic                   | P |
| LOC_Os04g47870.2 | PINHEAD, putative, expressed                  | GO:0009987 | cellular process                                            | P |
| LOC_Os04g47870.2 | PINHEAD, putative, expressed                  | GO:0030154 | cell differentiation                                        | P |
| LOC_Os04g47870.2 | PINHEAD, putative, expressed                  | GO:0005515 | protein binding                                             | F |
| LOC_Os04g47870.2 | PINHEAD, putative, expressed                  | GO:0009628 | response to abiotic stimulus                                | P |
| LOC_Os04g47870.2 | PINHEAD, putative, expressed                  | GO:0005829 | cytosol                                                     | C |
| LOC_Os04g47870.2 | PINHEAD, putative, expressed                  | GO:0003723 | RNA binding                                                 | F |
| LOC_Os04g47870.2 | PINHEAD, putative, expressed                  | GO:0005634 | nucleus                                                     | C |
| LOC_Os04g47870.2 | PINHEAD, putative, expressed                  | GO:0008152 | metabolic process                                           | P |
| LOC_Os04g47870.2 | PINHEAD, putative, expressed                  | GO:0000003 | reproduction                                                | P |
| LOC_Os04g47870.2 | PINHEAD, putative, expressed                  | GO:0009791 | post-embryonic development                                  | P |
| LOC_Os04g47870.2 | PINHEAD, putative, expressed                  | GO:0009790 | embryo development                                          | P |
| LOC_Os04g51190.1 | growth-regulating factor, putative, expressed | GO:0005634 | nucleus                                                     | C |
| LOC_Os04g51190.1 | growth-regulating factor, putative, expressed | GO:0007275 | multicellular organismal development                        | P |
| LOC_Os04g51190.2 | growth-regulating factor, putative, expressed | GO:0005634 | nucleus                                                     | C |
| LOC_Os04g51190.2 | growth-regulating factor, putative, expressed | GO:0007275 | multicellular organismal development                        | P |
| LOC_Os04g51190.3 | growth-regulating factor, putative, expressed | GO:0005634 | nucleus                                                     | C |
| LOC_Os04g51190.3 | growth-regulating factor, putative, expressed | GO:0007275 | multicellular organismal development                        | P |
| LOC_Os04g55290.1 | G10 protein, putative, expressed              | GO:0005634 | nucleus                                                     | C |
| LOC_Os04g55290.1 | G10 protein, putative, expressed              | GO:0005829 | cytosol                                                     | C |
| LOC_Os04g55290.1 | G10 protein, putative, expressed              | GO:0008150 | biological_process                                          | P |
| LOC_Os04g55290.2 | G10 protein, putative, expressed              | GO:0005634 | nucleus                                                     | C |
| LOC_Os04g55290.2 | G10 protein, putative, expressed              | GO:0005829 | cytosol                                                     | C |
| LOC_Os04g55290.2 | G10 protein, putative, expressed              | GO:0008150 | biological_process                                          | P |

|                  |                                                           |            |                                                                       |   |
|------------------|-----------------------------------------------------------|------------|-----------------------------------------------------------------------|---|
| LOC_Os04g55290.3 | G10 protein, putative, expressed                          | GO:0005634 | nucleus                                                               | C |
| LOC_Os04g55290.3 | G10 protein, putative, expressed                          | GO:0005829 | cytosol                                                               | C |
| LOC_Os04g55290.3 | G10 protein, putative, expressed                          | GO:0008150 | biological_process                                                    | P |
| LOC_Os04g55290.4 | G10 protein, putative, expressed                          | GO:0005634 | nucleus                                                               | C |
| LOC_Os04g55290.4 | G10 protein, putative, expressed                          | GO:0005829 | cytosol                                                               | C |
| LOC_Os04g55290.4 | G10 protein, putative, expressed                          | GO:0008150 | biological_process                                                    | P |
| LOC_Os04g55290.5 | G10 protein, putative, expressed                          | GO:0005634 | nucleus                                                               | C |
| LOC_Os04g55290.5 | G10 protein, putative, expressed                          | GO:0005829 | cytosol                                                               | C |
| LOC_Os04g55290.5 | G10 protein, putative, expressed                          | GO:0008150 | biological_process                                                    | P |
| LOC_Os04g55650.1 | oryzain alpha chain precursor, putative, expressed        | GO:0005576 | extracellular region                                                  | C |
| LOC_Os04g55650.1 | oryzain alpha chain precursor, putative, expressed        | GO:0008152 | metabolic process                                                     | P |
| LOC_Os04g55650.1 | oryzain alpha chain precursor, putative, expressed        | GO:0006950 | response to stress                                                    | P |
| LOC_Os04g55650.1 | oryzain alpha chain precursor, putative, expressed        | GO:0009628 | response to abiotic stimulus                                          | P |
| LOC_Os04g55650.1 | oryzain alpha chain precursor, putative, expressed        | GO:0005575 | cellular_component                                                    | C |
| LOC_Os04g55650.1 | oryzain alpha chain precursor, putative, expressed        | GO:0005773 | vacuole                                                               | C |
| LOC_Os04g55650.1 | oryzain alpha chain precursor, putative, expressed        | GO:0016787 | hydrolase activity                                                    | F |
| LOC_Os04g55650.1 | oryzain alpha chain precursor, putative, expressed        | GO:0005515 | protein binding                                                       | F |
| LOC_Os04g55650.1 | oryzain alpha chain precursor, putative, expressed        | GO:0009536 | plastid                                                               | C |
| LOC_Os04g55650.2 | oryzain alpha chain precursor, putative, expressed        | GO:0005576 | extracellular region                                                  | C |
| LOC_Os04g55650.2 | oryzain alpha chain precursor, putative, expressed        | GO:0008152 | metabolic process                                                     | P |
| LOC_Os04g55650.2 | oryzain alpha chain precursor, putative, expressed        | GO:0006950 | response to stress                                                    | P |
| LOC_Os04g55650.2 | oryzain alpha chain precursor, putative, expressed        | GO:0009628 | response to abiotic stimulus                                          | P |
| LOC_Os04g55650.2 | oryzain alpha chain precursor, putative, expressed        | GO:0005575 | cellular_component                                                    | C |
| LOC_Os04g55650.2 | oryzain alpha chain precursor, putative, expressed        | GO:0005773 | vacuole                                                               | C |
| LOC_Os04g55650.2 | oryzain alpha chain precursor, putative, expressed        | GO:0016787 | hydrolase activity                                                    | F |
| LOC_Os04g55650.2 | oryzain alpha chain precursor, putative, expressed        | GO:0005515 | protein binding                                                       | F |
| LOC_Os04g55650.2 | oryzain alpha chain precursor, putative, expressed        | GO:0009536 | plastid                                                               | C |
| LOC_Os04g57610.1 | auxin response factor, putative, expressed                | GO:0009908 | flower development                                                    | P |
| LOC_Os04g57610.1 | auxin response factor, putative, expressed                | GO:0009719 | response to endogenous stimulus                                       | P |
| LOC_Os04g57610.1 | auxin response factor, putative, expressed                | GO:0005634 | nucleus                                                               | C |
| LOC_Os04g57610.1 | auxin response factor, putative, expressed                | GO:0000003 | reproduction                                                          | P |
| LOC_Os04g57610.1 | auxin response factor, putative, expressed                | GO:0009058 | biosynthetic process                                                  | P |
| LOC_Os04g57610.1 | auxin response factor, putative, expressed                | GO:0006139 | nucleobase, nucleoside, nucleotide and nucleic acid metabolic process | P |
| LOC_Os04g57610.1 | auxin response factor, putative, expressed                | GO:0003700 | sequence-specific DNA binding transcription factor activity           | F |
| LOC_Os04g57610.3 | auxin response factor, putative, expressed                | GO:0009908 | flower development                                                    | P |
| LOC_Os04g57610.3 | auxin response factor, putative, expressed                | GO:0009719 | response to endogenous stimulus                                       | P |
| LOC_Os04g57610.3 | auxin response factor, putative, expressed                | GO:0005634 | nucleus                                                               | C |
| LOC_Os04g57610.3 | auxin response factor, putative, expressed                | GO:0000003 | reproduction                                                          | P |
| LOC_Os04g57610.3 | auxin response factor, putative, expressed                | GO:0009058 | biosynthetic process                                                  | P |
| LOC_Os04g57610.3 | auxin response factor, putative, expressed                | GO:0006139 | nucleobase, nucleoside, nucleotide and nucleic acid metabolic process | P |
| LOC_Os04g57610.3 | auxin response factor, putative, expressed                | GO:0003700 | sequence-specific DNA binding transcription factor activity           | F |
| LOC_Os05g10670.1 | zinc finger CCCH type family protein, putative, expressed | GO:0006950 | response to stress                                                    | P |
| LOC_Os05g10670.1 | zinc finger CCCH type family protein, putative, expressed | GO:0009058 | biosynthetic process                                                  | P |
| LOC_Os05g10670.1 | zinc finger CCCH type family protein, putative, expressed | GO:0006139 | nucleobase, nucleoside, nucleotide and nucleic acid metabolic process | P |
| LOC_Os05g10670.1 | zinc finger CCCH type family protein, putative, expressed | GO:0003700 | sequence-specific DNA binding transcription factor activity           | F |
| LOC_Os05g10670.1 | zinc finger CCCH type family protein, putative, expressed | GO:0005886 | plasma membrane                                                       | C |
| LOC_Os05g10670.1 | zinc finger CCCH type family protein, putative, expressed | GO:0003676 | nucleic acid binding                                                  | F |
| LOC_Os05g11560.2 | aquaporin protein, putative, expressed                    | GO:0006810 | transport                                                             | P |
| LOC_Os05g11560.2 | aquaporin protein, putative, expressed                    | GO:0005215 | transporter activity                                                  | F |
| LOC_Os05g11560.2 | aquaporin protein, putative, expressed                    | GO:0016020 | membrane                                                              | C |
| LOC_Os05g11560.2 | aquaporin protein, putative, expressed                    | GO:0009987 | cellular process                                                      | P |
| LOC_Os05g11560.2 | aquaporin protein, putative, expressed                    | GO:0008150 | biological_process                                                    | P |

|                  |                                                                       |            |                                                                       |   |
|------------------|-----------------------------------------------------------------------|------------|-----------------------------------------------------------------------|---|
| LOC_Os05g11560.2 | aquaporin protein, putative, expressed                                | GO:0005886 | plasma membrane                                                       | C |
| LOC_Os05g34290.1 | glutathione gamma-glutamylcysteinyltransferase 1, putative, expressed | GO:0006810 | transport                                                             | P |
| LOC_Os05g34290.1 | glutathione gamma-glutamylcysteinyltransferase 1, putative, expressed | GO:0009987 | cellular process                                                      | P |
| LOC_Os05g34290.1 | glutathione gamma-glutamylcysteinyltransferase 1, putative, expressed | GO:0005488 | binding                                                               | F |
| LOC_Os05g34290.1 | glutathione gamma-glutamylcysteinyltransferase 1, putative, expressed | GO:0008152 | metabolic process                                                     | P |
| LOC_Os05g34290.1 | glutathione gamma-glutamylcysteinyltransferase 1, putative, expressed | GO:0005215 | transporter activity                                                  | F |
| LOC_Os05g34290.1 | glutathione gamma-glutamylcysteinyltransferase 1, putative, expressed | GO:0006950 | response to stress                                                    | P |
| LOC_Os05g34290.1 | glutathione gamma-glutamylcysteinyltransferase 1, putative, expressed | GO:0009607 | response to biotic stimulus                                           | P |
| LOC_Os05g34290.1 | glutathione gamma-glutamylcysteinyltransferase 1, putative, expressed | GO:0005975 | carbohydrate metabolic process                                        | P |
| LOC_Os05g34290.1 | glutathione gamma-glutamylcysteinyltransferase 1, putative, expressed | GO:0009056 | catabolic process                                                     | P |
| LOC_Os05g34290.1 | glutathione gamma-glutamylcysteinyltransferase 1, putative, expressed | GO:0019748 | secondary metabolic process                                           | P |
| LOC_Os05g34290.1 | glutathione gamma-glutamylcysteinyltransferase 1, putative, expressed | GO:0008150 | biological_process                                                    | P |
| LOC_Os05g34290.1 | glutathione gamma-glutamylcysteinyltransferase 1, putative, expressed | GO:0005829 | cytosol                                                               | C |
| LOC_Os05g34290.1 | glutathione gamma-glutamylcysteinyltransferase 1, putative, expressed | GO:0016787 | hydrolase activity                                                    | F |
| LOC_Os05g34290.1 | glutathione gamma-glutamylcysteinyltransferase 1, putative, expressed | GO:0006139 | nucleobase, nucleoside, nucleotide and nucleic acid metabolic process | P |
| LOC_Os05g34290.1 | glutathione gamma-glutamylcysteinyltransferase 1, putative, expressed | GO:0009058 | biosynthetic process                                                  | P |
| LOC_Os05g34290.1 | glutathione gamma-glutamylcysteinyltransferase 1, putative, expressed | GO:0016740 | transferase activity                                                  | F |
| LOC_Os05g43920.1 | auxin response factor 14, putative, expressed                         | GO:0009719 | response to endogenous stimulus                                       | P |
| LOC_Os05g43920.1 | auxin response factor 14, putative, expressed                         | GO:0003677 | DNA binding                                                           | F |
| LOC_Os05g43920.1 | auxin response factor 14, putative, expressed                         | GO:0005634 | nucleus                                                               | C |
| LOC_Os05g43920.1 | auxin response factor 14, putative, expressed                         | GO:0009058 | biosynthetic process                                                  | P |
| LOC_Os05g43920.1 | auxin response factor 14, putative, expressed                         | GO:0006139 | nucleobase, nucleoside, nucleotide and nucleic acid metabolic process | P |
| LOC_Os05g43920.1 | auxin response factor 14, putative, expressed                         | GO:0030154 | cell differentiation                                                  | P |
| LOC_Os05g43920.1 | auxin response factor 14, putative, expressed                         | GO:0003700 | sequence-specific DNA binding transcription factor activity           | F |
| LOC_Os05g43920.1 | auxin response factor 14, putative, expressed                         | GO:0009791 | post-embryonic development                                            | P |
| LOC_Os05g43920.1 | auxin response factor 14, putative, expressed                         | GO:0008152 | metabolic process                                                     | P |
| LOC_Os05g43920.1 | auxin response factor 14, putative, expressed                         | GO:0009987 | cellular process                                                      | P |
| LOC_Os05g48870.1 | auxin response factor 15, putative, expressed                         | GO:0009719 | response to endogenous stimulus                                       | P |
| LOC_Os05g48870.1 | auxin response factor 15, putative, expressed                         | GO:0003677 | DNA binding                                                           | F |
| LOC_Os05g48870.1 | auxin response factor 15, putative, expressed                         | GO:0005634 | nucleus                                                               | C |
| LOC_Os05g48870.1 | auxin response factor 15, putative, expressed                         | GO:0009058 | biosynthetic process                                                  | P |
| LOC_Os05g48870.1 | auxin response factor 15, putative, expressed                         | GO:0006139 | nucleobase, nucleoside, nucleotide and nucleic acid metabolic process | P |
| LOC_Os05g48870.1 | auxin response factor 15, putative, expressed                         | GO:0030154 | cell differentiation                                                  | P |
| LOC_Os05g48870.1 | auxin response factor 15, putative, expressed                         | GO:0003700 | sequence-specific DNA binding transcription factor activity           | F |
| LOC_Os05g48870.1 | auxin response factor 15, putative, expressed                         | GO:0009791 | post-embryonic development                                            | P |
| LOC_Os05g48870.1 | auxin response factor 15, putative, expressed                         | GO:0008152 | metabolic process                                                     | P |
| LOC_Os05g48870.1 | auxin response factor 15, putative, expressed                         | GO:0009987 | cellular process                                                      | P |
| LOC_Os06g01620.1 | scarecrow, putative, expressed                                        | GO:0008150 | biological_process                                                    | P |
| LOC_Os06g01620.1 | scarecrow, putative, expressed                                        | GO:0030154 | cell differentiation                                                  | P |
| LOC_Os06g01620.1 | scarecrow, putative, expressed                                        | GO:0009058 | biosynthetic process                                                  | P |
| LOC_Os06g01620.1 | scarecrow, putative, expressed                                        | GO:0006139 | nucleobase, nucleoside, nucleotide and nucleic acid metabolic process | P |
| LOC_Os06g01620.1 | scarecrow, putative, expressed                                        | GO:0016043 | cellular component organization                                       | P |
| LOC_Os06g01620.1 | scarecrow, putative, expressed                                        | GO:0009653 | anatomical structure morphogenesis                                    | P |
| LOC_Os06g01620.1 | scarecrow, putative, expressed                                        | GO:0016049 | cell growth                                                           | P |
| LOC_Os06g01620.1 | scarecrow, putative, expressed                                        | GO:0007275 | multicellular organismal development                                  | P |
| LOC_Os06g01620.1 | scarecrow, putative, expressed                                        | GO:0005515 | protein binding                                                       | F |
| LOC_Os06g01620.1 | scarecrow, putative, expressed                                        | GO:0009987 | cellular process                                                      | P |
| LOC_Os06g01620.1 | scarecrow, putative, expressed                                        | GO:0003700 | sequence-specific DNA binding transcription factor activity           | F |
| LOC_Os06g01620.1 | scarecrow, putative, expressed                                        | GO:0009536 | plastid                                                               | C |
| LOC_Os06g01950.1 | phosphoglycerate mutase, putative, expressed                          | GO:0005575 | cellular_component                                                    | C |
| LOC_Os06g01950.1 | phosphoglycerate mutase, putative, expressed                          | GO:0008152 | metabolic process                                                     | P |
| LOC_Os06g01950.1 | phosphoglycerate mutase, putative, expressed                          | GO:0003824 | catalytic activity                                                    | F |

|                  |                                                                  |            |                                                                       |   |
|------------------|------------------------------------------------------------------|------------|-----------------------------------------------------------------------|---|
| LOC_Os06g02560.1 | growth-regulating factor, putative, expressed                    | GO:0005634 | nucleus                                                               | C |
| LOC_Os06g02560.1 | growth-regulating factor, putative, expressed                    | GO:0007275 | multicellular organismal development                                  | P |
| LOC_Os06g02560.2 | growth-regulating factor, putative, expressed                    | GO:0005634 | nucleus                                                               | C |
| LOC_Os06g02560.2 | growth-regulating factor, putative, expressed                    | GO:0007275 | multicellular organismal development                                  | P |
| LOC_Os06g02560.3 | growth-regulating factor, putative, expressed                    | GO:0005634 | nucleus                                                               | C |
| LOC_Os06g02560.3 | growth-regulating factor, putative, expressed                    | GO:0007275 | multicellular organismal development                                  | P |
| LOC_Os06g05630.1 | GDSL-like lipase/acylhydrolase, putative, expressed              | GO:0005576 | extracellular region                                                  | C |
| LOC_Os06g05630.1 | GDSL-like lipase/acylhydrolase, putative, expressed              | GO:0008152 | metabolic process                                                     | P |
| LOC_Os06g05630.1 | GDSL-like lipase/acylhydrolase, putative, expressed              | GO:0005515 | protein binding                                                       | F |
| LOC_Os06g05630.1 | GDSL-like lipase/acylhydrolase, putative, expressed              | GO:0016787 | hydrolase activity                                                    | F |
| LOC_Os06g05630.1 | GDSL-like lipase/acylhydrolase, putative, expressed              | GO:0006629 | lipid metabolic process                                               | P |
| LOC_Os06g05630.2 | GDSL-like lipase/acylhydrolase, putative, expressed              | GO:0005576 | extracellular region                                                  | C |
| LOC_Os06g05630.2 | GDSL-like lipase/acylhydrolase, putative, expressed              | GO:0008152 | metabolic process                                                     | P |
| LOC_Os06g05630.2 | GDSL-like lipase/acylhydrolase, putative, expressed              | GO:0005515 | protein binding                                                       | F |
| LOC_Os06g05630.2 | GDSL-like lipase/acylhydrolase, putative, expressed              | GO:0016787 | hydrolase activity                                                    | F |
| LOC_Os06g05630.2 | GDSL-like lipase/acylhydrolase, putative, expressed              | GO:0006629 | lipid metabolic process                                               | P |
| LOC_Os06g05630.3 | GDSL-like lipase/acylhydrolase, putative, expressed              | GO:0005576 | extracellular region                                                  | C |
| LOC_Os06g05630.3 | GDSL-like lipase/acylhydrolase, putative, expressed              | GO:0008152 | metabolic process                                                     | P |
| LOC_Os06g05630.3 | GDSL-like lipase/acylhydrolase, putative, expressed              | GO:0005515 | protein binding                                                       | F |
| LOC_Os06g05630.3 | GDSL-like lipase/acylhydrolase, putative, expressed              | GO:0016787 | hydrolase activity                                                    | F |
| LOC_Os06g05630.3 | GDSL-like lipase/acylhydrolase, putative, expressed              | GO:0006629 | lipid metabolic process                                               | P |
| LOC_Os06g06600.1 | OsFBX187 - F-box domain containing protein, expressed            | GO:0003674 | molecular_function                                                    | F |
| LOC_Os06g06600.1 | OsFBX187 - F-box domain containing protein, expressed            | GO:0008150 | biological_process                                                    | P |
| LOC_Os06g11490.1 | plastocyanin-like domain containing protein, putative, expressed | GO:0003674 | molecular_function                                                    | F |
| LOC_Os06g11490.1 | plastocyanin-like domain containing protein, putative, expressed | GO:0005488 | binding                                                               | F |
| LOC_Os06g11490.1 | plastocyanin-like domain containing protein, putative, expressed | GO:0016020 | membrane                                                              | C |
| LOC_Os06g40330.1 | MYB family transcription factor, putative, expressed             | GO:0040007 | growth                                                                | P |
| LOC_Os06g40330.1 | MYB family transcription factor, putative, expressed             | GO:0003677 | DNA binding                                                           | F |
| LOC_Os06g40330.1 | MYB family transcription factor, putative, expressed             | GO:0005634 | nucleus                                                               | C |
| LOC_Os06g40330.1 | MYB family transcription factor, putative, expressed             | GO:0009058 | biosynthetic process                                                  | P |
| LOC_Os06g40330.1 | MYB family transcription factor, putative, expressed             | GO:0006139 | nucleobase, nucleoside, nucleotide and nucleic acid metabolic process | P |
| LOC_Os06g40330.1 | MYB family transcription factor, putative, expressed             | GO:0000003 | reproduction                                                          | P |
| LOC_Os06g40330.1 | MYB family transcription factor, putative, expressed             | GO:0030154 | cell differentiation                                                  | P |
| LOC_Os06g40330.1 | MYB family transcription factor, putative, expressed             | GO:0007275 | multicellular organismal development                                  | P |
| LOC_Os06g40330.1 | MYB family transcription factor, putative, expressed             | GO:0009719 | response to endogenous stimulus                                       | P |
| LOC_Os06g40330.1 | MYB family transcription factor, putative, expressed             | GO:0008150 | biological_process                                                    | P |
| LOC_Os06g40330.1 | MYB family transcription factor, putative, expressed             | GO:0008219 | cell death                                                            | P |
| LOC_Os06g40330.1 | MYB family transcription factor, putative, expressed             | GO:0003700 | sequence-specific DNA binding transcription factor activity           | F |
| LOC_Os06g40330.1 | MYB family transcription factor, putative, expressed             | GO:0007165 | signal transduction                                                   | P |
| LOC_Os06g45310.1 | OsSPL11 - SBP-box gene family member, expressed                  | GO:0003677 | DNA binding                                                           | F |
| LOC_Os06g45310.1 | OsSPL11 - SBP-box gene family member, expressed                  | GO:0005634 | nucleus                                                               | C |
| LOC_Os06g45310.1 | OsSPL11 - SBP-box gene family member, expressed                  | GO:0007275 | multicellular organismal development                                  | P |
| LOC_Os06g45310.1 | OsSPL11 - SBP-box gene family member, expressed                  | GO:0009058 | biosynthetic process                                                  | P |
| LOC_Os06g45310.1 | OsSPL11 - SBP-box gene family member, expressed                  | GO:0006139 | nucleobase, nucleoside, nucleotide and nucleic acid metabolic process | P |
| LOC_Os06g45310.1 | OsSPL11 - SBP-box gene family member, expressed                  | GO:0009653 | anatomical structure morphogenesis                                    | P |
| LOC_Os06g45310.1 | OsSPL11 - SBP-box gene family member, expressed                  | GO:0003700 | sequence-specific DNA binding transcription factor activity           | F |
| LOC_Os06g46410.1 | auxin response factor, putative, expressed                       | GO:0009908 | flower development                                                    | P |
| LOC_Os06g46410.1 | auxin response factor, putative, expressed                       | GO:0009719 | response to endogenous stimulus                                       | P |
| LOC_Os06g46410.1 | auxin response factor, putative, expressed                       | GO:0005634 | nucleus                                                               | C |
| LOC_Os06g46410.1 | auxin response factor, putative, expressed                       | GO:0009058 | biosynthetic process                                                  | P |
| LOC_Os06g46410.1 | auxin response factor, putative, expressed                       | GO:0006139 | nucleobase, nucleoside, nucleotide and nucleic acid metabolic process | P |
| LOC_Os06g46410.1 | auxin response factor, putative, expressed                       | GO:0003700 | sequence-specific DNA binding transcription factor activity           | F |



|                  |                                                 |            |                                                                       |   |
|------------------|-------------------------------------------------|------------|-----------------------------------------------------------------------|---|
| LOC_Os06g47150.4 | auxin response factor 18, putative, expressed   | GO:0006139 | nucleobase, nucleoside, nucleotide and nucleic acid metabolic process | P |
| LOC_Os06g47150.4 | auxin response factor 18, putative, expressed   | GO:0007275 | multicellular organismal development                                  | P |
| LOC_Os06g47150.4 | auxin response factor 18, putative, expressed   | GO:0003700 | sequence-specific DNA binding transcription factor activity           | F |
| LOC_Os06g47150.4 | auxin response factor 18, putative, expressed   | GO:0009908 | flower development                                                    | P |
| LOC_Os06g47150.4 | auxin response factor 18, putative, expressed   | GO:0005634 | nucleus                                                               | C |
| LOC_Os06g47150.4 | auxin response factor 18, putative, expressed   | GO:0008150 | biological_process                                                    | P |
| LOC_Os06g47150.4 | auxin response factor 18, putative, expressed   | GO:0003723 | RNA binding                                                           | F |
| LOC_Os06g47150.4 | auxin response factor 18, putative, expressed   | GO:0009987 | cellular process                                                      | P |
| LOC_Os06g47150.4 | auxin response factor 18, putative, expressed   | GO:0040007 | growth                                                                | P |
| LOC_Os06g47150.4 | auxin response factor 18, putative, expressed   | GO:0019748 | secondary metabolic process                                           | P |
| LOC_Os06g47850.1 | zinc finger family protein, putative, expressed | GO:0009058 | biosynthetic process                                                  | P |
| LOC_Os06g47850.1 | zinc finger family protein, putative, expressed | GO:0006139 | nucleobase, nucleoside, nucleotide and nucleic acid metabolic process | P |
| LOC_Os06g47850.1 | zinc finger family protein, putative, expressed | GO:0003700 | sequence-specific DNA binding transcription factor activity           | F |
| LOC_Os06g48240.1 | AAA ATPase, putative, expressed                 | GO:0005623 | cell                                                                  | C |
| LOC_Os06g48240.1 | AAA ATPase, putative, expressed                 | GO:0008152 | metabolic process                                                     | P |
| LOC_Os06g48240.1 | AAA ATPase, putative, expressed                 | GO:0000166 | nucleotide binding                                                    | F |
| LOC_Os06g48240.1 | AAA ATPase, putative, expressed                 | GO:0016787 | hydrolase activity                                                    | F |
| LOC_Os06g48240.1 | AAA ATPase, putative, expressed                 | GO:0009056 | catabolic process                                                     | P |
| LOC_Os06g48240.1 | AAA ATPase, putative, expressed                 | GO:0006139 | nucleobase, nucleoside, nucleotide and nucleic acid metabolic process | P |
| LOC_Os06g49010.1 | OsSPL12 - SBP-box gene family member, expressed | GO:0009908 | flower development                                                    | P |
| LOC_Os06g49010.1 | OsSPL12 - SBP-box gene family member, expressed | GO:0003677 | DNA binding                                                           | F |
| LOC_Os06g49010.1 | OsSPL12 - SBP-box gene family member, expressed | GO:0005634 | nucleus                                                               | C |
| LOC_Os06g49010.1 | OsSPL12 - SBP-box gene family member, expressed | GO:0007275 | multicellular organismal development                                  | P |
| LOC_Os06g49010.1 | OsSPL12 - SBP-box gene family member, expressed | GO:0009058 | biosynthetic process                                                  | P |
| LOC_Os06g49010.1 | OsSPL12 - SBP-box gene family member, expressed | GO:0006139 | nucleobase, nucleoside, nucleotide and nucleic acid metabolic process | P |
| LOC_Os06g49010.1 | OsSPL12 - SBP-box gene family member, expressed | GO:0003700 | sequence-specific DNA binding transcription factor activity           | F |
| LOC_Os06g49010.2 | OsSPL12 - SBP-box gene family member, expressed | GO:0009908 | flower development                                                    | P |
| LOC_Os06g49010.2 | OsSPL12 - SBP-box gene family member, expressed | GO:0003677 | DNA binding                                                           | F |
| LOC_Os06g49010.2 | OsSPL12 - SBP-box gene family member, expressed | GO:0005634 | nucleus                                                               | C |
| LOC_Os06g49010.2 | OsSPL12 - SBP-box gene family member, expressed | GO:0007275 | multicellular organismal development                                  | P |
| LOC_Os06g49010.2 | OsSPL12 - SBP-box gene family member, expressed | GO:0009058 | biosynthetic process                                                  | P |
| LOC_Os06g49010.2 | OsSPL12 - SBP-box gene family member, expressed | GO:0006139 | nucleobase, nucleoside, nucleotide and nucleic acid metabolic process | P |
| LOC_Os06g49010.2 | OsSPL12 - SBP-box gene family member, expressed | GO:0003700 | sequence-specific DNA binding transcription factor activity           | F |
| LOC_Os06g49010.3 | OsSPL12 - SBP-box gene family member, expressed | GO:0009908 | flower development                                                    | P |
| LOC_Os06g49010.3 | OsSPL12 - SBP-box gene family member, expressed | GO:0003677 | DNA binding                                                           | F |
| LOC_Os06g49010.3 | OsSPL12 - SBP-box gene family member, expressed | GO:0005634 | nucleus                                                               | C |
| LOC_Os06g49010.3 | OsSPL12 - SBP-box gene family member, expressed | GO:0007275 | multicellular organismal development                                  | P |
| LOC_Os06g49010.3 | OsSPL12 - SBP-box gene family member, expressed | GO:0009058 | biosynthetic process                                                  | P |
| LOC_Os06g49010.3 | OsSPL12 - SBP-box gene family member, expressed | GO:0006139 | nucleobase, nucleoside, nucleotide and nucleic acid metabolic process | P |
| LOC_Os06g49010.3 | OsSPL12 - SBP-box gene family member, expressed | GO:0003700 | sequence-specific DNA binding transcription factor activity           | F |
| LOC_Os06g49010.4 | OsSPL12 - SBP-box gene family member, expressed | GO:0009908 | flower development                                                    | P |
| LOC_Os06g49010.4 | OsSPL12 - SBP-box gene family member, expressed | GO:0003677 | DNA binding                                                           | F |
| LOC_Os06g49010.4 | OsSPL12 - SBP-box gene family member, expressed | GO:0005634 | nucleus                                                               | C |
| LOC_Os06g49010.4 | OsSPL12 - SBP-box gene family member, expressed | GO:0007275 | multicellular organismal development                                  | P |
| LOC_Os06g49010.4 | OsSPL12 - SBP-box gene family member, expressed | GO:0009058 | biosynthetic process                                                  | P |
| LOC_Os06g49010.4 | OsSPL12 - SBP-box gene family member, expressed | GO:0006139 | nucleobase, nucleoside, nucleotide and nucleic acid metabolic process | P |
| LOC_Os06g49010.4 | OsSPL12 - SBP-box gene family member, expressed | GO:0003700 | sequence-specific DNA binding transcription factor activity           | F |
| LOC_Os06g49010.5 | OsSPL12 - SBP-box gene family member, expressed | GO:0009908 | flower development                                                    | P |
| LOC_Os06g49010.5 | OsSPL12 - SBP-box gene family member, expressed | GO:0003677 | DNA binding                                                           | F |
| LOC_Os06g49010.5 | OsSPL12 - SBP-box gene family member, expressed | GO:0005634 | nucleus                                                               | C |
| LOC_Os06g49010.5 | OsSPL12 - SBP-box gene family member, expressed | GO:0007275 | multicellular organismal development                                  | P |
| LOC_Os06g49010.5 | OsSPL12 - SBP-box gene family member, expressed | GO:0009058 | biosynthetic process                                                  | P |



|                  |                                                                  |            |                                                                       |   |
|------------------|------------------------------------------------------------------|------------|-----------------------------------------------------------------------|---|
| LOC_Os06g49010.5 | OsSPL12 - SBP-box gene family member, expressed                  | GO:0006139 | nucleobase, nucleoside, nucleotide and nucleic acid metabolic process | P |
| LOC_Os06g49010.5 | OsSPL12 - SBP-box gene family member, expressed                  | GO:0003700 | sequence-specific DNA binding transcription factor activity           | F |
| LOC_Os06g49010.6 | OsSPL12 - SBP-box gene family member, expressed                  | GO:0009908 | flower development                                                    | P |
| LOC_Os06g49010.6 | OsSPL12 - SBP-box gene family member, expressed                  | GO:0003677 | DNA binding                                                           | F |
| LOC_Os06g49010.6 | OsSPL12 - SBP-box gene family member, expressed                  | GO:0005634 | nucleus                                                               | C |
| LOC_Os06g49010.6 | OsSPL12 - SBP-box gene family member, expressed                  | GO:0007275 | multicellular organismal development                                  | P |
| LOC_Os06g49010.6 | OsSPL12 - SBP-box gene family member, expressed                  | GO:0009058 | biosynthetic process                                                  | P |
| LOC_Os06g49010.6 | OsSPL12 - SBP-box gene family member, expressed                  | GO:0006139 | nucleobase, nucleoside, nucleotide and nucleic acid metabolic process | P |
| LOC_Os06g49010.6 | OsSPL12 - SBP-box gene family member, expressed                  | GO:0003700 | sequence-specific DNA binding transcription factor activity           | F |
| LOC_Os07g11790.1 | terpene synthase, putative, expressed                            | GO:0005575 | cellular_component                                                    | C |
| LOC_Os07g11790.1 | terpene synthase, putative, expressed                            | GO:0009607 | response to biotic stimulus                                           | P |
| LOC_Os07g11790.1 | terpene synthase, putative, expressed                            | GO:0009058 | biosynthetic process                                                  | P |
| LOC_Os07g11790.1 | terpene synthase, putative, expressed                            | GO:0009987 | cellular process                                                      | P |
| LOC_Os07g11790.1 | terpene synthase, putative, expressed                            | GO:0006629 | lipid metabolic process                                               | P |
| LOC_Os07g11790.1 | terpene synthase, putative, expressed                            | GO:0003824 | catalytic activity                                                    | F |
| LOC_Os07g32170.1 | OsSPL13 - SBP-box gene family member, expressed                  | GO:0009791 | post-embryonic development                                            | P |
| LOC_Os07g32170.1 | OsSPL13 - SBP-box gene family member, expressed                  | GO:0003677 | DNA binding                                                           | F |
| LOC_Os07g32170.1 | OsSPL13 - SBP-box gene family member, expressed                  | GO:0005634 | nucleus                                                               | C |
| LOC_Os07g32170.1 | OsSPL13 - SBP-box gene family member, expressed                  | GO:0009058 | biosynthetic process                                                  | P |
| LOC_Os07g32170.1 | OsSPL13 - SBP-box gene family member, expressed                  | GO:0006139 | nucleobase, nucleoside, nucleotide and nucleic acid metabolic process | P |
| LOC_Os07g32170.1 | OsSPL13 - SBP-box gene family member, expressed                  | GO:0003700 | sequence-specific DNA binding transcription factor activity           | F |
| LOC_Os08g36840.1 | glycoprotein 3-alpha-L-fucosyltransferase A, putative, expressed | GO:0009058 | biosynthetic process                                                  | P |
| LOC_Os08g36840.1 | glycoprotein 3-alpha-L-fucosyltransferase A, putative, expressed | GO:0006464 | protein modification process                                          | P |
| LOC_Os08g36840.1 | glycoprotein 3-alpha-L-fucosyltransferase A, putative, expressed | GO:0005975 | carbohydrate metabolic process                                        | P |
| LOC_Os08g36840.1 | glycoprotein 3-alpha-L-fucosyltransferase A, putative, expressed | GO:0016740 | transferase activity                                                  | F |
| LOC_Os08g36840.1 | glycoprotein 3-alpha-L-fucosyltransferase A, putative, expressed | GO:0008152 | metabolic process                                                     | P |
| LOC_Os08g36840.1 | glycoprotein 3-alpha-L-fucosyltransferase A, putative, expressed | GO:0005794 | Golgi apparatus                                                       | C |
| LOC_Os08g37670.1 | plastocyanin-like domain containing protein, putative, expressed | GO:0003674 | molecular_function                                                    | F |
| LOC_Os08g37670.1 | plastocyanin-like domain containing protein, putative, expressed | GO:0005488 | binding                                                               | F |
| LOC_Os08g37670.1 | plastocyanin-like domain containing protein, putative, expressed | GO:0016020 | membrane                                                              | C |
| LOC_Os09g12230.1 | ubiquitin-conjugating enzyme, putative, expressed                | GO:0019538 | protein metabolic process                                             | P |
| LOC_Os09g12230.1 | ubiquitin-conjugating enzyme, putative, expressed                | GO:0009056 | catabolic process                                                     | P |
| LOC_Os09g12230.1 | ubiquitin-conjugating enzyme, putative, expressed                | GO:0009987 | cellular process                                                      | P |
| LOC_Os09g12230.1 | ubiquitin-conjugating enzyme, putative, expressed                | GO:0006464 | protein modification process                                          | P |
| LOC_Os09g12230.1 | ubiquitin-conjugating enzyme, putative, expressed                | GO:0005886 | plasma membrane                                                       | C |
| LOC_Os09g12230.1 | ubiquitin-conjugating enzyme, putative, expressed                | GO:0003824 | catalytic activity                                                    | F |
| LOC_Os10g33940.1 | auxin response factor 18, putative, expressed                    | GO:0007275 | multicellular organismal development                                  | P |
| LOC_Os10g33940.1 | auxin response factor 18, putative, expressed                    | GO:0009719 | response to endogenous stimulus                                       | P |
| LOC_Os10g33940.1 | auxin response factor 18, putative, expressed                    | GO:0005634 | nucleus                                                               | C |
| LOC_Os10g33940.1 | auxin response factor 18, putative, expressed                    | GO:0009987 | cellular process                                                      | P |
| LOC_Os10g33940.1 | auxin response factor 18, putative, expressed                    | GO:0003723 | RNA binding                                                           | F |
| LOC_Os10g33940.1 | auxin response factor 18, putative, expressed                    | GO:0009058 | biosynthetic process                                                  | P |
| LOC_Os10g33940.1 | auxin response factor 18, putative, expressed                    | GO:0006139 | nucleobase, nucleoside, nucleotide and nucleic acid metabolic process | P |
| LOC_Os10g33940.1 | auxin response factor 18, putative, expressed                    | GO:0003700 | sequence-specific DNA binding transcription factor activity           | F |
| LOC_Os10g33960.1 | START domain containing protein, expressed                       | GO:0007275 | multicellular organismal development                                  | P |
| LOC_Os10g33960.1 | START domain containing protein, expressed                       | GO:0003677 | DNA binding                                                           | F |
| LOC_Os10g33960.1 | START domain containing protein, expressed                       | GO:0005634 | nucleus                                                               | C |
| LOC_Os10g33960.1 | START domain containing protein, expressed                       | GO:0030154 | cell differentiation                                                  | P |
| LOC_Os10g33960.1 | START domain containing protein, expressed                       | GO:0009058 | biosynthetic process                                                  | P |
| LOC_Os10g33960.1 | START domain containing protein, expressed                       | GO:0006139 | nucleobase, nucleoside, nucleotide and nucleic acid metabolic process | P |
| LOC_Os10g33960.1 | START domain containing protein, expressed                       | GO:0009653 | anatomical structure morphogenesis                                    | P |
| LOC_Os10g33960.1 | START domain containing protein, expressed                       | GO:0008289 | lipid binding                                                         | F |

|                  |                                                       |            |                                                                       |   |
|------------------|-------------------------------------------------------|------------|-----------------------------------------------------------------------|---|
| LOC_Os10g33960.1 | START domain containing protein, expressed            | GO:0003700 | sequence-specific DNA binding transcription factor activity           | F |
| LOC_Os10g33960.2 | START domain containing protein, expressed            | GO:0007275 | multicellular organismal development                                  | P |
| LOC_Os10g33960.2 | START domain containing protein, expressed            | GO:0003677 | DNA binding                                                           | F |
| LOC_Os10g33960.2 | START domain containing protein, expressed            | GO:0005634 | nucleus                                                               | C |
| LOC_Os10g33960.2 | START domain containing protein, expressed            | GO:0030154 | cell differentiation                                                  | P |
| LOC_Os10g33960.2 | START domain containing protein, expressed            | GO:0009058 | biosynthetic process                                                  | P |
| LOC_Os10g33960.2 | START domain containing protein, expressed            | GO:0006139 | nucleobase, nucleoside, nucleotide and nucleic acid metabolic process | P |
| LOC_Os10g33960.2 | START domain containing protein, expressed            | GO:0009653 | anatomical structure morphogenesis                                    | P |
| LOC_Os10g33960.2 | START domain containing protein, expressed            | GO:0008289 | lipid binding                                                         | F |
| LOC_Os10g33960.2 | START domain containing protein, expressed            | GO:0003700 | sequence-specific DNA binding transcription factor activity           | F |
| LOC_Os10g33960.3 | START domain containing protein, expressed            | GO:0007275 | multicellular organismal development                                  | P |
| LOC_Os10g33960.3 | START domain containing protein, expressed            | GO:0003677 | DNA binding                                                           | F |
| LOC_Os10g33960.3 | START domain containing protein, expressed            | GO:0005634 | nucleus                                                               | C |
| LOC_Os10g33960.3 | START domain containing protein, expressed            | GO:0030154 | cell differentiation                                                  | P |
| LOC_Os10g33960.3 | START domain containing protein, expressed            | GO:0009058 | biosynthetic process                                                  | P |
| LOC_Os10g33960.3 | START domain containing protein, expressed            | GO:0006139 | nucleobase, nucleoside, nucleotide and nucleic acid metabolic process | P |
| LOC_Os10g33960.3 | START domain containing protein, expressed            | GO:0009653 | anatomical structure morphogenesis                                    | P |
| LOC_Os10g33960.3 | START domain containing protein, expressed            | GO:0008289 | lipid binding                                                         | F |
| LOC_Os10g33960.3 | START domain containing protein, expressed            | GO:0003700 | sequence-specific DNA binding transcription factor activity           | F |
| LOC_Os10g33960.4 | START domain containing protein, expressed            | GO:0007275 | multicellular organismal development                                  | P |
| LOC_Os10g33960.4 | START domain containing protein, expressed            | GO:0003677 | DNA binding                                                           | F |
| LOC_Os10g33960.4 | START domain containing protein, expressed            | GO:0005634 | nucleus                                                               | C |
| LOC_Os10g33960.4 | START domain containing protein, expressed            | GO:0030154 | cell differentiation                                                  | P |
| LOC_Os10g33960.4 | START domain containing protein, expressed            | GO:0009058 | biosynthetic process                                                  | P |
| LOC_Os10g33960.4 | START domain containing protein, expressed            | GO:0006139 | nucleobase, nucleoside, nucleotide and nucleic acid metabolic process | P |
| LOC_Os10g33960.4 | START domain containing protein, expressed            | GO:0009653 | anatomical structure morphogenesis                                    | P |
| LOC_Os10g33960.4 | START domain containing protein, expressed            | GO:0008289 | lipid binding                                                         | F |
| LOC_Os10g33960.4 | START domain containing protein, expressed            | GO:0003700 | sequence-specific DNA binding transcription factor activity           | F |
| LOC_Os10g39520.1 | MLO domain containing protein, putative, expressed    | GO:0006950 | response to stress                                                    | P |
| LOC_Os10g39520.1 | MLO domain containing protein, putative, expressed    | GO:0016020 | membrane                                                              | C |
| LOC_Os10g39520.1 | MLO domain containing protein, putative, expressed    | GO:0008219 | cell death                                                            | P |
| LOC_Os10g39520.1 | MLO domain containing protein, putative, expressed    | GO:0005515 | protein binding                                                       | F |
| LOC_Os10g39520.1 | MLO domain containing protein, putative, expressed    | GO:0005886 | plasma membrane                                                       | C |
| LOC_Os10g40390.1 | scarecrow, putative, expressed                        | GO:0008150 | biological_process                                                    | P |
| LOC_Os10g40390.1 | scarecrow, putative, expressed                        | GO:0030154 | cell differentiation                                                  | P |
| LOC_Os10g40390.1 | scarecrow, putative, expressed                        | GO:0009058 | biosynthetic process                                                  | P |
| LOC_Os10g40390.1 | scarecrow, putative, expressed                        | GO:0006139 | nucleobase, nucleoside, nucleotide and nucleic acid metabolic process | P |
| LOC_Os10g40390.1 | scarecrow, putative, expressed                        | GO:0016043 | cellular component organization                                       | P |
| LOC_Os10g40390.1 | scarecrow, putative, expressed                        | GO:0009653 | anatomical structure morphogenesis                                    | P |
| LOC_Os10g40390.1 | scarecrow, putative, expressed                        | GO:0016049 | cell growth                                                           | P |
| LOC_Os10g40390.1 | scarecrow, putative, expressed                        | GO:0007275 | multicellular organismal development                                  | P |
| LOC_Os10g40390.1 | scarecrow, putative, expressed                        | GO:0005515 | protein binding                                                       | F |
| LOC_Os10g40390.1 | scarecrow, putative, expressed                        | GO:0009987 | cellular process                                                      | P |
| LOC_Os10g40390.1 | scarecrow, putative, expressed                        | GO:0003700 | sequence-specific DNA binding transcription factor activity           | F |
| LOC_Os10g40390.1 | scarecrow, putative, expressed                        | GO:0009536 | plastid                                                               | C |
| LOC_Os11g30370.1 | OsSPL19 - SBP-box gene family member, expressed       | GO:0009908 | flower development                                                    | P |
| LOC_Os11g30370.1 | OsSPL19 - SBP-box gene family member, expressed       | GO:0003677 | DNA binding                                                           | F |
| LOC_Os11g30370.1 | OsSPL19 - SBP-box gene family member, expressed       | GO:0005634 | nucleus                                                               | C |
| LOC_Os11g30370.1 | OsSPL19 - SBP-box gene family member, expressed       | GO:0009058 | biosynthetic process                                                  | P |
| LOC_Os11g30370.1 | OsSPL19 - SBP-box gene family member, expressed       | GO:0006139 | nucleobase, nucleoside, nucleotide and nucleic acid metabolic process | P |
| LOC_Os11g30370.1 | OsSPL19 - SBP-box gene family member, expressed       | GO:0003700 | sequence-specific DNA binding transcription factor activity           | F |
| LOC_Os11g35030.1 | growth regulating factor protein, putative, expressed | GO:0005634 | nucleus                                                               | C |

|                  |                                                                |            |                                                                       |   |
|------------------|----------------------------------------------------------------|------------|-----------------------------------------------------------------------|---|
| LOC_Os11g35030.1 | growth regulating factor protein, putative, expressed          | GO:0005515 | protein binding                                                       | F |
| LOC_Os11g35030.1 | growth regulating factor protein, putative, expressed          | GO:0007275 | multicellular organismal development                                  | P |
| LOC_Os11g35030.2 | growth regulating factor protein, putative, expressed          | GO:0005634 | nucleus                                                               | C |
| LOC_Os11g35030.2 | growth regulating factor protein, putative, expressed          | GO:0005515 | protein binding                                                       | F |
| LOC_Os11g35030.2 | growth regulating factor protein, putative, expressed          | GO:0007275 | multicellular organismal development                                  | P |
| LOC_Os12g29980.1 | growth regulating factor protein, putative, expressed          | GO:0005634 | nucleus                                                               | C |
| LOC_Os12g29980.1 | growth regulating factor protein, putative, expressed          | GO:0007275 | multicellular organismal development                                  | P |
| LOC_Os12g29980.2 | growth regulating factor protein, putative, expressed          | GO:0005634 | nucleus                                                               | C |
| LOC_Os12g29980.2 | growth regulating factor protein, putative, expressed          | GO:0007275 | multicellular organismal development                                  | P |
| LOC_Os12g31860.1 | ureide permease, putative, expressed                           | GO:0005623 | cell                                                                  | C |
| LOC_Os12g31860.1 | ureide permease, putative, expressed                           | GO:0005215 | transporter activity                                                  | F |
| LOC_Os12g31860.1 | ureide permease, putative, expressed                           | GO:0006810 | transport                                                             | P |
| LOC_Os12g31860.1 | ureide permease, putative, expressed                           | GO:0009987 | cellular process                                                      | P |
| LOC_Os12g31860.2 | ureide permease, putative, expressed                           | GO:0005623 | cell                                                                  | C |
| LOC_Os12g31860.2 | ureide permease, putative, expressed                           | GO:0005215 | transporter activity                                                  | F |
| LOC_Os12g31860.2 | ureide permease, putative, expressed                           | GO:0006810 | transport                                                             | P |
| LOC_Os12g31860.2 | ureide permease, putative, expressed                           | GO:0009987 | cellular process                                                      | P |
| LOC_Os12g31860.3 | ureide permease, putative, expressed                           | GO:0005623 | cell                                                                  | C |
| LOC_Os12g31860.3 | ureide permease, putative, expressed                           | GO:0005215 | transporter activity                                                  | F |
| LOC_Os12g31860.3 | ureide permease, putative, expressed                           | GO:0006810 | transport                                                             | P |
| LOC_Os12g31860.3 | ureide permease, putative, expressed                           | GO:0009987 | cellular process                                                      | P |
| LOC_Os12g31860.5 | ureide permease, putative, expressed                           | GO:0005623 | cell                                                                  | C |
| LOC_Os12g31860.5 | ureide permease, putative, expressed                           | GO:0008150 | biological_process                                                    | P |
| LOC_Os12g40920.1 | bZIP transcription factor domain containing protein, expressed | GO:0003677 | DNA binding                                                           | F |
| LOC_Os12g40920.1 | bZIP transcription factor domain containing protein, expressed | GO:0005515 | protein binding                                                       | F |
| LOC_Os12g40920.1 | bZIP transcription factor domain containing protein, expressed | GO:0009058 | biosynthetic process                                                  | P |
| LOC_Os12g40920.1 | bZIP transcription factor domain containing protein, expressed | GO:0006139 | nucleobase, nucleoside, nucleotide and nucleic acid metabolic process | P |
| LOC_Os12g40920.1 | bZIP transcription factor domain containing protein, expressed | GO:0003700 | sequence-specific DNA binding transcription factor activity           | F |
| LOC_Os12g40920.3 | bZIP transcription factor domain containing protein, expressed | GO:0003677 | DNA binding                                                           | F |
| LOC_Os12g40920.3 | bZIP transcription factor domain containing protein, expressed | GO:0005515 | protein binding                                                       | F |
| LOC_Os12g40920.3 | bZIP transcription factor domain containing protein, expressed | GO:0009058 | biosynthetic process                                                  | P |
| LOC_Os12g40920.3 | bZIP transcription factor domain containing protein, expressed | GO:0006139 | nucleobase, nucleoside, nucleotide and nucleic acid metabolic process | P |
| LOC_Os12g40920.3 | bZIP transcription factor domain containing protein, expressed | GO:0003700 | sequence-specific DNA binding transcription factor activity           | F |
| LOC_Os12g40920.4 | bZIP transcription factor domain containing protein, expressed | GO:0003677 | DNA binding                                                           | F |
| LOC_Os12g40920.4 | bZIP transcription factor domain containing protein, expressed | GO:0005515 | protein binding                                                       | F |
| LOC_Os12g40920.4 | bZIP transcription factor domain containing protein, expressed | GO:0009058 | biosynthetic process                                                  | P |
| LOC_Os12g40920.4 | bZIP transcription factor domain containing protein, expressed | GO:0006139 | nucleobase, nucleoside, nucleotide and nucleic acid metabolic process | P |
| LOC_Os12g40920.4 | bZIP transcription factor domain containing protein, expressed | GO:0003700 | sequence-specific DNA binding transcription factor activity           | F |
| LOC_Os12g41860.1 | START domain containing protein, expressed                     | GO:0003677 | DNA binding                                                           | F |
| LOC_Os12g41860.1 | START domain containing protein, expressed                     | GO:0005634 | nucleus                                                               | C |
| LOC_Os12g41860.1 | START domain containing protein, expressed                     | GO:0007275 | multicellular organismal development                                  | P |
| LOC_Os12g41860.1 | START domain containing protein, expressed                     | GO:0009058 | biosynthetic process                                                  | P |
| LOC_Os12g41860.1 | START domain containing protein, expressed                     | GO:0006139 | nucleobase, nucleoside, nucleotide and nucleic acid metabolic process | P |
| LOC_Os12g41860.1 | START domain containing protein, expressed                     | GO:0009653 | anatomical structure morphogenesis                                    | P |
| LOC_Os12g41860.1 | START domain containing protein, expressed                     | GO:0000003 | reproduction                                                          | P |
| LOC_Os12g41860.1 | START domain containing protein, expressed                     | GO:0009791 | post-embryonic development                                            | P |
| LOC_Os12g41860.1 | START domain containing protein, expressed                     | GO:0009790 | embryo development                                                    | P |
| LOC_Os12g41860.1 | START domain containing protein, expressed                     | GO:0009908 | flower development                                                    | P |
| LOC_Os12g41860.1 | START domain containing protein, expressed                     | GO:0003700 | sequence-specific DNA binding transcription factor activity           | F |
| LOC_Os12g41950.1 | auxin response factor, putative, expressed                     | GO:0009908 | flower development                                                    | P |
| LOC_Os12g41950.1 | auxin response factor, putative, expressed                     | GO:0009719 | response to endogenous stimulus                                       | P |
| LOC_Os12g41950.1 | auxin response factor, putative, expressed                     | GO:0005634 | nucleus                                                               | C |

|                  |                                            |            |                                                                       |   |
|------------------|--------------------------------------------|------------|-----------------------------------------------------------------------|---|
| LOC_Os12g41950.1 | auxin response factor, putative, expressed | GO:0009058 | biosynthetic process                                                  | P |
| LOC_Os12g41950.1 | auxin response factor, putative, expressed | GO:0006139 | nucleobase, nucleoside, nucleotide and nucleic acid metabolic process | P |
| LOC_Os12g41950.1 | auxin response factor, putative, expressed | GO:0003700 | sequence-specific DNA binding transcription factor activity           | F |
